# Supplementary material for: Generating Multibillion Chemical Space of Readily Accessible Screening Compounds
Source: PubMed Central journal article supplement — iScience. 2020 Oct 15;23(11):101681. doi: 10.1016/j.isci.2020.101681 (PMC7593547; doi:10.1016/j.isci.2020.101681), 2020-10-15
Supplement: mmc1.pdf [file mmc1.pdf]

iScience, Volume 23

## **Supplemental Information**

### **Generating Multibillion Chemical Space of Readily Accessible Screening Compounds**

**Oleksandr O. Grygorenko, Dmytro S. Radchenko, Igor Dziuba, Alexander  
Chuprina, Kateryna E. Gubina, and Yurii S. Moroz**

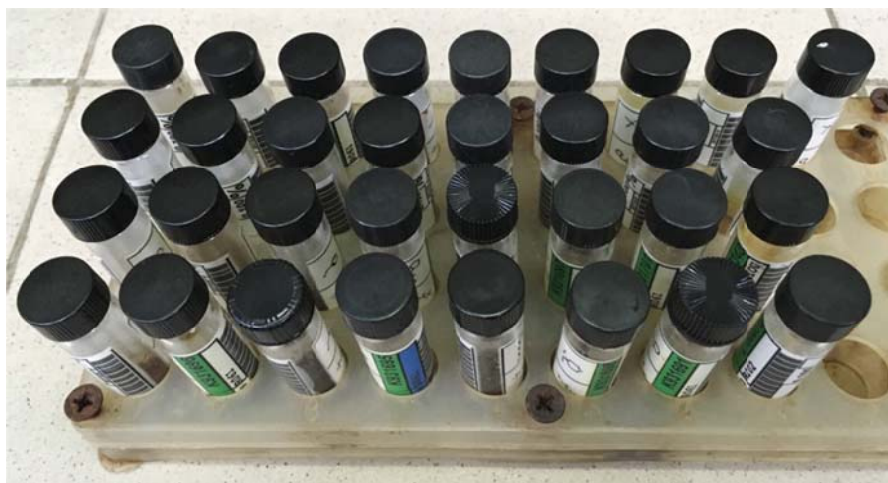

**Figure S1.** The parallel reactions set up (related to Scheme 1 and Table 1). Reprinted with permission from: Bogolubsky, A. V., Moroz, Y. S. et al. (2018) *ACS Comb. Sci.* 20, 35–43. Copyright © 2018, American Chemical Society

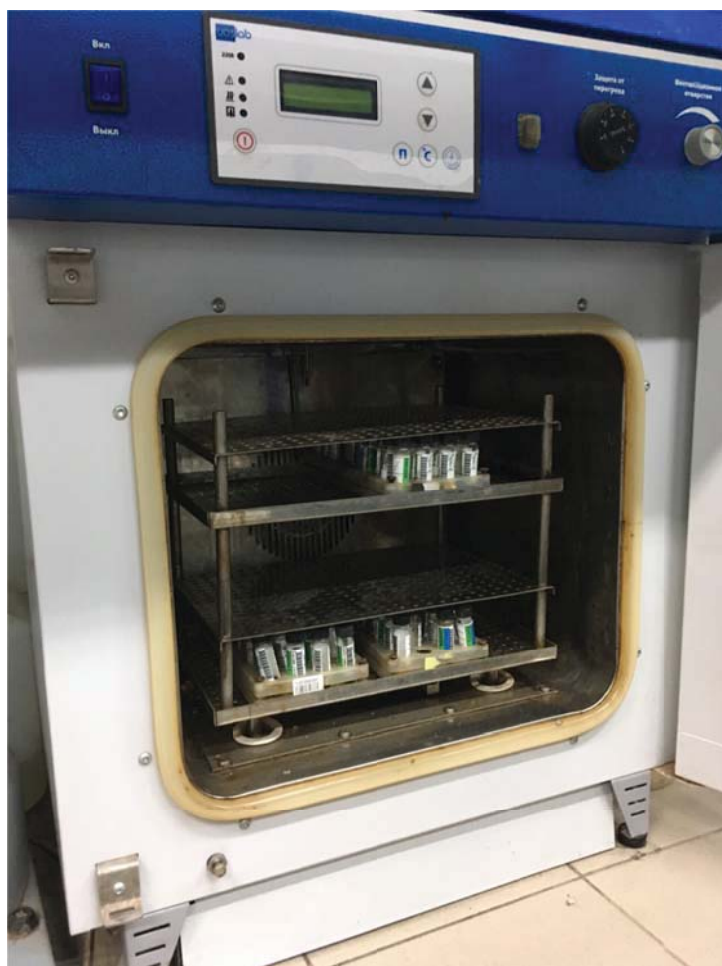

**Figure S2.** A laboratory oven with a shaker (related to Scheme 1 and Table 1). Reprinted with permission from: Bogolubsky, A. V., Moroz, Y. S. et al. (2018) *ACS Comb. Sci.* 20, 35–43. Copyright © 2018, American Chemical Society

**Table S3.** Data used to build the diagrams in Figure 6.

| MW   | Method <b>A</b> |           | Method <b>E</b> |           | Total       |           |
|------|-----------------|-----------|-----------------|-----------|-------------|-----------|
|      | No. of cpds     | % of cpds | No. of cpds     | % of cpds | No. of cpds | % of cpds |
| <150 | 0               | 0         | 0               | 0         | 0           | 0         |
| 150  | 81              | 0.000     | 2               | 0.000     | 83          | 0.000     |
| 200  | 24865           | 0.000     | 1506            | 0.000     | 26371       | 0.000     |
| 250  | 2928095         | 0.011     | 146677          | 0.009     | 3074772     | 0.011     |
| 300  | 126840477       | 0.465     | 4818124         | 0.308     | 131658601   | 0.456     |
| 350  | 1690324822      | 6.192     | 45585024        | 2.915     | 1735909846  | 6.015     |
| 400  | 7949008636      | 29.120    | 182488242       | 11.670    | 8131496878  | 28.178    |
| 450  | 11893243921     | 43.569    | 354039102       | 22.640    | 12247283023 | 42.440    |
| 500  | 4975547385      | 18.227    | 405752895       | 25.947    | 5381300280  | 18.647    |
| 550  | 644594878       | 2.361     | 312759436       | 20.000    | 957354314   | 3.317     |
| 600  | 14483114        | 0.053     | 170017630       | 10.872    | 184500744   | 0.639     |
| 650  | 400282          | 0.001     | 66893317        | 4.278     | 67293599    | 0.233     |
| >650 | 1088            | 0.000     | 18214639        | 1.165     | 18215727    | 0.063     |
| All  | 27297397644     | 100       | 1560716594      | 100       | 28858114238 | 100       |

| sLogP | Method <b>A</b> |           | Method <b>E</b> |           | Total       |           |
|-------|-----------------|-----------|-----------------|-----------|-------------|-----------|
|       | No. of cpds     | % of cpds | No. of cpds     | % of cpds | No. of cpds | % of cpds |
| <-2   | 9680365         | 0.035     | 151552          | 0.010     | 9680365     | 0.034     |
| -2    | 71464639        | 0.262     | 1726477         | 0.110     | 73191116    | 0.254     |
| -1    | 387167997       | 1.418     | 12021028        | 0.769     | 399189025   | 1.384     |
| 0     | 1439959065      | 5.275     | 51921069        | 3.320     | 1491880134  | 5.171     |
| 1     | 3783279941      | 13.859    | 151434129       | 9.684     | 3934714070  | 13.638    |
| 2     | 6666422497      | 24.421    | 298753963       | 19.105    | 6965176460  | 24.142    |
| 3     | 7536160005      | 27.608    | 399412101       | 25.542    | 7935572106  | 27.505    |
| 4     | 5124595911      | 18.773    | 354665763       | 22.680    | 5479261674  | 18.991    |
| 5     | 1906945290      | 6.986     | 201575452       | 12.890    | 2108520742  | 7.308     |
| 6     | 344499995       | 1.262     | 72158367        | 4.614     | 416658362   | 1.444     |
| >6    | 27221939        | 0.100     | 19932715        | 1.275     | 47154654    | 0.163     |
| All   | 27287717279     | 100       | 1563601064      | 100       | 28851318343 | 100       |

| HAcc | Method <b>A</b> |           | Method <b>E</b> |           | Total       |           |
|------|-----------------|-----------|-----------------|-----------|-------------|-----------|
|      | No. of cpds     | % of cpds | No. of cpds     | % of cpds | No. of cpds | % of cpds |
| 0    | 0               | 0         | 0               | 0         | 0           | 0         |
| 1    | 0               | 0         | 0               | 0         | 0           | 0         |
| 2    | 572147399       | 2.096     | 0               | 0         | 572147399   | 1.982     |
| 3    | 2747814751      | 10.066    | 0               | 0         | 2747814751  | 9.521     |
| 4    | 5737303319      | 21.018    | 9610832         | 0.615     | 5746914151  | 19.912    |
| 5    | 7004112548      | 25.659    | 81854862        | 5.235     | 7085967410  | 24.552    |
| 6    | 5696047963      | 20.867    | 232148220       | 14.846    | 5928196183  | 20.540    |
| 7    | 3345554738      | 12.256    | 369738217       | 23.644    | 3715292955  | 12.873    |
| 8    | 1493257821      | 5.470     | 372963949       | 23.851    | 1866221770  | 6.466     |
| 9    | 520065936       | 1.905     | 265014059       | 16.947    | 785079995   | 2.720     |
| 10   | 143470151       | 0.526     | 143570857       | 9.181     | 287041008   | 0.995     |
| >10  | 37623018        | 0.138     | 88851620        | 5.682     | 126474638   | 0.438     |
| All  | 27297397644     | 100       | 1563752616      | 100       | 28861150260 | 100       |

| HDon | Method <b>A</b> |           | Method <b>E</b> |           | Total       |           |
|------|-----------------|-----------|-----------------|-----------|-------------|-----------|
|      | No. of cpds     | % of cpds | No. of cpds     | % of cpds | No. of cpds | % of cpds |
| 0    | 3187748954      | 11.6778   | 313693134       | 20.06028  | 3501442088  | 12.26534  |
| 1    | 11514063585     | 42.1801   | 661866465       | 42.32552  | 12175930050 | 42.65154  |
| 2    | 8814595589      | 32.2910   | 436524642       | 27.9152   | 9251120231  | 32.40611  |
| 3    | 3107816412      | 11.3850   | 129777225       | 8.299089  | 3237593637  | 11.34109  |
| 4    | 602113896       | 2.2058    | 20101362        | 1.285457  | 622215258   | 2.179582  |
| 5    | 66845429        | 0.2449    | 1703616         | 0.108944  | 68549045    | 0.240123  |
| >5   | 4213779         | 0.0154    | 86172           | 0.005511  | 4299951     | 0.015062  |
| All  | 27297397644     | 100       | 1250059482      | 100       | 28547457126 | 100       |

| RotB | Method <b>A</b> |           | Method <b>E</b> |           | Total       |           |
|------|-----------------|-----------|-----------------|-----------|-------------|-----------|
|      | No. of cpds     | % of cpds | No. of cpds     | % of cpds | No. of cpds | % of cpds |
| 0    | 29957           | 0.000     | 0               | 0.000     | 29957       | 0.000     |
| 1    | 6028530         | 0.022     | 104             | 0.000     | 6028634     | 0.021     |
| 2    | 317910606       | 1.165     | 92306           | 0.006     | 318002912   | 1.118     |
| 3    | 1508875367      | 5.528     | 14538387        | 0.930     | 1523413754  | 5.356     |
| 4    | 3381280817      | 12.387    | 59564079        | 3.809     | 3440844896  | 12.096    |
| 5    | 4774360963      | 17.490    | 133246511       | 8.521     | 4907607474  | 17.253    |
| 6    | 5056521442      | 18.524    | 207941672       | 13.298    | 5264463114  | 18.507    |
| 7    | 4374782280      | 16.026    | 250341558       | 16.009    | 4625123838  | 16.259    |
| 8    | 3246990992      | 11.895    | 247807164       | 15.847    | 3494798156  | 12.286    |
| 9    | 2131540056      | 7.809     | 210797401       | 13.480    | 2342337457  | 8.234     |
| 10   | 1255491384      | 4.599     | 159490637       | 10.199    | 1414982021  | 4.974     |
| 11   | 670246782       | 2.455     | 109918272       | 7.029     | 780165054   | 2.743     |
| 12   | 326795259       | 1.197     | 70088476        | 4.482     | 396883735   | 1.395     |
| 13   | 146403645       | 0.536     | 42137017        | 2.695     | 188540662   | 0.663     |
| 14   | 61249058        | 0.224     | 24518316        | 1.568     | 85767374    | 0.302     |
| 15   | 24370304        | 0.089     | 14243016        | 0.911     | 38613320    | 0.136     |
| >15  | 14520202        | 0.053     | 19027700        | 1.217     | 33547902    | 0.118     |
| All  | 27297397644     | 100       | 1148369557      | 100       | 28445767201 | 100       |

| Fsp <sup>3</sup> | Method <b>A</b> |           | Method <b>E</b> |           | Total       |           |
|------------------|-----------------|-----------|-----------------|-----------|-------------|-----------|
|                  | No. of cpds     | % of cpds | No. of cpds     | % of cpds | No. of cpds | % of cpds |
| 0                | 602496          | 0.002     | 1442908         | 0.092     | 2045404     | 0.007     |
| 0.1              | 47724123        | 0.175     | 20483171        | 1.310     | 68207294    | 0.236     |
| 0.2              | 453879381       | 1.663     | 79048294        | 5.055     | 532927675   | 1.847     |
| 0.3              | 1904676513      | 6.978     | 185528454       | 11.864    | 2090204967  | 7.242     |
| 0.4              | 4954266113      | 18.149    | 303197434       | 19.389    | 5257463547  | 18.216    |
| 0.5              | 5884585398      | 21.557    | 299512055       | 19.153    | 6184097453  | 21.427    |
| 0.6              | 5967794224      | 21.862    | 334194659       | 21.371    | 6301988883  | 21.836    |
| 0.7              | 4483237975      | 16.424    | 173555288       | 11.099    | 4656793263  | 16.135    |
| 0.8              | 2213453075      | 8.109     | 123783792       | 7.916     | 2337236867  | 8.098     |
| 0.9              | 1387178346      | 5.082     | 43006561        | 2.750     | 1430184907  | 4.955     |
| All              | 27297397644     | 100       | 1563752616      | 100       | 28861150260 | 100       |

**Table S4.** Data used to build the diagram in Figure 7.

| % of the initial synthon set | Database size |             |             |             |
|------------------------------|---------------|-------------|-------------|-------------|
|                              | Selection 1   | Selection 2 | Selection 3 | Average     |
| 0                            | 0             | 0           | 0           | 0           |
| 5                            | 3403925       | 3428214     | 3390057     | 3407399     |
| 10                           | 27110556      | 27394230    | 27186189    | 27230325    |
| 15                           | 91840658      | 91732904    | 91402990    | 91658851    |
| 20                           | 218527689     | 218963333   | 218703739   | 218731587   |
| 25                           | 425632157     | 426936973   | 426736465   | 426435198   |
| 30                           | 738353634     | 737414660   | 738647994   | 7381387637  |
| 35                           | 1167189585    | 1170624550  | 1171458018  | 1169757384  |
| 40                           | 1747577364    | 1747527058  | 1740846423  | 1745316948  |
| 45                           | 2480899801    | 2486719501  | 2487750229  | 2485123177  |
| 50                           | 3417793869    | 3416799399  | 3419592448  | 3418061905  |
| 55                           | 4537339006    | 4550268732  | 4543764987  | 4543790908  |
| 60                           | 5906370545    | 5900799500  | 5911540359  | 5906236801  |
| 65                           | 7486457003    | 7501975505  | 7499292741  | 7495908416  |
| 70                           | 9357690180    | 9370507250  | 9356875950  | 9361691127  |
| 75                           | 11508760458   | 11507498938 | 11504122179 | 11506793858 |
| 80                           | 13948650520   | 13949995515 | 13962963245 | 13953869760 |
| 85                           | 16773978528   | 16766934320 | 16776040301 | 16772317716 |
| 90                           | 19909715437   | 19905994815 | 19912856421 | 19909522224 |
| 95                           | 23416800942   | 23390466947 | 23412827679 | 23406698523 |
| 100                          | 27297397644   | 27297397644 | 27297397644 | 27297397644 |

**Table S5.** Data used to build the diagrams in Figure 8.

| Synthon MW cut-off | Database size |
|--------------------|---------------|
| 100                | 1619048       |
| 125                | 159135441     |
| 150                | 2880024222    |
| 175                | 16838150263   |
| 200                | 26512675168   |
| 225                | 27163855694   |
| 250                | 27287325628   |
| 275                | 27297397644   |
| 300                | 27297397644   |

| Database member MW | % of the database with the synthon MW cut-off |        |        |        |
|--------------------|-----------------------------------------------|--------|--------|--------|
|                    | <100                                          | <150   | <200   | <300   |
| <150               | 0                                             | 0      | 0      | 0      |
| 150                | 0.005                                         | 0.000  | 0.000  | 0.000  |
| 200                | 1.229                                         | 0.001  | 0.000  | 0.000  |
| 250                | 47.054                                        | 0.101  | 0.011  | 0.011  |
| 300                | 51.712                                        | 4.027  | 0.478  | 0.465  |
| 350                | 0                                             | 37.191 | 6.375  | 6.192  |
| 400                | 0                                             | 55.673 | 29.960 | 29.120 |
| 450                | 0                                             | 3.006  | 44.520 | 43.569 |
| 500                | 0                                             | 0      | 17.388 | 18.227 |
| 550                | 0                                             | 0      | 1.267  | 2.361  |
| 600                | 0                                             | 0      | 0.000  | 0.053  |
| >600               | 0                                             | 0      | 0      | 0.001  |

| Database member LogP | % of the database with the synthon MW cut-off |        |        |        |
|----------------------|-----------------------------------------------|--------|--------|--------|
|                      | <100                                          | <150   | <200   | <300   |
| <-2                  | 0.063                                         | 0.065  | 0.035  | 0.035  |
| -2                   | 0.904                                         | 0.534  | 0.259  | 0.262  |
| -1                   | 6.737                                         | 2.978  | 1.417  | 1.418  |
| 0                    | 25.170                                        | 10.439 | 5.299  | 5.275  |
| 1                    | 41.718                                        | 23.251 | 13.966 | 13.859 |
| 2                    | 23.541                                        | 30.885 | 24.615 | 24.421 |
| 3                    | 1.866                                         | 22.663 | 27.724 | 27.608 |
| 4                    | 0                                             | 8.073  | 18.662 | 18.773 |
| 5                    | 0                                             | 1.075  | 6.780  | 6.986  |
| 6                    | 0                                             | 0.036  | 1.160  | 1.262  |
| >6                   | 0                                             | 0.000  | 0.082  | 0.100  |

## Transparent methods

**General.** All chemicals and solvents were obtained from Enamine Ltd. and used without further purification.  $^1\text{H}$ ,  $^{13}\text{C}$ , and  $^{19}\text{F}$  NMR spectra were acquired on Bruker Avance DRX 400, Bruker Avance DRX 500, and Agilent ProPulse 600 spectrometers using  $\text{DMSO-}d_6$  as a solvent (unless noted otherwise). Melting points were determined on a Buchi melting point apparatus. LCMS data were recorded on Agilent 1100 HPLC equipped with diode-matrix and mass-selective detector Agilent LC/MSD SL instrument, column: Zorbax SB-C18, 4.6 mm  $\times$  15 mm; eluent, A, acetonitrile – water with 0.1% of TFA (95:5), B, water with 0.1% of TFA; flow rate: 1.8 mL/min. Elemental analyses were performed at the Laboratory of Organic Analysis, Department of Chemistry, Kyiv National Taras Shevchenko University.

The transformation of the reagents into the synthons was performed by our proprietary software; this can be also easily done using an open-source software e.g. ChemAxon tools ([www.chemaxon.com](http://www.chemaxon.com)). Virtual coupling, InChi key generation and duplicate removal, calculation of descriptor values, filtering by physico-chemical parameters and structural features were performed using RDKit ([www.rdkit.org](http://www.rdkit.org)) in Python ([www.python.org](http://www.python.org)).

Syntheses of the libraries were typically performed in 8 mL vials (Figure S1); loading of the reagents, as well as work-up of the reaction mixtures was performed manually in a parallel fashion. If any of the reagents **1–10** was used as a salt, an additional amount of *i*-Pr<sub>2</sub>NEt (0.55 mmol per each equivalent of acid was added to the reaction mixture to convert the reagent into a free form at the corresponding step of the procedure indicated by an asterisk (\*). The reactions were performed in ultrasonic baths or laboratory ovens with a shaker (Figure S2); up to 1,000 vials could be used simultaneously. Centrifugal evaporators were used to remove the solvents from the vials in a parallel fashion.

**General procedure for the reaction sequence A.** *N*-Boc-diamine **1** (0.5 mmol), carboxylic acid **4** (0.6 mmol), *i*-Pr<sub>2</sub>NEt (1.25 mmol\*), and 1-[bis(dimethylamino)methylene]-1*H*-1,2,3-triazolo[4,5-*b*]pyridinium 3-oxide hexafluorophosphate (HATU) (0.575 mmol) were mixed in dry DMSO (appr. 1.4 mL). The reaction mixture was sealed and left at ambient temperature for 16 h, then evaporated under reduced pressure. Then the cleavage cocktail containing trifluoroacetic acid, triisopropylsilane, and water (93:5:2) (appr. 2 mL) was added in one portion. The mixture was stirred at ambient temperature for 6 h and evaporated under reduced pressure. The residue was taken up in DMSO (appr. 1.4 mL). Carboxylic acid **5** (0.6 mmol), *i*-PrNEt<sub>2</sub> (3 mmol\*), and HATU (0.6 mmol) were added in one portion, the reaction mixture was sealed and left at ambient temperature for 16 h, then cooled and evaporated under reduced pressure. The residue was dissolved in DMSO (appr. 1 mL), filtered, analyzed by LCMS, and transferred for the HPLC purification.

### ***N*-(9-Acetyl-9-azabicyclo[3.3.1]nonan-3-yl)-1*H*-indazole-3-carboxamide (11{52,55,23})**

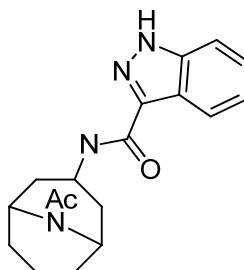



Beige solid.  $^1\text{H}$  NMR (500 MHz,  $\text{DMSO-}d_6$ )  $\delta$  13.56 (s, 1H), 8.24 (d,  $J$  = 8.8 Hz, 1H), 8.16 (d,  $J$  = 8.1 Hz, 1H), 7.60 (d,  $J$  = 8.4 Hz, 1H), 7.40 (t,  $J$  = 7.2 Hz, 1H), 7.23 (t,  $J$  = 7.5 Hz, 1H), 4.97 – 4.74 (m, 1H), 4.34 – 4.07 (m, 1H), 3.93 – 3.59 (m, 1H), 2.36 – 2.04 (m, 3H), 2.03 (s, 3H), 1.72 – 1.58 (m, 2H), 1.58 – 1.18 (m, 5H).  $^{13}\text{C}$  NMR (126 MHz,  $\text{DMSO-}d_6$ )  $\delta$  168.0, 162.0, 141.6, 138.8, 126.9, 122.4, 122.1, 122.0, 111.1, 47.8, 41.9, 40.9, 32.0, 31.5, 31.0, 21.5, 13.9. LC/MS (CI):  $m/z$  = 327  $[\text{M}+\text{H}]^+$ . Anal. calcd. for  $\text{C}_{18}\text{H}_{22}\text{N}_4\text{O}_2$ : C 66.24; H 6.79; N 17.17. Found: C 65.89; H 6.97; N 16.96.

**2-Ethyl-*N*-(4-(2-methylthiazole-5-carboxamido)butan-2-yl)oxazole-4-carboxamide (11{25,19,9})**

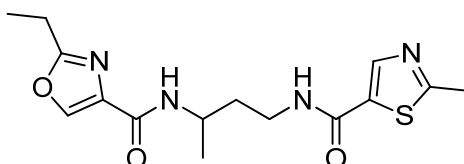

Yellowish oil.  $^1\text{H}$  NMR (500 MHz,  $\text{DMSO-}d_6$ )  $\delta$  8.48 (t,  $J$  = 5.5 Hz, 1H), 8.42 (s, 1H), 8.12 (s, 1H), 7.95 (d,  $J$  = 8.8 Hz, 1H), 4.07 – 3.98 (m, 1H), 3.28 – 3.20 (m, 1H), 3.19 – 3.12 (m, 1H), 2.76 (q,  $J$  = 7.6 Hz, 2H), 2.63 (s, 3H), 1.81 – 1.67 (m, 2H), 1.23 (t,  $J$  = 7.6 Hz, 3H), 1.14 (d,  $J$  = 6.5 Hz, 3H).  $^{13}\text{C}$  NMR (126 MHz,  $\text{DMSO-}d_6$ )  $\delta$  169.7, 165.6, 160.2, 160.0, 142.9, 141.7, 136.5, 135.5, 42.9, 37.1, 35.8, 21.4, 20.9, 19.6, 11.4. LC/MS (CI):  $m/z$  = 337  $[\text{M}+\text{H}]^+$ . Anal. calcd. for  $\text{C}_{15}\text{H}_{20}\text{N}_4\text{O}_3\text{S}$ : C 53.56; H 5.99; N 16.65; S 9.53. Found: C 53.80; H 5.91; N 16.65; S 9.32.

***N*-(4-Hydroxy-1-(isobutylpropyl)piperidin-4-yl)methylpicolinamide (11{24,21,10})**

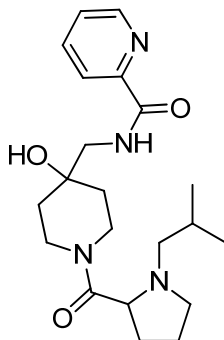

Yellowish solid. The compound existed as a ca. 1:1 mixture of rotamers.  $^1\text{H}$  NMR (500 MHz,  $\text{DMSO-}d_6$ )  $\delta$  8.63 (d,  $J$  = 4.7 Hz, 1H), 8.58 (q,  $J$  = 7.1, 6.5 Hz, 1H), 8.03 (d,  $J$  = 7.6 Hz, 1H), 7.98 (td,  $J$  = 7.6, 1.7 Hz, 1H), 7.59 (ddd,  $J$  = 6.9, 4.8, 1.5 Hz, 1H), 4.86 (s, 1H), 4.10 – 3.78 (m, 2H), 3.33 (s, 2H), 3.31 – 3.10 (m, 3H), 3.09 – 2.86 (m, 2H), 2.37 – 1.81 (m, 4H), 1.75 – 1.54 (m, 3H), 1.52 – 1.25 (m, 4H), 0.79 (t,  $J$  = 6.9 Hz, 3H), 0.74 (d,  $J$  = 5.7 Hz, 3H).  $^{13}\text{C}$  NMR (126 MHz,  $\text{DMSO-}d_6$ )  $\delta$  170.9, 164.3, 150.1, 148.9, 138.3, 127.0, 122.3, 69.4 and 69.3, 67.1 and 66.7, 63.0 and 63.0, 52.9 and 52.8, 49.1, 41.1 and 40.8, 38.2 and 37.9, 35.7 and 35.6, 35.0 and 34.8, 28.4 and 28.3, 27.4, 23.0, 21.5 and 21.4, 21.0. LC/MS (CI):  $m/z$  = 389  $[\text{M}+\text{H}]^+$ . Anal. calcd. for  $\text{C}_{21}\text{H}_{32}\text{N}_4\text{O}_3$ : C 64.92; H 8.3; N 14.42. Found: C 64.84; H 8.02; N 14.25.

***N*-(1-Cyclopropyl-2-(2-(thiazol-5-yl)acetamido)ethyl)-6-methylnicotinamide (11{30,17,13})**

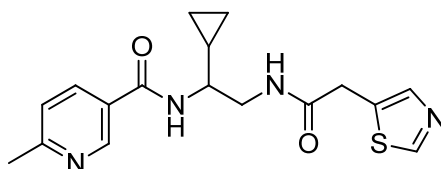

Beige solid. The compound existed as a ca. 3:1 mixture of rotamers.  $^1\text{H}$  NMR (500 MHz,  $\text{DMSO-}d_6$ )  $\delta$  9.12 – 8.61 (m, 2H), 8.53 (t,  $J = 5.7$  Hz, 0.25H) and 8.35 (d,  $J = 8.3$  Hz, 0.75H) and 8.23 (t,  $J = 5.7$  Hz, 0.75H) and 8.14 (d,  $J = 8.3$  Hz, 0.25H), 8.01 (dd,  $J = 8.1, 2.2$  Hz, 0.75H) and 7.96 (dd,  $J = 8.1, 2.2$  Hz, 0.25H), 7.64 (s, 0.25H) and 7.62 (s, 0.75H), 7.36 – 7.23 (m, 1H), 3.68 (s, 2H), 3.51 – 3.36 (m, 2H), 3.32 – 3.21 (m, 1H), 2.49 – 2.47 (m, 3H), 0.98 – 0.85 (m, 1H), 0.50 – 0.38 (m, 1H), 0.38 – 0.29 (m, 1H), 0.29 – 0.12 (m, 2H).  $^{13}\text{C}$  NMR (126 MHz,  $\text{DMSO-}d_6$ )  $\delta$  169.4 and 168.9, 165.5 and 165.1, 161.0, 154.0, 148.4 and 148.3, 141.9 and 141.8, 135.7 and 135.5, 132.8 and 132.6, 127.8 and 127.8, 123.0 and 122.9, 53.9 and 53.2, 43.7 and 43.2, 33.8 and 33.6, 24.5, 14.1 and 14.0, 3.7, 2.7 and 2.4. LC/MS (CI):  $m/z = 345$   $[\text{M}+\text{H}]^+$ . Anal. calcd. for  $\text{C}_{17}\text{H}_{20}\text{N}_4\text{O}_2\text{S}$ : C 59.28; H 5.85; N 16.27; S 9.31. Found: C 59.64; H 5.7; N 16.05; S 9.62.

**(2-(Cyclobutanecarbonyl)-2,8-diazaspiro[4.5]decan-8-yl)(tetrahydro-2H-pyran-4-yl)methanone (11{50,64,26})**

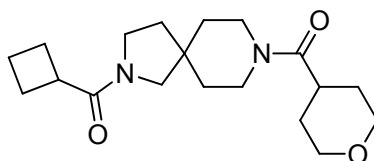

Beige solid. The compound existed as a ca. 1:1 mixture of rotamers.  $^1\text{H}$  NMR (500 MHz,  $\text{DMSO-}d_6$ )  $\delta$  3.82 (dt,  $J = 10.7, 3.2$  Hz, 2H), 3.61 – 3.33 (m, 8H), 3.26 – 3.15 (m, 3H), 2.86 (ddt,  $J = 11.3, 7.4, 3.6$  Hz, 1H), 2.18 – 2.01 (m, 4H), 1.88 (dtd,  $J = 17.4, 8.9, 5.8$  Hz, 1H), 1.82 – 1.66 (m, 3H), 1.64 – 1.53 (m, 2H), 1.53 – 1.28 (m, 6H).  $^{13}\text{C}$  NMR (126 MHz,  $\text{DMSO-}d_6$ )  $\delta$  172.6 and 172.5, 172.5 and 172.4, 66.8, 55.3, 44.0 and 43.9, 42.8 and 42.6, 41.5, 39.1 and 39.1, 37.9 and 37.6, 36.7, 35.9, 35.4 and 35.1, 34.2 and 34.0, 34.0, 29.5, 24.6, 18.0 and 17.9. LC/MS (CI):  $m/z = 335$   $[\text{M}+\text{H}]^+$ . Anal. calcd. for  $\text{C}_{19}\text{H}_{30}\text{N}_2\text{O}_3$ : C 68.23; H 9.04; N 8.38. Found: C 67.86; H 8.77; N 8.41.

**Oxazol-5-yl(2-picolinoyl-2,8-diazaspiro[4.5]decan-8-yl)methanone (11{50,69,10})**

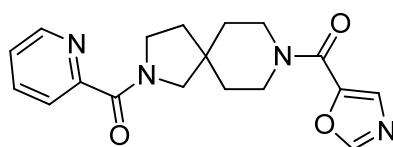

Yellowish oil. The compound existed as a ca. 1:1 mixture of rotamers.  $^1\text{H}$  NMR (500 MHz,  $\text{DMSO-}d_6$ )  $\delta$  8.58 (t,  $J = 4.2$  Hz, 1H), 8.53 (s, 0.5H) and 8.50 (s, 0H), 7.93 – 7.89 (m, 0.5H), 7.72 – 7.68 (m, 1H), 7.67 (s, 0.5H) and 7.63 (s, 0.5H), 7.47 (ddd,  $J = 7.9, 4.9, 1.5$  Hz, 1H), 3.73 – 3.56 (m, 6H), 3.51 (s, 1H) and 3.45 (s, 1H), 1.86 – 1.80 (m, 2H), 1.66 – 1.45 (m, 5H).  $^{13}\text{C}$  NMR (126 MHz,  $\text{DMSO-}d_6$ )  $\delta$  166.3 and 166.2, 157.1 and 154.5, 154.5 and 153.4, 148.6 and 148.5, 144.8 and 144.7, 137.7 and 137.6, 130.3 and 130.2, 125.4 and 123.8, 58.6, 56.3, 47.2, 45.2, 41.8, 39.3, 36.2, 33.1. LC/MS (CI):  $m/z = 341$   $[\text{M}+\text{H}]^+$ . Anal. calcd. for  $\text{C}_{18}\text{H}_{20}\text{N}_4\text{O}_3$ : C 63.52; H 5.92; N 16.46. Found: C 63.52; H 6.20; N 16.36.

**(2-(Furan-3-carbonyl)-2,7-diazaspiro[3.5]nonan-7-yl)(o-tolyl)methanone (11{60,73,32})**

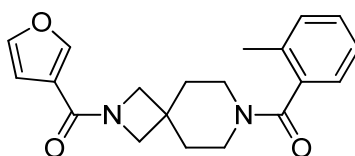

Yellowish solid.  $^1\text{H}$  NMR (500 MHz,  $\text{DMSO-}d_6$ )  $\delta$  8.10 (s, 1H), 7.73 (d,  $J = 1.6$  Hz, 1H), 7.33 – 7.17 (m, 3H), 7.13 (d,  $J = 7.5$  Hz, 1H), 6.73 – 6.64 (m, 1H), 4.15 – 4.07 (m, 1H), 4.07 – 3.99 (m, 1H), 3.77 – 3.69 (m, 2H), 3.68 – 3.43 (m, 2H), 3.13 – 3.00 (m, 2H), 2.18 (s, 3H), 1.77 (t,  $J = 5.6$  Hz, 2H), 1.67 – 1.53 (m, 2H).  $^{13}\text{C}$  NMR (126 MHz,  $\text{DMSO-}d_6$ )  $\delta$  168.9, 163.2, 145.5, 144.3, 137.0, 134.0, 130.6, 129.0, 126.2, 125.9, 120.8, 110.1, 61.3, 58.0, 43.8, 38.3, 35.5, 34.9, 34.4, 19.0. LC/MS (CI):  $m/z = 339$   $[\text{M}+\text{H}]^+$ . Anal. calcd. for  $\text{C}_{20}\text{H}_{22}\text{N}_2\text{O}_3$ : C 70.99; H 6.55; N 8.28. Found: C 71.16; H 6.62; N 8.56.

***N*-(2-Isobutyramidopropyl)-*N*-methylbenzofuran-3-carboxamide (11{67,81,37})**

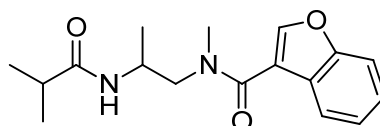

Brownish oil. The compound existed as a ca. 3:2 mixture of rotamers.  $^1\text{H}$  NMR (500 MHz,  $\text{DMSO-}d_6$ )  $\delta$  8.49 (d,  $J = 1.6$  Hz, 0.4H) and 8.44 (d,  $J = 1.6$  Hz, 0.6H), 8.17 (d,  $J = 8.7$  Hz, 0.4H) and 8.08 – 7.99 (m, 1.6H), 7.64 – 7.57 (m, 1H), 7.39 – 7.28 (m, 2H), 4.37 – 4.29 (m, 1H), 3.51 (ddd,  $J = 13.4, 8.8, 1.6$  Hz, 0.6H) and 3.48 – 3.42 (m, 0.4H), 3.30 (dd,  $J = 5.5, 1.6$  Hz, 0.6H) and 3.27 (dd,  $J = 5.5, 1.6$  Hz, 0.4H), 3.03 (d,  $J = 1.6$  Hz, 1.6H) and 3.02 – 2.96 (m, 0.4H) and 2.83 (d,  $J = 1.6$  Hz, 1.2H) and 2.78 – 2.73 (m, 0.6H), 1.17 (dd,  $J = 6.8, 1.6$  Hz, 1.2H) and 1.10 (dd,  $J = 6.7, 1.6$  Hz, 1.8H), 0.97 (dd,  $J = 6.8, 1.6$  Hz, 1.2H) and 0.93 (dd,  $J = 6.7, 1.6$  Hz, 1.8H), 0.86 (dd,  $J = 6.7, 1.6$  Hz, 1.2H) and 0.80 (dd,  $J = 6.8, 1.6$  Hz, 1.8H).  $^{13}\text{C}$  NMR (126 MHz,  $\text{DMSO-}d_6$ )  $\delta$  176.8 and 176.6, 162.0 and 161.9, 155.1, 147.7 and 147.5, 125.6 and 125.6, 125.6 and 125.4, 124.2 and 124.1, 122.4 and 122.4, 117.6 and 117.4, 112.0 and 111.9, 54.3 and 52.3, 43.9 and 43.3, 36.0 and 34.6, 29.8 and 29.3, 20.2 and 20.1 and 19.6 and 19.5, 18.5 and 18.3. LC/MS (CI):  $m/z = 303$   $[\text{M}+\text{H}]^+$ . Anal. calcd. for  $\text{C}_{17}\text{H}_{22}\text{N}_2\text{O}_3$ : C 67.53; H 7.33; N 9.26. Found: C 67.61; H 7.22; N 8.97.

**1-(2-(1-Methylcyclopropane-1-carbonyl)-2,7-diazaspiro[3.5]nonan-7-yl)-3-phenylbutan-1-one (11{60,102,51})**

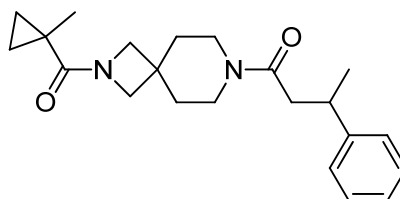

Yellowish oil.  $^1\text{H}$  NMR (500 MHz,  $\text{DMSO-}d_6$ )  $\delta$  7.32 – 7.19 (m, 4H), 7.18 – 7.09 (m, 1H), 4.10 – 3.88 (m, 2H), 3.67 – 3.33 (m, 5H), 3.19 – 3.12 (m, 1H), 2.59 (dd,  $J = 17.7, 6.5$  Hz, 1H), 2.52 (dd,  $J = 15.2, 7.8$  Hz, 1H), 1.80 – 1.31 (m, 5H), 1.20 (s, 3H), 1.18 (d,  $J = 7.0$  Hz, 3H), 0.90 – 0.79 (m, 2H), 0.48 – 0.38 (m, 2H).  $^{13}\text{C}$  NMR (151 MHz,  $\text{DMSO-}d_6$ )  $\delta$  174.5, 169.7, 147.1, 128.7, 127.3, 126.4, 42.7, 40.7, 38.7, 36.5, 35.7, 35.0, 33.9, 22.4, 20.5, 19.2, 14.2. LC/MS (CI):  $m/z = 355$   $[\text{M}+\text{H}]^+$ . Anal. calcd. for  $\text{C}_{22}\text{H}_{30}\text{N}_2\text{O}_2$ : C 74.54; H 8.53; N 7.90. Found: C 74.67; H 8.87; N 7.65.

**3-Chloro-*N*-(4-(2-(1-ethyl-1*H*-pyrazol-4-yl)acetamido)pentan-2-yl)-4-methylbenzamide (11{70,84,38})**

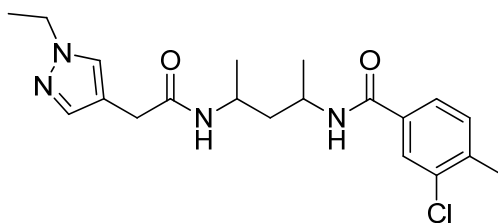

Yellowish solid. The compound existed as a ca. 3:2 mixture of rotamers.  $^1\text{H}$  NMR (500 MHz,  $\text{DMSO-}d_6$ )  $\delta$  8.27 (d,  $J = 8.2$  Hz, 0.6H) and 8.20 (d,  $J = 8.2$  Hz, 0.4H), 7.91 – 7.83 (m, 1H), 7.81 (d,  $J = 8.2$  Hz, 0.6H) and 7.74 – 7.64 (m, 1.4H), 7.52 (s, 0.6H) and 7.48 (s, 0.4H), 7.44 – 7.37 (m, 1H), 7.24 (s, 0.6H) and 7.22 (s, 0.4H), 4.20 – 3.97 (m, 3H), 3.83 – 3.74 (m, 1H), 3.16 (s, 1.2H) and 3.14 (s, 0.8H), 2.35 (s, 3H), 1.69 – 1.46 (m, 2H), 1.30 (t,  $J = 7.3$  Hz, 3H), 1.09 (d,  $J = 6.6$  Hz, 3H), 1.02 (t,  $J = 7.4$  Hz, 3H).  $^{13}\text{C}$  NMR (126 MHz,  $\text{DMSO-}d_6$ )  $\delta$  169.9 and 169.9, 164.5 and 164.3, 139.0 and 138.9, 138.6 and 138.6, 134.8 and 134.6, 133.6 and 133.6, 131.5 and 131.4, 128.3, 127.9 and 127.9, 126.5, 115.1 and 115.1, 46.4, 43.4 and 43.0, 43.0 and 42.4, 42.4 and 42.3, 32.1, 21.5 and 21.4 and 21.2 and 21.2, 20.0, 16.0. LC/MS (CI):  $m/z = 391$   $[\text{M}+\text{H}]^+$ . Anal. calcd. for  $\text{C}_{20}\text{H}_{27}\text{ClN}_4\text{O}_2$ : C 61.45; H 6.96; N 14.33; Cl 9.07. Found: C 61.47; H 6.62; N 14.39; Cl 9.02.

***N*-(4-(3-Fluoro-2-methylbenzamido)butan-2-yl)thiophene-2-carboxamide (11{83,105,54})**

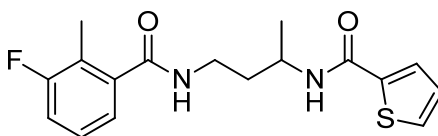

Beige solid.  $^1\text{H}$  NMR (500 MHz,  $\text{DMSO-}d_6$ )  $\delta$  8.30 (t,  $J = 5.5$  Hz, 1H), 8.26 (d,  $J = 8.3$  Hz, 1H), 7.77 (d,  $J = 3.6$  Hz, 1H), 7.71 (d,  $J = 4.9$  Hz, 1H), 7.29 – 7.22 (m, 1H), 7.22 – 7.16 (m, 1H), 7.16 – 7.04 (m, 2H), 4.11 – 4.01 (m, 1H), 3.30 – 3.18 (m, 2H), 2.19 (d,  $J = 2.2$  Hz, 3H), 1.80 – 1.67 (m, 2H), 1.17 (d,  $J = 6.6$  Hz, 3H).  $^{13}\text{C}$  NMR (126 MHz,  $\text{DMSO-}d_6$ )  $\delta$  168.1 (d,  $J = 3.1$  Hz), 161.0 (d,  $J = 243$  Hz), 160.9, 140.8, 140.3 (d,  $J = 3.8$  Hz), 131.0, 128.2, 128.2, 127.6 (d,  $J = 8.6$  Hz), 123.3 (d,  $J = 3.2$  Hz), 122.5 (d,  $J = 17.7$  Hz), 116.1 (d,  $J = 22.8$  Hz), 43.4, 36.9, 36.1, 21.0, 11.5 (d,  $J = 4.8$  Hz).  $^{19}\text{F}$  NMR (376 MHz,  $\text{DMSO-}d_6$ )  $\delta$  -116.9. LC/MS (CI):  $m/z = 335$   $[\text{M}+\text{H}]^+$ . Anal. calcd. for  $\text{C}_{17}\text{H}_{19}\text{FN}_2\text{O}_2\text{S}$ : C 61.06; H 5.73; N 8.38; S 9.59. Found: C 60.95; H 6.11; N 8.16; S 9.98.

**General procedure for the reaction sequence B.** *N*-Boc-diamine **1** (0.5 mmol), carboxylic acid **4** (0.6 mmol), and *i*-Pr<sub>2</sub>NEt (1.25 mmol\*), and HATU (0.575 mmol) were mixed in dry DMSO (appr. 1.4 mL). The reaction mixture was sealed and left at ambient temperature for 16 h, then evaporated under reduced pressure. Then the cleavage cocktail containing trifluoroacetic acid, triisopropylsilane, and water (93:5:2) (appr. 2 mL) was added in one portion. The mixture was stirred at ambient temperature for 6 h and evaporated under reduced pressure. The residue was taken up in *N*-methyl-2-pyrrolidone (NMP) (appr. 2 mL). Aryl halide **6** (0.6 mmol) and *i*-PrNEt<sub>2</sub> (3 mmol\*) were added in one portion, the reaction mixture was sealed and heated at 100 °C for 16 h, then cooled and evaporated under reduced pressure. The residue was dissolved in DMSO (appr. 1 mL), filtered, analyzed by LCMS, and transferred for the HPLC purification.

**2-(2-Methylthiophen-3-yl)-1-(2-((tetrazolo[1,5-*b*]pyridazin-6-ylamino)methyl)morpholino)ethanone (12{140,239,35})**

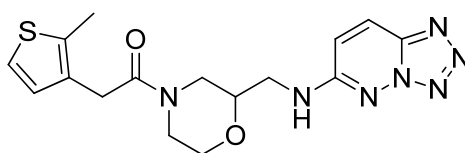

Brownish solid. The compound existed as a ca. 1:1 mixture of rotamers.  $^1\text{H}$  NMR (600 MHz,  $\text{DMSO-}d_6$ )  $\delta$  8.22 (t,  $J = 9.5$  Hz, 1H), 8.06 – 7.95 (m, 1H), 7.26 – 7.16 (m, 1H), 7.14 (d,  $J = 5.2$  Hz, 0.5H) and 7.05 (d,  $J = 5.2$  Hz, 0.5H), 6.77 (dd,  $J = 9.4, 5.2$  Hz, 1H), 4.32 (d,  $J = 13.3$  Hz, 0.5H) and 4.16 (d,  $J = 13.3$  Hz, 0.5H), 3.95 – 3.85 (m, 1H), 3.83 (d,  $J = 11.4$  Hz, 0.5H) and 3.76 (d,  $J = 13.3$  Hz, 0.5H), 3.65 – 3.32 (m, 6H), 3.16 – 3.10 (m, 0.5H) and 2.95 (dd,  $J = 13.3, 10.3$  Hz, 0.5H), 2.72 (dt,  $J = 14.0, 7.1$  Hz, 0.5H) and 2.57 – 2.52 (m, 0.5H), 2.28 (s, 1.5H) and 2.28 (s, 1.5H).  $^{13}\text{C}$  NMR (151 MHz,  $\text{DMSO-}d_6$ )  $\delta$  169.2 and 169.2, 156.2, 140.5, 134.4 and 134.3, 131.5 and 131.4, 129.7 and 129.5, 123.6, 121.9 and 121.8, 121.2, 73.4, 66.2, 48.7 and 45.8, 44.5 and 43.6, 43.3 and 41.6, 33.2 and 33.1, 13.2. LC/MS (CI):  $m/z = 374$   $[\text{M}+\text{H}]^+$ . Anal. calcd. for  $\text{C}_{16}\text{H}_{19}\text{N}_7\text{O}_2\text{S}$ : C 51.46; H 5.13; N 26.26; S 8.59. Found: C 51.20; H 5.08; N 26.20; S 8.89.

***rac*-5-((3*aR*,7*aR*)-5-(Pyrimidin-2-yl)octahydro-1*H*-pyrrolo[3,4-*c*]pyridine-2-carbonyl)-1*H*-benzo[*d*]imidazol-2(3*H*)-one (12{17,14,5})**

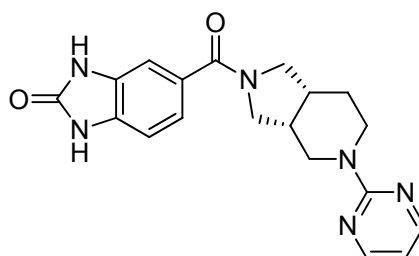

Yellowish solid. The compound existed as a ca. 3:2 mixture of rotamers.  $^1\text{H}$  NMR (500 MHz,  $\text{DMSO-}d_6$ )  $\delta$  10.79 (s, 1H), 10.70 (d,  $J = 20.3$  Hz, 1H), 8.32 (dd,  $J = 16.6, 4.7$  Hz, 2H), 7.17 – 7.00 (m, 2H), 6.95 – 6.85 (m, 1H), 6.58 (s, 1H), 4.17 – 3.74 (m, 2H), 3.68 – 3.54 (m, 2H), 3.47 (dd,  $J = 12.0, 7.8$  Hz, 1H), 3.25 – 3.15 (m, 1H), 2.45 – 2.30 (m, 2H), 1.82 – 1.69 (m, 0.4H) and 1.68 – 1.41 (m, 1H) and 1.32 – 1.17 (m, 0.6H), 1.03 (d,  $J = 6.1$  Hz, 2H).  $^{13}\text{C}$  NMR (126 MHz,  $\text{DMSO-}d_6$ )  $\delta$  169.7 and 169.5, 162.0 and 161.9, 158.4, 158.4, 155.8, 131.6 and 131.5, 129.7 and 129.7, 129.6 and 129.4, 120.8 and 120.7, 110.2 and 110.1, 108.3 and 108.1, 108.1, 62.5, 53.9, 50.9 and 47.8, 42.7 and 41.3, 37.5 and 36.7, 35.6 and 34.5, 26.0 and 25.0. LC/MS (CI):  $m/z = 365$   $[\text{M}+\text{H}]^+$ . Anal. calcd. for  $\text{C}_{19}\text{H}_{20}\text{N}_6\text{O}_2$ : C 62.62; H 5.53; N 23.06. Found: C 62.69; H 5.23; N 23.24.

**1-Methyl-5-(4-(quinoxalin-2-yl)piperazine-1-carbonyl)pyridin-2(1*H*)-one (12{9,26,3})**

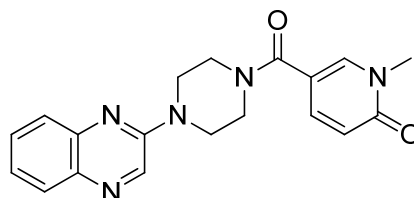

Yellowish solid.  $^1\text{H}$  NMR (500 MHz,  $\text{DMSO-}d_6$ )  $\delta$  8.84 (s, 1H), 8.05 (d,  $J = 2.5$  Hz, 1H), 7.85 (d,  $J = 8.3$  Hz, 1H), 7.71 – 7.59 (m, 2H), 7.55 (dd,  $J = 9.3, 2.5$  Hz, 1H), 7.42 (ddd,  $J = 8.2, 6.0, 2.5$  Hz, 1H), 6.43 (d,  $J = 9.3$  Hz, 1H), 3.85 (dd,  $J = 6.7, 3.8$  Hz, 4H), 3.69 (dd,  $J = 6.7, 3.8$  Hz, 4H), 3.48 (s, 3H).  $^{13}\text{C}$  NMR (126 MHz,  $\text{DMSO-}d_6$ )  $\delta$  166.8, 161.9, 152.3, 141.9, 141.4, 139.5, 137.4,

136.8, 130.5, 128.9, 126.5, 125.1, 118.7, 113.2, 44.6, 40.3, 37.6. LC/MS (CI):  $m/z = 350$  [M+H]<sup>+</sup>. Anal. calcd. for C<sub>19</sub>H<sub>19</sub>N<sub>5</sub>O<sub>2</sub>: C 65.32; H 5.48; N 20.04. Found: C 64.95; H 5.33; N 19.74.

**1-Methyl-6-(4-(quinoxalin-2-yl)piperazine-1-carbonyl)pyridin-2(1H)-one (12{9,27,3})**

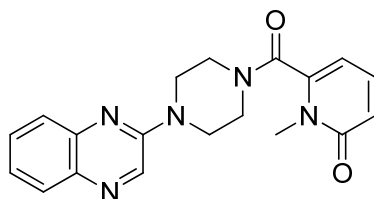

Yellowish solid. <sup>1</sup>H NMR (500 MHz, DMSO-*d*<sub>6</sub>) δ 8.83 (s, 1H), 7.83 (d, *J* = 8.1 Hz, 1H), 7.64 – 7.57 (m, 2H), 7.45 (dd, *J* = 9.1, 6.8 Hz, 1H), 7.43 – 7.39 (m, 1H), 6.46 (dd, *J* = 9.1, 1.4 Hz, 1H), 6.29 (dd, *J* = 6.8, 1.4 Hz, 1H), 3.96 – 3.88 (m, 2H), 3.86 – 3.73 (m, 4H), 3.53 – 3.43 (m, 2H), 3.32 (s, 3H). <sup>13</sup>C NMR (126 MHz, DMSO-*d*<sub>6</sub>) δ 162.4, 161.9, 152.2, 143.8, 141.2, 139.5, 137.4, 136.8, 130.6, 128.8, 126.5, 125.2, 120.2, 104.1, 46.3 and 44.7, 44.1 and 41.4, 33.0. LC/MS (CI):  $m/z = 350$  [M+H]<sup>+</sup>. Anal. calcd. for C<sub>19</sub>H<sub>19</sub>N<sub>5</sub>O<sub>2</sub>: C 65.32; H 5.48; N 20.04. Found: C 65.69; H 5.28; N 19.64.

**Cyclohex-3-en-1-yl(4-(quinoxalin-2-yl)piperazin-1-yl)methanone (12{9,28,3})**

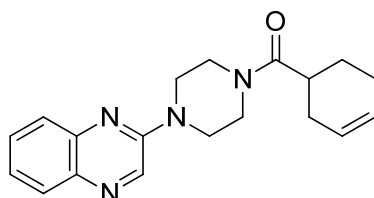

Brownish solid. <sup>1</sup>H NMR (500 MHz, DMSO-*d*<sub>6</sub>) δ 8.83 (s, 1H), 7.84 (d, *J* = 8.3 Hz, 1H), 7.67 – 7.57 (m, 2H), 7.42 (ddd, *J* = 8.3, 6.2, 2.2 Hz, 1H), 5.77 – 5.63 (m, 2H), 3.88 – 3.74 (m, 4H), 3.72 – 3.58 (m, 4H), 2.93 – 2.80 (m, 1H), 2.24 – 2.01 (m, 4H), 1.77 (dd, *J* = 12.1, 4.7 Hz, 1H), 1.59 – 1.46 (m, 1H). <sup>13</sup>C NMR (126 MHz, DMSO-*d*<sub>6</sub>) δ 174.0, 152.3, 141.4, 137.3, 136.8, 130.5, 128.9, 126.9, 126.5, 126.3, 125.0, 45.0 and 44.9, 44.5 and 41.3, 35.7, 28.1, 25.9, 24.8. LC/MS (CI):  $m/z = 323$  [M+H]<sup>+</sup>. Anal. calcd. for C<sub>19</sub>H<sub>22</sub>N<sub>4</sub>O: C 70.78; H 6.88; N 17.38. Found: C 70.99; H 7.03; N 17.44.

***N*-(2-((5,6-Dimethylthieno[2,3-*d*]pyrimidin-4-yl)(ethyl)amino)ethyl)-2-methoxypropanamide (12{45,44,24})**

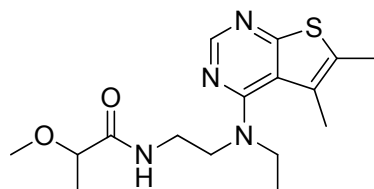

Yellowish oil. <sup>1</sup>H NMR (500 MHz, DMSO-*d*<sub>6</sub>) δ 8.39 (s, 1H), 7.73 (t, *J* = 5.9 Hz, 1H), 3.56 – 3.48 (m, 3H), 3.42 (qd, *J* = 6.9, 2.3 Hz, 2H), 3.30 – 3.22 (m, 2H), 3.13 (s, 3H), 2.40 (s, 3H), 2.34 (s, 3H), 1.06 (d, *J* = 6.7 Hz, 3H), 1.01 (t, *J* = 6.9 Hz, 3H). <sup>13</sup>C NMR (126 MHz, DMSO-*d*<sub>6</sub>) δ 172.6, 166.8, 161.7, 151.1, 131.1, 125.4, 121.6, 77.8, 57.2, 48.1, 46.5, 36.6, 18.5, 14.1, 14.0, 12.6. LC/MS (CI):  $m/z = 337$  [M+H]<sup>+</sup>. Anal. calcd. for C<sub>16</sub>H<sub>24</sub>N<sub>4</sub>O<sub>2</sub>S: C 57.12; H 7.19; N 16.65; S 9.53. Found: C 57.29; H 7.35; N 16.50; S 9.59.

**1-Methyl-4-(4-(quinoxalin-2-yl)piperazine-1-carbonyl)pyridin-2(1H)-one (12{9,48,3})**

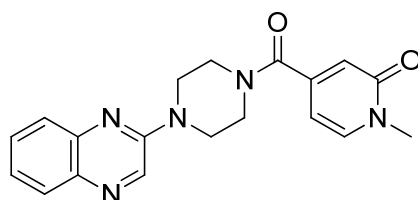

Yellowish solid.  $^1\text{H}$  NMR (500 MHz,  $\text{DMSO-}d_6$ )  $\delta$  8.81 (s, 1H), 7.83 (d,  $J = 8.2$  Hz, 1H), 7.79 (d,  $J = 6.8$  Hz, 1H), 7.68 – 7.53 (m, 2H), 7.40 (ddd,  $J = 8.2, 5.8, 2.4$  Hz, 1H), 6.38 (d,  $J = 1.6$  Hz, 1H), 6.22 (dt,  $J = 6.8, 1.6$  Hz, 1H), 4.04 – 3.60 (m, 6H), 3.57 – 3.46 (m, 2H), 3.44 (s, 3H).  $^{13}\text{C}$  NMR (126 MHz,  $\text{DMSO-}d_6$ )  $\delta$  166.8, 161.9, 152.3, 147.4, 141.3, 141.2, 137.3, 136.7, 130.5, 128.8, 126.5, 125.1, 116.6, 103.5, 46.6 and 44.7, 44.1 and 41.4, 37.3. LC/MS (CI):  $m/z = 350$   $[\text{M}+\text{H}]^+$ . Anal. calcd. for  $\text{C}_{19}\text{H}_{19}\text{N}_5\text{O}_2$ : C 65.32; H 5.48; N 20.04. Found: C 65.27; H 5.56; N 19.93.

**(2S)-2-Acetamido-N-(1-((4,6-dimethylpyrimidin-2-yl)(methyl)amino)propan-2-yl)-4-methylpentanamide (12{68,82,32})**

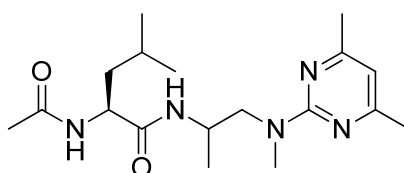

Beige solid. The compound existed as a ca. 11:9 mixture of rotamers.  $^1\text{H}$  NMR (500 MHz,  $\text{DMSO-}d_6$ )  $\delta$  7.89 – 7.79 (m, 1.45H) and 7.67 (d,  $J = 8.3$  Hz, 0.55H), 6.35 (s, 0.45H) and 6.33 (s, 0.55H), 4.20 (q,  $J = 7.9$  Hz, 0.45H) and 4.17 – 4.06 (m, 1.55H), 3.81 – 3.69 (m, 1H), 3.44 (dd,  $J = 13.7, 5.0$  Hz, 0.55H) and 3.39 (dd,  $J = 13.7, 7.5$  Hz, 0.45H), 3.05 (s, 1.35H) and 3.03 (s, 1.65H), 2.24 – 2.18 (m, 6H), 1.80 (s, 1.35H) and 1.78 (s, 1.65H), 1.57 – 1.47 (m, 0.45H) and 1.46 – 1.38 (m, 0.55H), 1.34 (t,  $J = 7.3$  Hz, 1H), 1.19 (ddd,  $J = 14.7, 10.3, 5.1$  Hz, 0.55H) and 1.03 (d,  $J = 6.6$  Hz, 2H) and 0.99 – 0.95 (m, 1.45H), 0.86 (d,  $J = 6.6$  Hz, 1.35H) and 0.81 (d,  $J = 6.6$  Hz, 1.35H) and 0.74 (d,  $J = 2.6$  Hz, 1.65H) and 0.73 (d,  $J = 2.6$  Hz, 1.65H).  $^{13}\text{C}$  NMR (126 MHz,  $\text{DMSO-}d_6$ )  $\delta$  172.0 and 171.8, 169.3, 166.7 and 166.7, 162.2 and 162.1, 108.5 and 108.5, 53.4 and 53.2, 51.6 and 51.3, 44.3 and 43.8, 41.6 and 41.4, 36.2 and 35.8, 24.7 and 24.5, 24.3 and 24.3, 23.4 and 23.4, 22.9 and 22.9, 22.2 and 21.9, 18.7 and 18.6. LC/MS (CI):  $m/z = 350$   $[\text{M}+\text{H}]^+$ . Anal. calcd. for  $\text{C}_{18}\text{H}_{31}\text{N}_5\text{O}_2$ : C 61.86; H 8.94; N 20.04. Found: C 61.64; H 8.82; N 19.94.

**(3-(Benzo[d]oxazol-2-yl(methyl)amino)pyrrolidin-1-yl)(3,3-difluoro-1-methylcyclobutyl)methanone (12{81,39,30})**

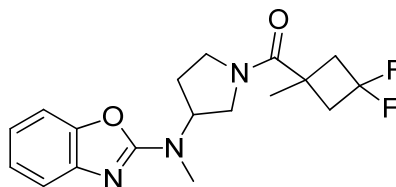

Brownish solid. The compound existed as a ca. 1:1 mixture of rotamers.  $^1\text{H}$  NMR (500 MHz,  $\text{DMSO-}d_6$ )  $\delta$  7.39 (dd,  $J = 7.8, 2.5$  Hz, 1H), 7.27 (dd,  $J = 7.8, 2.5$  Hz, 1H), 7.16 – 7.10 (m, 1H), 6.99 (t,  $J = 7.7$  Hz, 1H), 4.92 – 4.78 (m, 1H), 3.70 – 3.51 (m, 2H), 3.49 – 3.33 (m, 2H), 3.17 – 2.90 (m, 5H), 2.48 – 2.41 (m, 2H), 2.25 – 2.14 (m, 1H), 2.09 (q,  $J = 7.7$  Hz, 1H), 1.40 (d,  $J = 10.6$  Hz, 3H).  $^{13}\text{C}$  NMR (126 MHz,  $\text{DMSO-}d_6$ )  $\delta$  172.8 and 172.8, 162.7 and 162.5, 148.7, 143.4 and 143.4, 124.4, 120.8 and 120.8, 116.1 and 116.1, 109.3 and 109.3, 57.3 and 55.0, 48.0 and 47.3, 45.5 and 45.1, 45.0 – 44.0 (m), 33.5 (t,  $J = 15.3$  Hz) and 33.5 (t,  $J = 15.3$  Hz), 31.0 and 30.8, 29.1, 25.8, 23.2.  $^{19}\text{F}$  NMR (376 MHz,  $\text{DMSO-}d_6$ )  $\delta$  –83.3 (dd,  $J = 194, 30.4$  Hz), –91.7 (dd,

$J = 194, 17.3 \text{ Hz}$ ). LC/MS (CI):  $m/z = 350 [M+H]^+$ . Anal. calcd. for  $C_{18}H_{21}F_2N_3O_2$ : C 61.88; H 6.06; N 12.03. Found: C 61.86; H 5.8; N 12.24.

**(R)-1-(2-(((4-(Trifluoromethyl)pyrimidin-2-yl)amino)methyl)piperidin-1-yl)propan-1-one**  
**(12{84,40,34})**

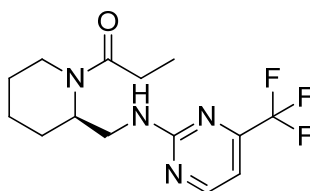

Yellowish solid.  $^1\text{H NMR}$  (600 MHz,  $\text{DMSO-}d_6$ )  $\delta$  8.58 (d,  $J = 4.8 \text{ Hz}$ , 1H), 7.70 (t,  $J = 6.4 \text{ Hz}$ , 1H), 6.88 (d,  $J = 4.8 \text{ Hz}$ , 1H), 5.01 – 4.86 (m, 1H), 4.54 (d,  $J = 13.7 \text{ Hz}$ , 1H), 3.42 – 3.31 (m, 1H), 3.29 – 3.20 (m, 1H), 3.02 (td,  $J = 14.2, 13.7, 2.6 \text{ Hz}$ , 1H), 1.87 (q,  $J = 7.6 \text{ Hz}$ , 2H), 1.75 – 1.58 (m, 3H), 1.56 – 1.42 (m, 2H), 1.35 – 1.25 (m, 1H), 0.80 (t,  $J = 7.6 \text{ Hz}$ , 3H).  $^{13}\text{C NMR}$  (151 MHz,  $\text{DMSO-}d_6$ )  $\delta$  173.2, 161.7, 161.4, 154.9 (q,  $J = 34.6 \text{ Hz}$ ), 121.1 (q,  $J = 275 \text{ Hz}$ ), 104.3 (d,  $J = 2.9 \text{ Hz}$ ), 49.9, 39.0, 37.5, 28.8, 26.0, 25.3, 19.3, 10.2.  $^{19}\text{F NMR}$  (376 MHz,  $\text{DMSO-}d_6$ )  $\delta$  –70.0. LC/MS (CI):  $m/z = 317 [M+H]^+$ . Anal. calcd. for  $C_{14}H_{19}F_3N_4O$ : C 53.16; H 6.05; N 17.71. Found: C 52.90; H 5.91; N 18.09.

**N-(1-(6-Ethyl-5-fluoropyrimidin-4-yl)piperidin-4-yl)-4,5,6,7-tetrahydrobenzo[d]isoxazole-3-carboxamide** (12{79,130,39})

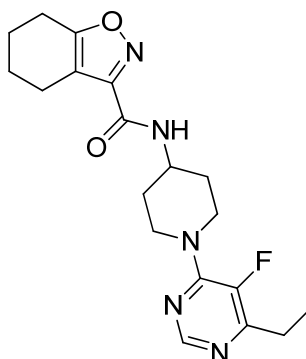

Yellowish oil.  $^1\text{H NMR}$  (500 MHz,  $\text{DMSO-}d_6$ )  $\delta$  8.57 (d,  $J = 8.2 \text{ Hz}$ , 1H), 8.27 (d,  $J = 2.5 \text{ Hz}$ , 1H), 4.36 (d,  $J = 13.4 \text{ Hz}$ , 2H), 4.14 – 3.97 (m, 1H), 3.11 (t,  $J = 12.8 \text{ Hz}$ , 2H), 2.70 (t,  $J = 6.3 \text{ Hz}$ , 2H), 2.64 (qd,  $J = 7.5, 4.7 \text{ Hz}$ , 2H), 2.57 – 2.52 (m, 2H), 1.89 – 1.82 (m, 2H), 1.81 – 1.72 (m, 2H), 1.71 – 1.65 (m, 2H), 1.65 – 1.51 (m, 2H), 1.17 (t,  $J = 7.5 \text{ Hz}$ , 3H).  $^{13}\text{C NMR}$  (126 MHz,  $\text{DMSO-}d_6$ )  $\delta$  170.1, 159.3, 156.1, 156.0 (d,  $J = 15.2 \text{ Hz}$ ), 152.9 (d,  $J = 9.7 \text{ Hz}$ ), 151.2 (d,  $J = 4.6 \text{ Hz}$ ), 144.4 (d,  $J = 257 \text{ Hz}$ ), 113.0, 46.6, 45.6, 45.5, 31.5, 23.6, 22.4, 22.2, 21.9, 20.0, 12.3.  $^{19}\text{F NMR}$  (376 MHz,  $\text{DMSO-}d_6$ )  $\delta$  –146.5. LC/MS (CI):  $m/z = 374 [M+H]^+$ . Anal. calcd. for  $C_{19}H_{24}FN_5O_2$ : C 61.11; H 6.48; N 18.75. Found: C 61.26; H 6.60; N 18.78.

**Cyclohex-3-en-1-yl(4-(7-fluorobenzo[d]thiazol-2-yl)piperazin-1-yl)methanone** (12{9,28,43})

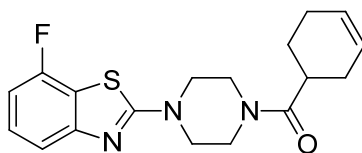

Yellowish solid.  $^1\text{H NMR}$  (500 MHz,  $\text{DMSO-}d_6$ )  $\delta$  7.38 – 7.29 (m, 2H), 7.02 – 6.93 (m, 1H), 5.73 – 5.63 (m, 2H), 3.73 – 3.53 (m, 8H), 2.92 – 2.79 (m, 1H), 2.22 – 1.99 (m, 4H), 1.83 – 1.70 (m,



1H), 1.51 (qd,  $J = 12.0, 5.6$  Hz, 1H).  $^{13}\text{C}$  NMR (126 MHz,  $\text{DMSO-}d_6$ )  $\delta$  174.0, 168.7, 156.6 (d,  $J = 245$  Hz), 155.8 (d,  $J = 2.7$  Hz), 127.8 (d,  $J = 8.0$  Hz), 126.9, 126.2, 116.7 (d,  $J = 15.8$  Hz), 115.4, 107.8 (d,  $J = 18.7$  Hz), 49.0 and 48.5, 44.6 and 40.9, 35.7, 28.1, 25.9, 24.8.  $^{19}\text{F}$  NMR (376 MHz,  $\text{DMSO-}d_6$ )  $\delta$  -113.7. LC/MS (CI):  $m/z = 346$   $[\text{M}+\text{H}]^+$ . Anal. calcd. for  $\text{C}_{18}\text{H}_{20}\text{FN}_3\text{OS}$ : C 62.59; H 5.84; N 12.16; S 9.28. Found: C 62.36; H 6.05; N 12.29; S 9.35.

***N*-(1-(5,6-Diethyl-1,2,4-triazin-3-yl)-3-methylpyrrolidin-3-yl)-3-methylisoxazole-5-carboxamide (12{49,150,31})**

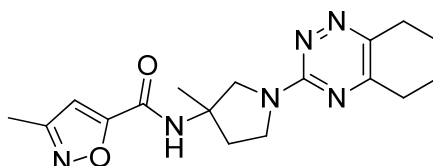

Yellowish solid.  $^1\text{H}$  NMR (500 MHz,  $\text{DMSO-}d_6$ )  $\delta$  8.76 (s, 1H), 6.92 (s, 1H), 4.05 (d,  $J = 11.6$  Hz, 1H), 3.78 – 3.47 (m, 3H), 2.76 (q,  $J = 7.4$  Hz, 2H), 2.66 (q,  $J = 7.4$  Hz, 2H), 2.58 – 2.52 (m, 1H), 2.27 (s, 3H), 2.22 – 1.96 (m, 1H), 1.51 (s, 3H), 1.28 – 1.16 (m, 6H).  $^{13}\text{C}$  NMR (126 MHz,  $\text{DMSO-}d_6$ )  $\delta$  163.7, 162.0, 160.8, 159.1, 156.4, 150.6, 107.6, 59.3, 56.8, 44.9, 36.7, 26.5, 24.6, 23.0, 13.2, 11.4, 11.2. LC/MS (CI):  $m/z = 345$   $[\text{M}+\text{H}]^+$ . Anal. calcd. for  $\text{C}_{17}\text{H}_{24}\text{N}_6\text{O}_2$ : C 59.28; H 7.02; N 24.4. Found: C 59.68; H 6.97; N 24.11.

***N*-(6-(4-Cyano-3-methylisothiazol-5-yl)-6-azaspiro[2.5]octan-1-yl)-1-isobutyl-1H-pyrazole-3-carboxamide (12{31,29,13})**

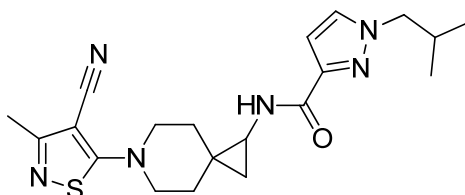

Yellowish solid.  $^1\text{H}$  NMR (500 MHz,  $\text{DMSO-}d_6$ )  $\delta$  8.14 (d,  $J = 3.4$  Hz, 1H), 7.78 (d,  $J = 1.5$  Hz, 1H), 6.63 (d,  $J = 1.5$  Hz, 1H), 3.95 (d,  $J = 7.3$  Hz, 2H), 3.74 – 3.64 (m, 2H), 3.61 – 3.52 (m, 1H), 3.44 (ddd,  $J = 12.6, 9.0, 3.6$  Hz, 1H), 2.69 (dt,  $J = 8.3, 4.2$  Hz, 1H), 2.29 (s, 3H), 2.14 (hept,  $J = 6.5$  Hz, 1H), 1.74 – 1.61 (m, 2H), 1.52 – 1.41 (m, 2H), 0.90 (t,  $J = 5.1$  Hz, 1H), 0.88 – 0.81 (m, 6H), 0.79 (dd,  $J = 8.3, 5.5$  Hz, 1H).  $^{13}\text{C}$  NMR (126 MHz,  $\text{DMSO-}d_6$ )  $\delta$  179.4, 167.9, 163.8, 146.4, 132.5, 116.6, 106.1, 84.9, 59.3, 51.2, 51.0, 33.5, 33.3, 29.6, 28.4, 22.3, 20.1, 20.0, 19.2, 16.5. LC/MS (CI):  $m/z = 399$   $[\text{M}+\text{H}]^+$ . Anal. calcd. for  $\text{C}_{20}\text{H}_{26}\text{N}_6\text{O}_3$ : C 60.28; H 6.58; N 21.09; S 8.04. Found: C 60.10; H 6.71; N 21.17; S 8.35.

**2-(Benzo[d]isoxazol-3-yl)-*N*-(2-((6-cyanopyridin-3-yl)(methyl)amino)ethyl)-*N*-methylacetamide (12{2,23,11})**

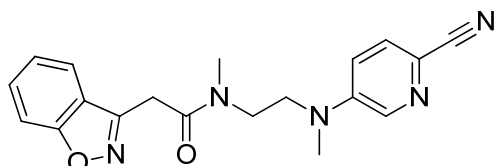

Brownish solid. The compound existed as a ca. 3:1 mixture of rotamers.  $^1\text{H}$  NMR (500 MHz,  $\text{DMSO-}d_6$ )  $\delta$  8.27 (d,  $J = 2.9$  Hz, 0.25H) and 8.18 (d,  $J = 2.9$  Hz, 0.75H), 7.78 – 7.47 (m, 4H), 7.38 – 7.28 (m, 1H), 7.18 (dd,  $J = 9.0, 3.0$  Hz, 0.25H) and 7.08 (dd,  $J = 9.0, 3.0$  Hz, 0.75H), 4.10 (s, 2H), 3.77 (t,  $J = 6.3$  Hz, 0.5H) and 3.66 (t,  $J = 6.3$  Hz, 0.5H) and 3.58 (t,  $J = 6.5$  Hz, 1.5H)

and 3.48 (t,  $J = 6.5$  Hz, 1.5H), 3.14 (s, 2.25H) and 3.06 (s, 0.75H), 2.98 (s, 2.25H) and 2.89 (s, 0.75H).  $^{13}\text{C}$  NMR (126 MHz,  $\text{DMSO-}d_6$ )  $\delta$  168.3 and 167.5, 162.6, 155.0 and 154.8, 147.1 and 146.9, 136.0 and 135.8, 130.5, 129.8 and 129.6, 123.9 and 123.8, 123.1, 122.2 and 122.1, 119.5 and 119.4, 118.3 and 117.8, 117.4 and 117.0, 109.9, 49.4 and 48.4, 47.1 and 45.0, 38.5 and 38.1, 36.6 and 34.1, 30.6 and 30.1. LC/MS (CI):  $m/z = 350$   $[\text{M}+\text{H}]^+$ . Anal. calcd. for  $\text{C}_{19}\text{H}_{19}\text{N}_5\text{O}_2$ : C 65.32; H 5.48; N 20.04. Found: C 65.53; H 5.42; N 20.16.

**General procedure for the reaction sequence C.** *N*-Boc-diamine **1** (0.5 mmol), carboxylic acid **4** (0.6 mmol), *i*-Pr<sub>2</sub>NEt (1.25 mmol\*), and HATU (0.575 mmol) were mixed in dry DMSO (appr. 1.4 mL). The reaction mixture was sealed and left at ambient temperature for 16 h, then evaporated under reduced pressure. Then the cleavage cocktail containing trifluoroacetic acid, triisopropylsilane, and water (93:5:2) (appr. 2 mL) was added in one portion. The mixture was stirred at ambient temperature for 6 h and evaporated under reduced pressure. The residue was taken up in DMF (appr. 2 mL). Alkylating agent **7** (0.6 mmol) and *i*-PrNEt<sub>2</sub> (3 mmol\*) were added in one portion, the reaction mixture was sealed and heated at 80 °C for 16 h, then cooled and evaporated under reduced pressure. The residue was dissolved in DMSO (appr. 1 mL), filtered, analyzed by LCMS, and transferred for the HPLC purification.

**3-Methyl-*N*-((1-((1-methyl-1*H*-benzo[*d*]imidazol-2-yl)methyl)pyrrolidin-3-yl)methyl)butanamide (13{125,197,36}).**

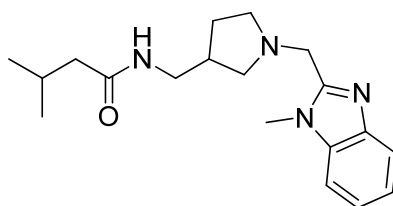

Brownish oil.  $^1\text{H}$  NMR (600 MHz,  $\text{DMSO-}d_6$ )  $\delta$  7.76 (t,  $J = 5.7$  Hz, 1H), 7.53 (d,  $J = 7.9$  Hz, 1H), 7.47 (d,  $J = 7.9$  Hz, 1H), 7.19 (t,  $J = 7.5$  Hz, 1H), 7.13 (t,  $J = 7.5$  Hz, 1H), 3.81 (d,  $J = 2.5$  Hz, 2H), 3.79 (s, 3H), 3.02 – 2.93 (m, 2H), 2.57 – 2.50 (m, 2H), 2.46 – 2.42 (m, 1H), 2.26 – 2.18 (m, 2H), 1.91 – 1.85 (m, 3H), 1.84 – 1.77 (m, 1H), 1.39 – 1.32 (m, 1H), 0.79 (d,  $J = 6.3$  Hz, 3H), 0.77 (d,  $J = 6.3$  Hz, 3H).  $^{13}\text{C}$  NMR (151 MHz,  $\text{DMSO-}d_6$ )  $\delta$  171.8, 152.6, 142.3, 136.5, 122.3, 121.6, 119.1, 110.2, 58.0, 53.8, 52.4, 45.2, 43.3, 37.6, 30.2, 28.4, 25.9, 22.7, 22.6. LC/MS (CI):  $m/z = 329$   $[\text{M}+\text{H}]^+$ . Anal. calcd. for  $\text{C}_{19}\text{H}_{28}\text{N}_4\text{O}$ : C 69.48; H 8.59; N 17.06. Found: C 69.29; H 8.87; N 17.07.

***N*-((4-((3-Chloropyridin-4-yl)methyl)morpholin-2-yl)methyl)-1-methyl-1*H*-pyrazole-3-carboxamide (13{74,107,20}).**

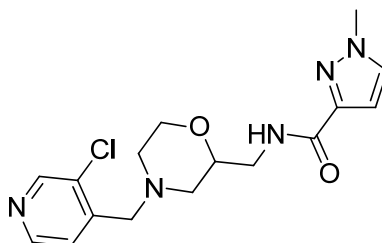

Yellowish oil.  $^1\text{H}$  NMR (500 MHz,  $\text{DMSO-}d_6$ )  $\delta$  8.55 (s, 1H), 8.46 (d,  $J = 4.9$  Hz, 1H), 7.93 (t,  $J = 6.0$  Hz, 1H), 7.73 (d,  $J = 2.3$  Hz, 1H), 7.50 (d,  $J = 4.9$  Hz, 1H), 6.58 (dt,  $J = 2.3, 1.0$  Hz, 1H), 3.86 (s, 3H), 3.79 (d,  $J = 11.3$  Hz, 1H), 3.64 – 3.59 (m, 1H), 3.57 (s, 2H), 3.50 (td,  $J = 11.3, 2.5$  Hz, 1H), 3.26 (t,  $J = 5.7$  Hz, 2H), 2.73 (d,  $J = 11.3$  Hz, 1H), 2.59 (d,  $J = 11.3$  Hz, 1H), 2.17 (td,  $J = 11.3, 3.2$  Hz, 1H), 1.95 (t,  $J = 10.5$  Hz, 1H).  $^{13}\text{C}$  NMR (126 MHz,  $\text{DMSO-}d_6$ )  $\delta$  161.8, 149.2,

148.5, 146.5, 145.0, 133.0, 131.6, 125.2, 106.4, 74.5, 66.2, 58.2, 56.6, 53.1, 41.5, 39.4. LC/MS (CI):  $m/z = 350/352$   $[M+H]^+$ . Anal. calcd. for  $C_{16}H_{20}ClN_5O_2$ : C 54.94; H 5.76; N 20.02; Cl 10.13. Found: C 54.60; H 6.14; N 20.35; Cl 9.80.

***N*-((4-(2,5-Dimethylbenzyl)morpholin-2-yl)methyl)-1-methyl-1*H*-pyrazole-3-carboxamide (13{74,107,21}).**

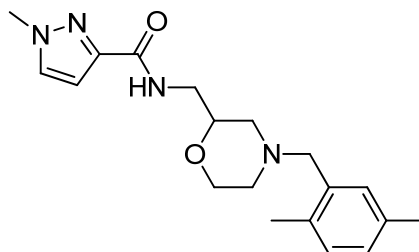

Yellowish oil.  $^1H$  NMR (500 MHz,  $DMSO-d_6$ )  $\delta$  7.90 (t,  $J = 6.0$  Hz, 1H), 7.73 (d,  $J = 2.2$  Hz, 1H), 7.06 – 6.96 (m, 2H), 6.92 (d,  $J = 7.7$  Hz, 1H), 6.57 (d,  $J = 2.2$  Hz, 1H), 3.86 (s, 3H), 3.75 (d,  $J = 11.3$  Hz, 1H), 3.57 – 3.50 (m, 1H), 3.47 – 3.33 (m, 3H), 3.24 (t,  $J = 6.2$  Hz, 2H), 2.68 (d,  $J = 11.3$  Hz, 1H), 2.55 – 2.50 (m, 1H), 2.23 (s, 3H), 2.20 (s, 3H), 2.04 (td,  $J = 11.3, 3.1$  Hz, 1H), 1.82 (t,  $J = 10.6$  Hz, 1H).  $^{13}C$  NMR (126 MHz,  $DMSO-d_6$ )  $\delta$  161.8, 146.5, 136.0, 134.6, 134.4, 133.0, 130.9, 130.5, 128.0, 106.4, 74.6, 66.3, 61.0, 56.8, 53.2, 41.6, 39.3, 21.1, 18.9. LC/MS (CI):  $m/z = 343$   $[M+H]^+$ . Anal. calcd. for  $C_{19}H_{26}N_4O_2$ : C 66.64; H 7.65; N 16.36. Found: C 67.03; H 7.45; N 16.05.

***N*-(2-(Benzyl(2-methoxyethyl)amino)ethyl)-2-fluoro-2-phenylacetamide (13{107,152,23}).**

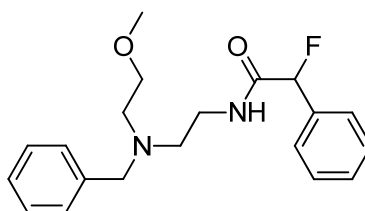

Yellowish oil.  $^1H$  NMR (500 MHz,  $DMSO-d_6$ )  $\delta$  8.23 (t,  $J = 5.7$  Hz, 1H), 7.46 – 7.41 (m, 2H), 7.41 – 7.35 (m, 3H), 7.32 – 7.23 (m, 4H), 7.23 – 7.18 (m, 1H), 5.84 (d,  $J = 47.8$  Hz, 1H), 3.59 (s, 2H), 3.33 (t,  $J = 5.8$  Hz, 2H), 3.28 – 3.20 (m, 2H), 3.17 (s, 3H), 2.64 – 2.52 (m, 4H).  $^{13}C$  NMR (126 MHz,  $DMSO-d_6$ )  $\delta$  168.0 (d,  $J = 23.0$  Hz), 139.9, 136.3 (d,  $J = 19.4$  Hz), 129.6 (d,  $J = 2.4$  Hz), 129.0, 128.9, 128.5, 127.4 (d,  $J = 5.9$  Hz), 127.2, 91.4 (d,  $J = 183$  Hz), 70.9, 58.8, 58.5, 53.2, 52.7, 36.9.  $^{19}F$  NMR (376 MHz,  $DMSO-d_6$ )  $\delta$  -175.2. LC/MS (CI):  $m/z = 345$   $[M+H]^+$ . Anal. calcd. for  $C_{20}H_{25}FN_2O_2$ : C 69.74; H 7.32; N 8.13. Found: C 69.47; H 7.39; N 8.50.

***N*-((4-((2,5-Dimethylthiophen-3-yl)methyl)morpholin-2-yl)methyl)-1-methyl-1*H*-pyrazole-3-carboxamide (13{74,107,27}).**

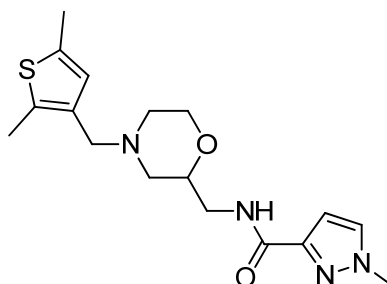

Yellowish oil.  $^1\text{H}$  NMR (500 MHz,  $\text{DMSO-}d_6$ )  $\delta$  7.91 (t,  $J = 6.1$  Hz, 1H), 7.74 (d,  $J = 2.5$  Hz, 1H), 6.64 – 6.54 (m, 1H), 6.53 (s, 1H), 3.87 (s, 3H), 3.74 (d,  $J = 11.3$  Hz, 1H), 3.51 (ddt,  $J = 8.7, 6.2, 3.7$  Hz, 1H), 3.41 (td,  $J = 11.3, 2.5$  Hz, 1H), 3.28 – 3.20 (m, 4H), 2.67 (d,  $J = 11.3$  Hz, 1H), 2.53 (d,  $J = 11.3$  Hz, 1H), 2.29 (s, 3H), 2.24 (s, 3H), 1.98 (td,  $J = 11.3, 3.2$  Hz, 1H), 1.76 (t,  $J = 10.6$  Hz, 1H).  $^{13}\text{C}$  NMR (126 MHz,  $\text{DMSO-}d_6$ )  $\delta$  161.8, 146.5, 134.6, 133.8, 133.3, 133.0, 128.4, 106.4, 74.5, 66.3, 56.5, 55.4, 52.9, 41.6, 39.4, 15.2, 13.1. LC/MS (CI):  $m/z = 349$   $[\text{M}+\text{H}]^+$ . Anal. calcd. for  $\text{C}_{17}\text{H}_{24}\text{N}_4\text{O}_2\text{S}$ : C 58.6; H 6.94; N 16.08; S 9.20. Found: C 58.40; H 7.17; N 16.13; S 9.47.

**(3-Chloro-1H-indol-2-yl)(3-(((5-ethyl-1,3,4-oxadiazol-2-yl)methyl)(methyl)amino)methyl)-pyrrolidin-1-yl)methanone (13{44, 129, 33})**

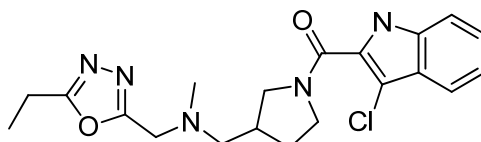

Yellowish oil. The compound existed as a ca. 11:9 mixture of rotamers.  $^1\text{H}$  NMR (500 MHz,  $\text{DMSO-}d_6$ )  $\delta$  11.83 (s, 1H), 7.52 (d,  $J = 8.0$  Hz, 1H), 7.44 – 7.36 (m, 1H), 7.25 (t,  $J = 7.7$  Hz, 1H), 7.17 – 7.10 (m, 1H), 3.82 (s, 0.95H) and 3.72 (s, 1.1H), 3.65 – 3.46 (m, 3H), 3.27 – 3.20 (m, 1H), 2.83 (q,  $J = 7.7$  Hz, 0.9H) and 2.71 (q,  $J = 7.7$  Hz, 1.1H), 2.47 – 2.29 (m, 3H), 2.27 (s, 1.35H) and 2.17 (s, 1.65H), 2.04 – 1.91 (m, 1H), 1.63 – 1.54 (m, 1H), 1.24 (t,  $J = 7.7$  Hz, 1.35H) and 1.15 (t,  $J = 7.7$  Hz, 1.65H).  $^{13}\text{C}$  NMR (126 MHz,  $\text{DMSO-}d_6$ )  $\delta$  168.4 and 168.3, 164.1 and 164.0, 161.0 and 160.9, 134.8, 129.2 and 129.1, 124.8, 124.4, 121.0, 118.4, 112.9, 103.2 and 103.1, 59.3 and 58.8, 52.1 and 51.0, 50.9 and 50.4, 47.2 and 45.6, 42.5, 37.1 and 35.4, 29.9 and 28.2, 18.8 and 18.7, 10.9 and 10.8. LC/MS (CI):  $m/z = 402/404$   $[\text{M}+\text{H}]^+$ . Anal. calcd. for  $\text{C}_{20}\text{H}_{24}\text{ClN}_5\text{O}_2$ : C 59.77; H 6.02; N 17.43; Cl 8.82. Found: C 59.95; H 5.71; N 17.12; Cl 8.47.

**(3-Chloro-1H-indol-2-yl)(4-(2-(4-chloro-1H-pyrazol-1-yl)ethyl)-1,4-diazepan-1-yl)methanone (13{23, 129, 34})**

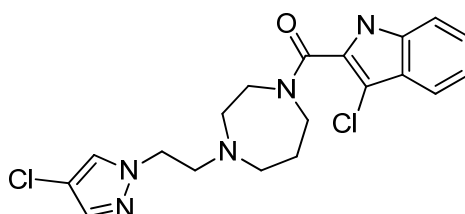

Yellowish oil. The compound existed as a ca. 1:1 mixture of rotamers.  $^1\text{H}$  NMR (500 MHz,  $\text{DMSO-}d_6$ )  $\delta$  11.88 (s, 1H), 7.97 (s, 0.5H) and 7.87 (s, 0.5H) and 7.61 – 7.41 (m, 2H), 7.40 (d,  $J = 8.2$  Hz, 1H), 7.24 (t,  $J = 7.6$  Hz, 1H), 7.14 (t,  $J = 7.6$  Hz, 1H), 4.16 (t,  $J = 6.5$  Hz, 1H) and 4.08 (t,  $J = 6.5$  Hz, 1H), 3.68 – 3.55 (m, 2H), 3.54 – 3.43 (m, 2H), 2.86 (t,  $J = 6.5$  Hz, 1H) and 2.84 – 2.73 (m, 2H) and 2.71 – 2.62 (m, 2H) and 2.62 – 2.55 (m, 1H), 1.86 – 1.77 (m, 1H) and 1.70 – 1.60 (m, 1H).  $^{13}\text{C}$  NMR (126 MHz,  $\text{DMSO-}d_6$ )  $\delta$  162.6, 137.1, 134.8, 128.9, 128.8, 128.8, 124.6, 124.1, 120.9, 118.2, 112.9, 108.0, 56.3 and 55.7, 55.2 and 55.0, 53.9 and 53.8, 50.7, 49.3 and 47.6, 45.9 and 44.9, 28.5 and 26.7. LC/MS (CI):  $m/z = 406/408$   $[\text{M}+\text{H}]^+$ . Anal. calcd. for  $\text{C}_{19}\text{H}_{21}\text{Cl}_2\text{N}_5\text{O}$ : C 56.17; H 5.21; N 17.24; Cl 17.45. Found: C 56.21; H 5.58; N 17.12; Cl 17.35.

**N-((4-((2,5-Dimethylthiazol-4-yl)methyl)morpholin-2-yl)methyl)-1-methyl-1H-pyrazole-3-carboxamide (13{74, 107, 35})**

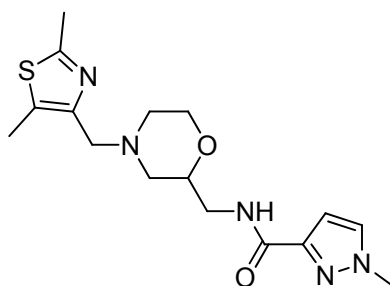

Brownish oil.  $^1\text{H}$  NMR (500 MHz,  $\text{DMSO-}d_6$ )  $\delta$  7.91 (t,  $J = 5.3$  Hz, 1H), 7.74 (t,  $J = 2.3$  Hz, 1H), 6.58 (q,  $J = 2.3$  Hz, 1H), 3.87 (s, 3H), 3.76 – 3.71 (m, 1H), 3.55 – 3.48 (m, 1H), 3.45 – 3.35 (m, 4H), 3.26 – 3.19 (m, 2H), 2.72 – 2.66 (m, 1H), 2.60 – 2.54 (m, 1H), 2.49 – 2.46 (m, 2H), 2.31 (s, 3H), 2.07 (t,  $J = 11.0$  Hz, 1H), 1.83 (t,  $J = 10.3$  Hz, 1H).  $^{13}\text{C}$  NMR (126 MHz,  $\text{DMSO-}d_6$ )  $\delta$  161.8, 160.9, 147.7, 146.6, 133.0, 130.1, 106.4, 74.5, 66.3, 56.4, 55.5, 52.9, 41.6, 39.4, 19.0, 11.4. LC/MS (CI):  $m/z = 350$   $[\text{M}+\text{H}]^+$ . Anal. calcd. for  $\text{C}_{16}\text{H}_{23}\text{N}_5\text{O}_2\text{S}$ : C 54.99; H 6.63; N 20.04; S 9.17. Found: C 55.01; H 6.41; N 19.89; S 9.53.

***N*-((1-(2-Ethylbenzyl)piperidin-3-yl)methyl)-1-methyl-1*H*-pyrazole-3-carboxamide (13{102,107,29})**

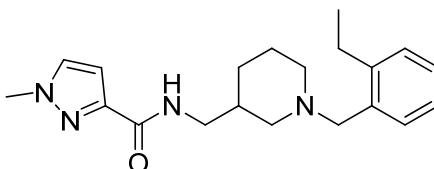

Yellowish oil.  $^1\text{H}$  NMR (500 MHz,  $\text{DMSO-}d_6$ )  $\delta$  8.01 (t,  $J = 6.2$  Hz, 1H), 7.72 (d,  $J = 2.2$  Hz, 1H), 7.19 (d,  $J = 7.5$  Hz, 1H), 7.17 – 7.10 (m, 2H), 7.07 (td,  $J = 6.9, 2.5$  Hz, 1H), 6.55 (d,  $J = 1.7$  Hz, 1H), 3.95 – 3.77 (m, 3H), 3.44 – 3.34 (m, 2H), 3.13 – 3.02 (m, 2H), 2.75 – 2.67 (m, 1H), 2.64 (q,  $J = 7.5$  Hz, 2H), 2.60 – 2.53 (m, 1H), 1.90 (t,  $J = 10.9$  Hz, 1H), 1.80 – 1.70 (m, 2H), 1.64 – 1.54 (m, 2H), 1.38 – 1.29 (m, 1H), 1.12 (t,  $J = 7.5$  Hz, 3H), 0.98 – 0.88 (m, 1H).  $^{13}\text{C}$  NMR (126 MHz,  $\text{DMSO-}d_6$ )  $\delta$  161.8, 146.9, 143.4, 136.5, 132.9, 130.2, 128.8, 127.5, 125.7, 106.3, 60.9, 58.5, 54.2, 42.6, 39.3, 36.8, 28.6, 25.2, 24.9, 15.8. LC/MS (CI):  $m/z = 341$   $[\text{M}+\text{H}]^+$ . Anal. calcd. for  $\text{C}_{20}\text{H}_{28}\text{N}_4\text{O}$ : C 70.56; H 8.29; N 16.46. Found: C 70.80; H 7.94; N 16.15.

**1-Methyl-*N*-((4-((4-methyl-1,2,5-oxadiazol-3-yl)methyl)morpholin-2-yl)methyl)-1*H*-pyrazole-3-carboxamide (13{74,107,38})**

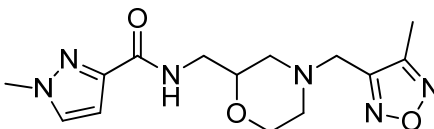

Yellowish oil.  $^1\text{H}$  NMR (500 MHz,  $\text{DMSO-}d_6$ )  $\delta$  7.95 (t,  $J = 6.0$  Hz, 1H), 7.74 (d,  $J = 1.8$  Hz, 1H), 6.57 (d,  $J = 1.8$  Hz, 1H), 3.87 (s, 3H), 3.79 – 3.72 (m, 1H), 3.70 (s, 2H), 3.59 – 3.49 (m, 1H), 3.43 (td,  $J = 11.4, 2.1$  Hz, 1H), 3.25 (t,  $J = 6.1$  Hz, 2H), 2.74 – 2.63 (m, 1H), 2.58 – 2.51 (m, 1H), 2.36 (s, 3H), 2.14 (td,  $J = 11.2, 3.2$  Hz, 1H), 1.92 (t,  $J = 10.5$  Hz, 1H).  $^{13}\text{C}$  NMR (151 MHz,  $\text{DMSO-}d_6$ )  $\delta$  161.7, 152.4, 152.4, 146.4, 133.0, 106.4, 74.4, 66.1, 56.2, 52.7, 50.0, 41.3, 39.3, 8.4. LC/MS (CI):  $m/z = 321$   $[\text{M}+\text{H}]^+$ . Anal. calcd. for  $\text{C}_{14}\text{H}_{20}\text{N}_6\text{O}_3$ : C 52.49; H 6.29; N 26.23. Found: C 52.83; H 6.22; N 26.56.

**2-(1-Ethyl-1*H*-pyrazol-4-yl)-*N*-(2-(2-oxo-2-(*o*-tolylamino)ethyl)-2-azabicyclo[2.1.1]hexan-5-yl)acetamide (13{7,7,1})**

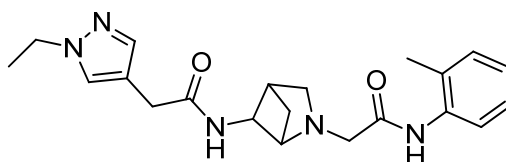

Yellowish oil.  $^1\text{H}$  NMR (500 MHz,  $\text{DMSO-}d_6$ )  $\delta$  9.58 (s, 1H), 7.94 (d,  $J = 7.6$  Hz, 1H), 7.55 (d,  $J = 7.9$  Hz, 1H), 7.50 (s, 1H), 7.36 – 7.21 (m, 2H), 7.19 (t,  $J = 7.6$  Hz, 1H), 7.09 (t,  $J = 7.4$  Hz, 1H), 4.03 (q,  $J = 7.3$  Hz, 2H), 3.85 – 3.77 (m, 1H), 3.46 – 3.39 (m, 2H), 3.31 – 3.24 (m, 3H), 3.12 (d,  $J = 8.4$  Hz, 1H), 2.68 – 2.61 (m, 1H), 2.34 (d,  $J = 8.4$  Hz, 1H), 2.20 (s, 3H), 1.31 (t,  $J = 7.3$  Hz, 3H), 1.28 (s, 2H).  $^{13}\text{C}$  NMR (126 MHz,  $\text{DMSO-}d_6$ )  $\delta$  170.8, 169.4, 138.6, 136.5, 131.8, 130.7, 128.4, 126.6, 125.6, 125.0, 114.8, 66.1, 58.9, 52.9, 52.6, 46.4, 43.1, 31.5, 28.7, 18.1, 16.0. LC/MS (CI):  $m/z = 382$   $[\text{M}+\text{H}]^+$ . Anal. calcd. for  $\text{C}_{21}\text{H}_{27}\text{N}_5\text{O}_2$ : C 66.12; H 7.13; N 18.36. Found: C 66.18; H 6.91; N 18.38.

**(S)-N<sup>4</sup>-(1-(3-(Methylcarbamoyl)benzyl)piperidin-3-yl)furan-2,4-dicarboxamide (13{139,243,50})**

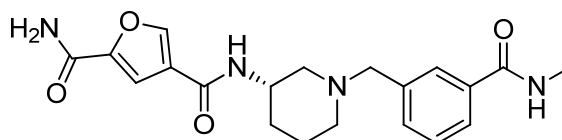

Yellowish solid.  $^1\text{H}$  NMR (500 MHz,  $\text{DMSO-}d_6$ )  $\delta$  8.39 (q,  $J = 4.4$  Hz, 1H), 8.24 (s, 1H), 8.01 (d,  $J = 7.9$  Hz, 1H), 7.85 (s, 1H), 7.74 (s, 1H), 7.71 – 7.66 (m, 1H), 7.46 (s, 1H), 7.44 – 7.39 (m, 2H), 7.37 (t,  $J = 7.5$  Hz, 1H), 3.91 – 3.82 (m, 1H), 3.51 (s, 2H), 2.84 – 2.78 (m, 1H), 2.76 (d,  $J = 4.4$  Hz, 3H), 2.70 – 2.65 (m, 1H), 1.90 (t,  $J = 10.7$  Hz, 1H), 1.83 (t,  $J = 10.2$  Hz, 1H), 1.80 – 1.74 (m, 1H), 1.70 – 1.62 (m, 1H), 1.54 – 1.45 (m, 1H), 1.25 (qd,  $J = 11.9, 4.0$  Hz, 1H).  $^{13}\text{C}$  NMR (126 MHz,  $\text{DMSO-}d_6$ )  $\delta$  167.1, 160.7, 159.4, 148.8, 146.8, 138.8, 134.9, 131.9, 128.5, 128.0, 126.1, 124.6, 112.8, 62.3, 58.5, 53.2, 46.4, 30.3, 26.7, 24.3. LC/MS (CI):  $m/z = 385$   $[\text{M}+\text{H}]^+$ . Anal. calcd. for  $\text{C}_{20}\text{H}_{24}\text{N}_4\text{O}_4$ : C 62.49; H 6.29; N 14.57. Found: C 62.30; H 5.97; N 14.95.

**N-(1-(2-((3-Chloro-2-methylphenyl)amino)-2-oxoethyl)piperidin-4-yl)-2-methylpentanamide (13{79,95,11})**

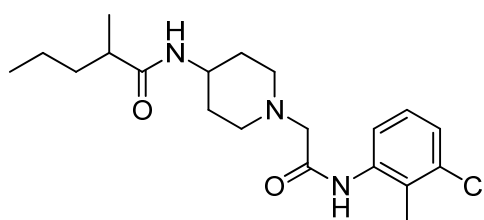

Beige solid.  $^1\text{H}$  NMR (500 MHz,  $\text{DMSO-}d_6$ )  $\delta$  9.53 (s, 1H), 7.75 – 7.58 (m, 2H), 7.28 – 7.12 (m, 2H), 3.59 – 3.49 (m, 1H), 3.10 (s, 2H), 2.91 – 2.74 (m, 2H), 2.42 – 2.04 (m, 6H), 1.81 – 1.63 (m, 2H), 1.58 – 1.36 (m, 3H), 1.30 – 1.09 (m, 3H), 0.94 (d,  $J = 6.7$  Hz, 3H), 0.83 (t,  $J = 6.8$  Hz, 3H).  $^{13}\text{C}$  NMR (126 MHz,  $\text{DMSO-}d_6$ )  $\delta$  175.3, 168.9, 138.1, 134.0, 128.1, 127.5, 125.6, 122.3, 62.1, 52.8, 45.6, 39.7, 36.6, 32.3, 20.5, 18.4, 14.9, 14.4. LC/MS (CI):  $m/z = 380$   $[\text{M}+\text{H}]^+$ . Anal. calcd. for  $\text{C}_{20}\text{H}_{30}\text{ClN}_3\text{O}_2$ : C 63.23; H 7.96; N 11.06; Cl 9.33. Found: C 63.4; H 7.92; N 10.70; Cl 8.97.

**N-((4-(2,4-Dimethylbenzyl)morpholin-2-yl)methyl)-1-methyl-1H-pyrazole-3-carboxamide (13{74,107,12})**

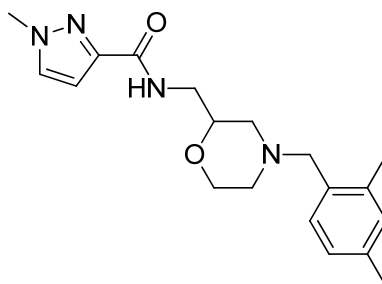

Yellowish oil.  $^1\text{H}$  NMR (500 MHz,  $\text{DMSO-}d_6$ )  $\delta$  7.91 (t,  $J = 6.0$  Hz, 1H), 7.73 (d,  $J = 2.2$  Hz, 1H), 7.05 (d,  $J = 7.6$  Hz, 1H), 6.93 (s, 1H), 6.91 – 6.87 (m, 1H), 6.63 – 6.50 (m, 1H), 3.86 (d,  $J = 1.0$  Hz, 3H), 3.77 – 3.72 (m, 1H), 3.54 – 3.49 (m, 1H), 3.40 (td,  $J = 11.2, 2.5$  Hz, 1H), 3.36 – 3.33 (m, 2H), 3.23 (td,  $J = 6.2, 2.5$  Hz, 2H), 2.66 (d,  $J = 11.2$  Hz, 1H), 2.51 (d,  $J = 3.2$  Hz, 1H), 2.20 (s, 3H), 2.02 (td,  $J = 11.3, 3.2$  Hz, 1H), 1.80 (t,  $J = 10.6$  Hz, 1H).  $^{13}\text{C}$  NMR (151 MHz,  $\text{DMSO-}d_6$ )  $\delta$  161.7, 146.5, 137.4, 136.4, 133.2, 133.0, 131.3, 130.2, 126.3, 106.3, 74.5, 66.3, 60.7, 56.7, 53.1, 41.5, 39.3, 21.0, 19.2. LC/MS (CI):  $m/z = 343$   $[\text{M}+\text{H}]^+$ . Anal. calcd. for  $\text{C}_{19}\text{H}_{26}\text{N}_4\text{O}_2$ : C 66.64; H 7.65; N 16.36. Found: C 66.76; H 7.99; N 16.46.

***N*-(4-(2-Fluorobenzyl)morpholin-2-yl)methyl-1-methyl-1H-pyrazole-3-carboxamide (13{74,107,25})**

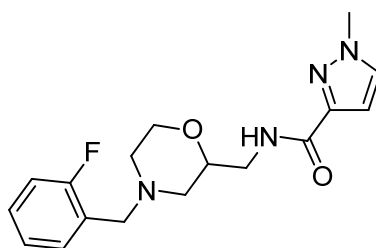

Brownish solid.  $^1\text{H}$  NMR (500 MHz,  $\text{DMSO-}d_6$ )  $\delta$  7.91 (t,  $J = 6.0$  Hz, 1H), 7.73 (d,  $J = 2.2$  Hz, 1H), 7.38 (td,  $J = 7.7, 1.8$  Hz, 1H), 7.33 – 7.25 (m, 1H), 7.19 – 7.08 (m, 2H), 6.66 – 6.53 (m, 1H), 3.86 (s, 3H), 3.79 – 3.70 (m, 1H), 3.61 – 3.37 (m, 4H), 3.23 (td,  $J = 6.2, 2.3$  Hz, 2H), 2.71 (d,  $J = 11.3$  Hz, 1H), 2.56 (d,  $J = 11.3$  Hz, 1H), 2.06 (td,  $J = 11.3, 3.2$  Hz, 1H), 1.84 (t,  $J = 10.6$  Hz, 1H).  $^{13}\text{C}$  NMR (126 MHz,  $\text{DMSO-}d_6$ )  $\delta$  161.7, 161.2 (d,  $J = 245$  Hz), 146.5, 133.0, 132.0 (d,  $J = 4.6$  Hz), 129.6 (d,  $J = 8.3$  Hz), 124.6 (d,  $J = 14.5$  Hz), 124.6 (d,  $J = 3.4$  Hz), 115.6 (d,  $J = 21.9$  Hz), 106.3, 74.5, 66.2, 56.4, 55.3, 52.8, 41.5, 39.3.  $^{19}\text{F}$  NMR (376 MHz,  $\text{DMSO-}d_6$ )  $\delta$  – 118.6. LC/MS (CI):  $m/z = 333$   $[\text{M}+\text{H}]^+$ . Anal. calcd. for  $\text{C}_{17}\text{H}_{21}\text{FN}_4\text{O}_2$ : C 61.43; H 6.37; N 16.86. Found: C 61.60; H 6.62; N 16.65.

**General procedure for the reaction sequence D.** *N*-Boc-diamine **1** (0.5 mmol), aryll halide **6** (0.6 mmol), and *i*-Pr<sub>2</sub>NEt (1.25 mmol\*), were mixed in dry NMP (appr. 2 mL). The reaction mixture was sealed and heated at 100 °C for 16 h, then evaporated under reduced pressure. Then the cleavage cocktail containing trifluoroacetic acid, triisopropylsilane, and water (93:5:2) (appr. 2 mL) was added in one portion. The mixture was stirred at ambient temperature for 6 h and evaporated under reduced pressure. The residue was taken up in DMSO (appr. 1.4 mL). Carboxylic acid **5** (0.6 mmol), *i*-PrNEt<sub>2</sub> (3 mmol\*), and HATU (0.6 mmol) were added in one portion, the reaction mixture was sealed and left at ambient temperature for 16 h, then cooled and evaporated under reduced pressure. The residue was dissolved in DMSO (appr. 1 mL), filtered, analyzed by LCMS, and transferred for the HPLC purification.

***rac*-1-Methyl-*N*-(((3*aR*,6*aS*)-2-(tetrazolo[1,5-*b*]pyridazin-6-yl)hexahydrocyclopenta[*c*]pyrrol-3*a*(1*H*)-yl)methyl)cyclopentane-1-carboxamide (14{19,35,360})**

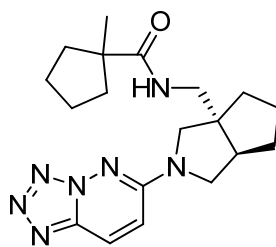

Brownish solid.  $^1\text{H}$  NMR (600 MHz,  $\text{DMSO-}d_6$ )  $\delta$  8.32 (d,  $J = 9.9$  Hz, 1H), 7.62 (t,  $J = 6.3$  Hz, 1H), 7.32 (d,  $J = 9.9$  Hz, 1H), 3.79 – 3.70 (m, 1H), 3.66 (d,  $J = 11.6$  Hz, 1H), 3.32 – 3.26 (m, 3H), 3.12 (dd,  $J = 13.5, 5.9$  Hz, 1H), 2.55 – 2.50 (m, 1H), 1.95 – 1.84 (m, 3H), 1.73 – 1.55 (m, 4H), 1.54 – 1.39 (m, 5H), 1.38 – 1.22 (m, 2H), 1.08 (s, 3H).  $^{13}\text{C}$  NMR (151 MHz,  $\text{DMSO-}d_6$ )  $\delta$  178.3, 154.5, 140.0, 123.6, 119.3, 56.5, 55.8, 53.8, 50.1, 45.6, 45.2, 37.5, 37.4, 35.2, 32.2, 25.6, 24.5, 24.5. LC/MS (CI):  $m/z = 370$   $[\text{M}+\text{H}]^+$ . Anal. calcd. for  $\text{C}_{19}\text{H}_{27}\text{N}_7\text{O}$ : C 61.77; H 7.37; N 26.54. Found: C 62.11; H 7.24; N 26.69.

***rac-N-(((3aR,6aS)-2-(Tetrazolo[1,5-*b*]pyridazin-6-yl)hexahydrocyclopenta[*c*]pyrrol-3a(1H)-yl)methyl)-3,6-dihydro-2H-pyran-4-carboxamide (14{19,35,361})***

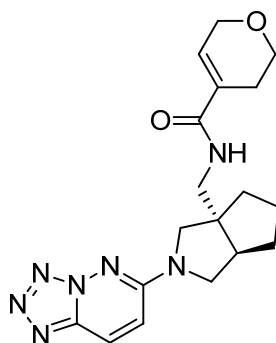

Brownish oil.  $^1\text{H}$  NMR (500 MHz,  $\text{DMSO-}d_6$ )  $\delta$  8.34 (d,  $J = 9.9$  Hz, 1H), 7.99 (t,  $J = 6.2$  Hz, 1H), 7.35 (d,  $J = 9.7$  Hz, 1H), 6.51 (s, 1H), 4.18 – 4.03 (m, 2H), 3.78 (t,  $J = 9.8$  Hz, 1H), 3.70 – 3.59 (m, 3H), 3.48 – 3.37 (m, 2H), 3.25 (dd,  $J = 13.5, 6.0$  Hz, 1H), 2.57 – 2.51 (m, 2H), 2.25 – 2.14 (m, 2H), 1.95 – 1.84 (m, 1H), 1.77 – 1.60 (m, 4H), 1.56 – 1.49 (m, 1H).  $^{13}\text{C}$  NMR (126 MHz,  $\text{DMSO-}d_6$ )  $\delta$  167.4, 154.6, 140.0, 131.3, 131.1, 123.7, 119.3, 64.7, 63.6, 56.5, 55.8, 53.7, 45.7, 45.0, 35.1, 31.9, 24.8, 24.4. LC/MS (CI):  $m/z = 370$   $[\text{M}+\text{H}]^+$ . Anal. calcd. for  $\text{C}_{18}\text{H}_{23}\text{N}_7\text{O}_2$ : C 58.52; H 6.28; N 26.54. Found: C 58.61; H 6.13; N 26.42.

***rac-N-(((3aR,6aS)-2-(Tetrazolo[1,5-*b*]pyridazin-6-yl)hexahydrocyclopenta[*c*]pyrrol-3a(1H)-yl)methyl)benzamide (14{19,35,367})***

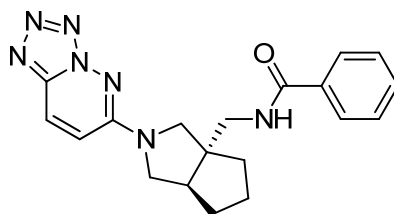

Yellowish solid.  $^1\text{H}$  NMR (600 MHz,  $\text{DMSO-}d_6$ )  $\delta$  8.58 (t,  $J = 6.3$  Hz, 1H), 8.30 (d,  $J = 9.8$  Hz, 1H), 7.87 – 7.71 (m, 2H), 7.46 (t,  $J = 7.4$  Hz, 1H), 7.39 (t,  $J = 7.4$  Hz, 2H), 7.32 (d,  $J = 10.1$  Hz, 1H), 3.84 – 3.76 (m, 1H), 3.74 (d,  $J = 11.6$  Hz, 1H), 3.49 – 3.35 (m, 4H), 2.59 (tt,  $J = 8.5, 4.8$  Hz, 1H), 1.96 – 1.88 (m, 1H), 1.86 – 1.72 (m, 2H), 1.71 – 1.59 (m, 2H), 1.56 – 1.48 (m, 1H).  $^{13}\text{C}$  NMR (151 MHz,  $\text{DMSO-}d_6$ )  $\delta$  167.5, 154.6, 140.0, 135.0, 131.6, 128.6, 127.7, 123.6, 119.3,



56.5, 55.8, 53.7, 45.7, 45.4, 35.2, 31.9, 24.4. LC/MS (CI):  $m/z = 364$   $[M+H]^+$ . Anal. calcd. for  $C_{19}H_{21}N_7O$ : C 62.79; H 5.82; N 26.98. Found: C 63.02; H 5.99; N 27.26.

***rac*-2-Cyclobutyl-2-methyl-*N*-(((3*aR*,6*aS*)-2-(tetrazolo[1,5-*b*]pyridazin-6-yl)hexahydrocyclopenta[*c*]pyrrol-3*a*(1*H*)-yl)methyl)propanamide (14{19,35,369})**

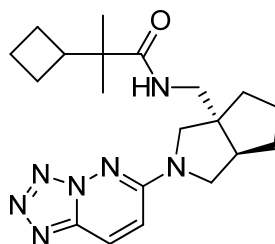

Brownish solid.  $^1H$  NMR (600 MHz,  $DMSO-d_6$ )  $\delta$  8.33 (d,  $J = 9.9$  Hz, 1H), 7.43 (t,  $J = 6.3$  Hz, 1H), 7.32 (d,  $J = 9.9$  Hz, 1H), 3.73 (dd,  $J = 11.1, 8.3$  Hz, 1H), 3.64 (d,  $J = 11.6$  Hz, 1H), 3.31 – 3.29 (m, 1H), 3.26 (dd,  $J = 13.5, 6.6$  Hz, 1H), 3.11 (dd,  $J = 13.5, 6.0$  Hz, 1H), 2.51 (td,  $J = 8.3, 4.2$  Hz, 1H), 2.44 (d,  $J = 8.9$  Hz, 1H), 1.91 – 1.83 (m, 1H), 1.83 – 1.50 (m, 10H), 1.51 – 1.26 (m, 2H), 0.93 (s, 3H), 0.92 (s, 3H).  $^{13}C$  NMR (151 MHz,  $DMSO-d_6$ )  $\delta$  177.1, 154.5, 140.0, 123.7, 119.2, 56.5, 55.8, 53.8, 45.5, 44.9, 43.7, 43.3, 35.2, 32.0, 24.4, 23.4, 23.3, 22.1, 22.1, 16.9. LC/MS (CI):  $m/z = 384$   $[M+H]^+$ . Anal. calcd. for  $C_{20}H_{29}N_7O$ : C 62.64; H 7.62; N 25.57. Found: C 62.93; H 7.43; N 25.31.

***rac*-1-Methyl-*N*-(((3*aR*,6*aS*)-2-(tetrazolo[1,5-*b*]pyridazin-6-yl)hexahydrocyclopenta[*c*]pyrrol-3*a*(1*H*)-yl)methyl)cyclohexane-1-carboxamide (14{19,35,373})**

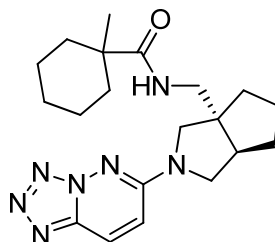

Brownish solid.  $^1H$  NMR (600 MHz,  $DMSO-d_6$ )  $\delta$  8.32 (d,  $J = 9.8$  Hz, 1H), 7.59 (t,  $J = 6.3$  Hz, 1H), 7.32 (d,  $J = 9.8$  Hz, 1H), 3.75 (t,  $J = 9.6$  Hz, 1H), 3.68 (d,  $J = 11.6$  Hz, 1H), 3.38 – 3.34 (m, 1H), 3.32 – 3.26 (m, 2H), 3.11 (dd,  $J = 13.5, 5.8$  Hz, 1H), 2.54 (tt,  $J = 8.5, 4.6$  Hz, 1H), 1.96 – 1.82 (m, 3H), 1.74 – 1.56 (m, 4H), 1.52 – 1.45 (m, 1H), 1.40 – 1.31 (m, 2H), 1.27 – 1.04 (m, 6H), 0.95 (s, 3H).  $^{13}C$  NMR (151 MHz,  $DMSO-d_6$ )  $\delta$  177.5, 154.5, 139.9, 123.7, 119.2, 56.6, 55.9, 53.8, 45.6, 45.1, 42.6, 35.5, 35.4, 32.2, 27.2, 25.8, 24.5, 23.1. LC/MS (CI):  $m/z = 384$   $[M+H]^+$ . Anal. calcd. for  $C_{20}H_{29}N_7O$ : C 62.64; H 7.62; N 25.57. Found: C 62.77; H 7.37; N 25.52.

***rac*-3,5-Dimethyl-*N*-(((3*aR*,6*aS*)-2-(tetrazolo[1,5-*b*]pyridazin-6-yl)octahydrocyclopenta[*c*]pyrrol-3*a*(1*H*)-yl)methyl)thiophene-2-carboxamide (14{19,35,375})**

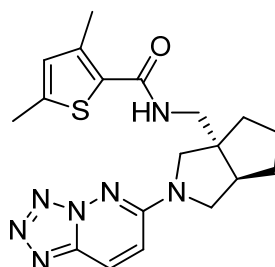

Brownish solid.  $^1\text{H}$  NMR (600 MHz,  $\text{DMSO-}d_6$ )  $\delta$  8.31 (d,  $J = 9.9$  Hz, 1H), 7.94 (t,  $J = 6.3$  Hz, 1H), 7.33 (d,  $J = 9.8$  Hz, 1H), 6.58 (s, 1H), 3.78 (dd,  $J = 11.2, 8.1$  Hz, 1H), 3.71 (d,  $J = 11.5$  Hz, 1H), 3.45 – 3.34 (m, 3H), 3.32 – 3.28 (m, 1H), 2.56 (tt,  $J = 8.4, 4.9$  Hz, 1H), 2.32 (s, 3H), 2.25 (s, 3H), 1.95 – 1.87 (m, 1H), 1.81 – 1.58 (m, 4H), 1.54 – 1.47 (m, 1H).  $^{13}\text{C}$  NMR (151 MHz,  $\text{DMSO-}d_6$ )  $\delta$  163.4, 154.6, 140.9, 140.2, 140.0, 130.5, 129.5, 123.6, 119.3, 56.5, 55.7, 53.8, 45.7, 45.3, 35.3, 32.1, 24.5, 15.7, 15.3. LC/MS (CI):  $m/z = 398$   $[\text{M}+\text{H}]^+$ . Anal. calcd. for  $\text{C}_{19}\text{H}_{23}\text{N}_7\text{OS}$ : C 57.41; H 5.83; N 24.67; S 8.07. Found: C 57.16; H 5.53; N 24.47; S 8.13.

***rac*-2,4-Dimethyl-*N*-(((3*aR*,6*aS*)-2-(tetrazolo[1,5-*b*]pyridazin-6-yl)octahydrocyclopenta[*c*]pyrrol-3*a*-yl)methyl)benzamide (14{19,35,377})**

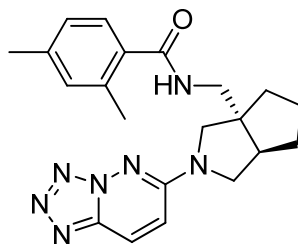

Brownish solid.  $^1\text{H}$  NMR (600 MHz,  $\text{DMSO-}d_6$ )  $\delta$  8.36 (t,  $J = 6.3$  Hz, 1H), 8.33 (d,  $J = 9.9$  Hz, 1H), 7.34 (d,  $J = 9.9$  Hz, 1H), 7.14 (d,  $J = 7.7$  Hz, 1H), 6.99 (s, 1H), 6.95 (d,  $J = 7.7$  Hz, 1H), 3.86 – 3.76 (m, 1H), 3.73 (d,  $J = 11.6$  Hz, 1H), 3.43 – 3.36 (m, 3H), 3.32 – 3.28 (m, 1H), 2.58 (tt,  $J = 8.5, 4.7$  Hz, 1H), 2.23 (s, 6H), 1.95 – 1.86 (m, 1H), 1.79 – 1.71 (m, 2H), 1.71 – 1.63 (m, 2H), 1.57 – 1.48 (m, 1H).  $^{13}\text{C}$  NMR (151 MHz,  $\text{DMSO-}d_6$ )  $\delta$  170.2, 154.6, 140.0, 139.1, 135.5, 134.8, 131.4, 127.5, 126.3, 123.7, 119.3, 56.6, 55.6, 53.8, 45.7, 45.3, 35.4, 32.1, 24.5, 21.2, 19.8. LC/MS (CI):  $m/z = 392$   $[\text{M}+\text{H}]^+$ . Anal. calcd. for  $\text{C}_{21}\text{H}_{25}\text{N}_7\text{O}$ : C 64.43; H 6.44; N 25.05. Found: C 64.66; H 6.12; N 24.75.

***N*-(((3*aS*,6*aR*)-2-(tetrazolo[1,5-*b*]pyridazin-6-yl)octahydrocyclopenta[*c*]pyrrol-3*a*-yl)methyl)-3,4-dihydro-2*H*-pyran-5-carboxamide (14{19,35,378})**

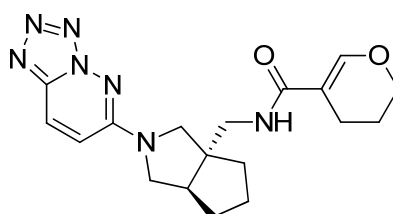

Brownish solid.  $^1\text{H}$  NMR (600 MHz,  $\text{DMSO-}d_6$ )  $\delta$  8.31 (d,  $J = 9.9$  Hz, 1H), 7.57 (t,  $J = 6.0$  Hz, 1H), 7.31 (d,  $J = 9.9$  Hz, 1H), 7.25 (s, 1H), 3.86 (t,  $J = 5.2$  Hz, 2H), 3.74 (dd,  $J = 11.2, 8.3$  Hz, 1H), 3.65 (d,  $J = 11.6$  Hz, 1H), 3.35 (s, 1H), 3.32 – 3.26 (m, 2H), 3.20 (dd,  $J = 13.6, 6.1$  Hz, 1H), 2.53 – 2.49 (m, 1H), 2.13 – 2.06 (m, 2H), 1.92 – 1.84 (m, 1H), 1.77 – 1.67 (m, 4H), 1.65 – 1.56 (m, 2H), 1.51 – 1.45 (m, 1H).  $^{13}\text{C}$  NMR (151 MHz,  $\text{DMSO-}d_6$ )  $\delta$  167.9, 154.5, 150.4, 140.0, 123.6, 119.3, 109.3, 66.0, 56.5, 55.8, 53.6, 45.6, 44.7, 35.1, 31.8, 24.4, 21.2, 19.6. LC/MS (CI):  $m/z = 370$   $[\text{M}+\text{H}]^+$ . Anal. calcd. for  $\text{C}_{18}\text{H}_{23}\text{N}_7\text{O}_2$ : C 58.52; H 6.28; N 26.54. Found: C 58.67; H 6.26; N 26.86.

***rac*-2-Methyl-*N*-(((3*aR*,6*aS*)-2-(tetrazolo[1,5-*b*]pyridazin-6-yl)octahydrocyclopenta[*c*]pyrrol-3*a*-yl)methyl)benzamide (14{19,35,384})**

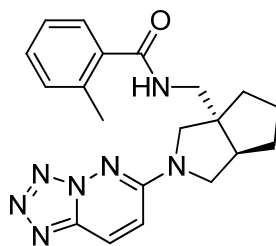

Brownish solid.  $^1\text{H}$  NMR (500 MHz,  $\text{DMSO-}d_6$ )  $\delta$  8.47 (s, 1H), 8.36 (d,  $J = 9.7$  Hz, 1H), 7.37 (d,  $J = 9.7$  Hz, 1H), 7.32 – 7.24 (m, 2H), 7.23 – 7.15 (m, 2H), 3.84 (dd,  $J = 10.4, 8.9$  Hz, 1H), 3.76 (d,  $J = 11.6$  Hz, 1H), 3.50 – 3.36 (m, 4H), 2.66 – 2.59 (m, 1H), 2.29 (s, 3H), 2.01 – 1.90 (m, 1H), 1.83 – 1.75 (m, 2H), 1.73 – 1.65 (m, 2H), 1.60 – 1.52 (m, 1H).  $^{13}\text{C}$  NMR (126 MHz,  $\text{DMSO-}d_6$ )  $\delta$  170.2, 154.7, 140.0, 137.8, 135.4, 130.8, 129.6, 127.4, 125.9, 123.8, 119.3, 56.7, 55.7, 53.8, 45.8, 45.4, 35.5, 32.1, 24.6, 19.8. LC/MS (CI):  $m/z = 378$   $[\text{M}+\text{H}]^+$ . Anal. calcd. for  $\text{C}_{20}\text{H}_{23}\text{N}_7\text{O}$ : C 63.64; H 6.14; N 25.98. Found: C 63.82; H 5.97; N 25.76.

***rac*-3-Methyl-*N*-(((3*aR*,6*aS*)-2-(tetrazolo[1,5-*b*]pyridazin-6-yl)octahydrocyclopenta[*c*]pyrrol-3*a*-yl)methyl)benzamide (14{19,35,171})**

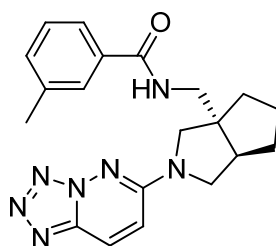

Brownish solid.  $^1\text{H}$  NMR (600 MHz,  $\text{DMSO-}d_6$ )  $\delta$  8.52 (t,  $J = 6.2$  Hz, 1H), 8.30 (d,  $J = 9.9$  Hz, 1H), 7.69 – 7.47 (m, 2H), 7.32 (d,  $J = 9.9$  Hz, 1H), 7.29 – 7.22 (m, 2H), 3.83 – 3.71 (m, 2H), 3.48 – 3.34 (m, 4H), 2.59 (tt,  $J = 8.5, 4.7$  Hz, 1H), 1.96 – 1.88 (m, 1H), 1.79 – 1.72 (m, 2H), 1.69 – 1.61 (m, 2H), 1.55 – 1.48 (m, 1H).  $^{13}\text{C}$  NMR (151 MHz,  $\text{DMSO-}d_6$ )  $\delta$  167.6, 154.5, 140.0, 137.9, 135.0, 132.1, 128.5, 128.1, 124.8, 123.6, 119.3, 56.5, 55.8, 53.7, 45.8, 45.4, 35.2, 31.9, 24.4, 21.3. LC/MS (CI):  $m/z = 378$   $[\text{M}+\text{H}]^+$ . Anal. calcd. for  $\text{C}_{20}\text{H}_{23}\text{N}_7\text{O}$ : C 63.64; H 6.14; N 25.98. Found: C 63.34; H 5.86; N 25.60.

***rac*-2-Methyl-*N*-(((3*aR*,6*aS*)-2-(tetrazolo[1,5-*b*]pyridazin-6-yl)octahydrocyclopenta[*c*]pyrrol-3*a*-yl)methyl)thiophene-3-carboxamide (14{19,35,390})**

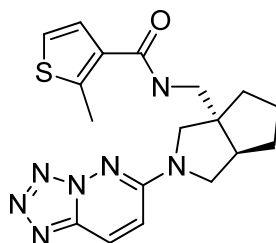

Brownish solid.  $^1\text{H}$  NMR (600 MHz,  $\text{DMSO-}d_6$ )  $\delta$  8.31 (d,  $J = 9.8$  Hz, 1H), 8.22 (t,  $J = 6.3$  Hz, 1H), 7.33 (d,  $J = 9.8$  Hz, 1H), 7.21 (s, 2H), 3.78 (dd,  $J = 11.1, 8.2$  Hz, 1H), 3.71 (d,  $J = 11.6$  Hz, 1H), 3.44 – 3.35 (m, 3H), 3.32 – 3.27 (m, 1H), 2.57 (tt,  $J = 8.6, 4.7$  Hz, 1H), 2.47 (s, 3H), 1.97 – 1.86 (m, 1H), 1.81 – 1.71 (m, 2H), 1.69 – 1.60 (m, 2H), 1.55 – 1.47 (m, 1H).  $^{13}\text{C}$  NMR (151 MHz,  $\text{DMSO-}d_6$ )  $\delta$  164.8, 154.6, 143.3, 140.0, 133.0, 127.7, 123.6, 122.3, 119.3, 56.5, 55.7, 53.7, 45.7, 45.0, 35.3, 31.9, 24.4, 14.9. LC/MS (CI):  $m/z = 384$   $[\text{M}+\text{H}]^+$ . Anal. calcd. for  $\text{C}_{18}\text{H}_{21}\text{N}_7\text{OS}$ : C 56.38; H 5.52; N 25.57; S 8.36. Found: C 55.99; H 5.81; N 25.78; S 8.00.

***rac*-4-Methyl-*N*-(((3*R*,6*aS*)-2-(tetrazolo[1,5-*b*]pyridazin-6-yl)octahydrocyclopenta[*c*]pyrrol-3*a*-yl)methyl)thiophene-2-carboxamide (14{19,35,394})**

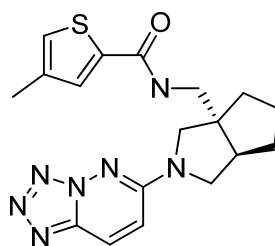

Brownish solid.  $^1\text{H}$  NMR (500 MHz,  $\text{DMSO-}d_6$ )  $\delta$  8.51 (t,  $J = 6.3$  Hz, 1H), 8.33 (d,  $J = 9.9$  Hz, 1H), 7.56 (s, 1H), 7.34 (d,  $J = 9.9$  Hz, 1H), 7.29 (s, 1H), 3.80 (dd,  $J = 11.2, 8.1$  Hz, 1H), 3.73 (d,  $J = 11.6$  Hz, 1H), 3.50 – 3.38 (m, 3H), 3.35 – 3.31 (m, 1H), 2.59 (tt,  $J = 8.4, 4.6$  Hz, 1H), 2.17 (s, 3H), 1.99 – 1.88 (m, 1H), 1.83 – 1.73 (m, 2H), 1.71 – 1.63 (m, 2H), 1.57 – 1.50 (m, 1H).  $^{13}\text{C}$  NMR (126 MHz,  $\text{DMSO-}d_6$ )  $\delta$  162.3, 154.6, 140.0, 139.8, 138.1, 130.5, 126.5, 123.7, 119.3, 56.5, 55.8, 53.7, 45.8, 45.3, 35.2, 31.8, 24.4, 15.8. LC/MS (CI):  $m/z = 384$   $[\text{M}+\text{H}]^+$ . Anal. calcd. for  $\text{C}_{18}\text{H}_{21}\text{N}_7\text{OS}$ : C 56.38; H 5.52; N 25.57; S 8.36. Found: C 56.09; H 5.52; N 25.53; S 8.13.

**1-Methyl-*N*-(6-(tetrazolo[1,5-*b*]pyridazin-6-ylamino)spiro[3.3]heptan-2-yl)cycloheptane-carboxamide (14{114,35,399})**

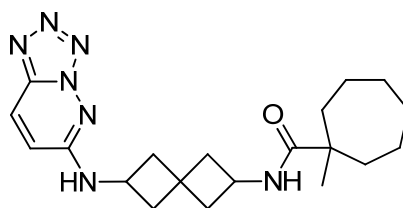

Brownish solid.  $^1\text{H}$  NMR (600 MHz,  $\text{DMSO-}d_6$ )  $\delta$  8.17 (d,  $J = 9.7$  Hz, 1H), 8.10 (d,  $J = 6.4$  Hz, 1H), 7.36 (d,  $J = 7.3$  Hz, 1H), 7.03 (d,  $J = 9.7$  Hz, 1H), 4.14 – 4.05 (m, 2H), 2.54 – 2.50 (m, 1H), 2.39 – 2.32 (m, 2H), 2.15 (ddd,  $J = 12.0, 7.5, 4.9$  Hz, 1H), 2.05 (dd,  $J = 10.7, 8.8$  Hz, 1H), 2.00 – 1.90 (m, 5H), 1.45 – 1.36 (m, 8H), 1.29 – 1.24 (m, 2H), 0.99 (s, 3H).  $^{13}\text{C}$  NMR (151 MHz,  $\text{DMSO-}d_6$ )  $\delta$  177.1, 155.1, 140.4, 123.5, 121.1, 45.0, 42.5, 42.4, 42.4, 42.3, 41.9, 37.9, 37.9, 31.4, 29.9, 27.7, 23.7. LC/MS (CI):  $m/z = 384$   $[\text{M}+\text{H}]^+$ . Anal. calcd. for  $\text{C}_{20}\text{H}_{29}\text{N}_7\text{O}$ : C 62.64; H 7.62; N 25.57. Found: C 62.79; H 7.70; N 25.75.

***rac*-2-Chloro-*N*-(((3*R*,6*aS*)-2-(tetrazolo[1,5-*b*]pyridazin-6-yl)octahydrocyclopenta[*c*]pyrrol-3*a*-yl)methyl)benzamide (14{19,35,408})**

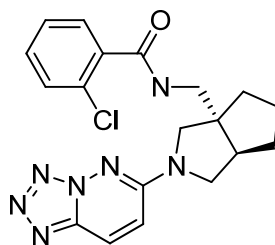

Brownish solid.  $^1\text{H}$  NMR (500 MHz,  $\text{DMSO-}d_6$ )  $\delta$  8.67 (t,  $J = 5.9$  Hz, 1H), 8.36 (d,  $J = 9.7$  Hz, 1H), 7.47 (d,  $J = 8.0$  Hz, 1H), 7.44 – 7.40 (m, 1H), 7.39 – 7.33 (m, 3H), 3.84 (dd,  $J = 10.6, 8.5$  Hz, 1H), 3.75 (d,  $J = 11.7$  Hz, 1H), 3.50 – 3.36 (m, 4H), 2.68 – 2.61 (m, 1H), 2.00 – 1.91 (m, 1H), 1.82 – 1.67 (m, 4H), 1.58 – 1.52 (m, 1H).  $^{13}\text{C}$  NMR (126 MHz,  $\text{DMSO-}d_6$ )  $\delta$  167.5, 154.7, 140.0, 137.6, 131.1, 130.1, 130.0, 129.2, 127.5, 123.8, 119.3, 56.7, 55.6, 53.8, 45.7, 45.4, 35.6.

32.2, 24.6. LC/MS (CI):  $m/z = 398/400$   $[M+H]^+$ . Anal. calcd. for  $C_{19}H_{20}ClN_7O$ : C 57.36; H 5.07; N 24.64; Cl 8.91. Found: C 57.48; H 4.96; N 24.62; Cl 8.64.

***rac-N-(((3a*R*,6a*S*)-2-(tetrazolo[1,5-*b*]pyridazin-6-yl)octahydrocyclopenta[*c*]pyrrol-3a-yl)methyl)furan-3-carboxamide (14{19,35,32})***

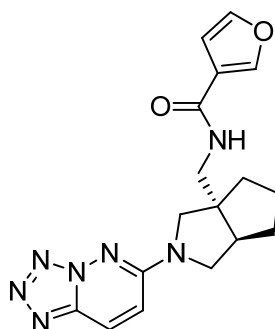

Brownish solid.  $^1H$  NMR (500 MHz,  $DMSO-d_6$ )  $\delta$  8.34 (d,  $J = 9.9$  Hz, 1H), 8.29 (t,  $J = 6.3$  Hz, 1H), 8.16 (s, 1H), 7.68 (d,  $J = 2.0$  Hz, 1H), 7.35 (d,  $J = 9.8$  Hz, 1H), 6.83 (d,  $J = 2.0$  Hz, 1H), 3.79 (dd,  $J = 11.4, 8.1$  Hz, 1H), 3.70 (d,  $J = 11.4$  Hz, 1H), 3.47 – 3.36 (m, 4H), 2.61 – 2.54 (m, 1H), 1.97 – 1.89 (m, 1H), 1.81 – 1.73 (m, 2H), 1.70 – 1.62 (m, 2H), 1.57 – 1.50 (m, 1H).  $^{13}C$  NMR (126 MHz,  $DMSO-d_6$ )  $\delta$  162.7, 154.6, 145.6, 144.4, 140.0, 123.7, 123.1, 119.3, 109.5, 56.5, 55.7, 53.7, 45.7, 44.7, 35.2, 31.8, 24.4. LC/MS (CI):  $m/z = 354$   $[M+H]^+$ . Anal. calcd. for  $C_{17}H_{19}N_7O_2$ : C 57.78; H 5.42; N 27.75. Found: C 58.07; H 5.29; N 28.08.

**General procedure for the reaction sequence E.** Amine **2** or **9** (0.5 mmol), carboxylic acid **8** or **3** (0.6 mmol),  $iPr_2NEt$  (1.25 mmol\*), and 1-[bis(dimethylamino)methylene]-1*H*-1,2,3-triazolo[4,5-*b*]pyridinium 3-oxide hexafluorophosphate (HATU) (0.575 mmol) were mixed in dry DMF (appr. 1.4 mL). The reaction mixture was sealed and left at ambient temperature for 16 h, Alkyne **10** (0.6 mmol),  $iPrNEt_2$  (1.5 mmol\*), and  $Cu(OAc)_2$  (0.05 mmol) were added in one portion, the reaction mixture was sealed and heated at 80 °C for 16 h, then cooled and evaporated under reduced pressure. The residue was dissolved in DMSO (appr. 1 mL), filtered, analyzed by LCMS, and transferred for the HPLC purification.

**3-Methyl-1-(3-((4-phenyl-1*H*-1,2,3-triazol-1-yl)methyl)piperidin-1-yl)but-3-en-1-one (15{5,7,7})**

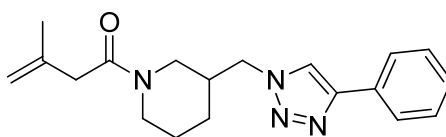

Yellowish liquid. The compound existed as a ca. 11:9 mixture of rotamers.  $^1H$  NMR (500 MHz,  $DMSO-d_6$ )  $\delta$  8.56 (d,  $J = 7.1$  Hz, 1H), 7.87 – 7.78 (m, 2H), 7.43 (t,  $J = 7.5$  Hz, 2H), 7.31 (t,  $J = 7.5$  Hz, 1H), 4.81 (s, 0.55H) and 4.69 (s, 0.55H) and 4.68 (s, 0.45H) and 4.48 (s, 0.45H), 4.37 – 4.27 (m, 2H), 4.19 – 4.10 (m, 1H), 3.70 – 3.63 (m, 0.55H) and 3.58 – 3.53 (m, 0.45H), 3.09 – 2.93 (m, 2H), 2.91 – 2.80 (m, 1H), 2.66 – 2.60 (m, 0.45H) and 2.55 (dd,  $J = 12.9, 10.2$  Hz, 0.55H), 2.04 – 1.92 (m, 1H), 1.72 – 1.52 (m, 5H), 1.37 – 1.19 (m, 2H).  $^{13}C$  NMR (126 MHz,  $DMSO-d_6$ )  $\delta$  168.6 and 168.4, 146.9 and 146.7, 140.7 and 140.3, 131.2, 129.3, 128.3, 125.6 and 125.6, 122.2 and 122.2, 113.1 and 113.0, 52.8 and 52.5, 49.2 and 46.4, 44.6 and 43.0, 42.8 and 41.9, 37.7 and 36.9, 28.0 and 27.9, 25.0 and 24.4, 22.9 and 22.7. LC/MS (CI):  $m/z = 325$   $[M+H]^+$ . Anal. calcd. for  $C_{19}H_{24}N_4O$ : C 70.34; H 7.46; N 17.27. Found: C 70.63; H 7.43; N 17.24.

***N*-(2-(Hydroxymethyl)benzyl)-2-(4-(4-hydroxytetrahydro-2*H*-pyran-4-yl)-1*H*-1,2,3-triazol-1-yl)acetamide (15{3,17,38})**

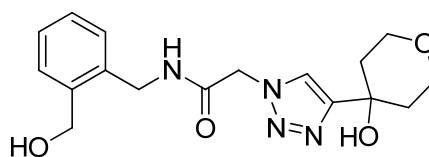

Yellowish oil.  $^1\text{H}$  NMR (500 MHz,  $\text{DMSO-}d_6$ )  $\delta$  8.68 (t,  $J = 5.6$  Hz, 1H), 7.91 (s, 1H), 7.43 – 7.37 (m, 1H), 7.29 – 7.20 (m, 3H), 5.23 (s, 1H), 5.15 (s, 1H), 5.13 (s, 2H), 4.56 (s, 2H), 4.36 (d,  $J = 5.5$  Hz, 2H), 3.75 (td,  $J = 11.0, 2.5$  Hz, 2H), 3.67 – 3.56 (m, 2H), 2.05 (ddd,  $J = 14.3, 10.5, 4.5$  Hz, 2H), 1.74 – 1.63 (m, 2H).  $^{13}\text{C}$  NMR (126 MHz,  $\text{DMSO-}d_6$ )  $\delta$  165.9, 155.1, 140.3, 136.1, 128.3, 127.7, 127.4, 127.3, 123.1, 66.1, 63.5, 61.0, 52.0, 40.0, 38.4. LC/MS (CI):  $m/z = 347$   $[\text{M}+\text{H}]^+$ . Anal. calcd. for  $\text{C}_{17}\text{H}_{22}\text{N}_4\text{O}_4$ : C 58.95; H 6.4; N 16.17. Found: C 59.25; H 6.19; N 16.43.

***N*-(3-Hydroxybutyl)-2-(4-(4-hydroxytetrahydro-2*H*-pyran-4-yl)-1*H*-1,2,3-triazol-1-yl)-*N*-methylacetamide (Z4180225403)**

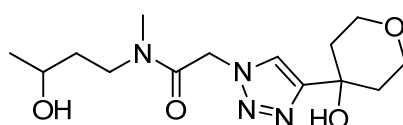

Yellowish solid. The compound existed as a ca. 11:9 mixture of rotamers.  $^1\text{H}$  NMR (500 MHz,  $\text{DMSO-}d_6$ )  $\delta$  7.81 (s, 0.45H) and 7.78 (s, 0.55H), 5.59 – 5.38 (m, 1H), 5.35 (s, 1H), 5.19 (s, 1H), 4.64 (d,  $J = 4.8$  Hz, 0.45H) and 4.43 (d,  $J = 4.8$  Hz, 0.55H), 3.77 – 3.69 (m, 2H), 3.67 – 3.50 (m, 3H), 3.50 – 3.33 (m, 2H), 3.02 (s, 1.65H) and 2.81 (s, 1.35H), 2.03 (ddd,  $J = 14.2, 10.4, 4.3$  Hz, 2H), 1.74 – 1.65 (m, 2.2H) and 1.60 – 1.42 (m, 1.8H), 1.11 (d,  $J = 6.2$  Hz, 1.35H) and 1.04 (d,  $J = 6.2$  Hz, 1.65H).  $^{13}\text{C}$  NMR (126 MHz,  $\text{DMSO-}d_6$ )  $\delta$  165.9 and 165.7, 154.9 and 154.9, 123.3 and 123.2, 66.1 and 66.0, 64.2 and 63.7, 63.5, 51.1 and 50.7, 45.8 and 45.4, 38.5, 37.1 and 36.7, 34.6 and 33.4, 24.4 and 24.1. LC/MS (CI):  $m/z = 313$   $[\text{M}+\text{H}]^+$ . Anal. calcd. for  $\text{C}_{14}\text{H}_{24}\text{N}_4\text{O}_4$ : C 53.83; H 7.74; N 17.94. Found: C 53.81; H 7.50; N 17.56.

***N*-((4,5-Dimethylthiazol-2-yl)methyl)-2-(4-(hydroxy(phenyl)methyl)-1*H*-1,2,3-triazol-1-yl)-acetamide (15{3,21,37})**

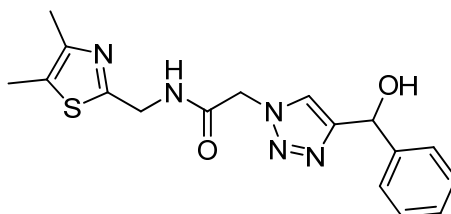

Yellowish solid.  $^1\text{H}$  NMR (500 MHz,  $\text{DMSO-}d_6$ )  $\delta$  9.09 (t,  $J = 6.1$  Hz, 1H), 7.81 (s, 1H), 7.41 (d,  $J = 7.6$  Hz, 2H), 7.33 (t,  $J = 7.6$  Hz, 2H), 7.24 (t,  $J = 6.9$  Hz, 1H), 5.99 (d,  $J = 3.9$  Hz, 1H), 5.82 (d,  $J = 4.7$  Hz, 1H), 5.11 (s, 2H), 4.46 (d,  $J = 5.9$  Hz, 2H), 2.28 (s, 3H), 2.21 (s, 3H).  $^{13}\text{C}$  NMR (126 MHz,  $\text{DMSO-}d_6$ )  $\delta$  166.2, 163.3, 151.7, 147.6, 144.6, 128.5, 127.5, 126.9, 126.6, 124.0, 68.4, 51.9, 40.8, 14.9, 11.3. LC/MS (CI):  $m/z = 358$   $[\text{M}+\text{H}]^+$ . Anal. calcd. for  $\text{C}_{17}\text{H}_{19}\text{N}_5\text{O}_2\text{S}$ : C 57.13; H 5.36; N 19.59; S 8.97. Found: C 56.82; H 5.03; N 19.58; S 9.24.

**(2-((4-Cyclopropyl-1*H*-1,2,3-triazol-1-yl)methyl)pyrrolidin-1-yl)(1-hydroxy-3,3-dimethylcyclobutyl)methanone (15{1,6,6})**

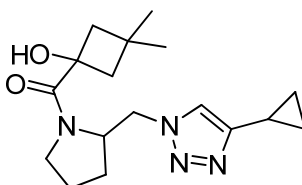

Yellowish oil.  $^1\text{H}$  NMR (500 MHz,  $\text{DMSO-}d_6$ )  $\delta$  7.63 (s, 1H), 5.71 (s, 1H), 4.44 (d,  $J = 4.5$  Hz, 2H), 4.22 (dq,  $J = 8.6, 4.5$  Hz, 1H), 3.46 (dt,  $J = 10.8, 6.8$  Hz, 1H), 3.16 – 3.07 (m, 1H), 2.47 – 2.42 (m, 1H), 2.36 (dd,  $J = 12.8, 2.6$  Hz, 1H), 1.89 (tt,  $J = 8.6, 5.0$  Hz, 1H), 1.85 – 1.68 (m, 3H), 1.65 – 1.52 (m, 2H), 1.33 – 1.23 (m, 1H), 1.17 (s, 3H), 0.98 (s, 3H), 0.92 – 0.81 (m, 2H), 0.71 – 0.59 (m, 2H).  $^{13}\text{C}$  NMR (126 MHz,  $\text{DMSO-}d_6$ )  $\delta$  172.7, 149.6, 121.8, 70.5, 57.3, 50.4, 47.0, 45.8, 31.1, 29.8, 27.0, 26.9, 24.1, 8.2, 8.1, 7.0. LC/MS (CI):  $m/z = 319$   $[\text{M}+\text{H}]^+$ . Anal. calcd. for  $\text{C}_{17}\text{H}_{26}\text{N}_4\text{O}_2$ : C 64.12; H 8.23; N 17.60. Found: C 64.07; H 8.13; N 17.64.

***rac*-(1*R*,2*R*)-2-Methyl-*N*-(2-(4-(2-phenoxyethyl)-1*H*-1,2,3-triazol-1-yl)propyl)cyclopropane-carboxamide (15{4,4,4})**

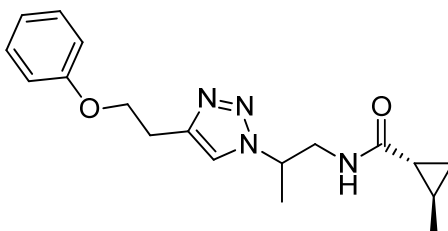

Yellowish oil.  $^1\text{H}$  NMR (500 MHz,  $\text{DMSO-}d_6$ )  $\delta$  8.09 (q,  $J = 5.5$  Hz, 1H), 7.95 (d,  $J = 3.0$  Hz, 1H), 7.26 (t,  $J = 7.9$  Hz, 2H), 7.00 – 6.80 (m, 3H), 4.75 – 4.64 (m, 1H), 4.19 (t,  $J = 6.8$  Hz, 2H), 3.50 – 3.35 (m, 2H), 3.06 (t,  $J = 6.8$  Hz, 2H), 1.41 (d,  $J = 6.9$  Hz, 3H), 1.21 (dq,  $J = 7.9, 3.9$  Hz, 1H), 1.12 – 1.01 (m, 1H), 0.97 (dd,  $J = 6.0, 2.2$  Hz, 3H), 0.85 – 0.76 (m, 1H), 0.42 (ddd,  $J = 8.8, 5.8, 3.4$  Hz, 1H).  $^{13}\text{C}$  NMR (126 MHz,  $\text{DMSO-}d_6$ )  $\delta$  173.1, 158.8, 143.5, 129.9, 121.8, 121.1, 114.9, 66.9, 56.2, 44.6, 26.1, 22.4, 19.0, 19.0, 18.0, 14.9, 14.9, 14.9, 14.9. LC/MS (CI):  $m/z = 329$   $[\text{M}+\text{H}]^+$ . Anal. calcd. for  $\text{C}_{18}\text{H}_{24}\text{N}_4\text{O}_2$ : C 65.83; H 7.37; N 17.06. Found: C 65.75; H 7.34; N 16.96.

**(*S*)-2-Cyclobutylidene-*N*-(1-(4-(1-methyl-1*H*-pyrazol-5-yl)-1*H*-1,2,3-triazol-1-yl)propan-2-yl)acetamide (15{6,11,11})**

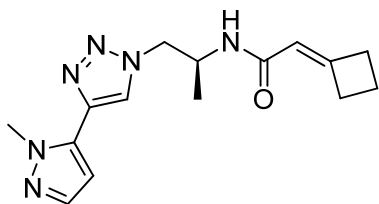

Yellowish solid.  $^1\text{H}$  NMR (500 MHz,  $\text{DMSO-}d_6$ )  $\delta$  8.42 (s, 1H), 7.71 (d,  $J = 8.0$  Hz, 1H), 7.45 (d,  $J = 1.8$  Hz, 1H), 6.54 (d,  $J = 1.5$  Hz, 1H), 5.55 – 5.45 (m, 1H), 4.50 – 4.34 (m, 2H), 4.31 – 4.21 (m, 1H), 4.01 (d,  $J = 1.3$  Hz, 3H), 3.01 – 2.85 (m, 2H), 2.70 (t,  $J = 7.9$  Hz, 2H), 2.02 – 1.86 (m, 2H), 1.06 (d,  $J = 7.0$  Hz, 3H).  $^{13}\text{C}$  NMR (126 MHz,  $\text{DMSO-}d_6$ )  $\delta$  165.4, 160.3, 138.5, 137.7, 133.7, 124.2, 114.9, 105.6, 54.3, 44.7, 38.7, 33.4, 32.1, 18.2, 18.1. LC/MS (CI):  $m/z = 301$   $[\text{M}+\text{H}]^+$ . Anal. calcd. for  $\text{C}_{15}\text{H}_{20}\text{N}_6\text{O}$ : C 59.98; H 6.71; N 27.98. Found: C 60.18; H 6.75; N 27.72.

**(*S*)-*N*-(1-(4-(2,6-Difluorophenyl)-1*H*-1,2,3-triazol-1-yl)propan-2-yl)-2-methylbut-2-enamide (15{6,1,8})**

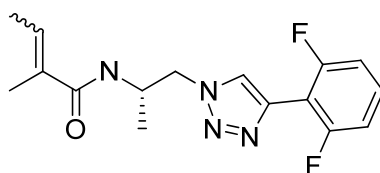

Yellowish solid.  $^1\text{H}$  NMR (500 MHz,  $\text{DMSO-}d_6$ )  $\delta$  8.33 (d,  $J = 1.5$  Hz, 1H), 7.71 (d,  $J = 8.4$  Hz, 1H), 7.46 (tt,  $J = 8.4, 6.4$  Hz, 1H), 7.21 (t,  $J = 8.4$  Hz, 2H), 6.20 (q,  $J = 6.4$  Hz, 1H), 4.53 (dd,  $J = 13.6, 5.4$  Hz, 1H), 4.47 (dd,  $J = 13.6, 7.9$  Hz, 1H), 4.38 – 4.28 (m, 1H), 1.91 – 1.39 (m, 6H), 1.11 (d,  $J = 6.7$  Hz, 3H).  $^{13}\text{C}$  NMR (126 MHz,  $\text{DMSO-}d_6$ )  $\delta$  168.7, 159.8 (dd,  $J = 251, 7.1$  Hz), 135.1 (t,  $J = 2.7$  Hz), 132.3, 130.6 (t,  $J = 10.5$  Hz), 129.6, 126.2 (t,  $J = 4.2$  Hz), 112.6 (dd,  $J = 20.7, 5.0$  Hz), 108.8 (t,  $J = 17.4$  Hz), 53.9, 45.5, 18.3, 14.0, 12.7.  $^{19}\text{F}$  NMR (376 MHz,  $\text{DMSO-}d_6$ )  $\delta$  – 111.9. LC/MS (CI):  $m/z = 321$   $[\text{M}+\text{H}]^+$ . Anal. calcd. for  $\text{C}_{16}\text{H}_{18}\text{F}_2\text{N}_4\text{O}$ : C 59.99; H 5.66; N 17.49. Found: C 59.81; H 5.97; N 17.62.

**(S)-3-Cyclopropyl-N-(1-(4-(2-methylpyridin-3-yl)-1H-1,2,3-triazol-1-yl)propan-2-yl)propanamide (15{6,27,27})**

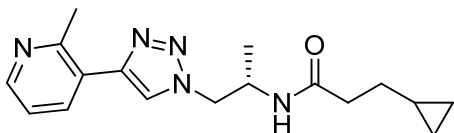

Beige solid.  $^1\text{H}$  NMR (500 MHz,  $\text{DMSO-}d_6$ )  $\delta$  8.51 – 8.42 (m, 1H), 8.38 (d,  $J = 1.5$  Hz, 1H), 8.08 (dd,  $J = 7.9, 1.8$  Hz, 1H), 7.86 (d,  $J = 8.1$  Hz, 1H), 7.32 (dd,  $J = 7.9, 4.8$  Hz, 1H), 4.49 (dd,  $J = 13.6, 5.2$  Hz, 1H), 4.40 (dd,  $J = 13.6, 7.5$  Hz, 1H), 4.35 – 4.25 (m, 1H), 2.63 (s, 3H), 2.08 (t,  $J = 7.4$  Hz, 2H), 1.39 – 1.24 (m, 2H), 1.10 (d,  $J = 6.7$  Hz, 3H), 0.60 – 0.49 (m, 1H), 0.32 – 0.22 (m, 2H), –0.04 – –0.13 (m, 2H).  $^{13}\text{C}$  NMR (126 MHz,  $\text{DMSO-}d_6$ )  $\delta$  172.1, 155.0, 148.5, 144.0, 135.8, 126.0, 124.8, 121.9, 54.2, 45.0, 36.0, 30.7, 24.7, 18.2, 10.8, 4.7, 4.7. LC/MS (CI):  $m/z = 314$   $[\text{M}+\text{H}]^+$ . Anal. calcd. for  $\text{C}_{17}\text{H}_{23}\text{N}_5\text{O}$ : C 65.15; H 7.40; N 22.35. Found: C 65.41; H 7.03; N 22.24.

**(R)-N-(1-(4-(4-Fluorophenyl)-1H-1,2,3-triazol-1-yl)propan-2-yl)bicyclo[1.1.1]pentane-1-carboxamide (15{2,2,2})**

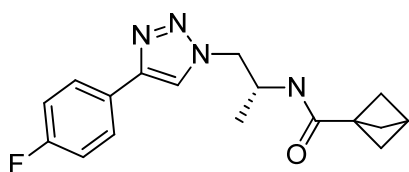

Colorless solid.  $^1\text{H}$  NMR (600 MHz,  $\text{DMSO-}d_6$ )  $\delta$  8.35 (s, 1H), 7.84 (dd,  $J = 8.7, 5.6$  Hz, 2H), 7.63 (d,  $J = 8.4$  Hz, 1H), 7.26 (t,  $J = 8.7$  Hz, 2H), 4.42 (dd,  $J = 13.6, 5.6$  Hz, 1H), 4.33 (dd,  $J = 13.6, 7.4$  Hz, 1H), 4.24 – 4.15 (m, 1H), 2.33 (s, 1H), 1.84 (s, 6H), 1.06 (d,  $J = 6.8$  Hz, 3H).  $^{13}\text{C}$  NMR (151 MHz,  $\text{DMSO-}d_6$ )  $\delta$  168.9, 162.1 (d,  $J = 244$  Hz), 145.5, 127.8 (d,  $J = 3.1$  Hz), 127.5 (d,  $J = 8.2$  Hz), 122.1, 116.2 (d,  $J = 21.7$  Hz), 53.9, 50.8, 45.0, 44.6, 26.7, 18.0.  $^{19}\text{F}$  NMR (376 MHz,  $\text{DMSO-}d_6$ )  $\delta$  –114.8. LC/MS (CI):  $m/z = 315$   $[\text{M}+\text{H}]^+$ . Anal. calcd. for  $\text{C}_{17}\text{H}_{19}\text{FN}_4\text{O}$ : C 64.95; H 6.09; N 17.82. Found: C 65.06; H 6.17; N 17.48.

**rac-4-((4-((1R,2S)-2-Hydroxycyclopentyl)-1H-1,2,3-triazol-1-yl)methyl)-N-(phenyl(thiophen-2-yl)methyl)benzamide (15{1,2,17})**



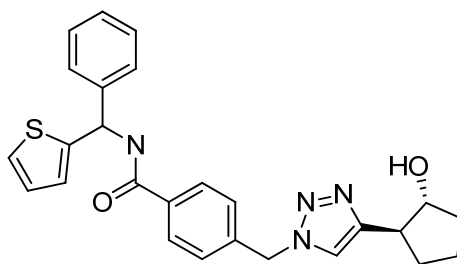

Beige solid.  $^1\text{H}$  NMR (500 MHz,  $\text{DMSO-}d_6$ )  $\delta$  9.46 (d,  $J = 8.7$  Hz, 1H), 7.98 – 7.87 (m, 3H), 7.48 (d,  $J = 7.4$  Hz, 2H), 7.46 – 7.42 (m, 1H), 7.42 – 7.34 (m, 4H), 7.31 (t,  $J = 7.4$  Hz, 1H), 6.97 (t,  $J = 4.2$  Hz, 1H), 6.87 – 6.79 (m, 1H), 6.58 (d,  $J = 8.7$  Hz, 1H), 5.60 (s, 2H), 4.74 (d,  $J = 4.8$  Hz, 1H), 4.08 – 3.98 (m, 1H), 2.98 – 2.89 (m, 1H), 2.12 – 2.02 (m, 1H), 1.88 – 1.80 (m, 1H), 1.76 – 1.60 (m, 3H), 1.55 – 1.48 (m, 1H).  $^{13}\text{C}$  NMR (126 MHz,  $\text{DMSO-}d_6$ )  $\delta$  165.8, 150.4, 146.7, 142.2, 140.0, 134.3, 128.8, 128.6, 128.2, 127.9, 127.9, 127.3, 126.1, 125.9, 122.1, 78.0, 52.8, 52.8, 45.2, 34.4, 30.5, 22.1. LC/MS (CI):  $m/z = 459$   $[\text{M}+\text{H}]^+$ . Anal. calcd. for  $\text{C}_{26}\text{H}_{26}\text{N}_4\text{O}_2\text{S}$ : C 68.10; H 5.72; N 12.22; S 6.99. Found: C 68.08; H 5.56; N 11.84; S 6.92.

**(R)-2-Hydroxy-N-(1-(4-(4-(trifluoromethyl)phenyl)-1H-1,2,3-triazol-1-yl)propan-2-yl)acetamide (15{2,30,29})**

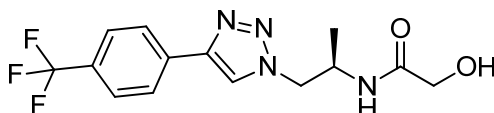

Beige solid.  $^1\text{H}$  NMR (600 MHz,  $\text{DMSO-}d_6$ )  $\delta$  8.63 (s, 1H), 8.04 (d,  $J = 8.2$  Hz, 2H), 7.84 (d,  $J = 8.6$  Hz, 1H), 7.78 (d,  $J = 8.2$  Hz, 2H), 5.47 (t,  $J = 5.8$  Hz, 1H), 4.53 – 4.44 (m, 2H), 4.37 – 4.31 (m, 1H), 3.78 – 3.67 (m, 2H), 1.10 (d,  $J = 6.8$  Hz, 3H).  $^{13}\text{C}$  NMR (151 MHz,  $\text{DMSO-}d_6$ )  $\delta$  172.0, 145.2, 135.2, 128.4 (q,  $J = 31.7$  Hz), 126.3 (q,  $J = 4.0$  Hz), 126.1, 124.7 (q,  $J = 272$  Hz), 123.5, 61.7, 54.1, 44.7, 18.1.  $^{19}\text{F}$  NMR (376 MHz,  $\text{DMSO-}d_6$ )  $\delta$  -61.5. LC/MS (CI):  $m/z = 329$   $[\text{M}+\text{H}]^+$ . Anal. calcd. for  $\text{C}_{26}\text{H}_{26}\text{N}_4\text{O}_2\text{S}$ : C 68.10; H 5.72; N 12.22; S 6.99. Found: C 68.08; H 5.56; N 11.84; S 6.92.

**(1R,6S,7r)-N-(2-(4-(Ethoxymethyl)-1H-1,2,3-triazol-1-yl)propyl)bicyclo[4.1.0]heptane-7-carboxamide (15{4,15,14})**

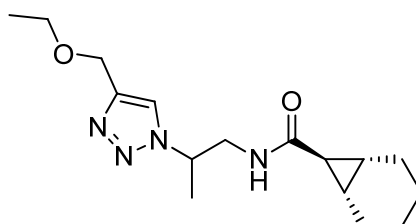

Yellowish solid.  $^1\text{H}$  NMR (500 MHz,  $\text{DMSO-}d_6$ )  $\delta$  8.08 (s, 1H), 8.01 (t,  $J = 5.0$  Hz, 1H), 4.77 – 4.67 (m, 1H), 4.47 (s, 2H), 3.53 – 3.41 (m, 4H), 1.86 – 1.76 (m, 2H), 1.53 (s, 2H), 1.43 (d,  $J = 6.9$  Hz, 3H), 1.32 – 1.17 (m, 5H), 1.17 – 1.04 (m, 5H).  $^{13}\text{C}$  NMR (126 MHz,  $\text{DMSO-}d_6$ )  $\delta$  173.4, 144.3, 122.8, 65.3, 63.7, 56.4, 44.5, 26.6, 22.8, 21.2, 19.5, 19.5, 19.1, 15.5. LC/MS (CI):  $m/z = 307$   $[\text{M}+\text{H}]^+$ . Anal. calcd. for  $\text{C}_{16}\text{H}_{26}\text{N}_4\text{O}_2$ : C 62.72; H 8.55; N 18.29. Found: C 62.96; H 8.58; N 18.06.

**(S)-N-(1-(4-(Methoxymethyl)-1H-1,2,3-triazol-1-yl)propan-2-yl)-1,2,2,3,3-pentamethylcyclopropanecarboxamide (15{6,14,13})**

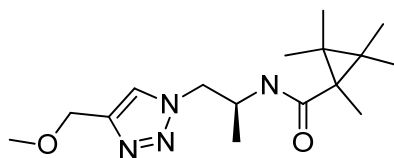

Yellowish oil.  $^1\text{H}$  NMR (600 MHz,  $\text{DMSO-}d_6$ )  $\delta$  7.95 (s, 1H), 7.33 (d,  $J = 8.4$  Hz, 1H), 4.38 (s, 2H), 4.35 – 4.29 (m, 2H), 4.26 – 4.20 (m, 1H), 3.20 (d,  $J = 1.2$  Hz, 3H), 1.02 (d,  $J = 6.7$  Hz, 3H), 0.98 (s, 3H), 0.89 (s, 6H), 0.87 (s, 3H), 0.84 (s, 3H).  $^{13}\text{C}$  NMR (151 MHz,  $\text{DMSO-}d_6$ )  $\delta$  172.8, 143.9, 124.6, 65.3, 57.6, 53.8, 44.8, 34.6, 23.6, 23.6, 20.9, 20.9, 18.4, 18.1, 17.9, 15.6. LC/MS (CI):  $m/z = 309$   $[\text{M}+\text{H}]^+$ . Anal. calcd. for  $\text{C}_{16}\text{H}_{28}\text{N}_4\text{O}_2$ : C 62.31; H 9.15; N 18.17. Found: C 61.98; H 8.85; N 18.51.

**(S)-1,3-Dimethyl-N-(1-(4-(pent-4-en-1-yl)-1H-1,2,3-triazol-1-yl)propan-2-yl)-1H-pyrazole-5-carboxamide (15{6,9,9})**

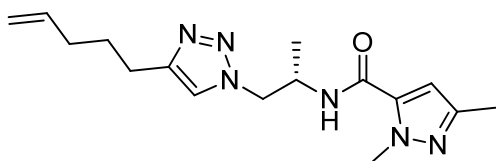

Yellowish solid.  $^1\text{H}$  NMR (500 MHz,  $\text{DMSO-}d_6$ )  $\delta$  8.26 (d,  $J = 7.3$  Hz, 1H), 7.77 (s, 1H), 6.53 (s, 1H), 5.78 (ddt,  $J = 17.0, 10.3, 6.6$  Hz, 1H), 4.96 (t,  $J = 13.9$  Hz, 2H), 4.50 – 4.30 (m, 3H), 3.87 (s, 3H), 2.58 (t,  $J = 7.5$  Hz, 2H), 2.00 (q,  $J = 7.2$  Hz, 2H), 1.62 (p,  $J = 7.5$  Hz, 2H), 1.14 (d,  $J = 5.9$  Hz, 3H).  $^{13}\text{C}$  NMR (126 MHz,  $\text{DMSO-}d_6$ )  $\delta$  159.4, 146.8, 145.7, 138.8, 136.1, 122.9, 115.5, 106.9, 53.7, 45.5, 38.7, 32.9, 28.6, 24.8, 18.1, 13.5. LC/MS (CI):  $m/z = 317$   $[\text{M}+\text{H}]^+$ . Anal. calcd. for  $\text{C}_{16}\text{H}_{24}\text{N}_6\text{O}$ : C 60.74; H 7.65; N 26.56. Found: C 60.46; H 7.62; N 26.76.

**N-(2-(4-(1-Methyl-1H-pyrazol-3-yl)-1H-1,2,3-triazol-1-yl)ethyl)cyclooct-4-enecarboxamide (15{3,3,3})**

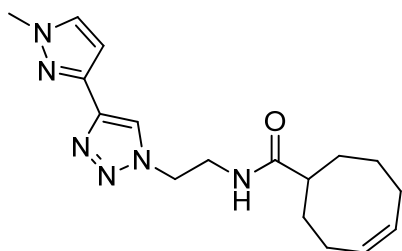

Yellowish oil.  $^1\text{H}$  NMR (500 MHz,  $\text{DMSO-}d_6$ )  $\delta$  8.21 (s, 1H), 7.84 (t,  $J = 5.7$  Hz, 1H), 7.71 (d,  $J = 2.3$  Hz, 1H), 6.54 (dd,  $J = 2.3, 0.8$  Hz, 1H), 5.66 – 5.49 (m, 2H), 4.40 (t,  $J = 6.0$  Hz, 2H), 3.84 (s, 3H), 3.54 – 3.38 (m, 2H), 2.30 – 2.21 (m, 1H), 2.13 (ddd,  $J = 11.5, 6.9, 4.1$  Hz, 1H), 2.10 – 2.00 (m, 2H), 2.00 – 1.89 (m, 1H), 1.66 (dt,  $J = 14.6, 4.1$  Hz, 1H), 1.62 – 1.34 (m, 4H), 1.31 – 1.21 (m, 1H).  $^{13}\text{C}$  NMR (126 MHz,  $\text{DMSO-}d_6$ )  $\delta$  177.6, 143.5, 142.0, 132.3, 130.4, 130.2, 121.4, 103.3, 49.3, 44.3, 39.1, 39.0, 32.4, 30.2, 27.9, 25.9, 24.4. LC/MS (CI):  $m/z = 329$   $[\text{M}+\text{H}]^+$ . Anal. calcd. for  $\text{C}_{17}\text{H}_{24}\text{N}_6\text{O}$ : C 62.17; H 7.37; N 25.59. Found: C 62.28; H 7.23; N 25.23.

**2-Cyclobutyl-1-(3-((4-(pyridin-2-yl)-1H-1,2,3-triazol-1-yl)methyl)pyrrolidin-1-yl)ethanone (15{8,10,10})**

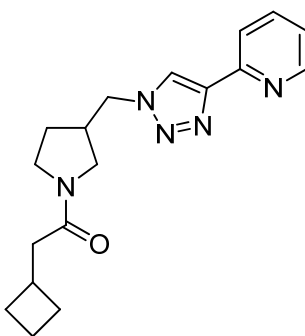

Brownish solid. The compound existed as a ca. 1:1 mixture of rotamers.  $^1\text{H}$  NMR (500 MHz,  $\text{DMSO-}d_6$ )  $\delta$  8.76 – 8.64 (m, 1H), 8.60 (s, 1H), 8.04 (s, 1H), 7.89 (t,  $J = 7.8$  Hz, 1H), 7.35 (s, 1H), 4.54 – 4.47 (m, 2H), 3.58 – 3.49 (m, 1H), 3.46 – 3.37 (m, 1.5H) and 3.28 – 3.17 (m, 1H) and 3.09 (dd,  $J = 11.8, 7.1$  Hz, 0.5H), 2.90 – 2.79 (m, 0.5H) and 2.77 – 2.70 (m, 0.5H), 2.63 – 2.54 (m, 1H), 2.39 – 2.27 (m, 2H), 2.05 – 1.95 (m, 2.5H) and 1.94 – 1.85 (m, 0.5H), 1.83 – 1.70 (m, 2.5H) and 1.66 – 1.56 (m, 2.5H).  $^{13}\text{C}$  NMR (126 MHz,  $\text{DMSO-}d_6$ )  $\delta$  170.1 and 170.0, 150.5, 150.0, 147.7, 137.6, 124.1, 123.5, 119.9, 52.0 and 52.0, 49.5 and 48.6, 45.6 and 44.7, 41.1 and 40.9, 38.1, 32.1 and 32.1, 29.4, 28.4 and 28.4, 28.4, 27.8, 18.8. LC/MS (CI):  $m/z = 326$   $[\text{M}+\text{H}]^+$ . Anal. calcd. for  $\text{C}_{18}\text{H}_{23}\text{N}_5\text{O}$ : C 66.44; H 7.12; N 21.52. Found: C 66.43; H 7.34; N 21.40.

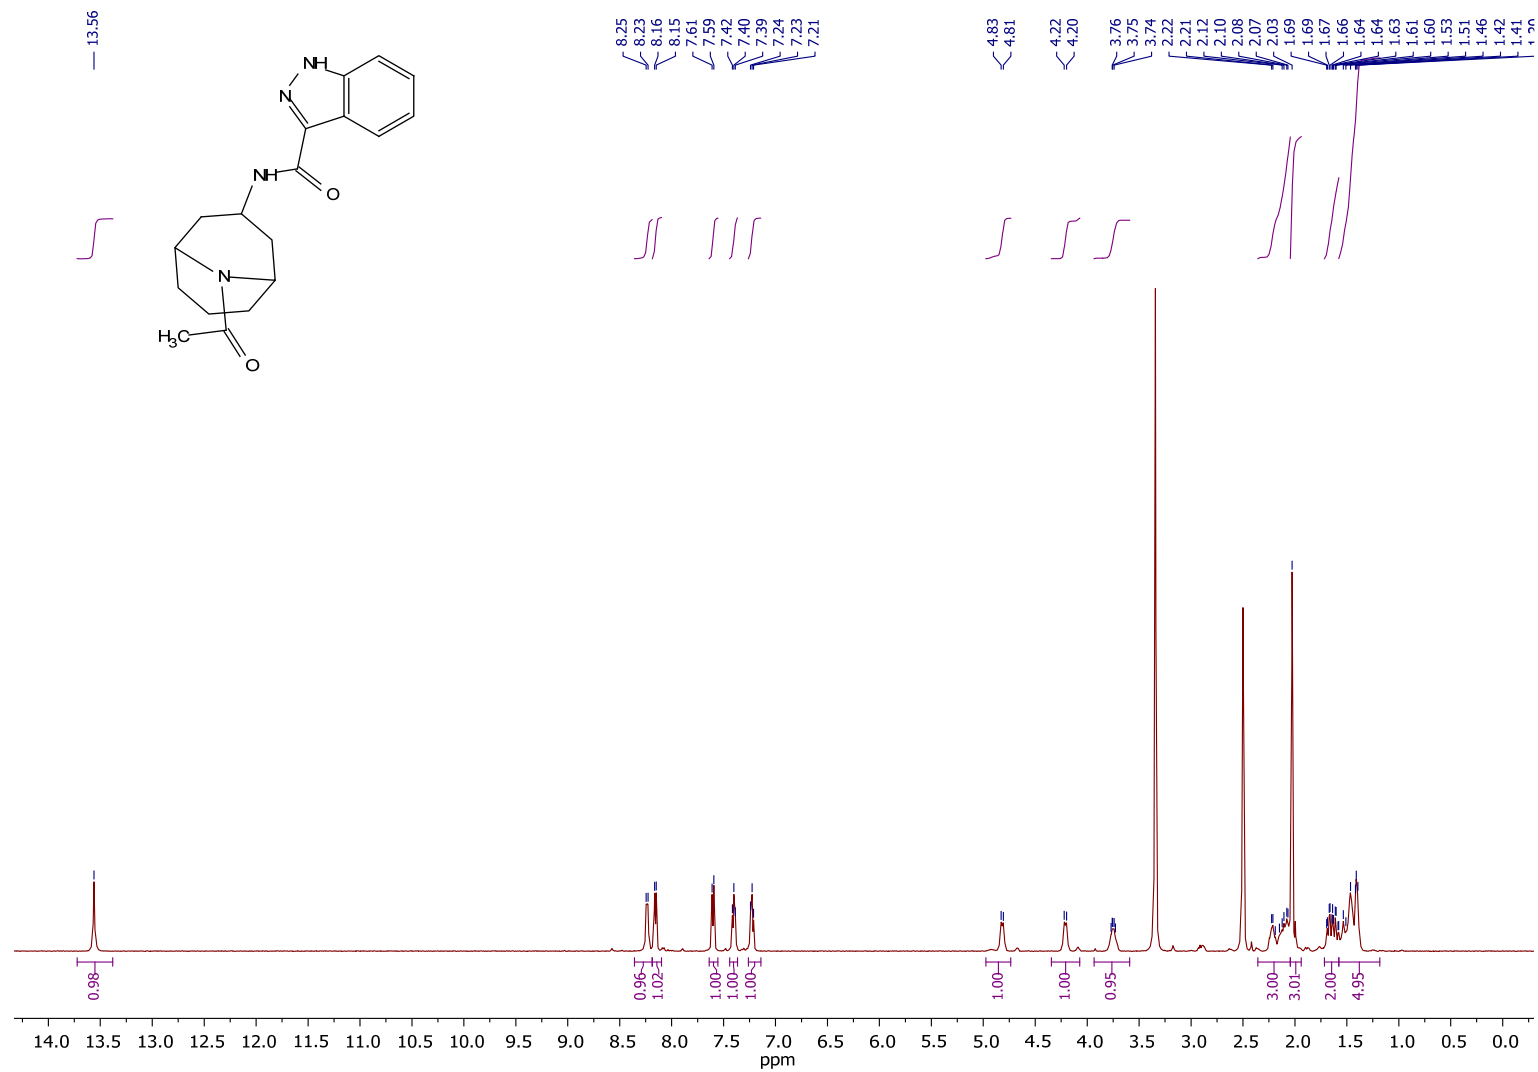

*N*-(9-Acetyl-9-azabicyclo[3.3.1]nonan-3-yl)-1*H*-indazole-3-carboxamide (**11**{52,55,23}), <sup>1</sup>H NMR (500 MHz, DMSO-*d*<sub>6</sub>)

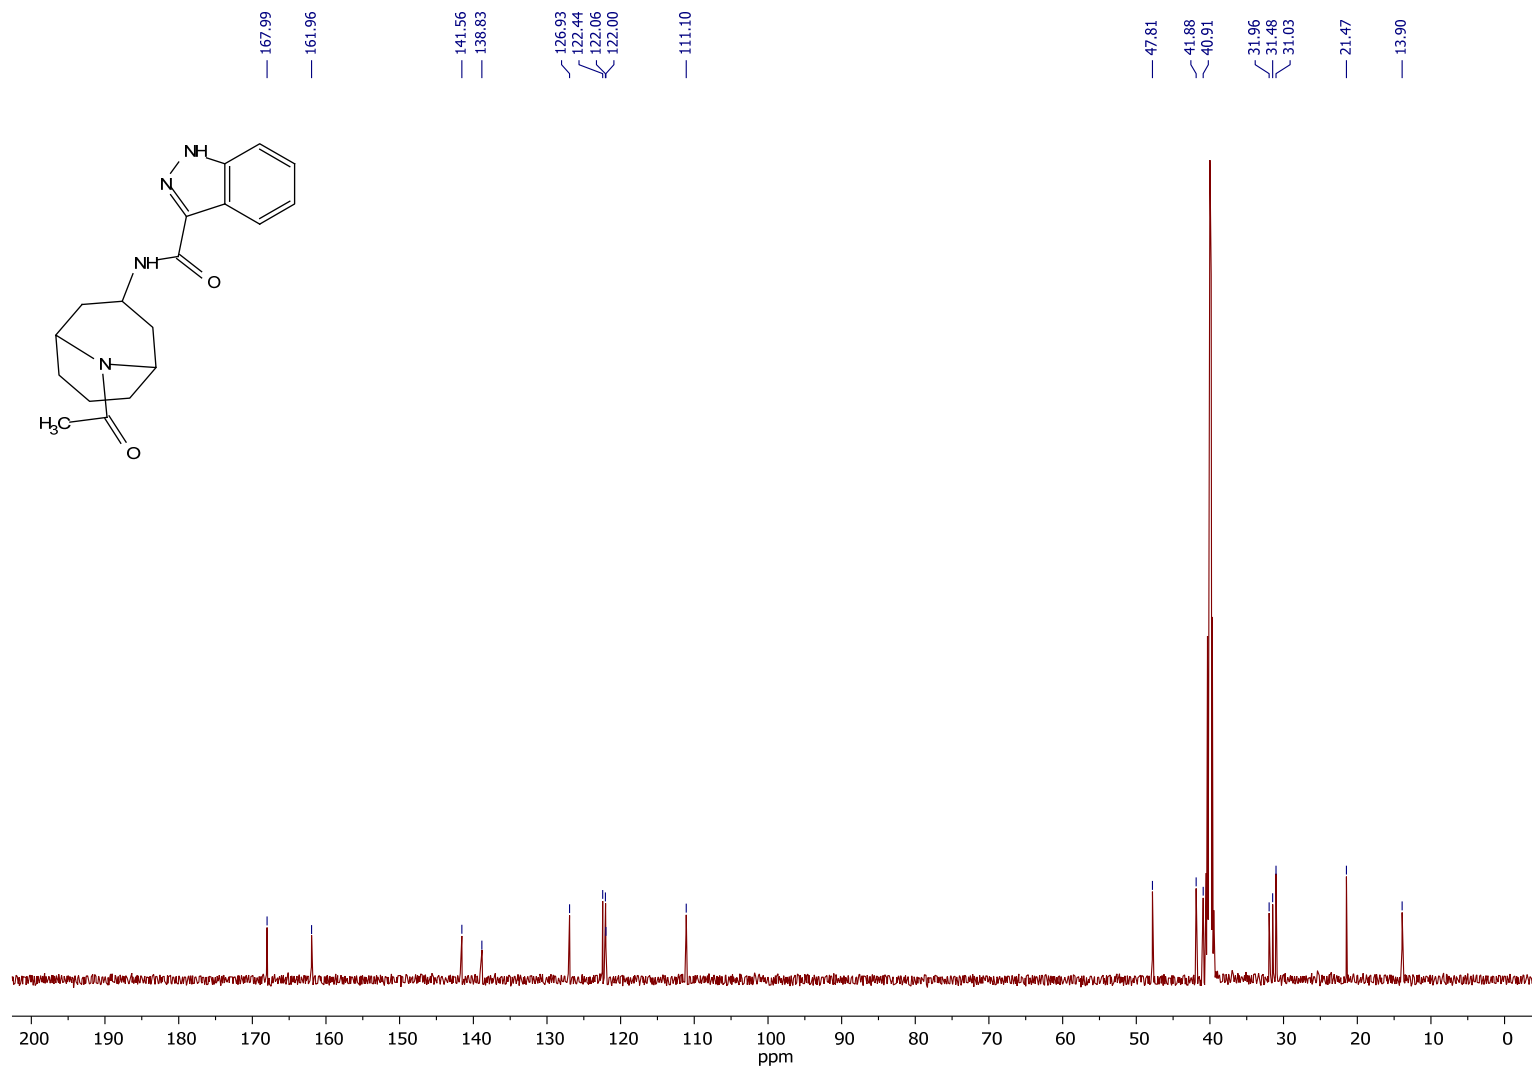

*N*-(9-Acetyl-9-azabicyclo[3.3.1]nonan-3-yl)-1*H*-indazole-3-carboxamide (**11** {52,55,23}), <sup>13</sup>C NMR (126 MHz, DMSO-*d*<sub>6</sub>)

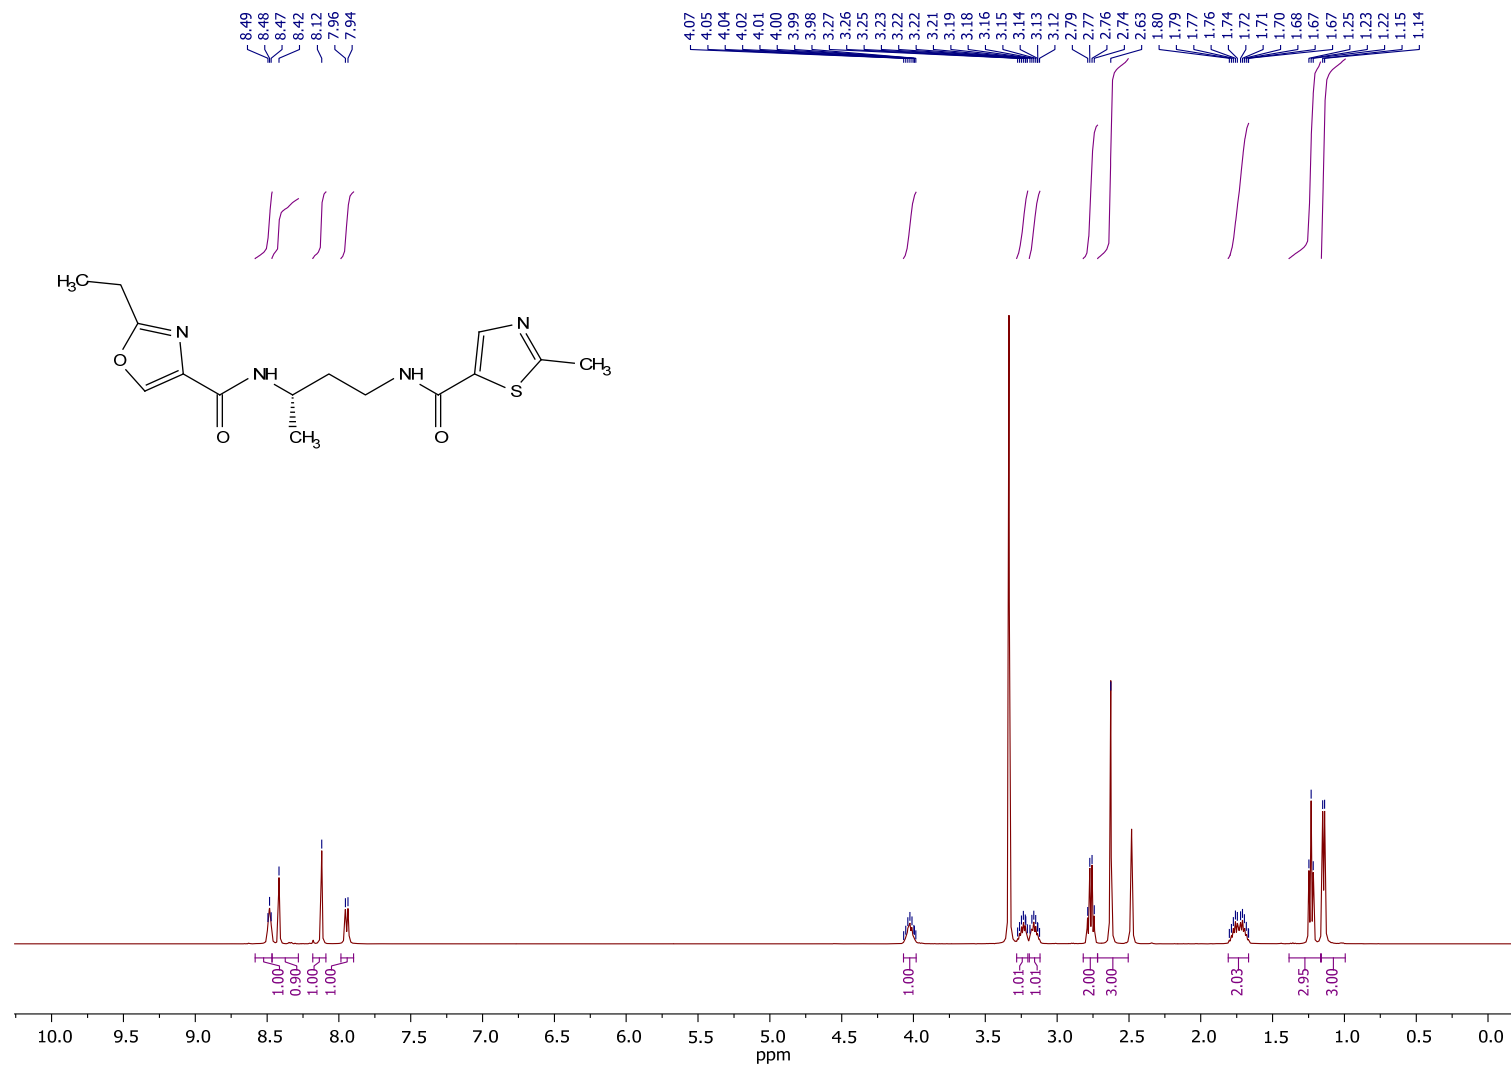

(*S*)-2-Ethyl-*N*-(4-(2-methylthiazole-5-carboxamido)butan-2-yl)oxazole-4-carboxamide (**11**{25,19,9}), <sup>1</sup>H NMR (500 MHz, DMSO-*d*<sub>6</sub>)

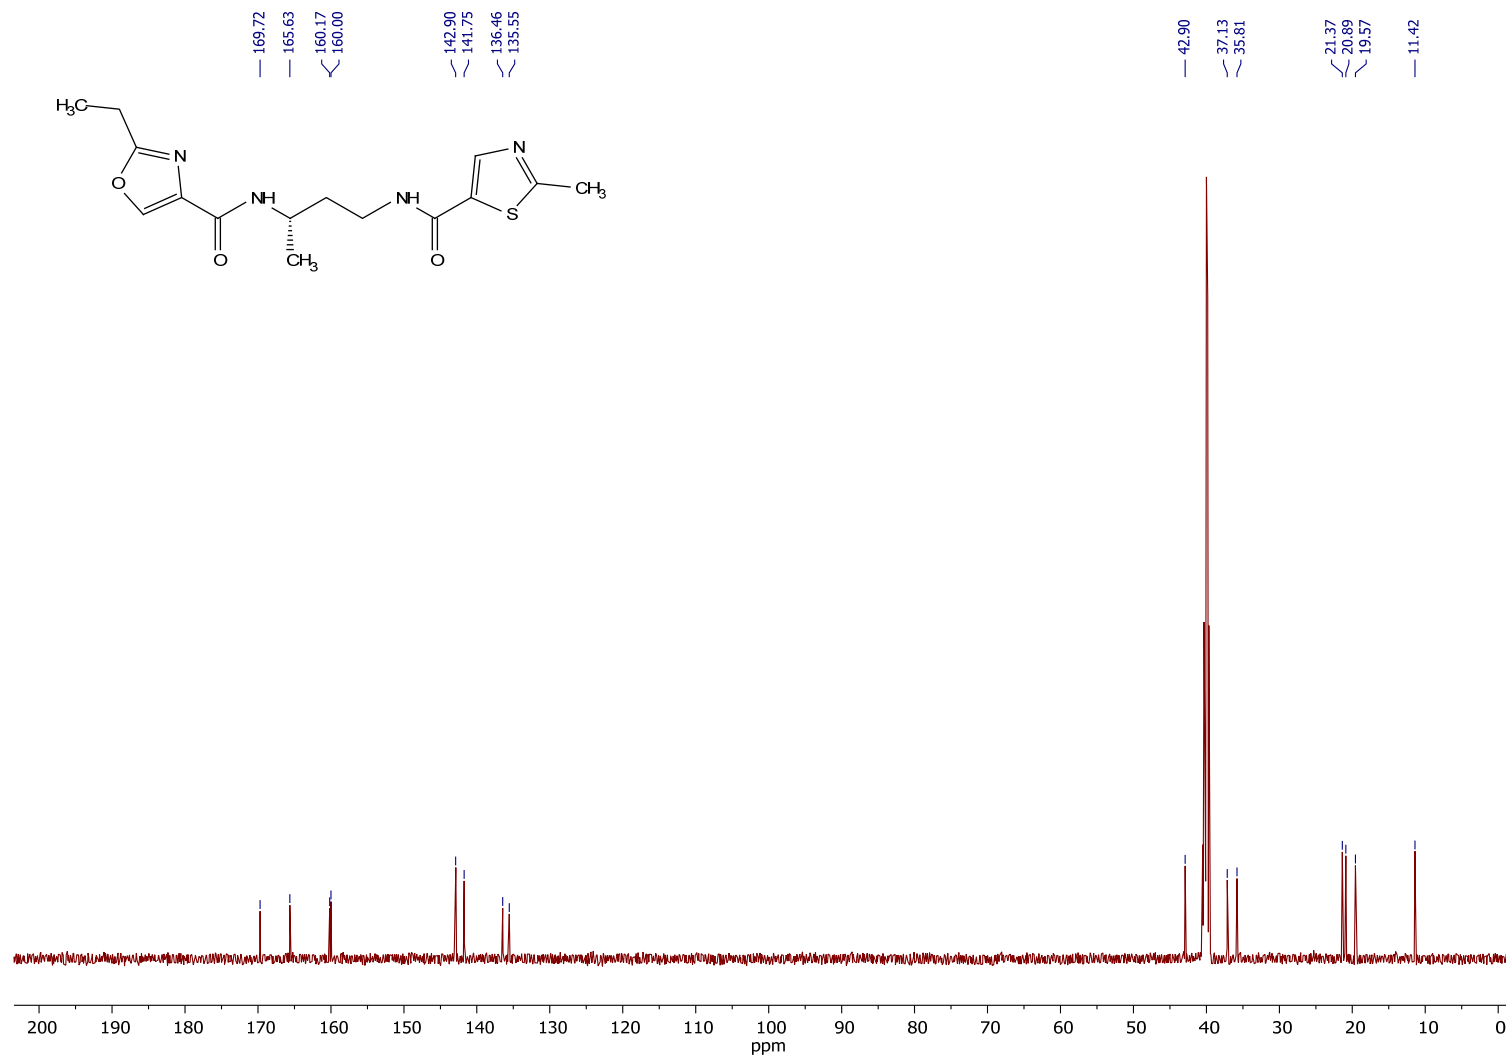

(S)-2-Ethyl-N-(4-(2-methylthiazole-5-carboxamido)butan-2-yl)oxazole-4-carboxamide (**11**{25,19,9}), <sup>13</sup>C NMR (126 MHz, DMSO-*d*<sub>6</sub>)

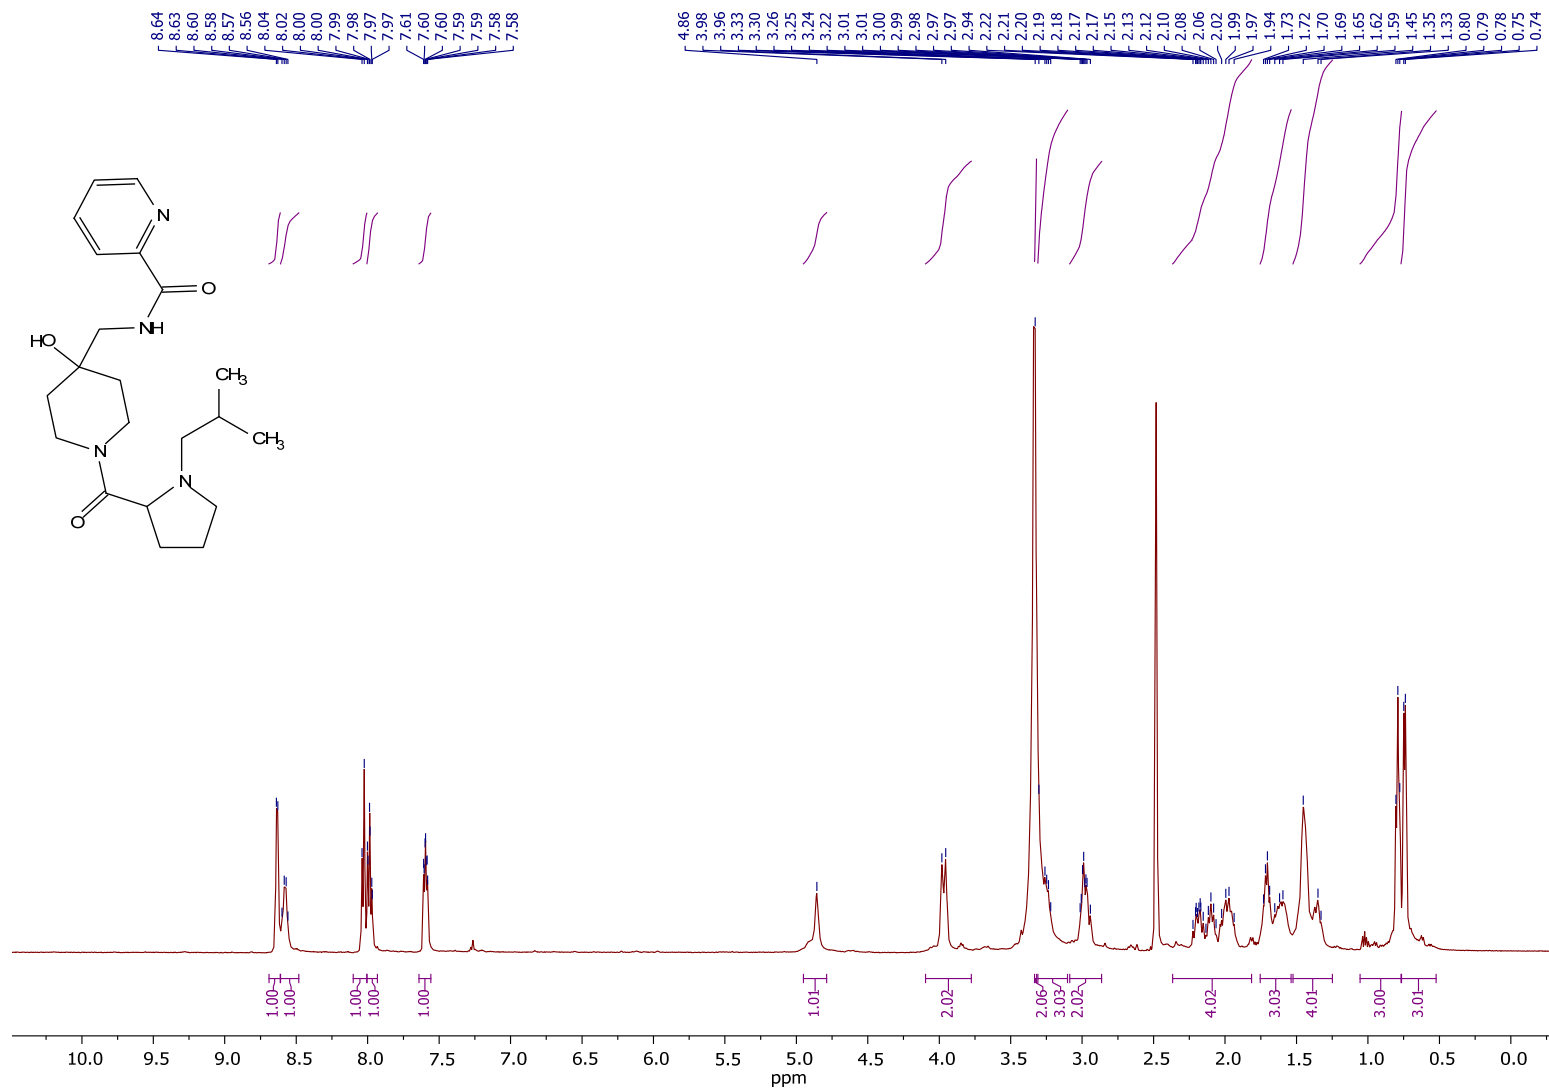

*N*-((4-Hydroxy-1-(isobutylpropyl)piperidin-4-yl)methyl)picolinamide (**11**{24,21,10}), <sup>1</sup>H NMR (500 MHz, DMSO-d<sub>6</sub>)



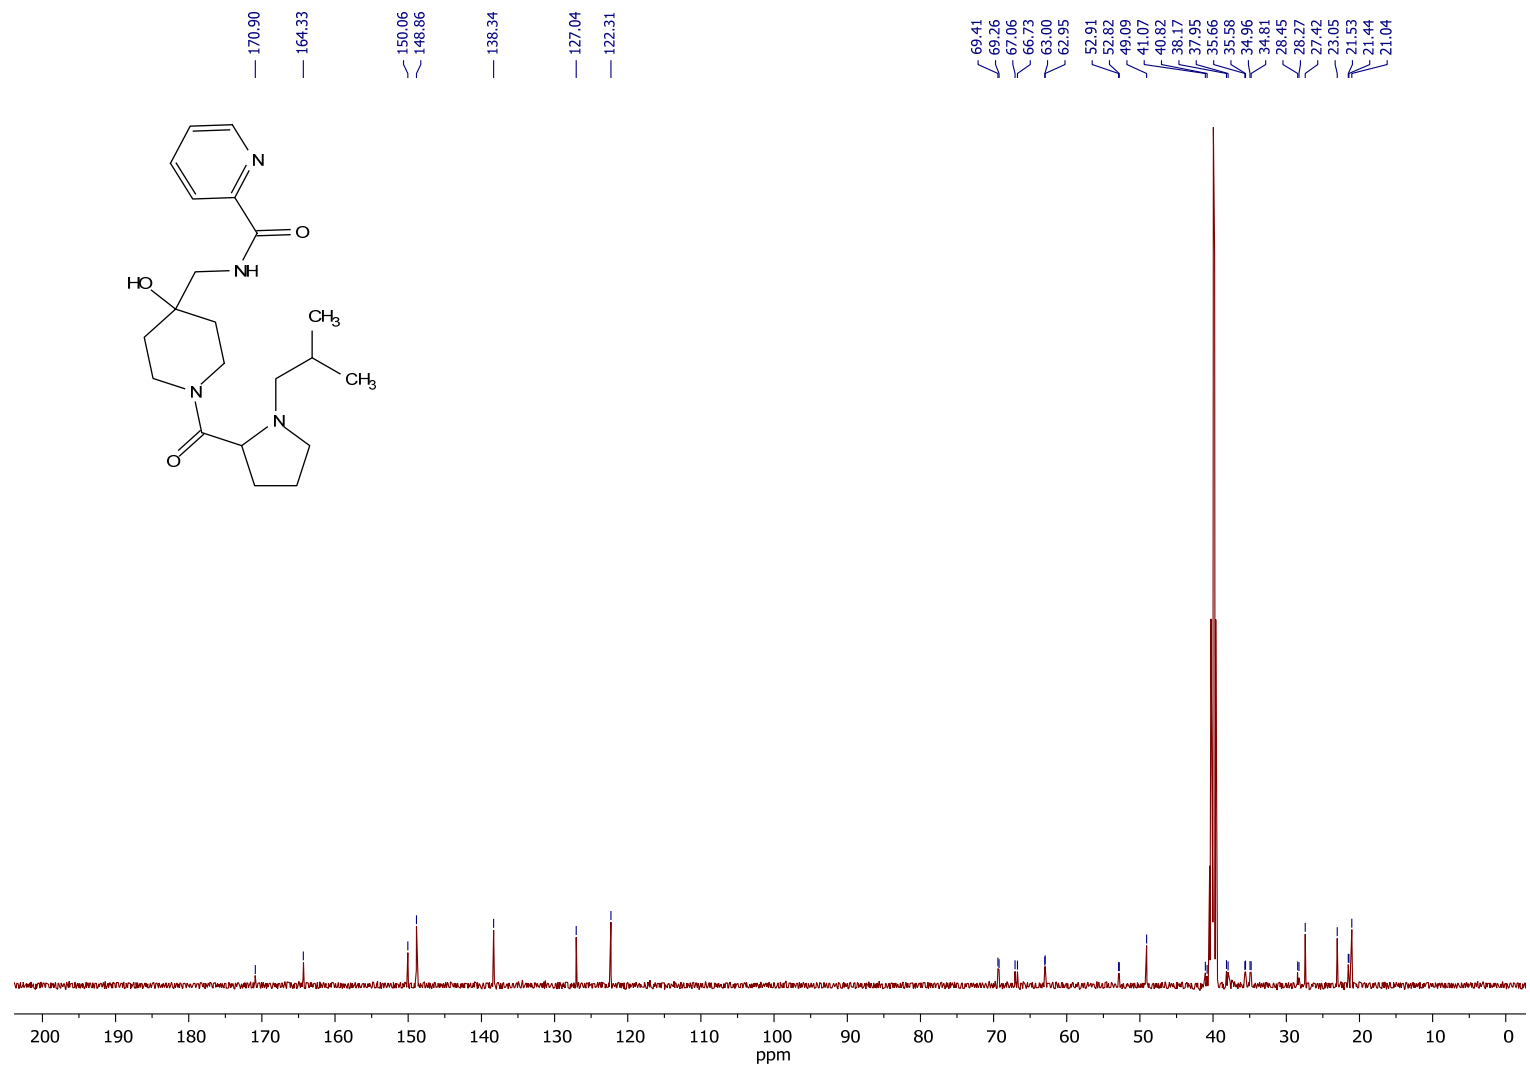

*N*-((4-Hydroxy-1-(isobutylpropyl)piperidin-4-yl)methyl)picolinamide (**11**{24,21,10}),  $^{13}\text{C}$  NMR (126 MHz, DMSO- $d_6$ )

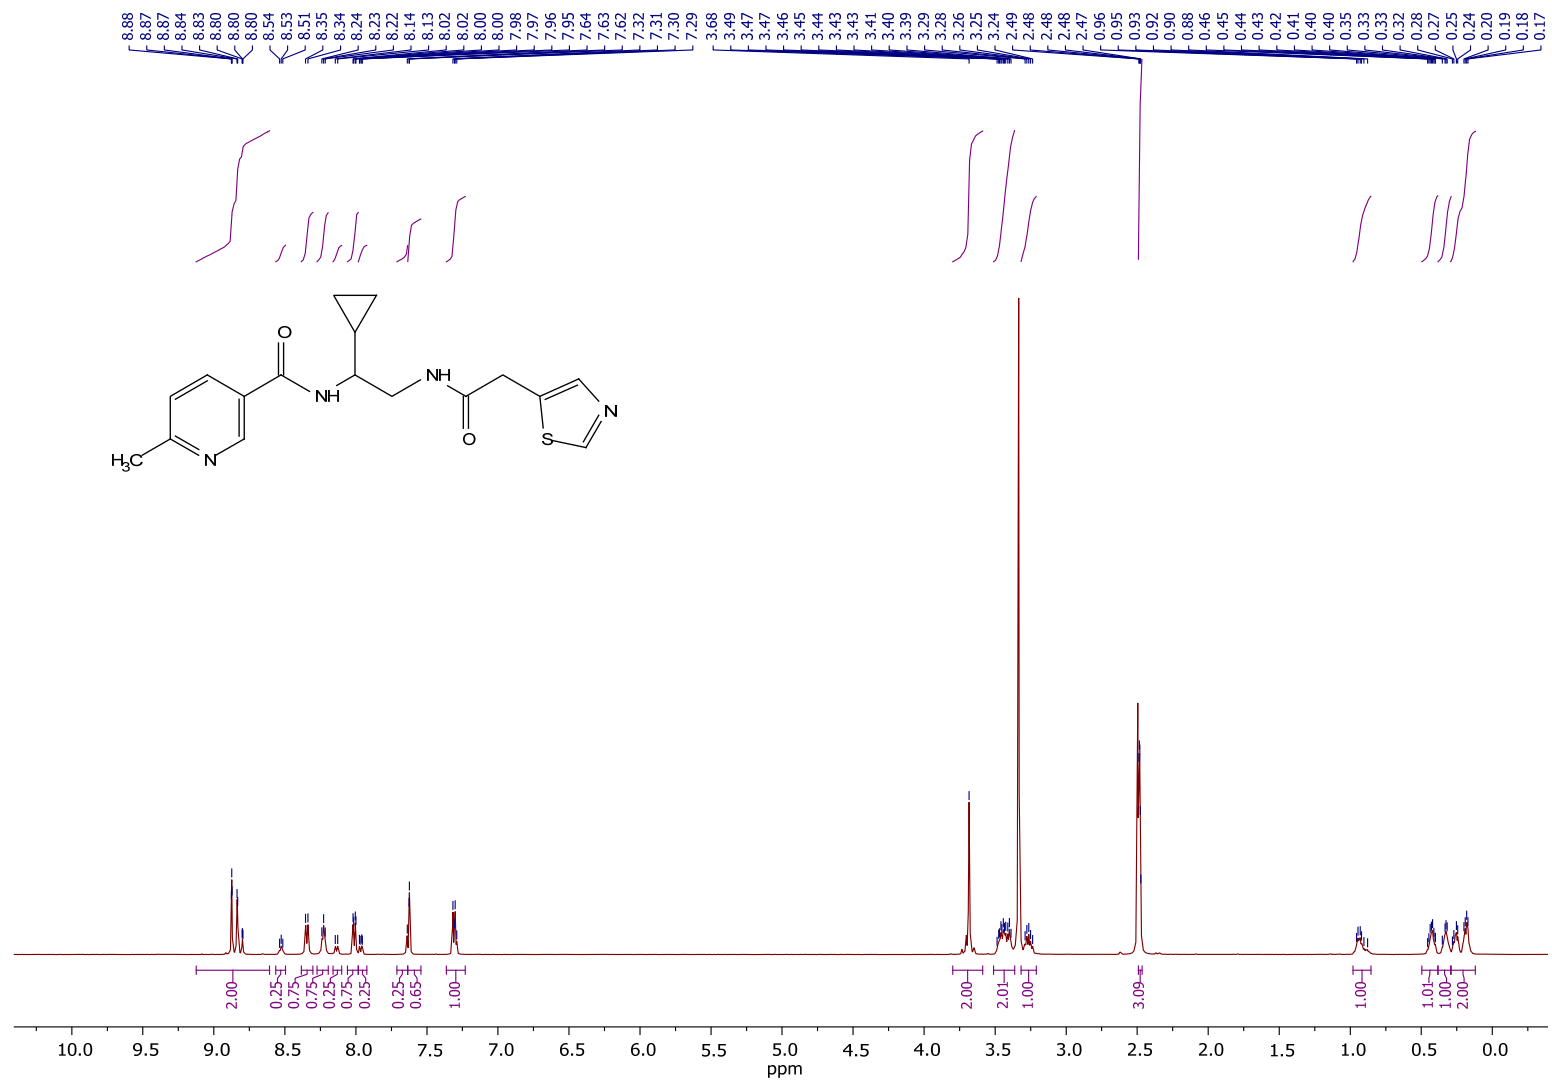

*N*-(1-Cyclopropyl-2-(2-(thiazol-5-yl)acetamido)ethyl)-6-methylnicotinamide (**11** {30,17,13}), <sup>1</sup>H NMR (500 MHz, DMSO-d<sub>6</sub>)

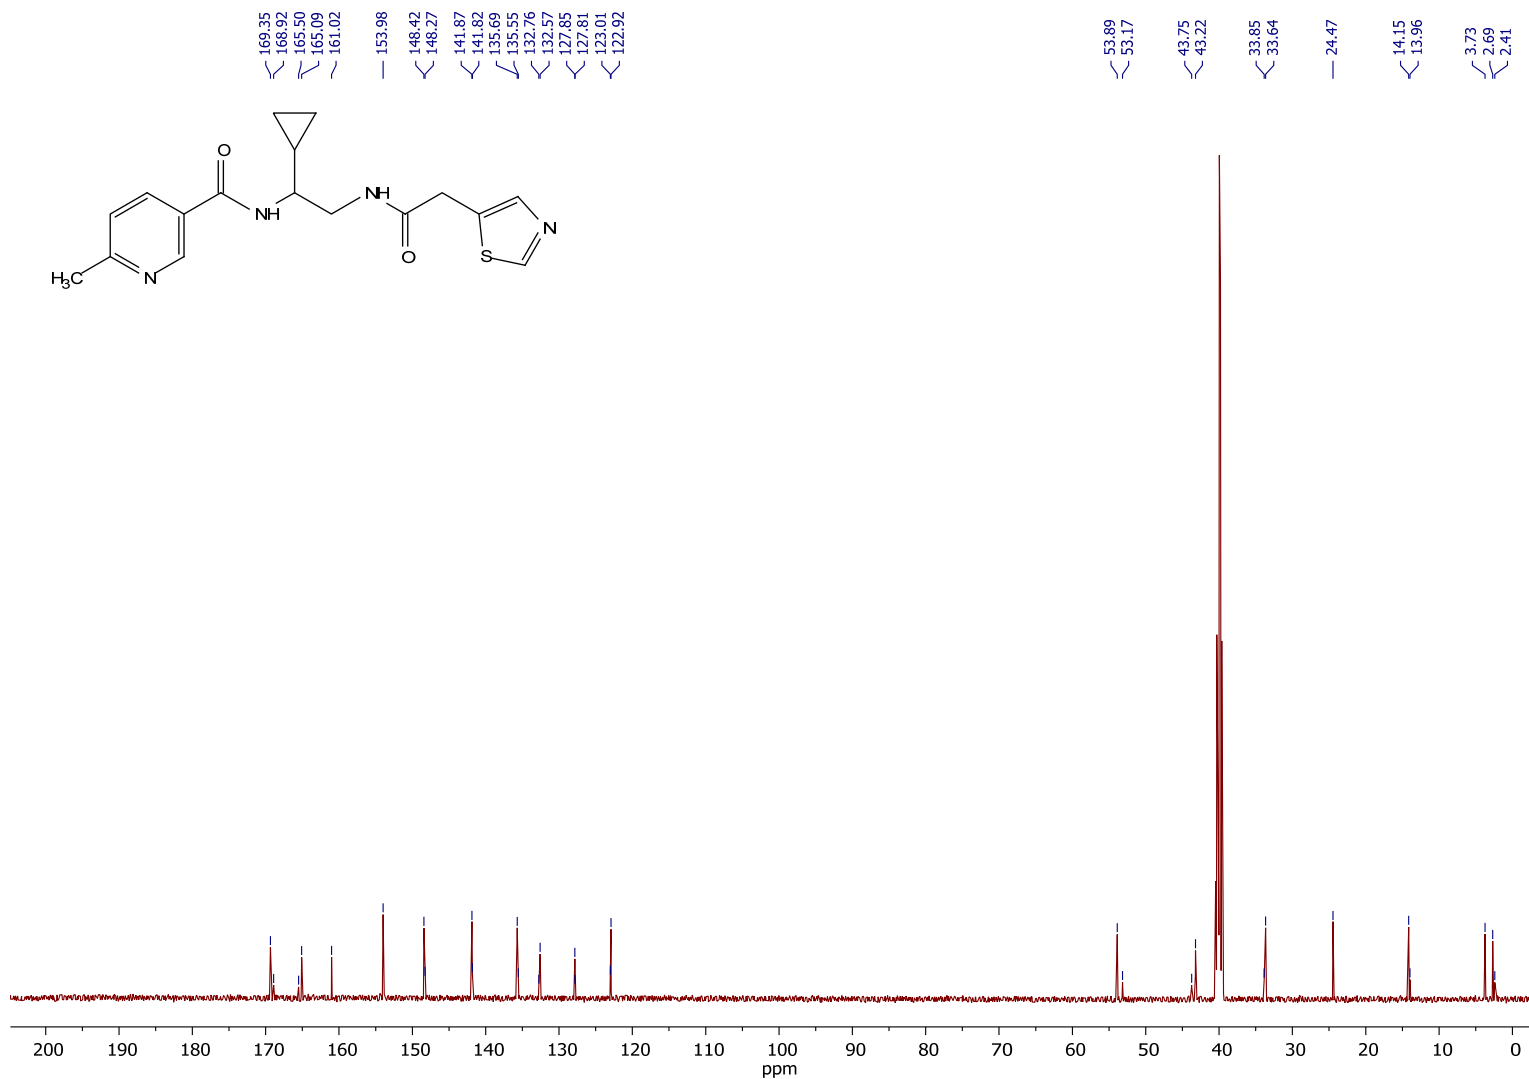

*N*-(1-Cyclopropyl-2-(2-(thiazol-5-yl)acetamido)ethyl)-6-methylnicotinamide (11{30,17,13}), <sup>13</sup>C NMR (126 MHz, DMSO-*d*<sub>6</sub>)

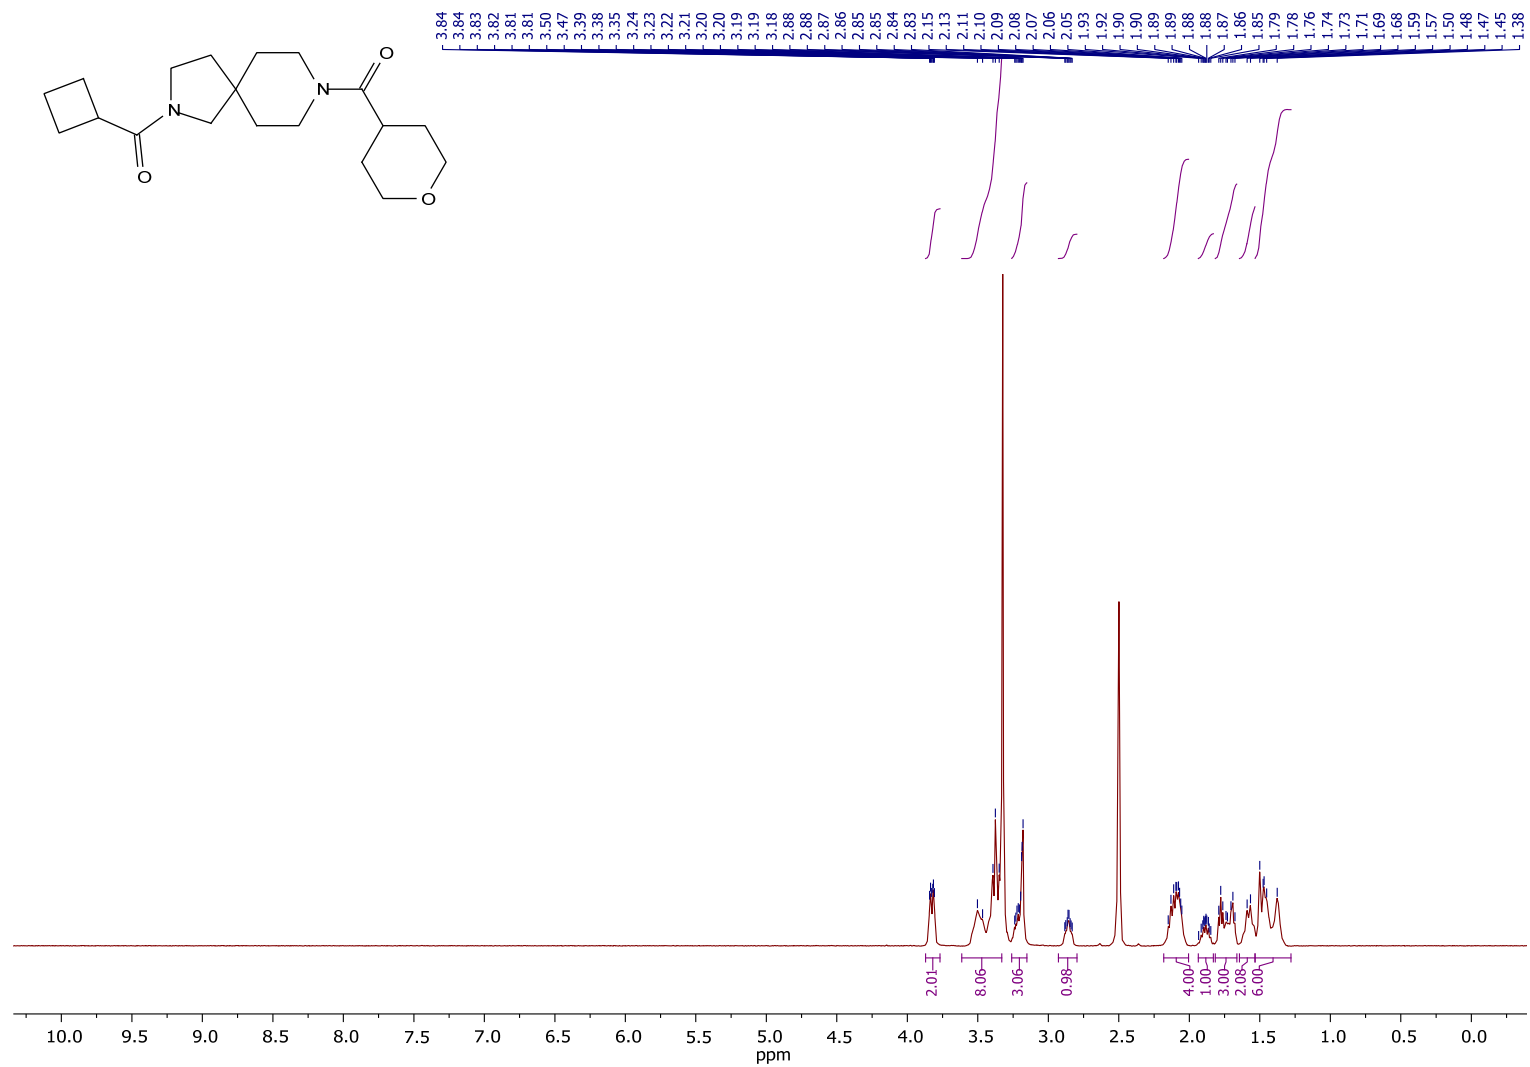

(2-(Cyclobutanecarbonyl)-2,8-diazaspiro[4.5]decan-8-yl)(tetrahydro-2H-pyran-4-yl)methanone (**11**{50,64,26}), <sup>1</sup>H NMR (500 MHz, DMSO-*d*<sub>6</sub>)

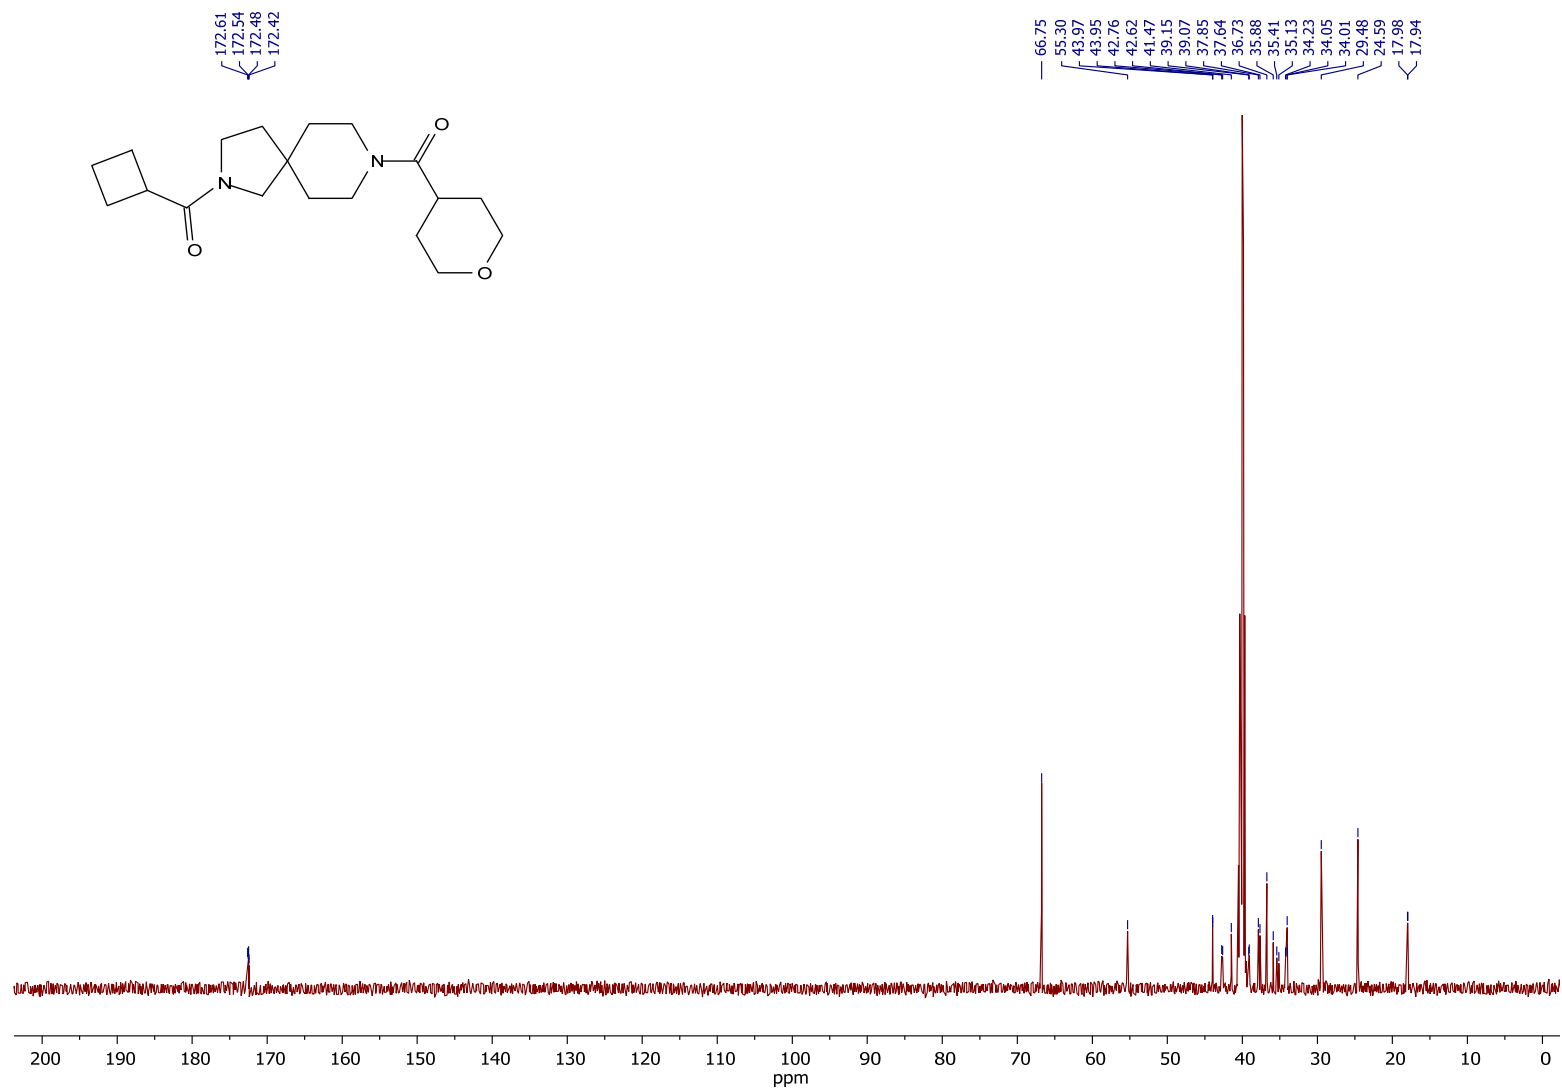

(2-(Cyclobutanecarbonyl)-2,8-diazaspiro[4.5]decan-8-yl)(tetrahydro-2H-pyran-4-yl)methanone (**11**<sub>{50,64,26}</sub>), <sup>13</sup>C NMR (126 MHz, DMSO-*d*<sub>6</sub>)

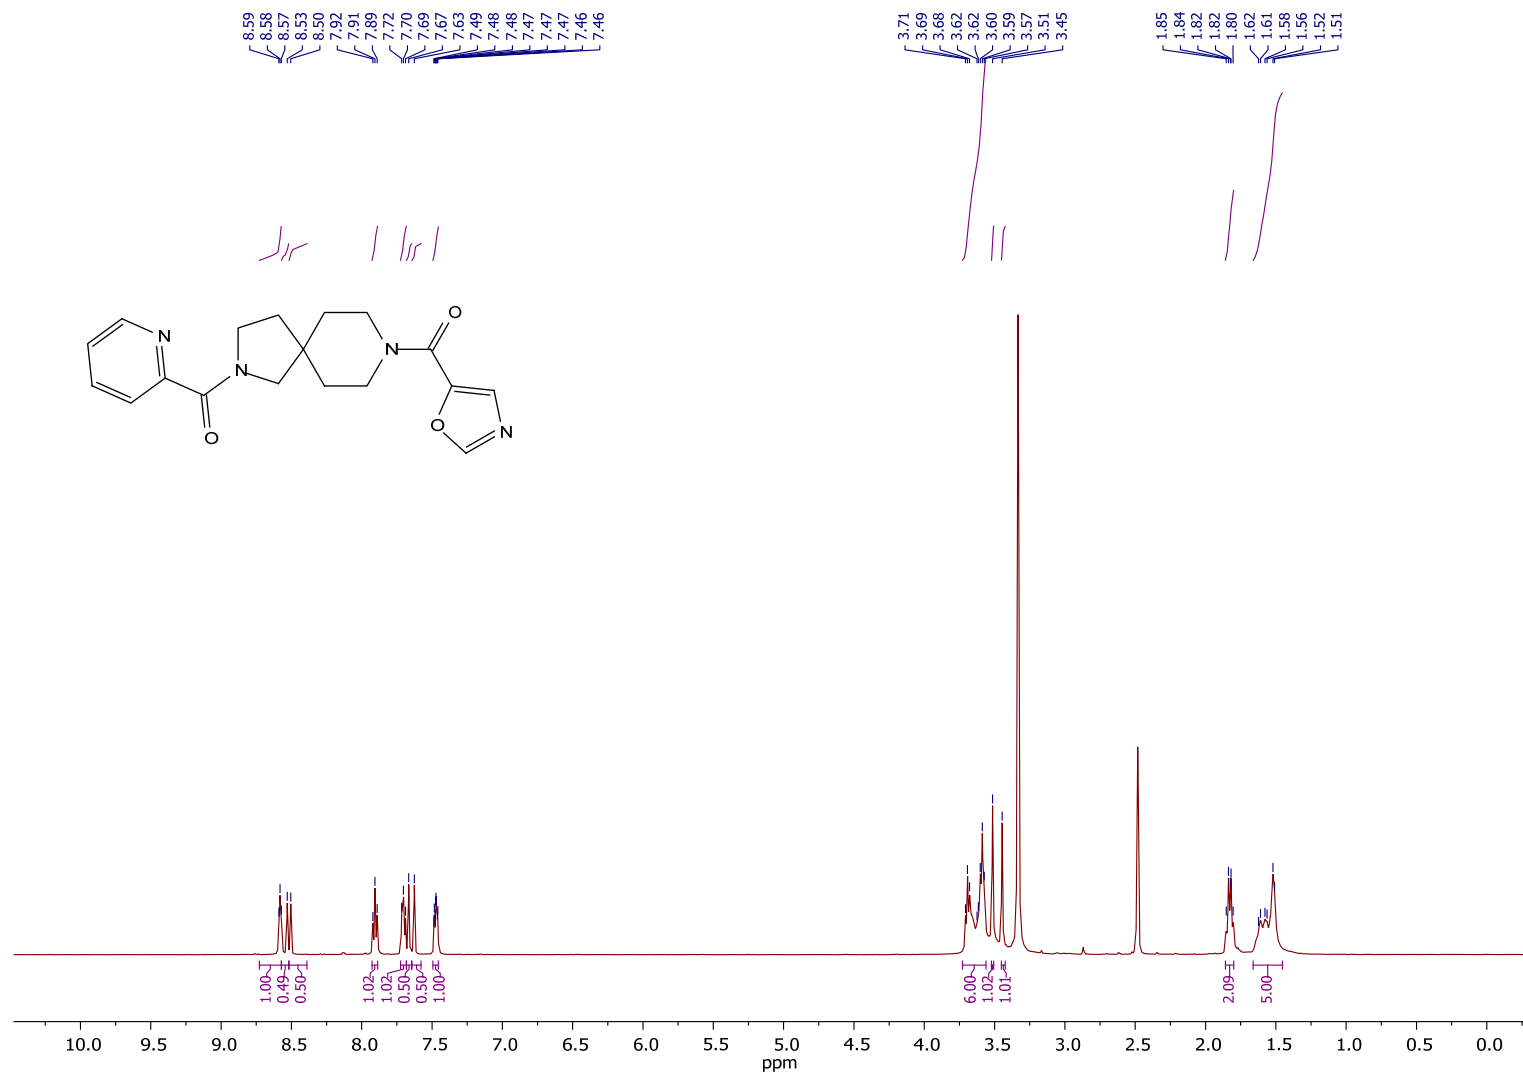

Oxazol-5-yl(2-picolinoyl-2,8-diazaspiro[4.5]decan-8-yl)methanone (**11**{50,69,10}), <sup>1</sup>H NMR (500 MHz, DMSO-d<sub>6</sub>)

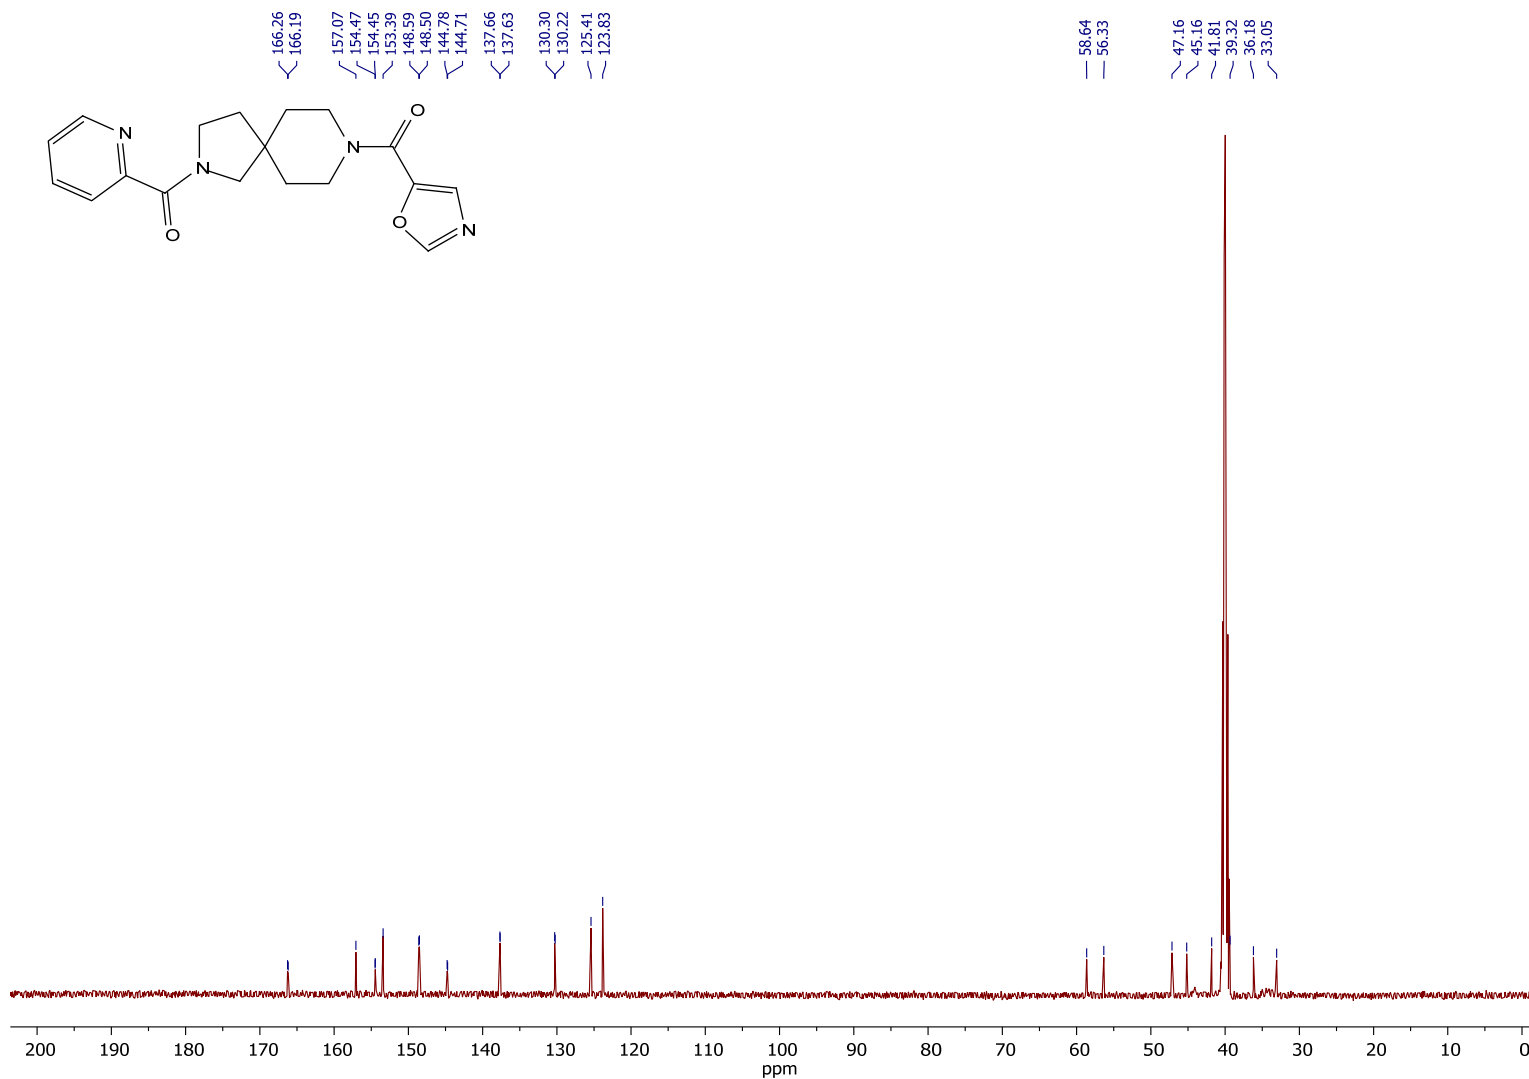

Oxazol-5-yl(2-picolinoyl-2,8-diazaspiro[4.5]decan-8-yl)methanone (**11** {50,69,10}),  $^{13}\text{C}$  NMR (126 MHz, DMSO- $d_6$ )

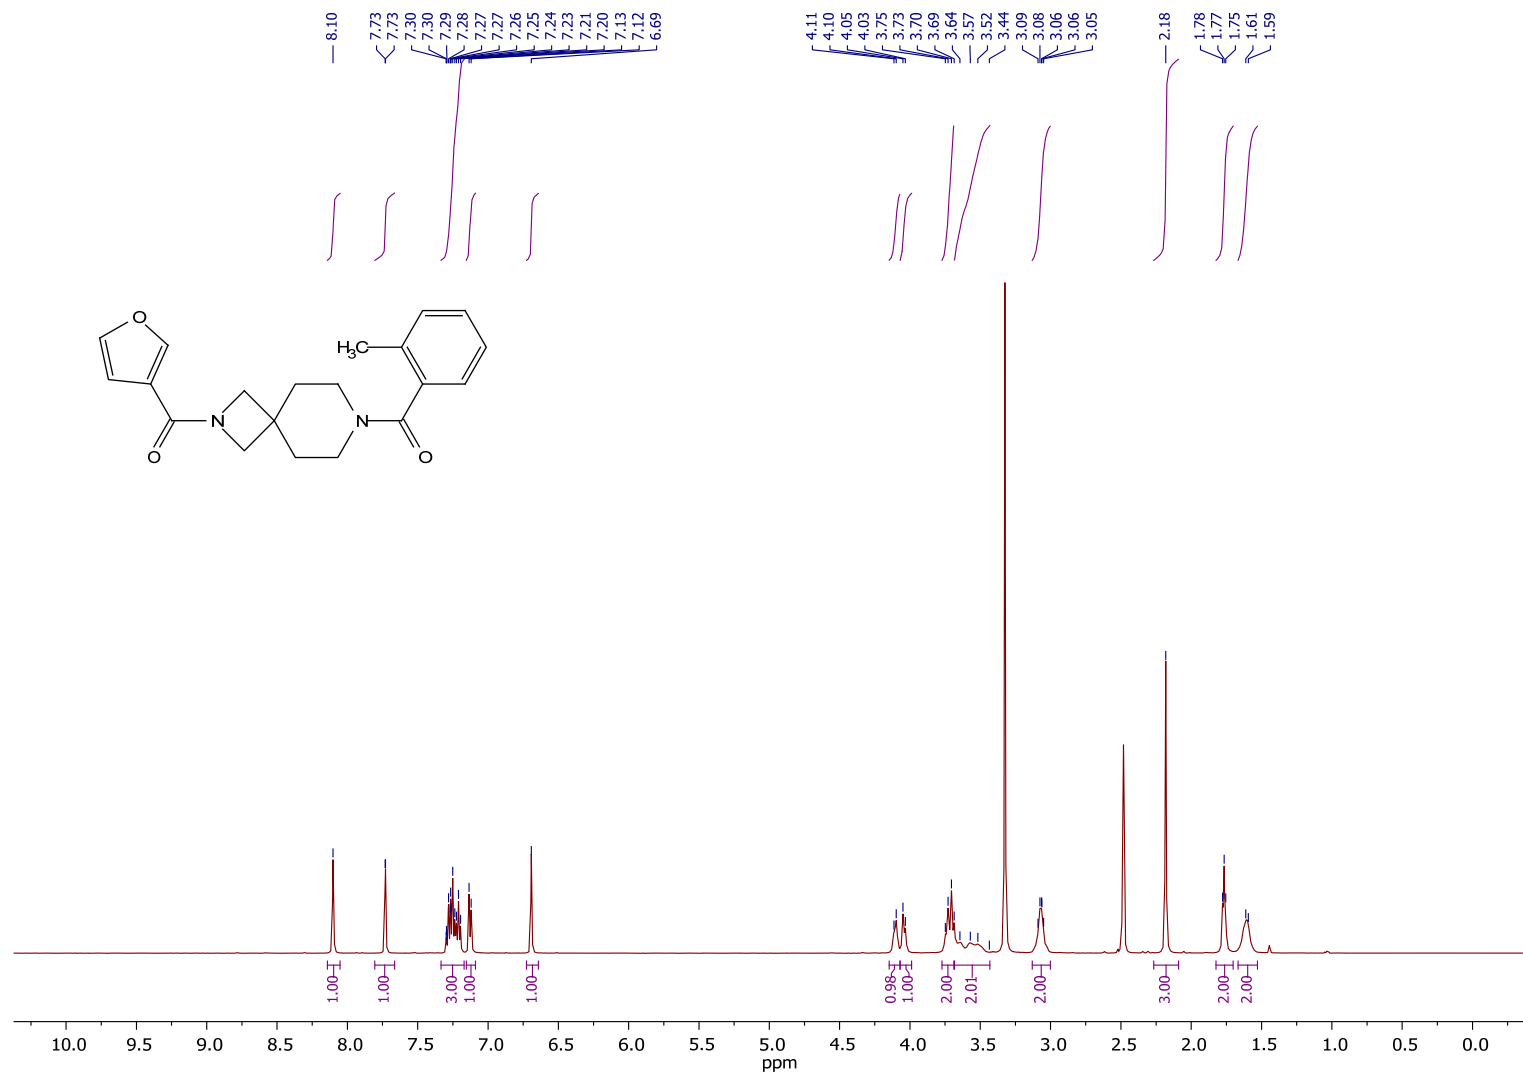

(2-(Furan-3-carbonyl)-2,7-diazaspiro[3.5]nonan-7-yl)(*o*-tolyl)methanone (**11**{60,73,32}), <sup>1</sup>H NMR (500 MHz, DMSO-*d*<sub>6</sub>)



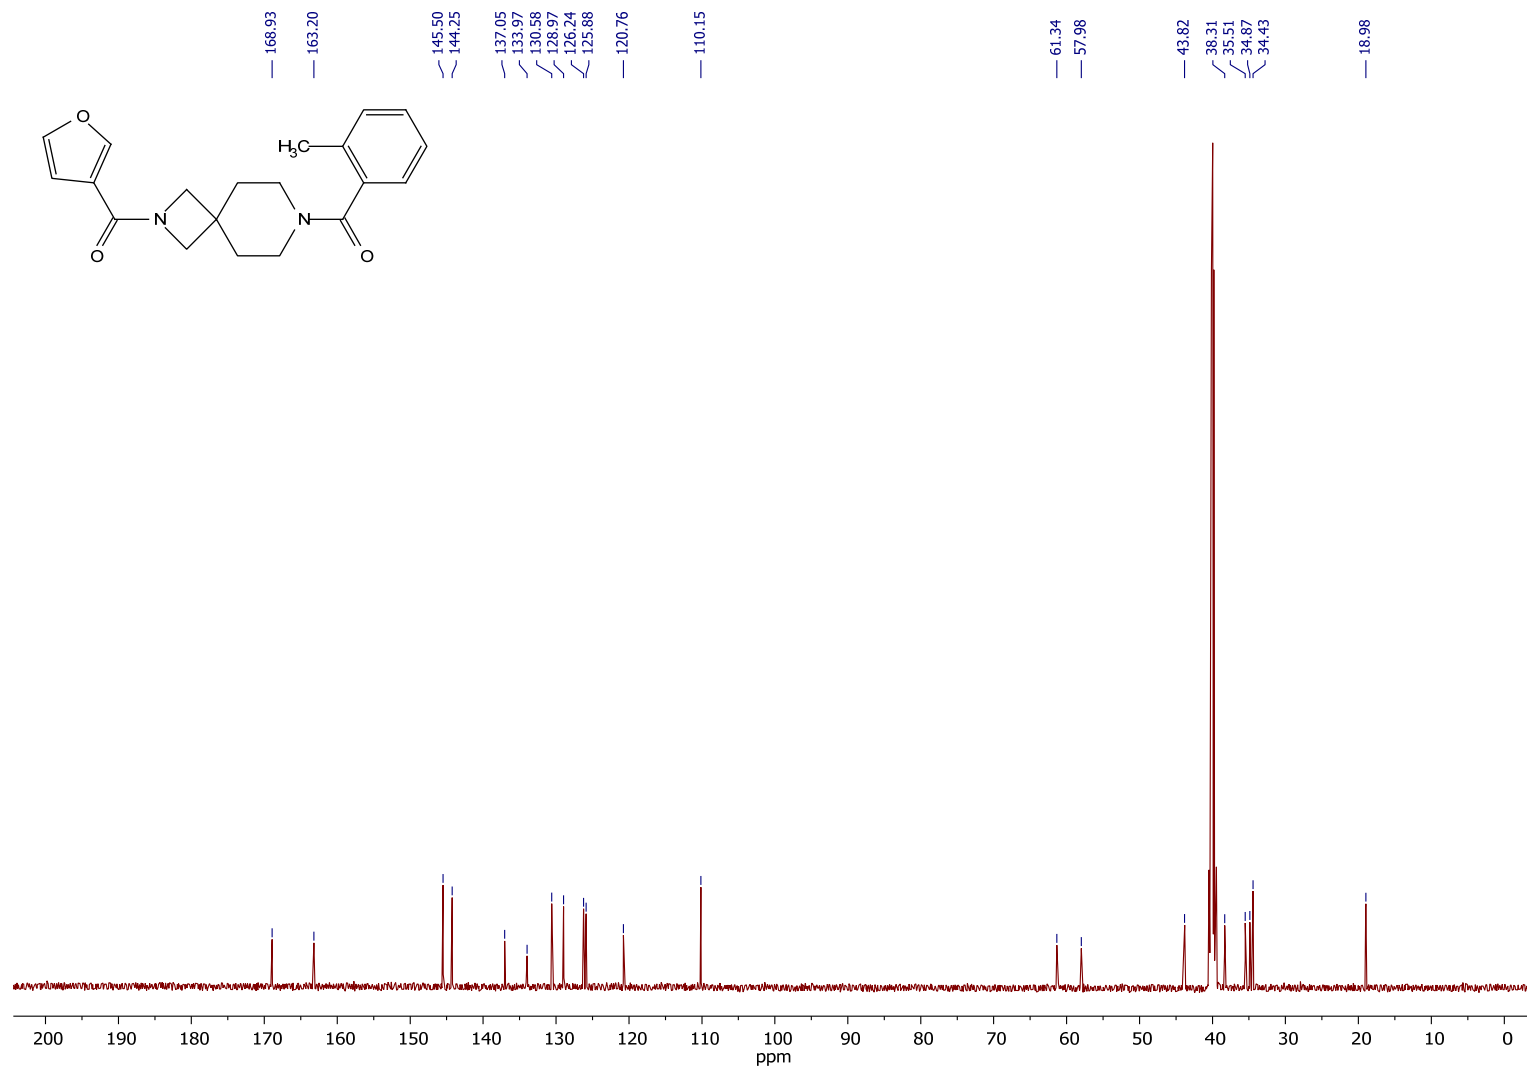

(2-(Furan-3-carbonyl)-2,7-diazaspiro[3.5]nonan-7-yl)(*o*-tolyl)methanone (**11**{60,73,32}),  $^{13}\text{C}$  NMR (126 MHz, DMSO- $d_6$ )

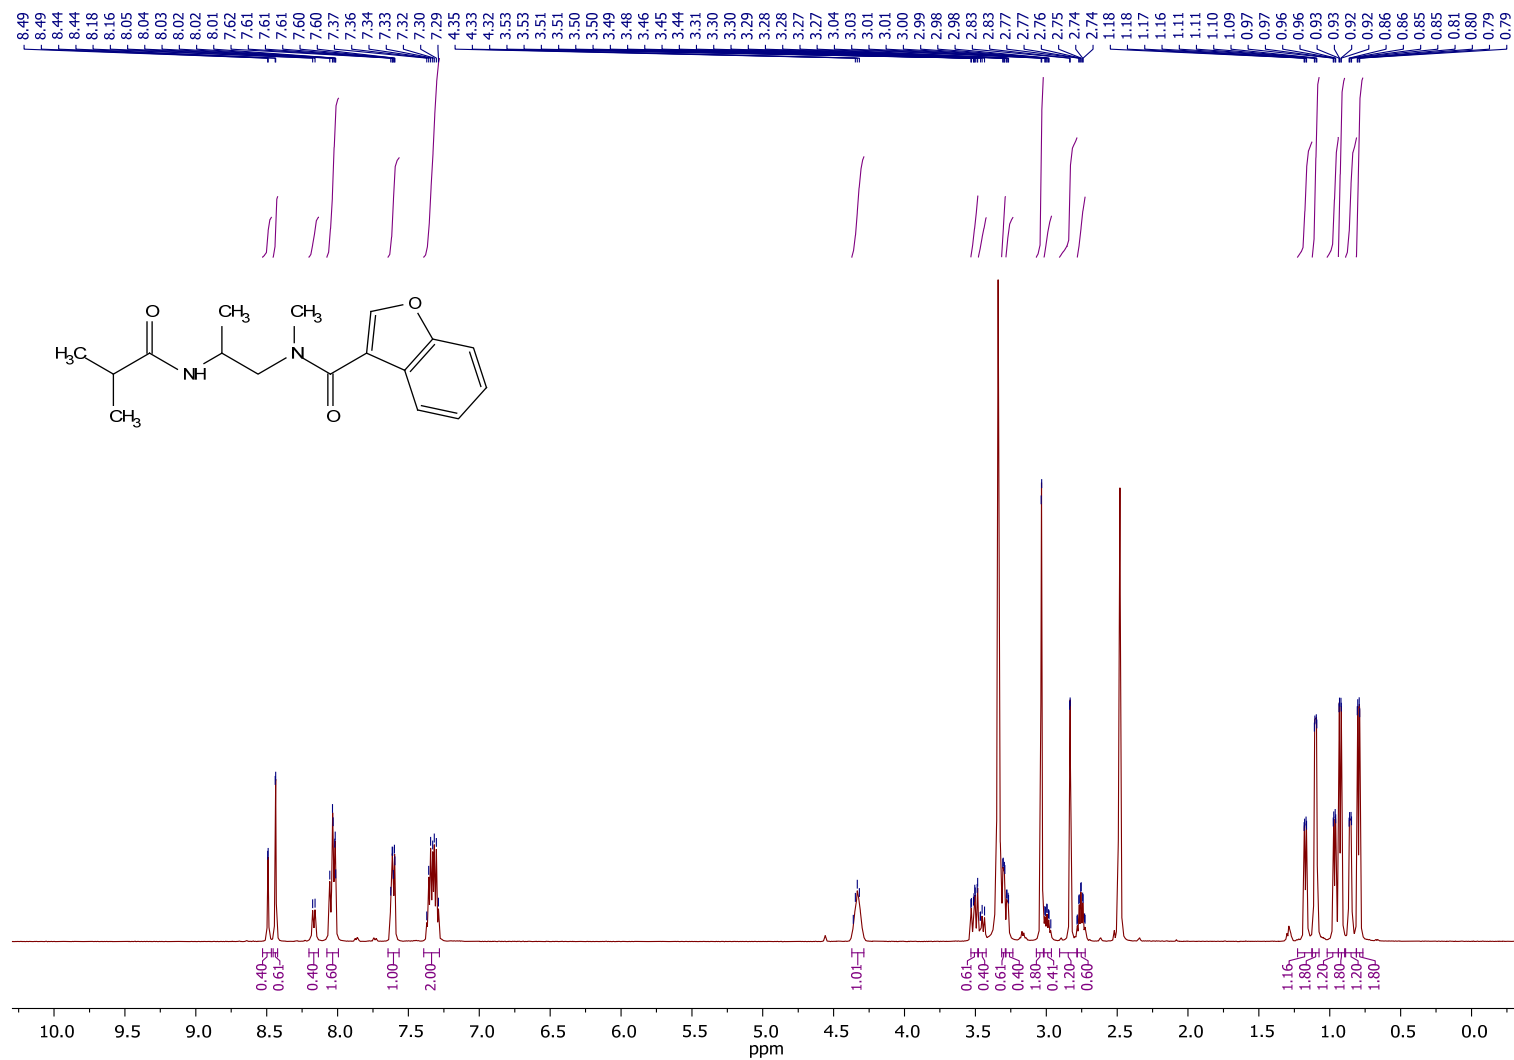

*N*-(2-isobutyramidopropyl)-*N*-methylbenzofuran-3-carboxamide (**11** {67,81,37}), <sup>1</sup>H NMR (500 MHz, DMSO-*d*<sub>6</sub>)

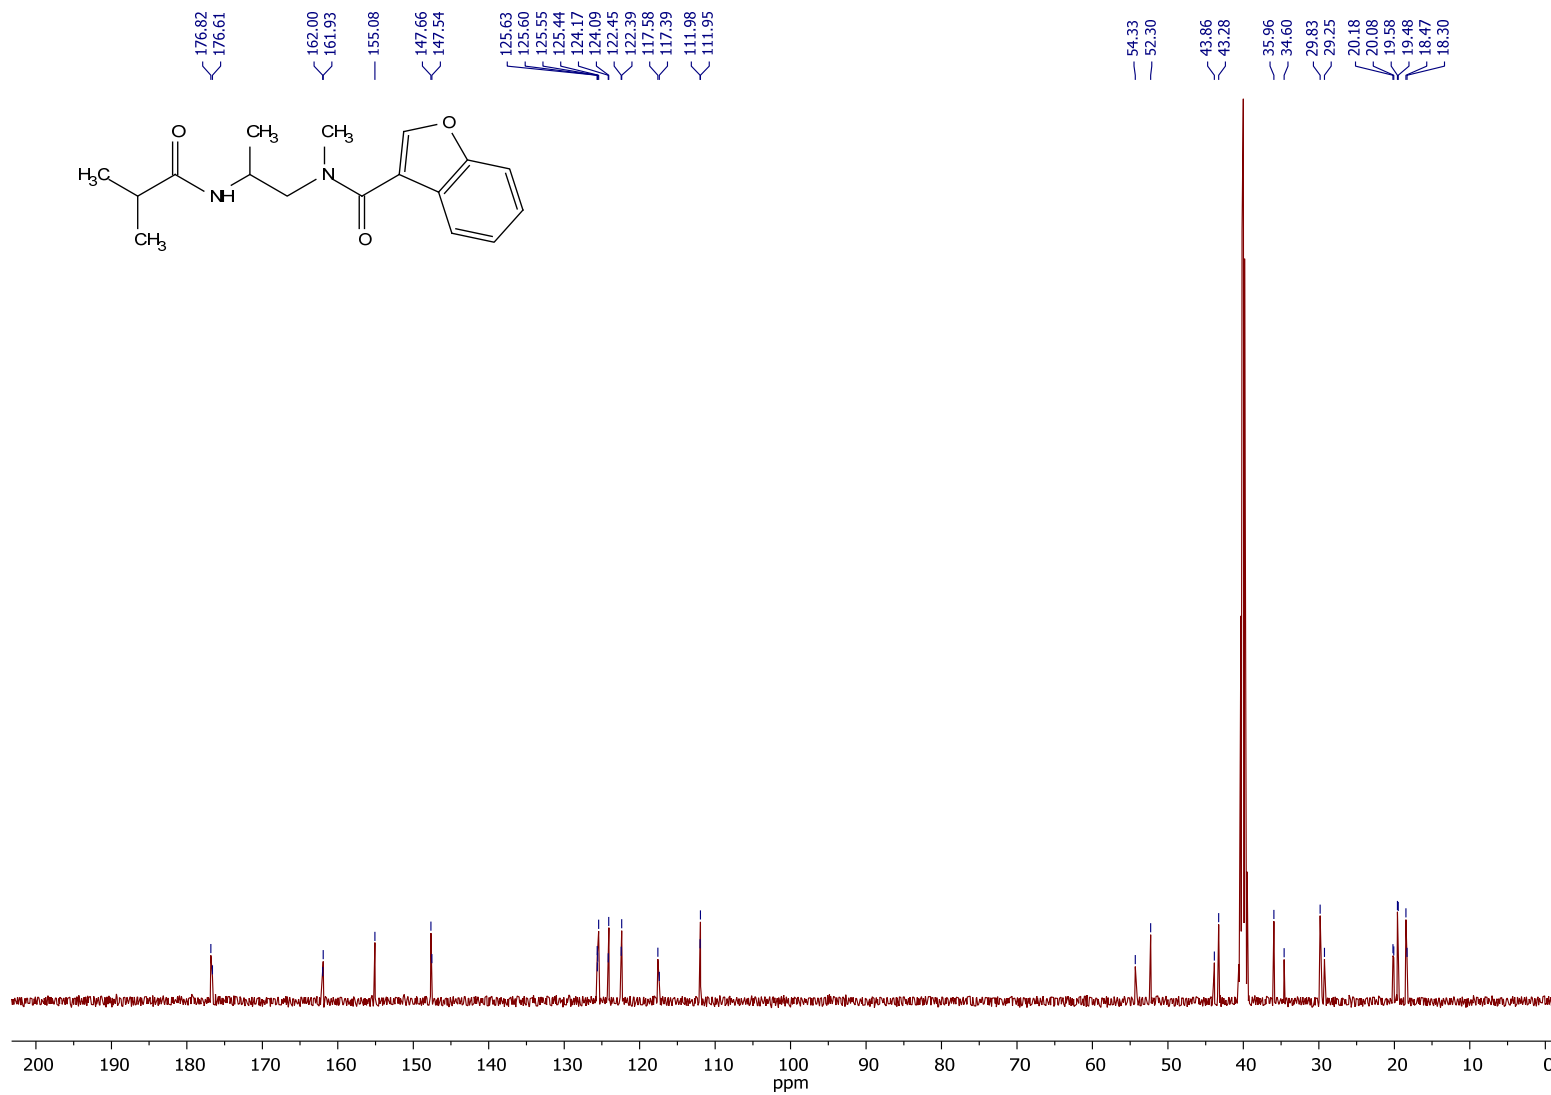

*N*-(2-Isobutyramidopropyl)-*N*-methylbenzofuran-3-carboxamide (11{67,81,37}), <sup>13</sup>C NMR (126 MHz, DMSO-*d*<sub>6</sub>)

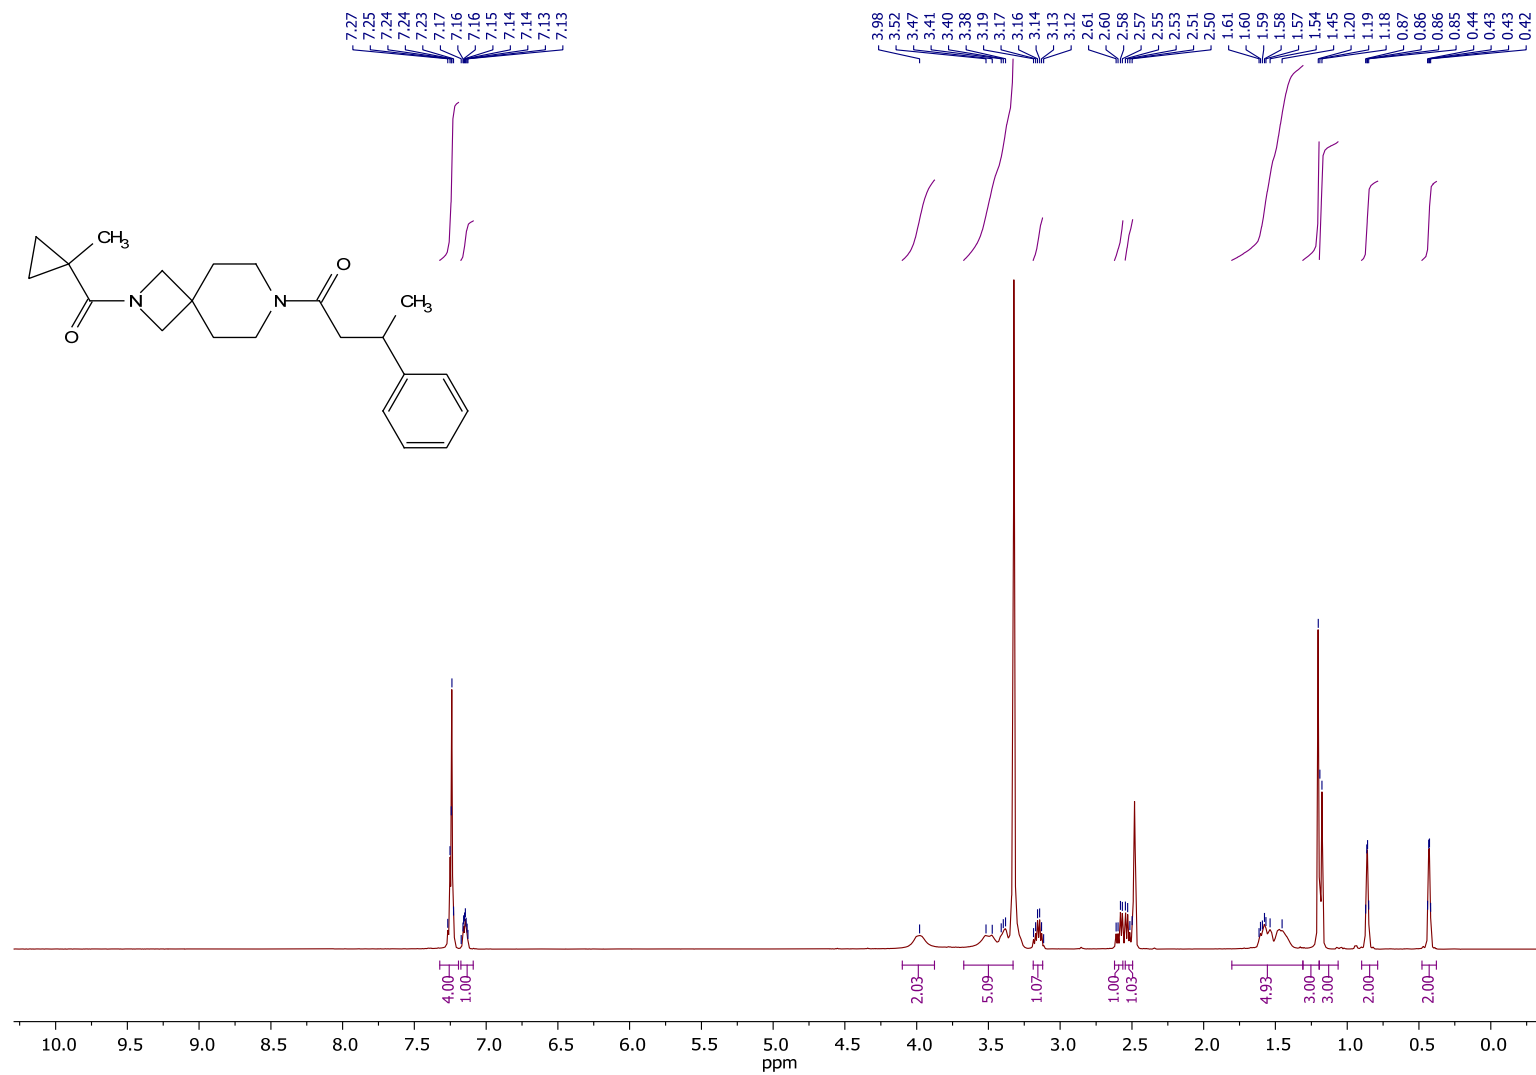

1-(2-(1-Methylcyclopropane-1-carbonyl)-2,7-diazaspiro[3.5]nonan-7-yl)-3-phenylbutan-1-one (**11**{60,102,51}), <sup>1</sup>H NMR (500 MHz, DMSO-d<sub>6</sub>)

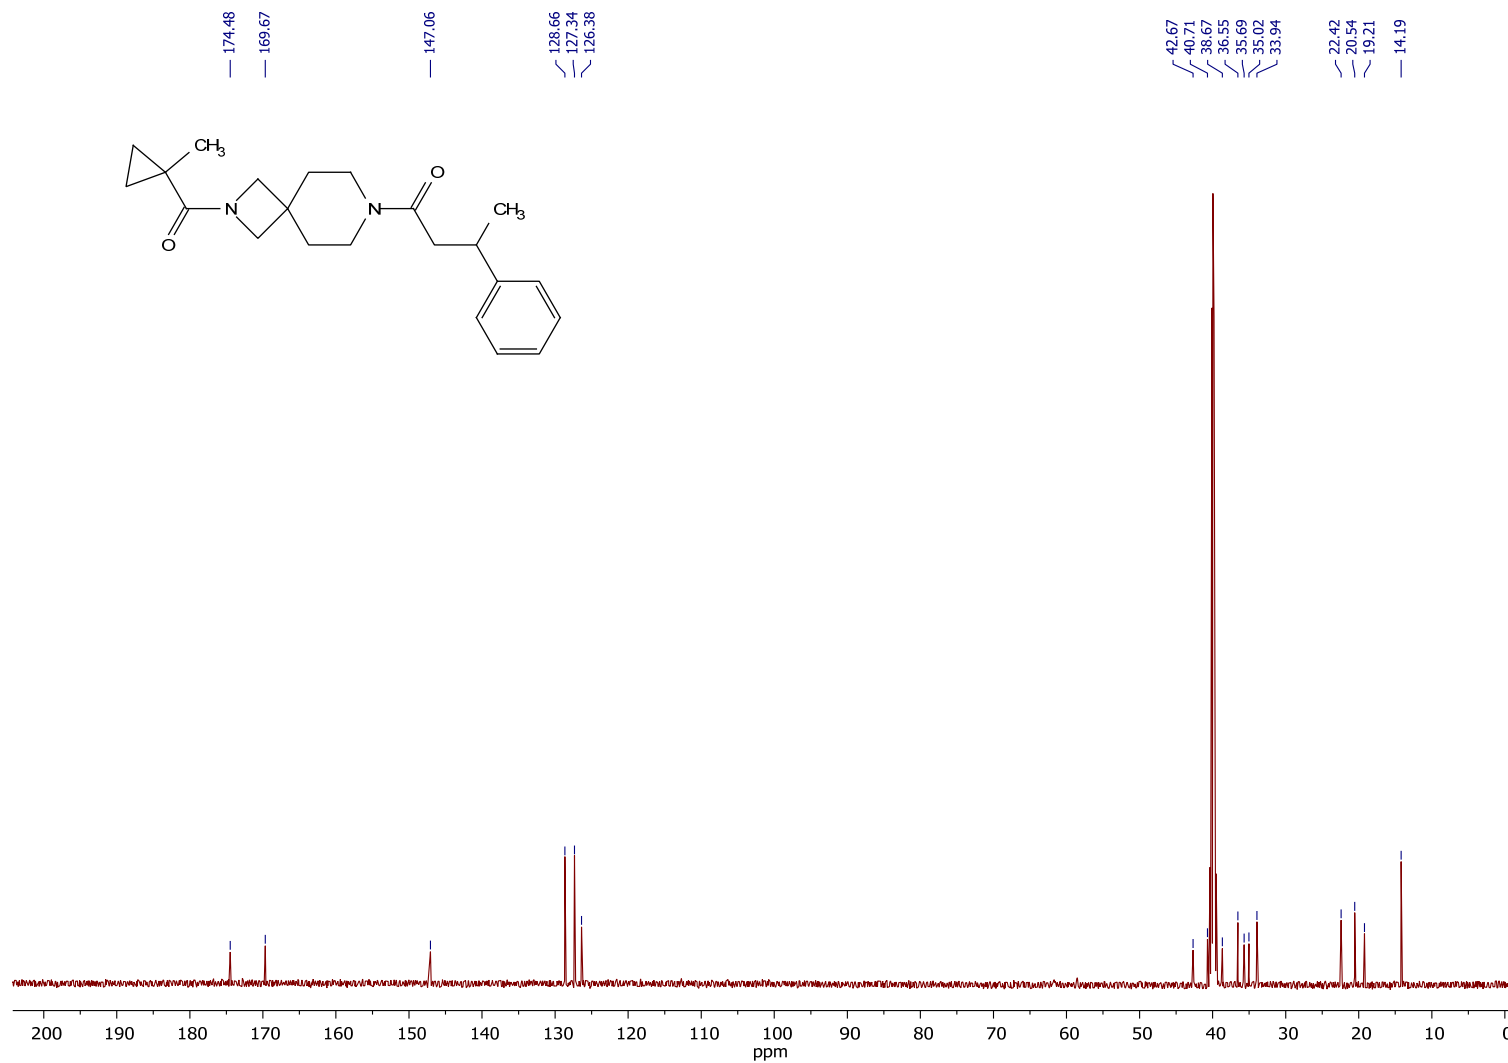

1-(2-(1-Methylcyclopropane-1-carbonyl)-2,7-diazaspiro[3.5]nonan-7-yl)-3-phenylbutan-1-one (**11**{60,102,51}), <sup>13</sup>C NMR (151 MHz, DMSO-*d*<sub>6</sub>)

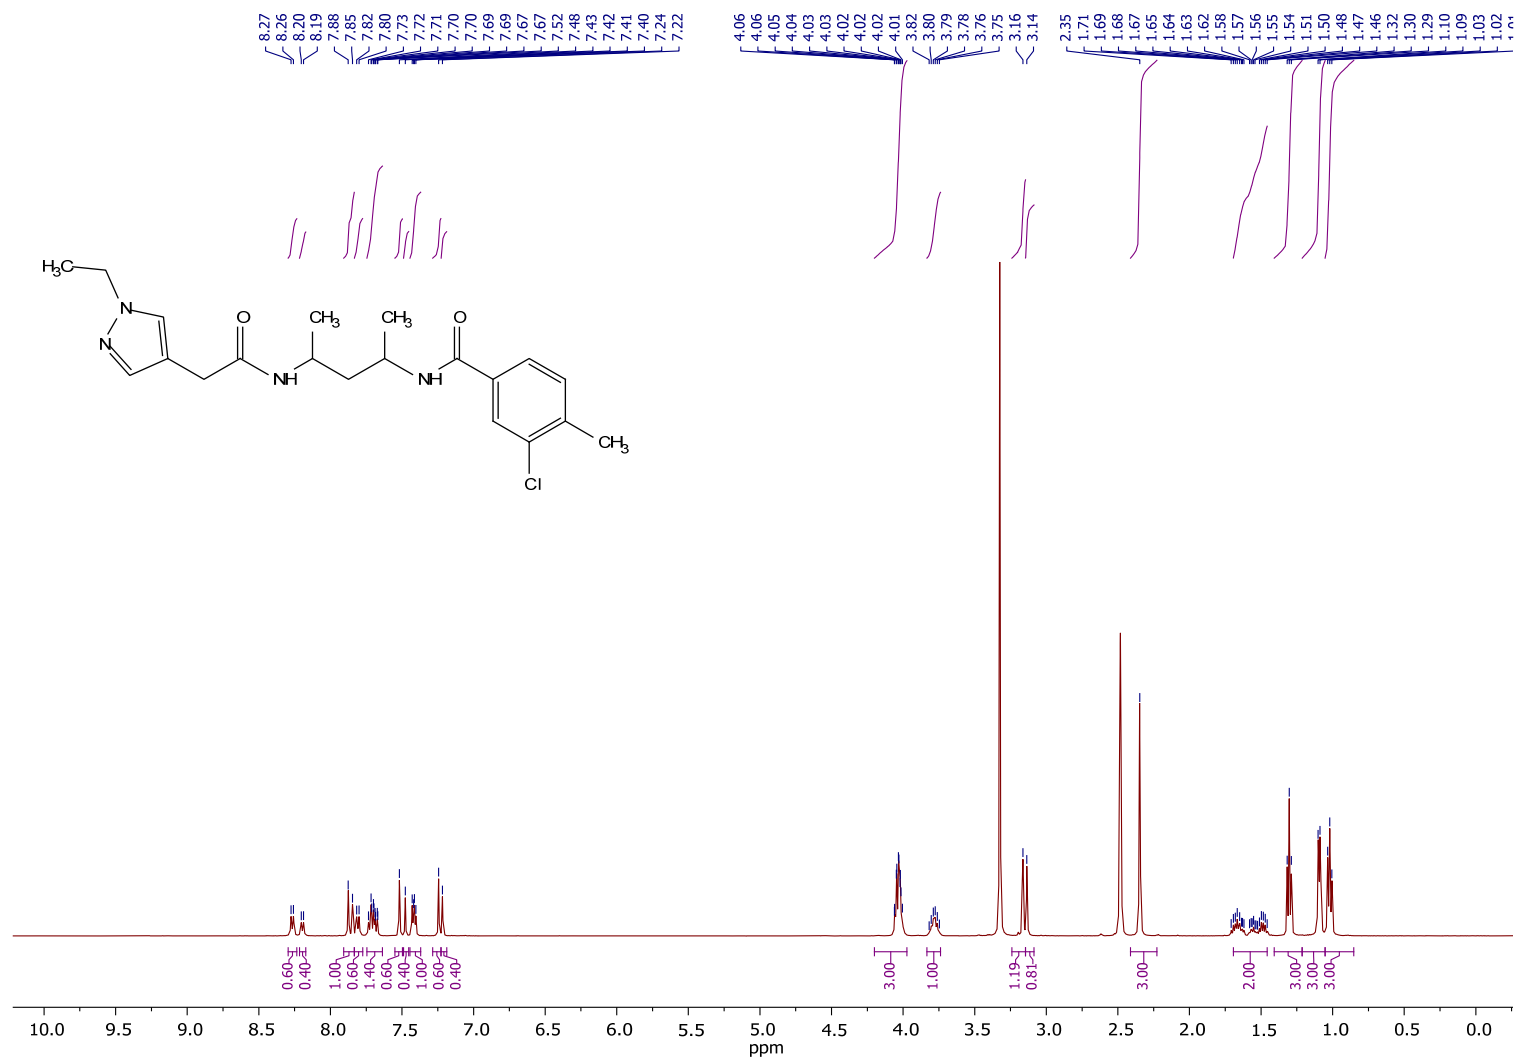

3-Chloro-*N*-(4-(2-(1-ethyl-1*H*-pyrazol-4-yl)acetamido)pentan-2-yl)-4-methylbenzamide (**11**{70,84,38}), <sup>1</sup>H NMR (500 MHz, DMSO-*d*<sub>6</sub>)

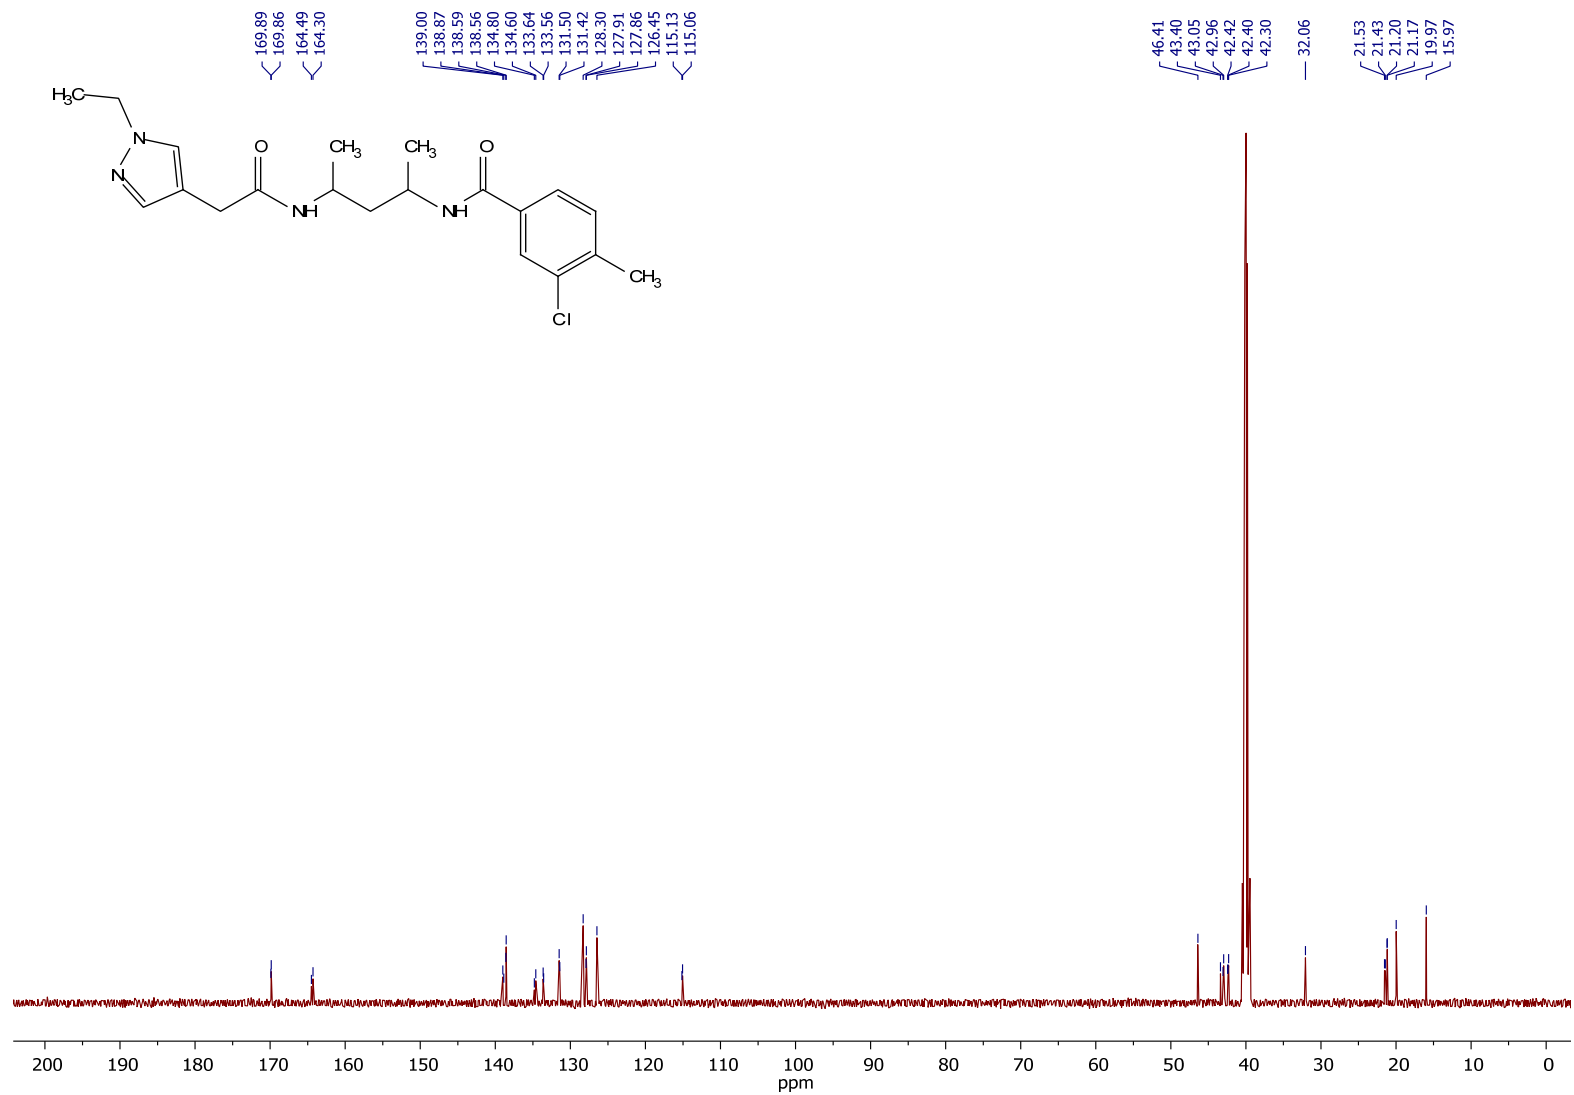

3-Chloro-*N*-(4-(2-(1-ethyl-1*H*-pyrazol-4-yl)acetamido)pentan-2-yl)-4-methylbenzamide (**11** {70,84,38}), <sup>13</sup>C NMR (126 MHz, DMSO-*d*<sub>6</sub>)

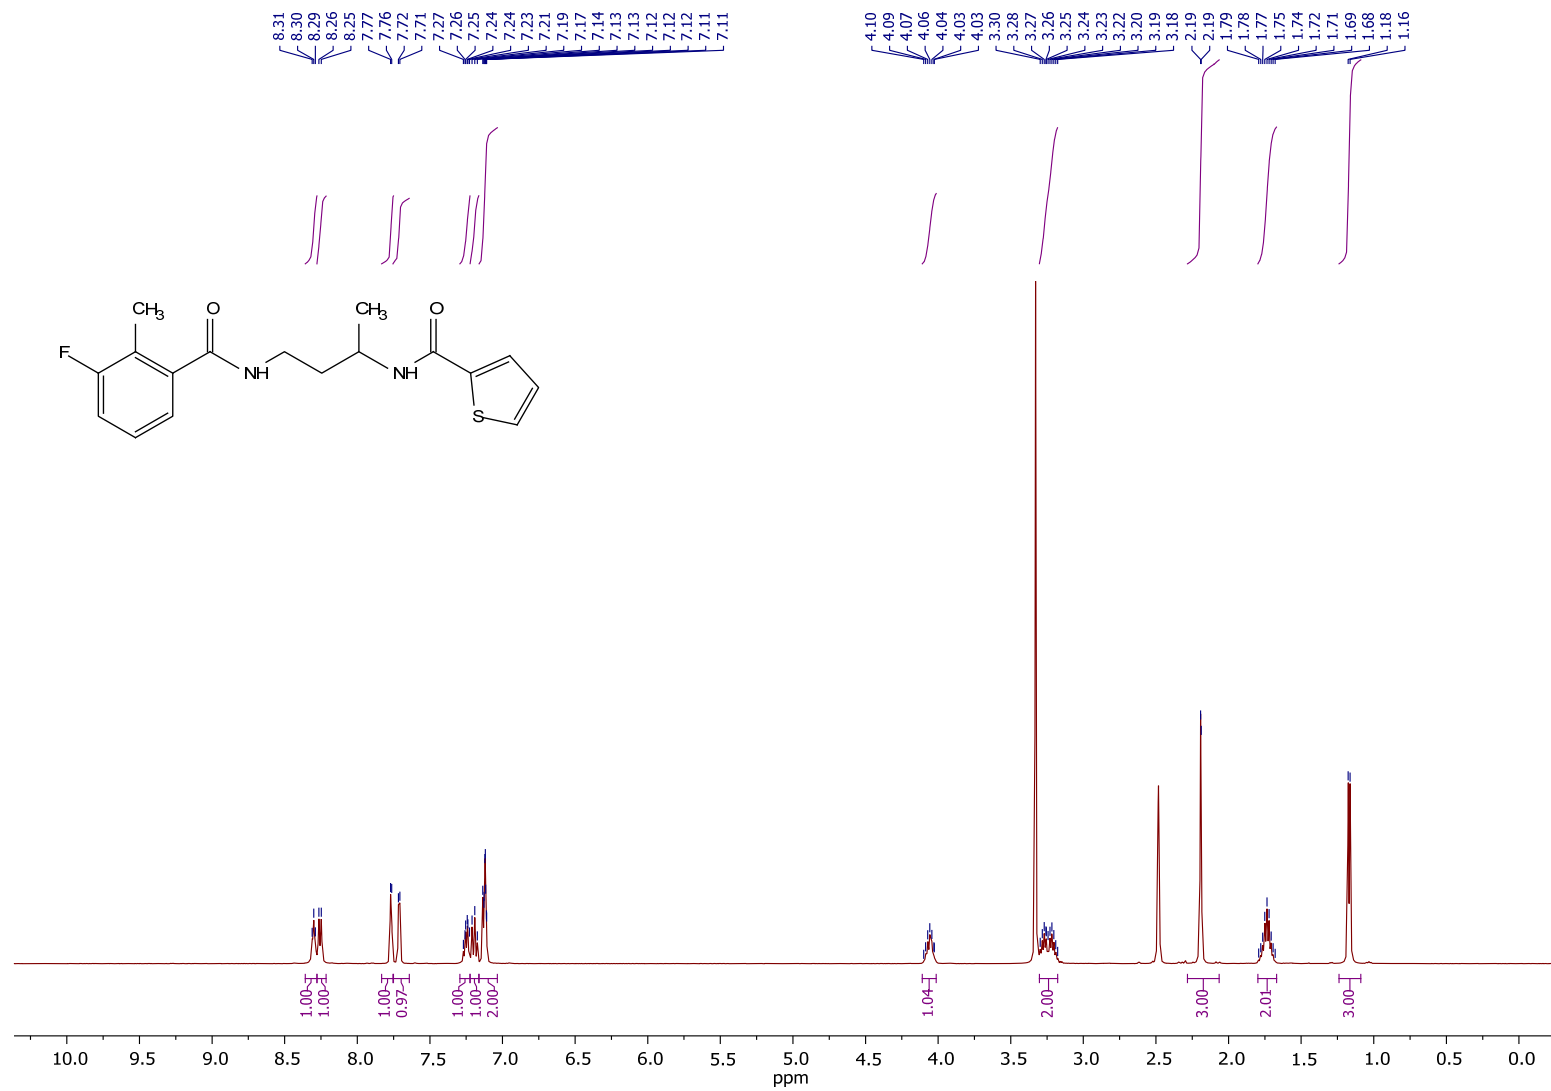

*N*-(4-(3-Fluoro-2-methylbenzamido)butan-2-yl)thiophene-2-carboxamide (**11**{83,105,54}), <sup>1</sup>H NMR (500 MHz, DMSO-*d*<sub>6</sub>)



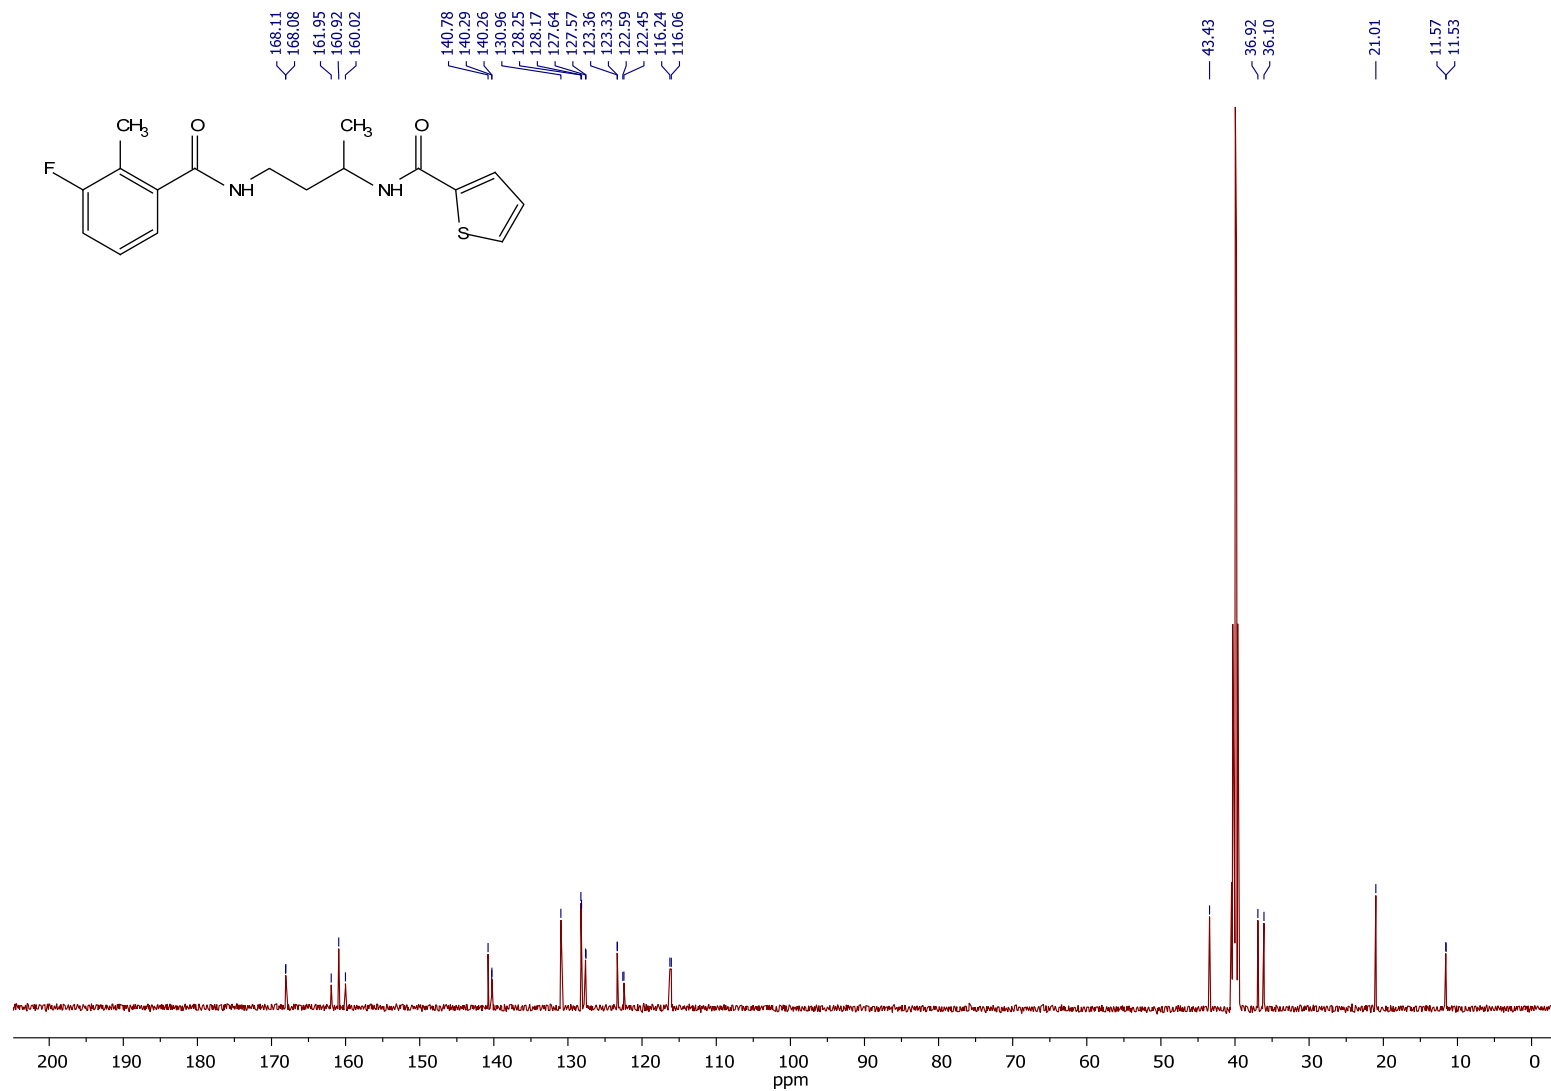

*N*-(4-(3-Fluoro-2-methylbenzamido)butan-2-yl)thiophene-2-carboxamide (11{83,105,54}), <sup>13</sup>C NMR (126 MHz, DMSO-*d*<sub>6</sub>)

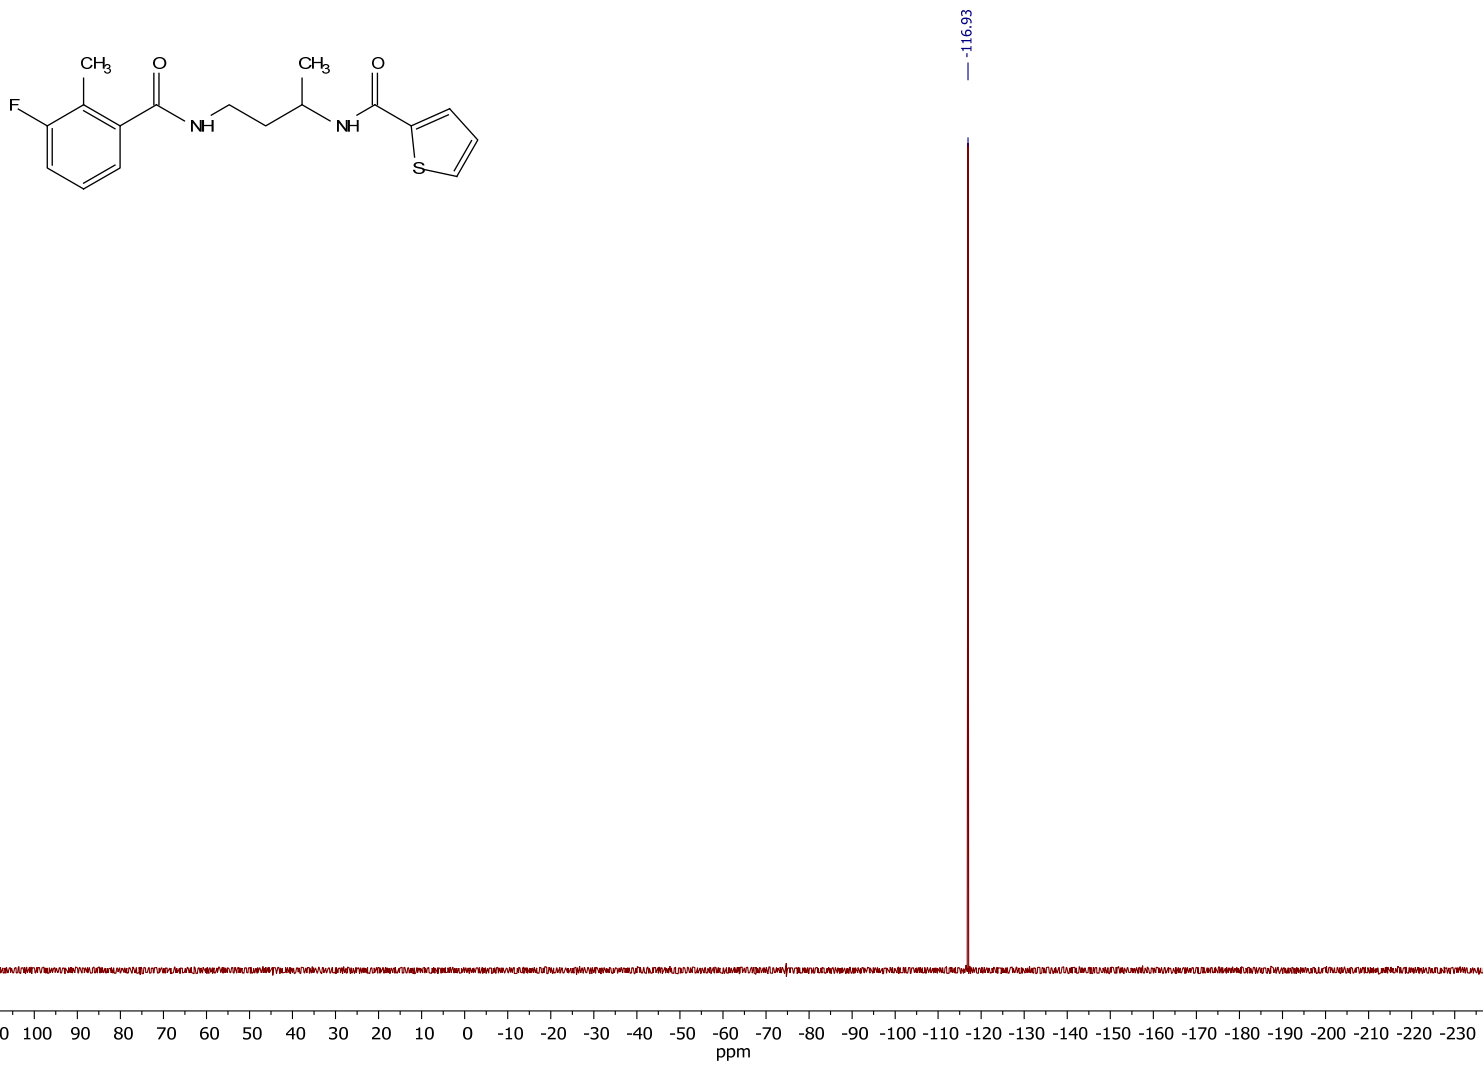

*N*-(4-(3-Fluoro-2-methylbenzamido)butan-2-yl)thiophene-2-carboxamide (**11**{83,105,54}),  $^{19}\text{F}$  NMR (376 MHz,  $\text{DMSO-}d_6$ )

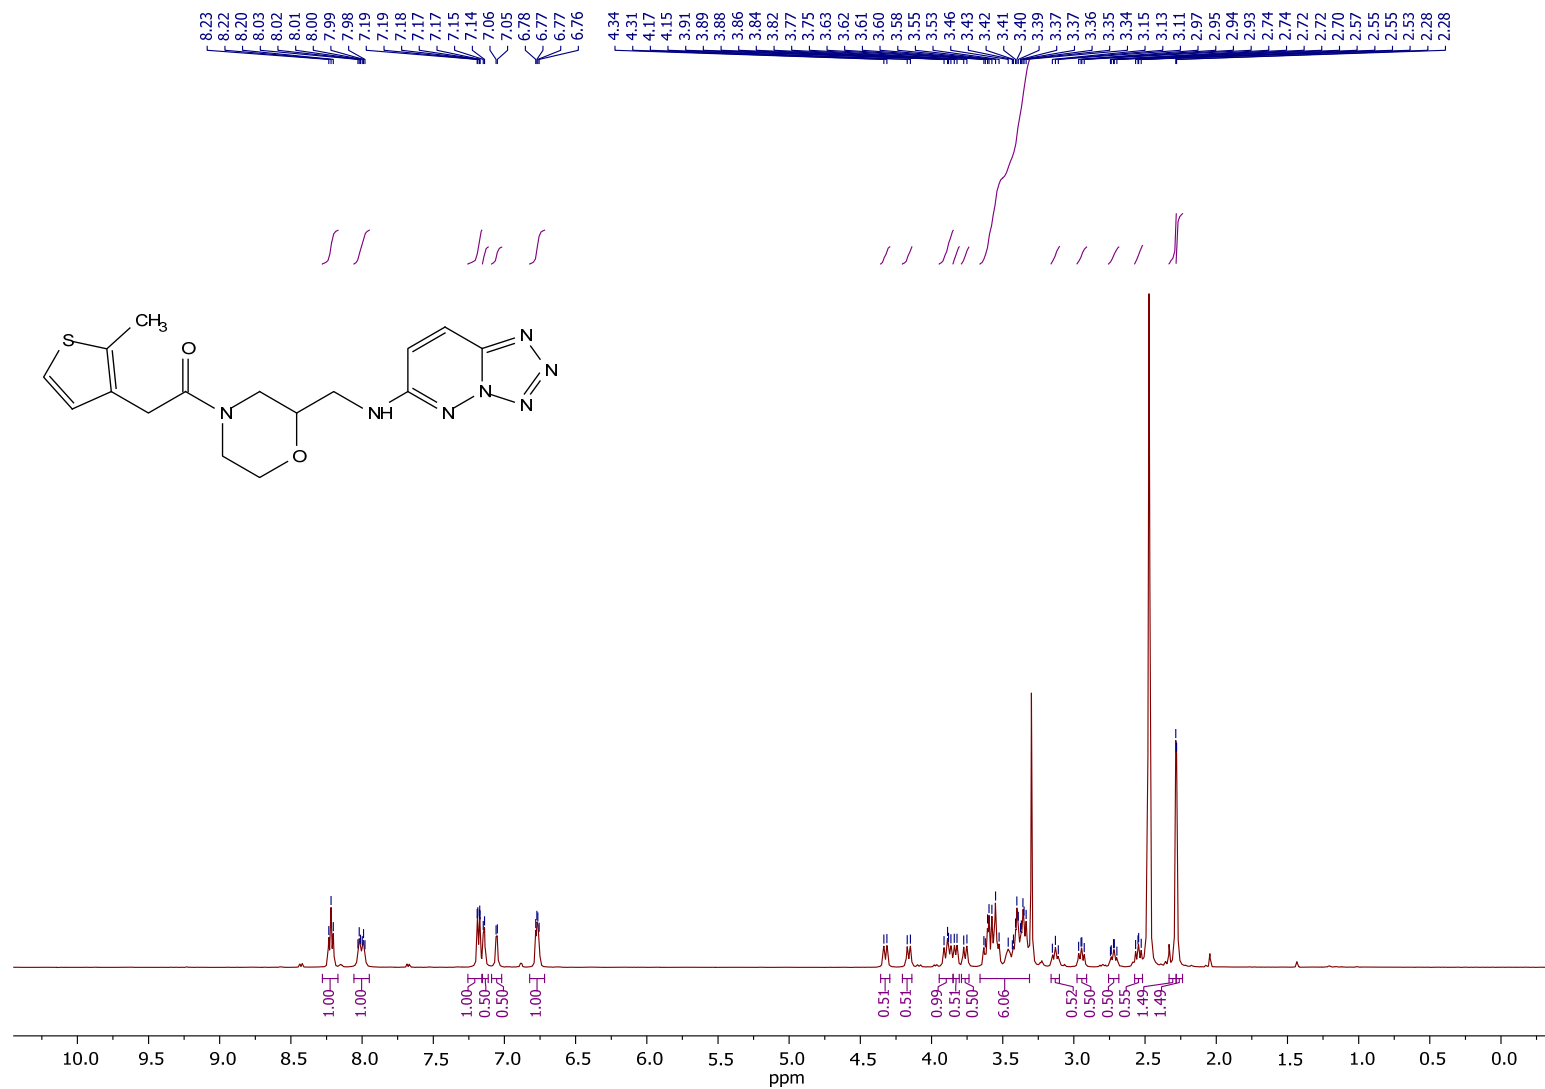

2-(2-Methylthiophen-3-yl)-1-(2-((tetrazolo[1,5-*b*]pyridazin-6-ylamino)methyl)morpholino)ethanone (**12** {140,239,35}),  
<sup>1</sup>H NMR (600 MHz, DMSO-*d*<sub>6</sub>)

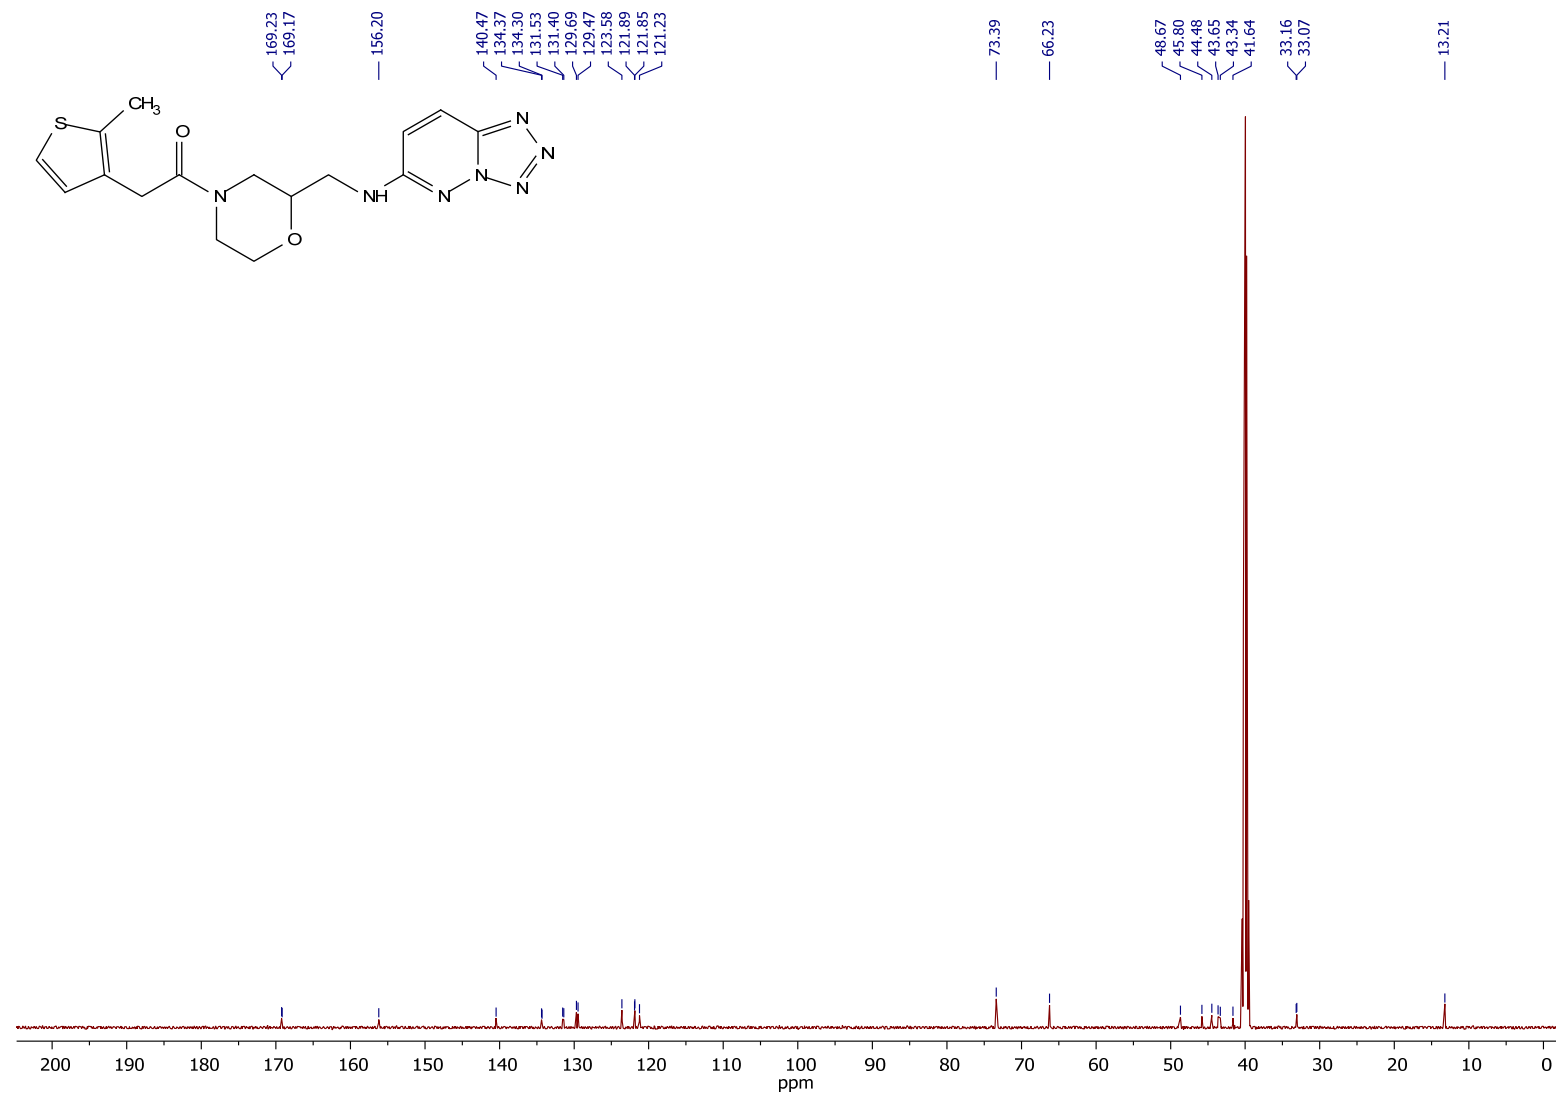

2-(2-Methylthiophen-3-yl)-1-(2-((tetrazolo[1,5-*b*]pyridazin-6-ylamino)methyl)morpholino)ethanone (**12**{140,239,35}),  $^{13}\text{C}$  NMR (151 MHz, DMSO- $d_6$ )

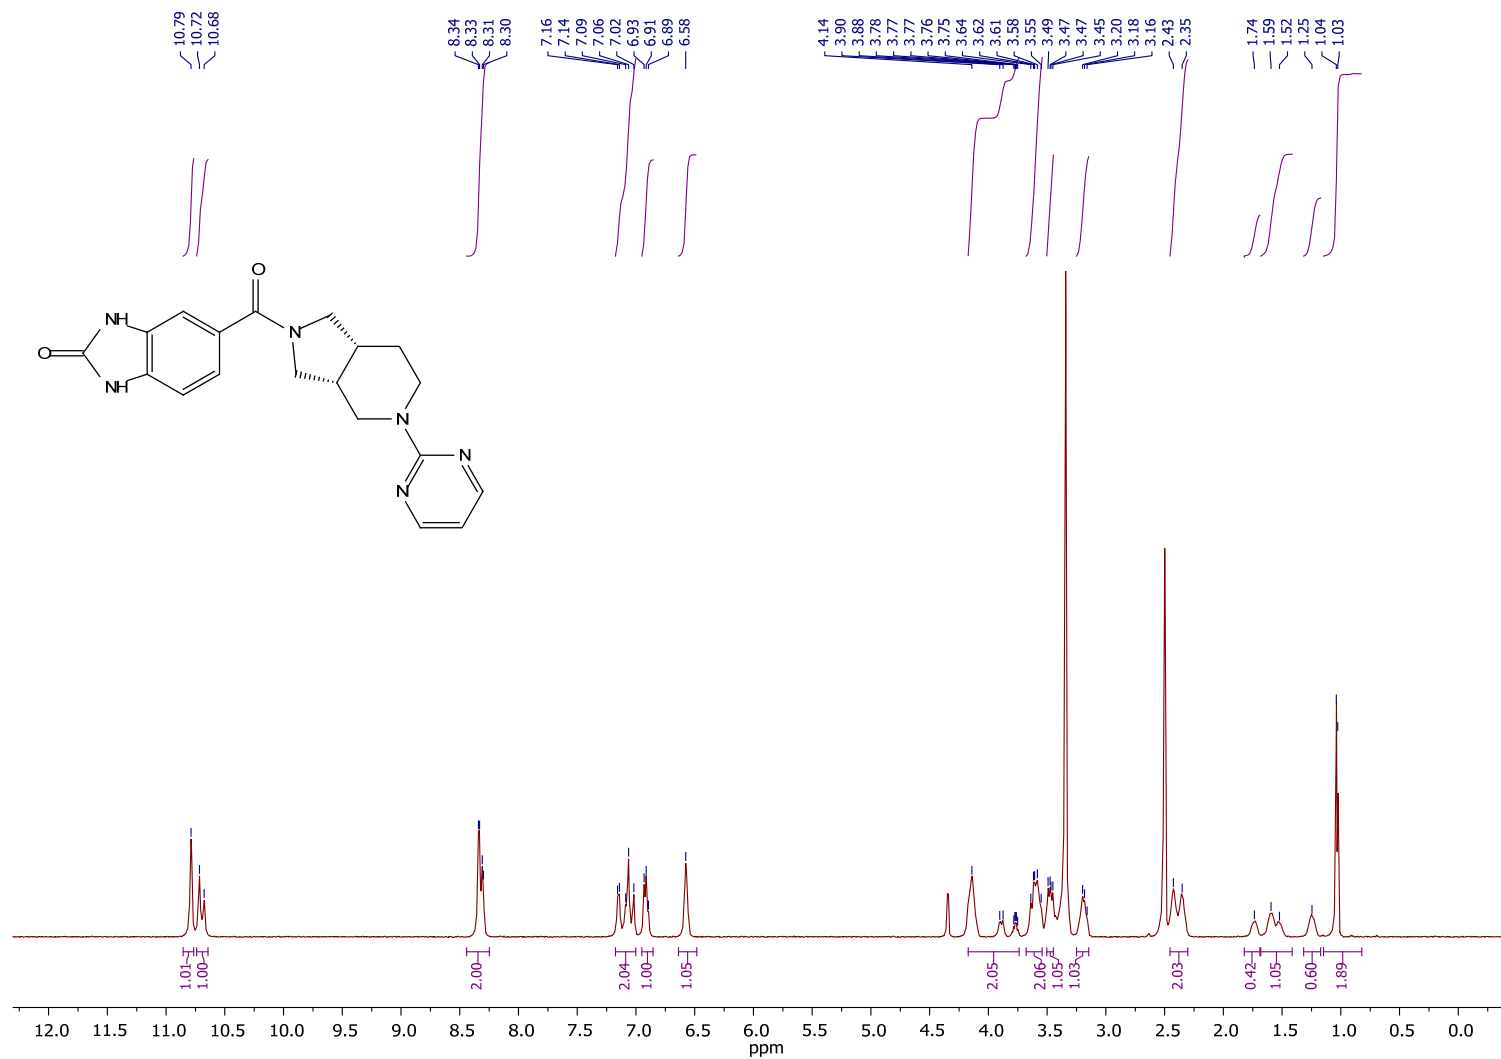

*rac*-5-((3a*R*,7a*R*)-5-(Pyrimidin-2-yl)octahydro-1*H*-pyrrolo[3,4-*c*]pyridine-2-carbonyl)-1*H*-benzo[*d*]imidazol-2(3*H*)-one (**12{17,14,5}**),  
<sup>1</sup>H NMR (500 MHz, DMSO-*d*<sub>6</sub>)

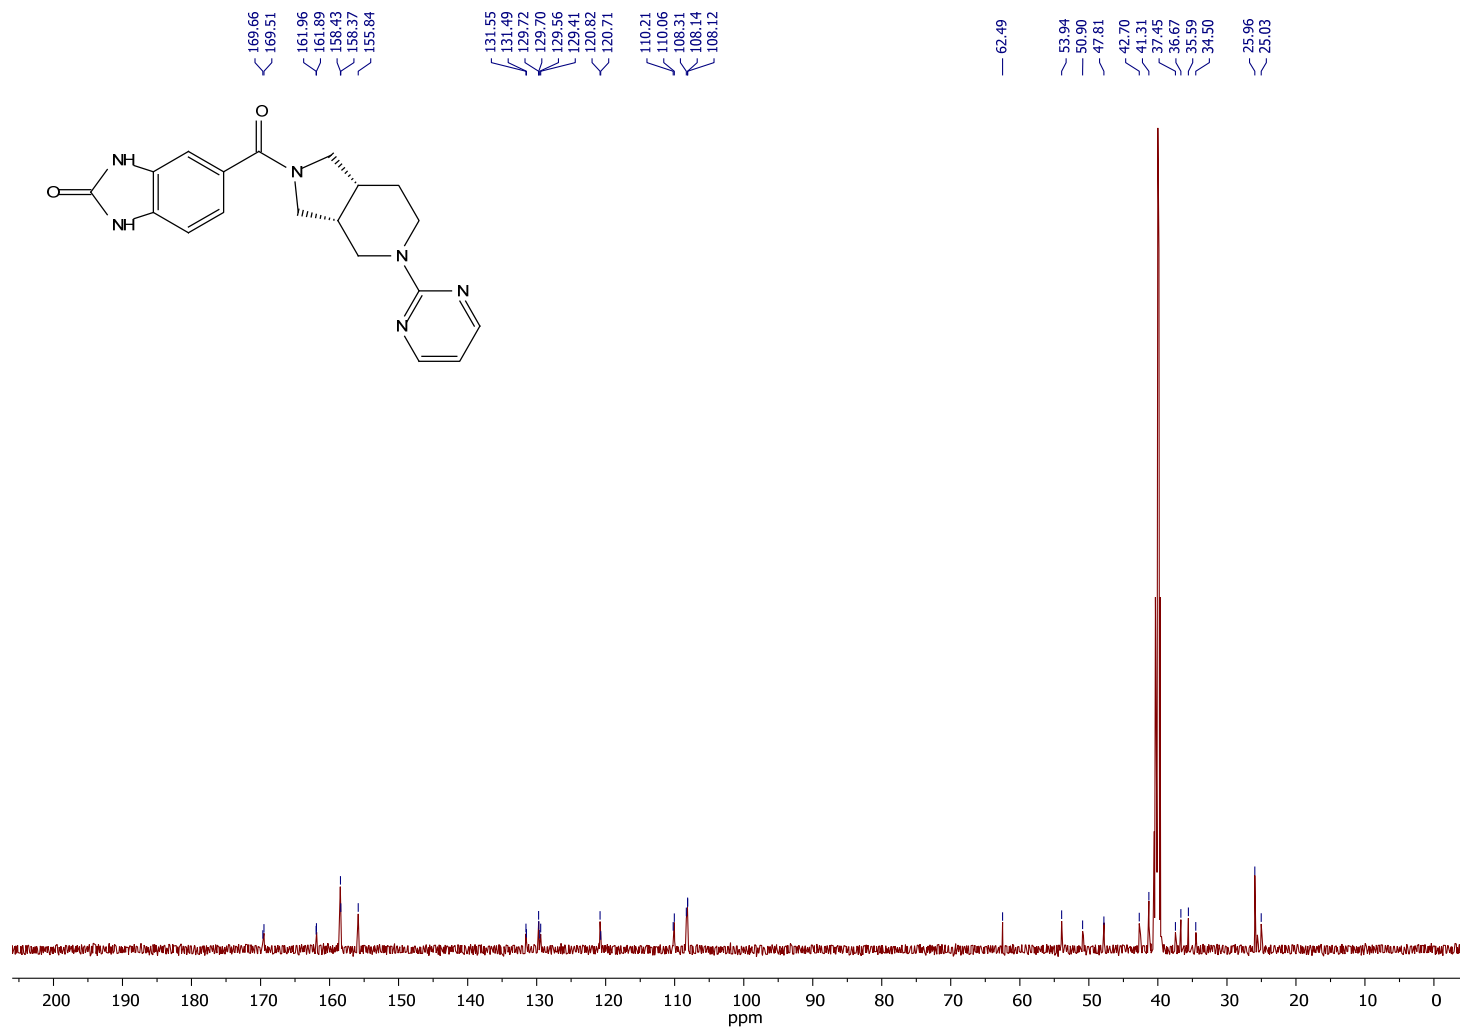

*rac*-5-((3a*R*,7a*R*)-5-(Pyrimidin-2-yl)octahydro-1*H*-pyrrolo[3,4-*c*]pyridine-2-carbonyl)-1*H*-benzo[*d*]imidazol-2(3*H*)-one (**12**{17,14,5}),  
<sup>13</sup>C NMR (126 MHz, DMSO-*d*<sub>6</sub>)

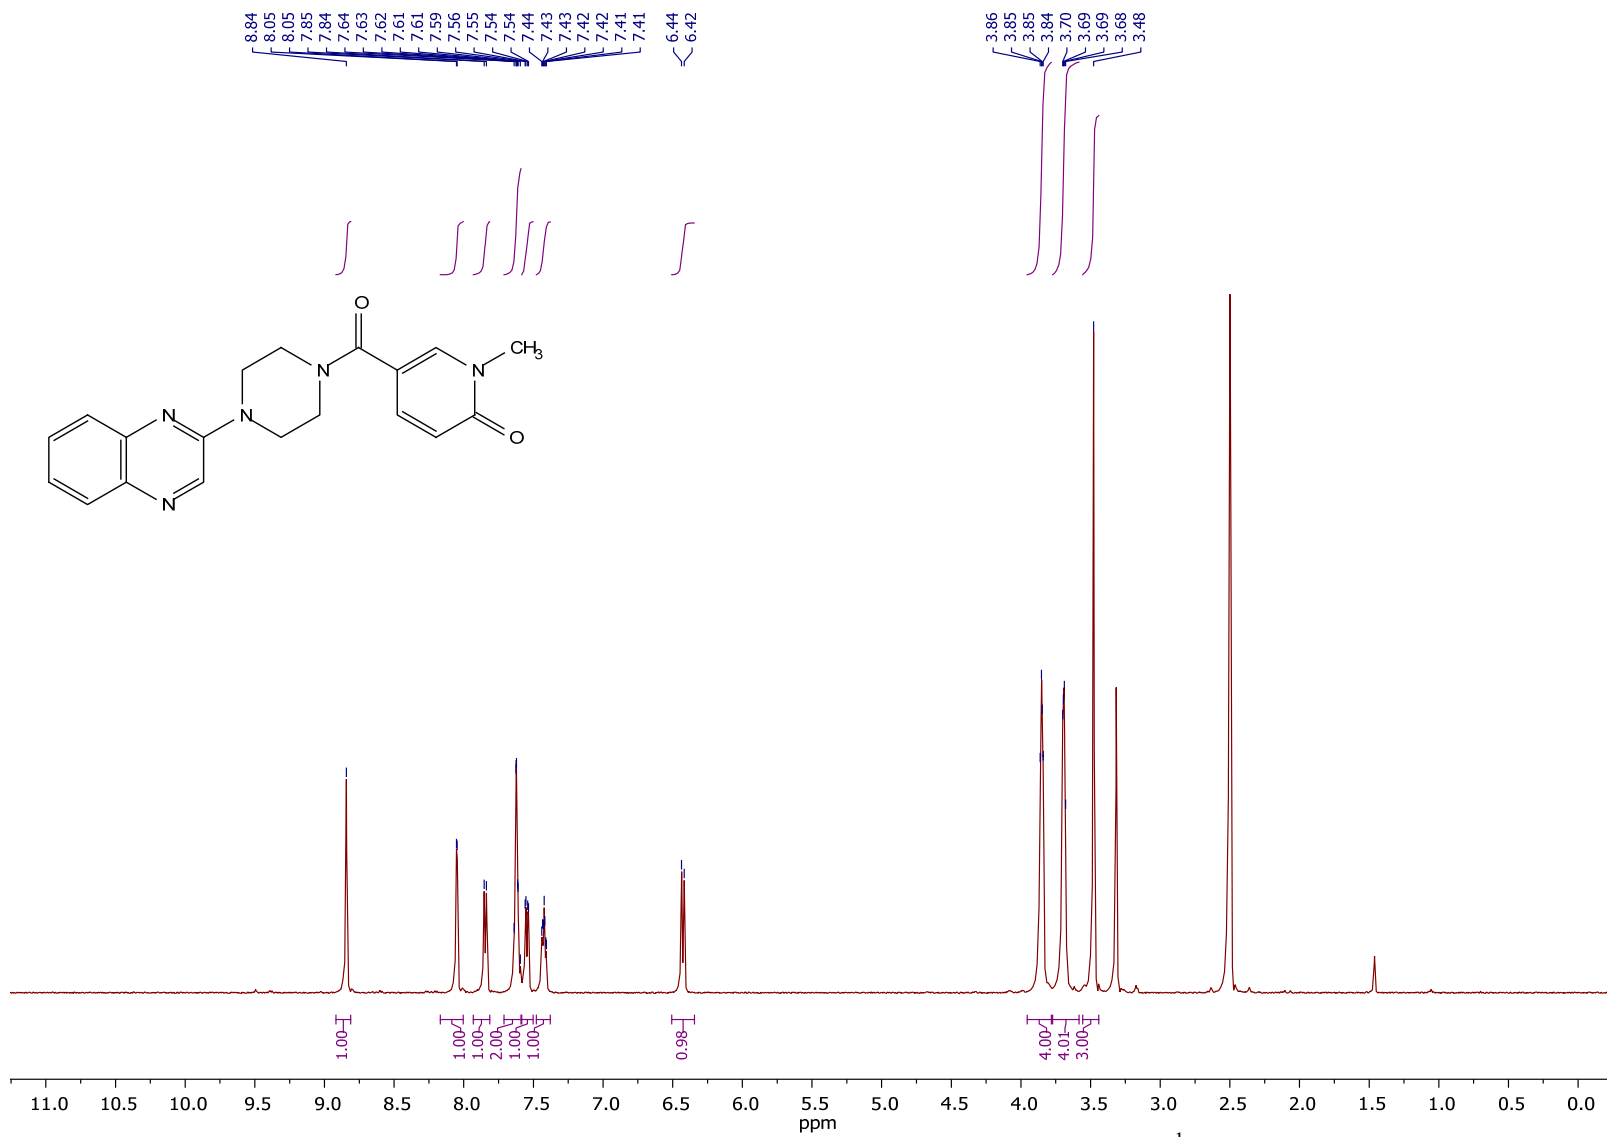

1-Methyl-5-(4-(quinoxalin-2-yl)piperazine-1-carbonyl)pyridin-2(1H)-one (**12**{9,26,3}), <sup>1</sup>H NMR (500 MHz, DMSO-*d*<sub>6</sub>)

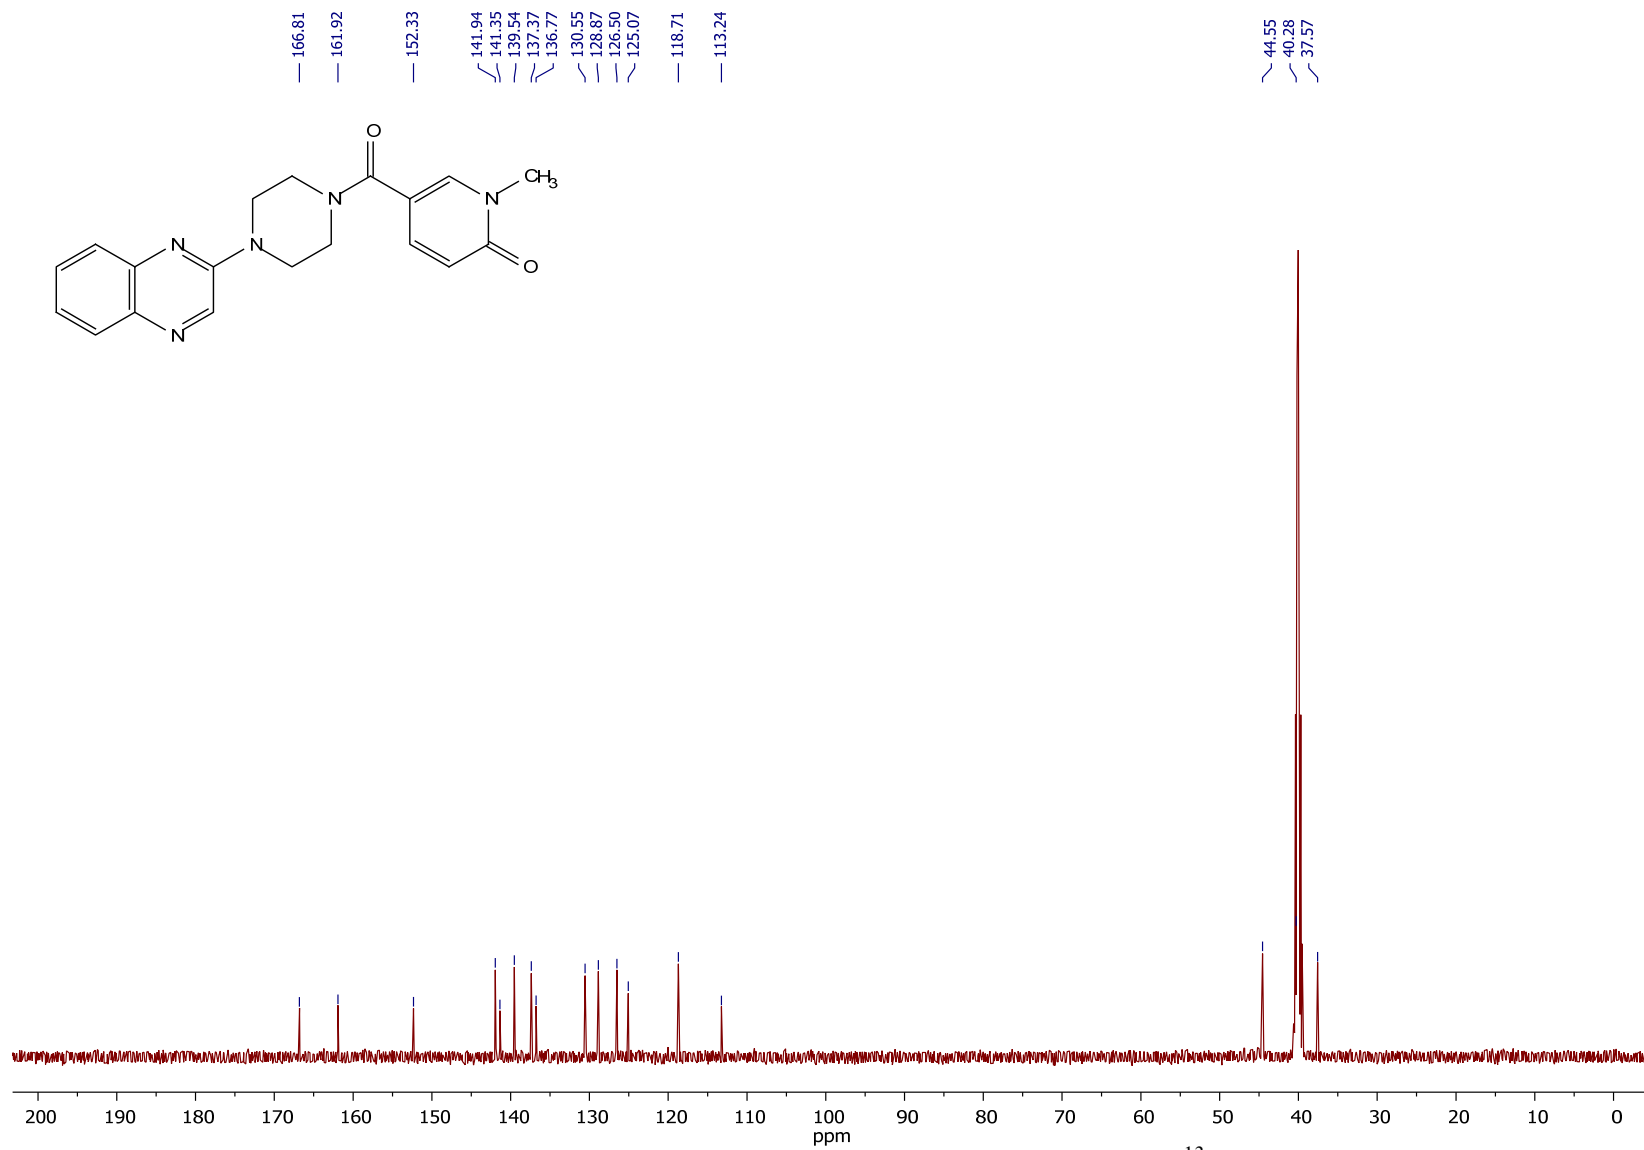

1-Methyl-5-(4-(quinoxalin-2-yl)piperazine-1-carbonyl)pyridin-2(1H)-one (**12**{9,26,3}),  $^{13}\text{C}$  NMR (126 MHz, DMSO- $d_6$ )



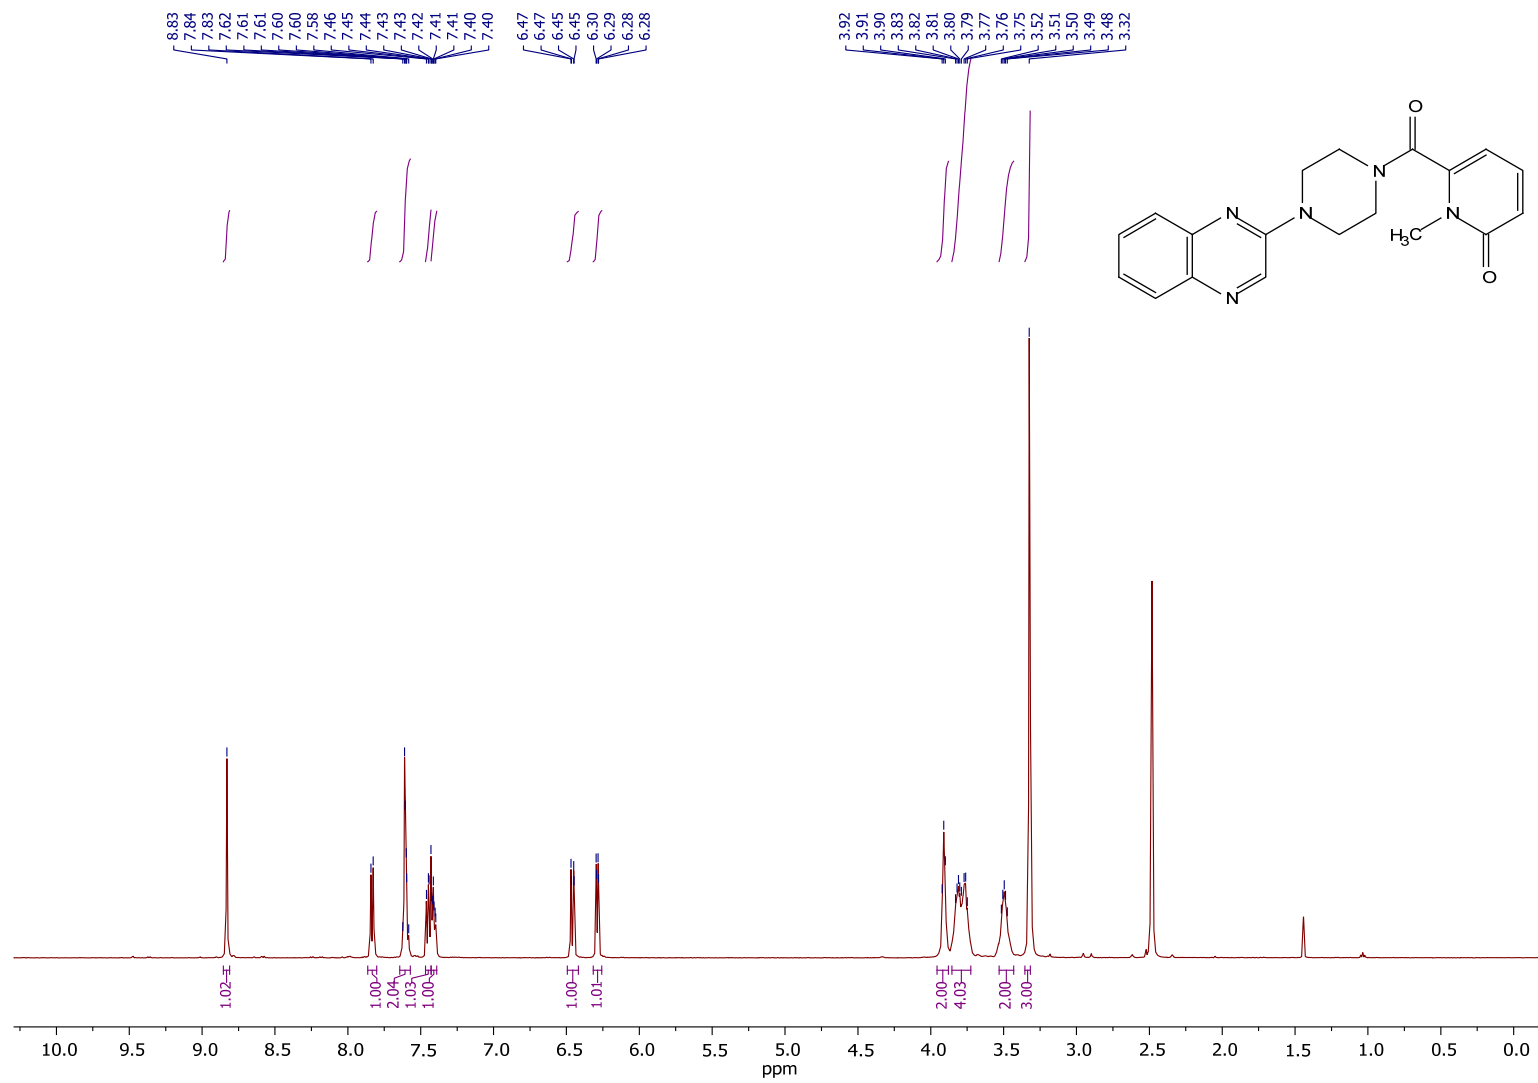

1-Methyl-6-(4-(quinoxalin-2-yl)piperazine-1-carbonyl)pyridin-2(1H)-one (**12**{9,27,3}), <sup>1</sup>H NMR (500 MHz, DMSO-*d*<sub>6</sub>)

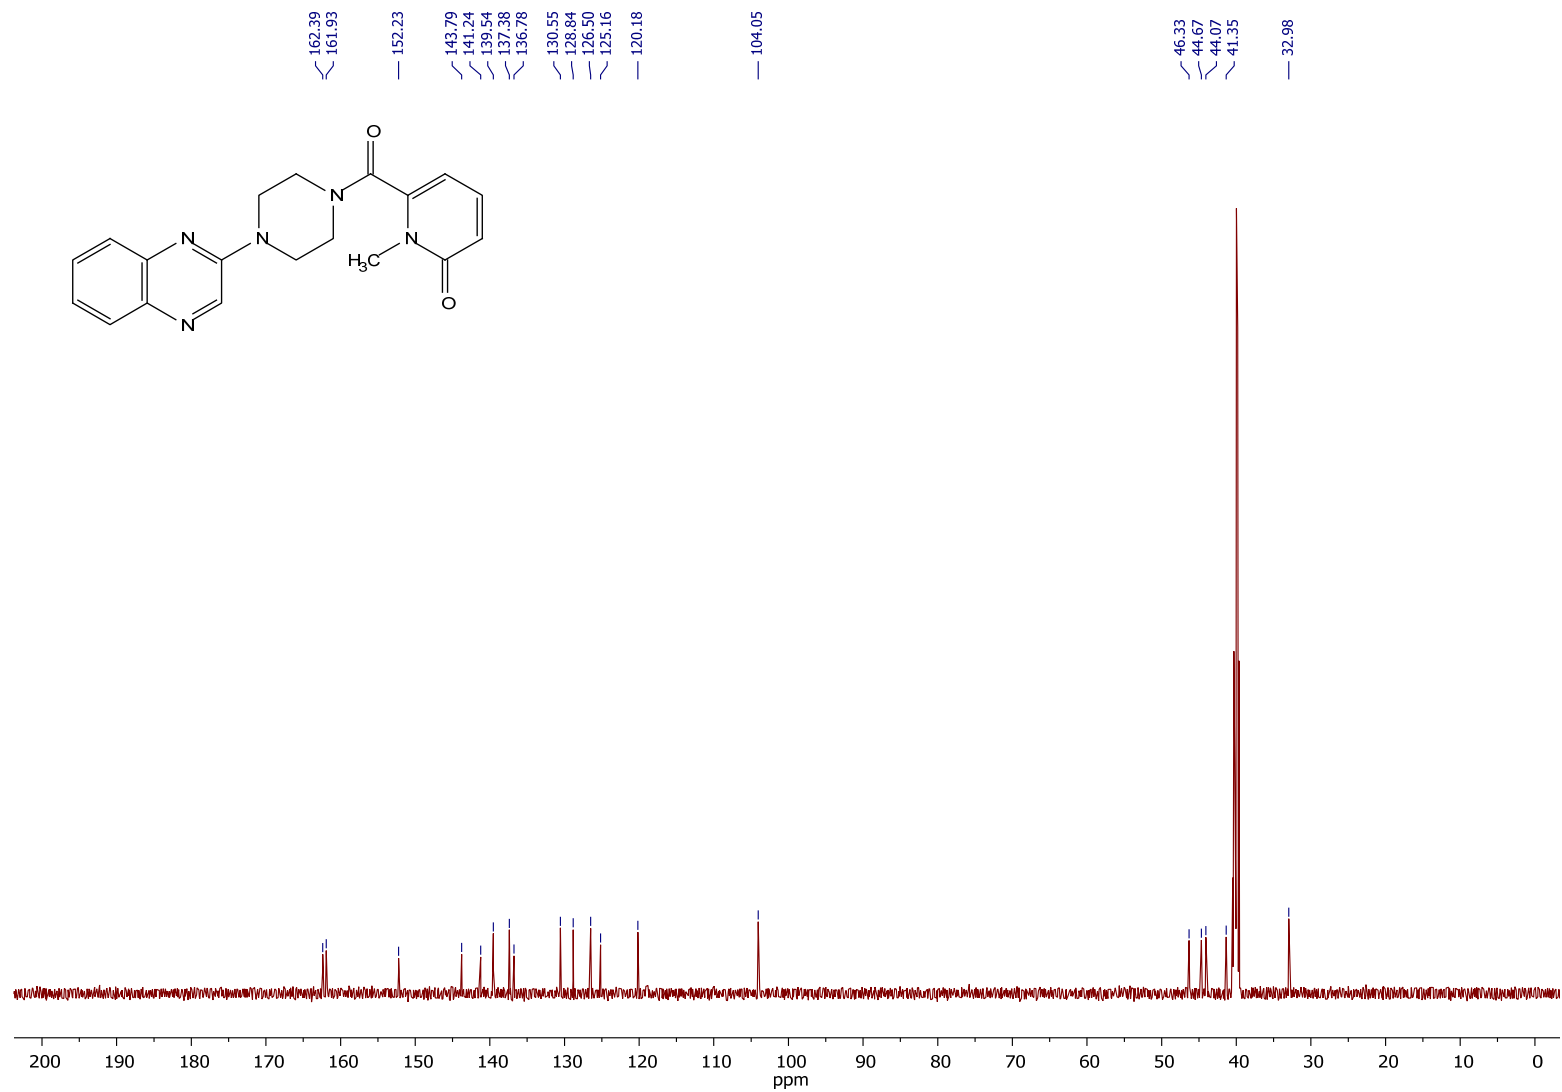

1-Methyl-6-(4-(quinoxalin-2-yl)piperazine-1-carbonyl)pyridin-2(1H)-one (**12**{9,27,3}),  $^{13}\text{C}$  NMR (126 MHz, DMSO- $d_6$ )

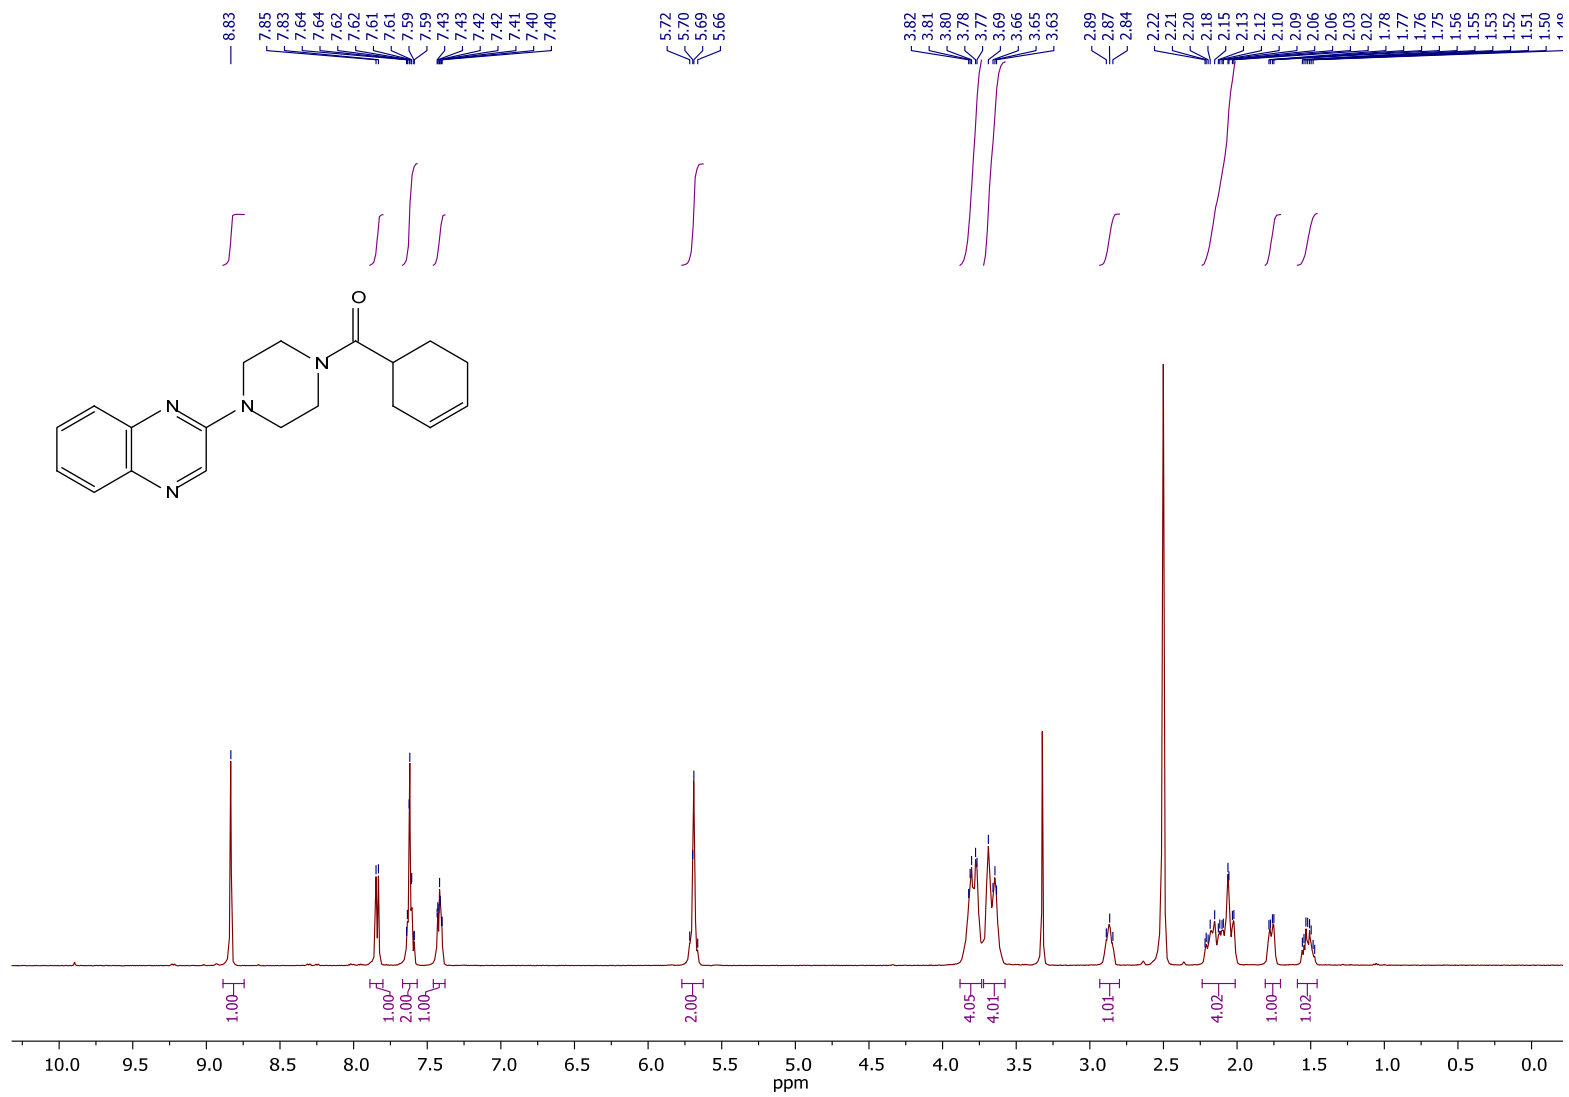

Cyclohex-3-en-1-yl(4-(quinoxalin-2-yl)piperazin-1-yl)methanone (**12**<sub>{9,28,3}</sub>), <sup>1</sup>H NMR (500 MHz, DMSO-d<sub>6</sub>)

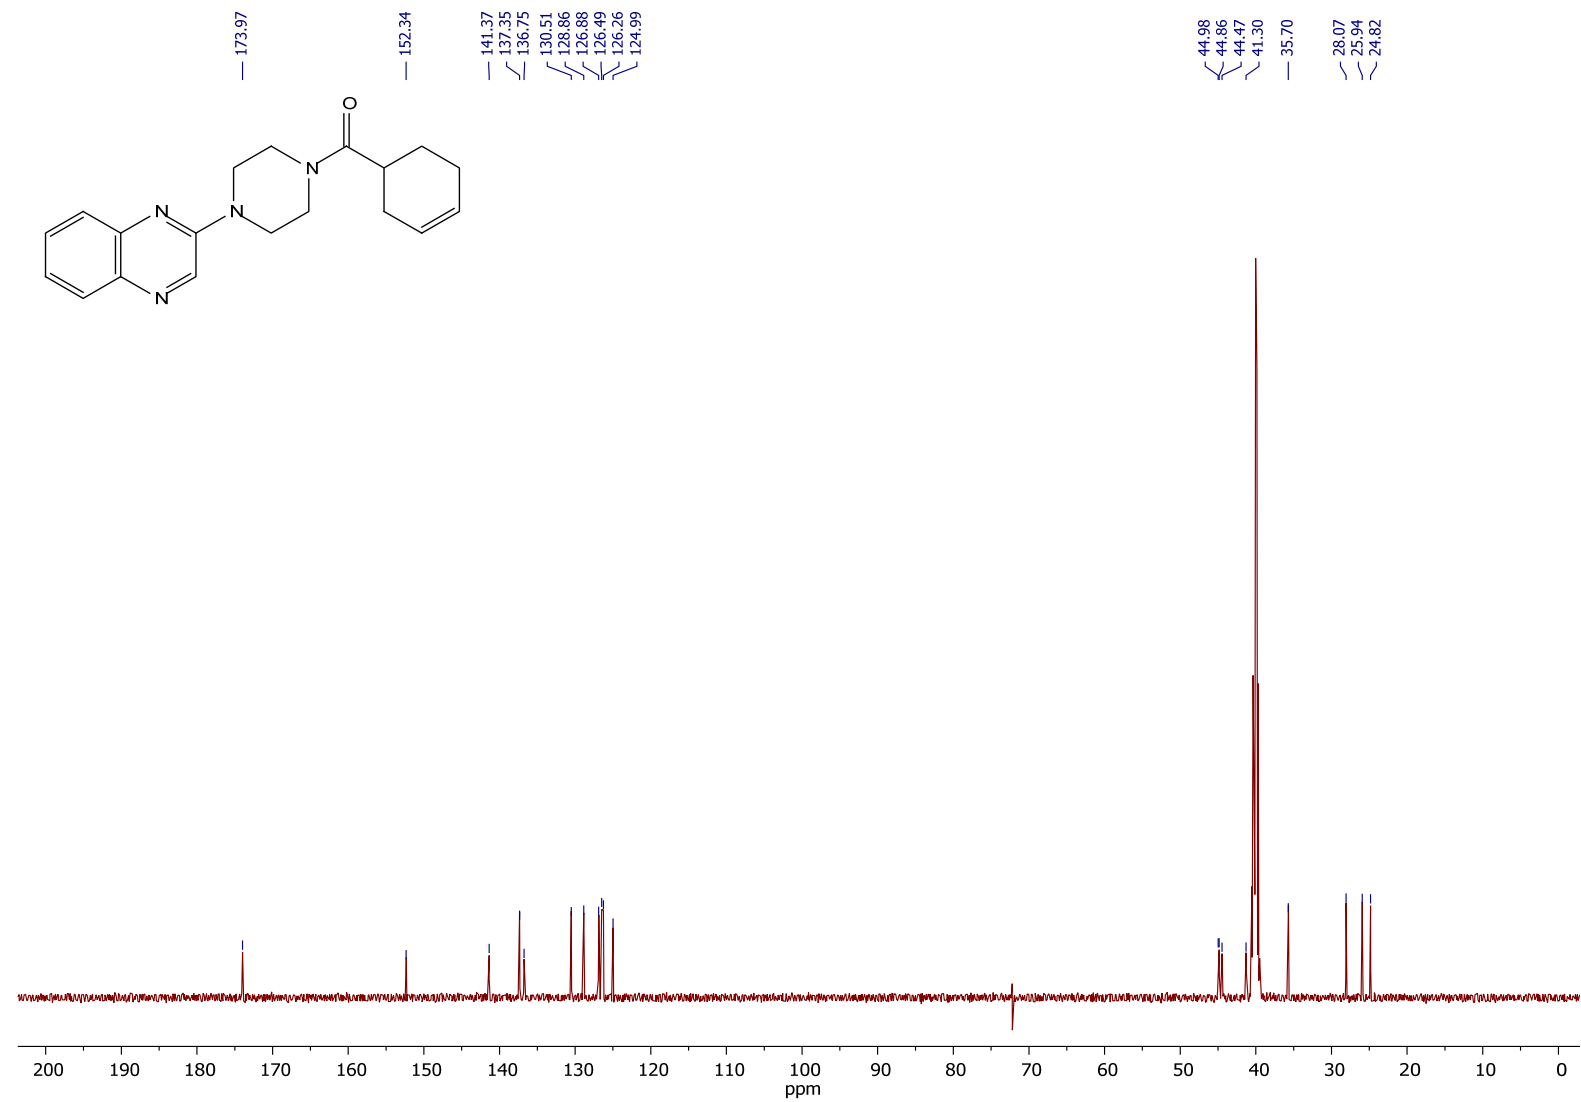

Cyclohex-3-en-1-yl(4-(quinoxalin-2-yl)piperazin-1-yl)methanone (**12**{9,28,3}), <sup>13</sup>C NMR (126 MHz, DMSO-*d*<sub>6</sub>)

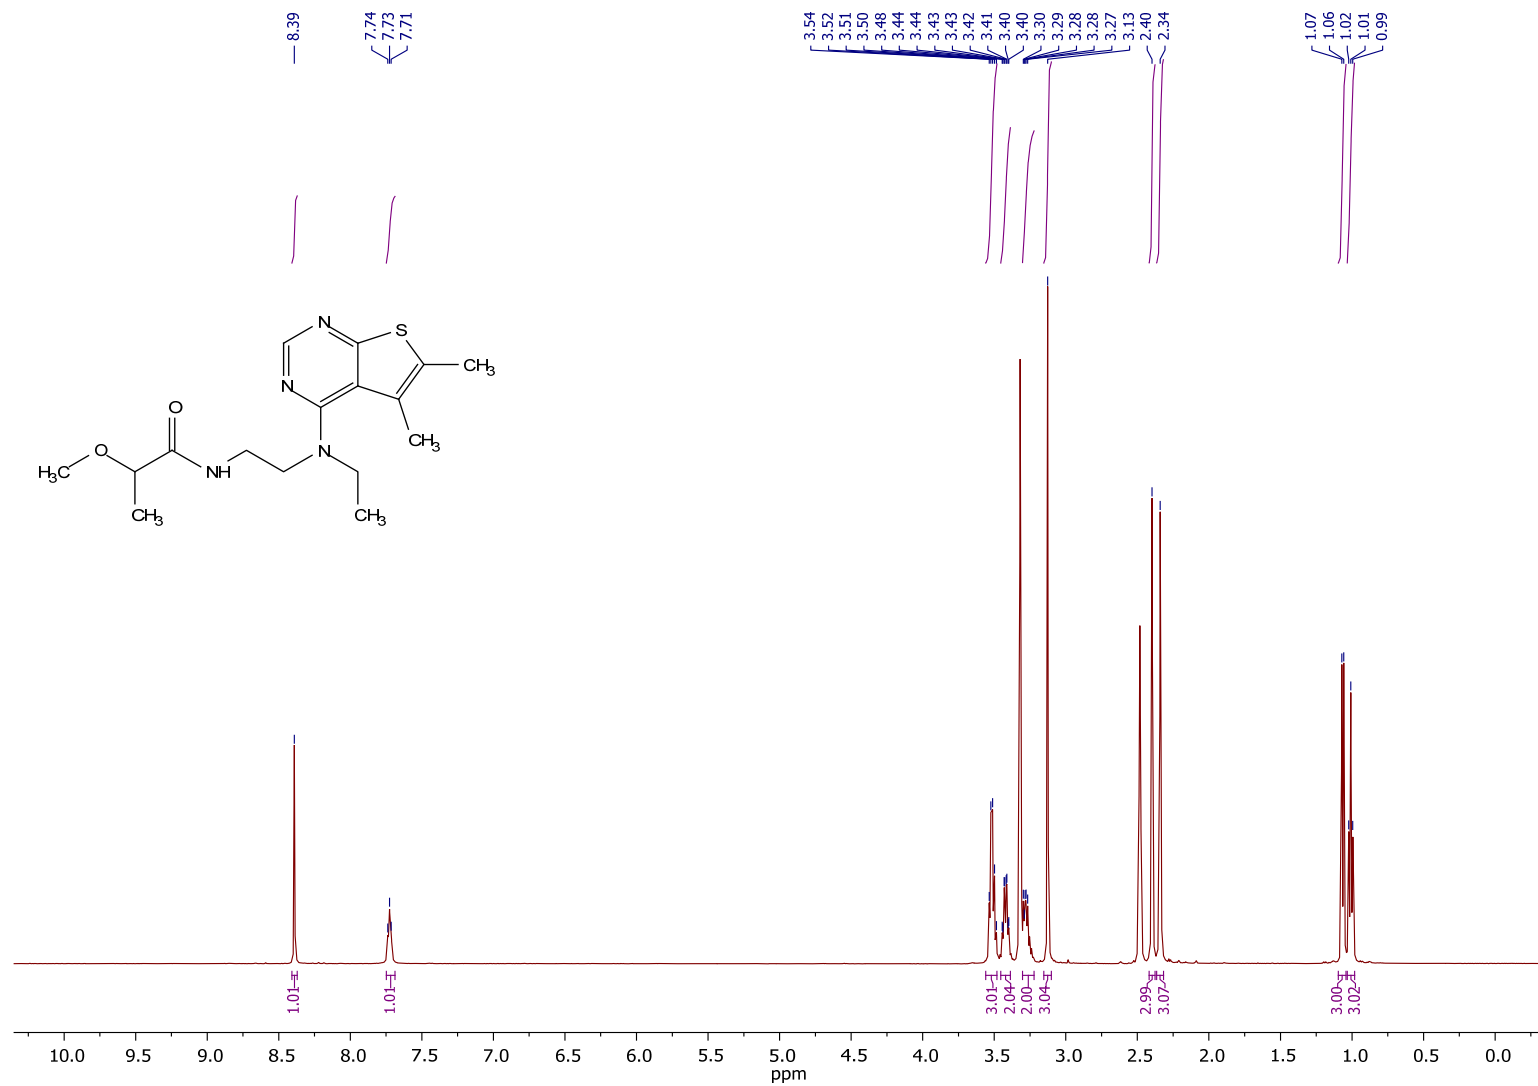

*N*-(2-((5,6-Dimethylthieno[2,3-*d*]pyrimidin-4-yl)(ethyl)amino)ethyl)-2-methoxypropanamide (**12**{45,44,24}), <sup>1</sup>H NMR (500 MHz, DMSO-*d*<sub>6</sub>)

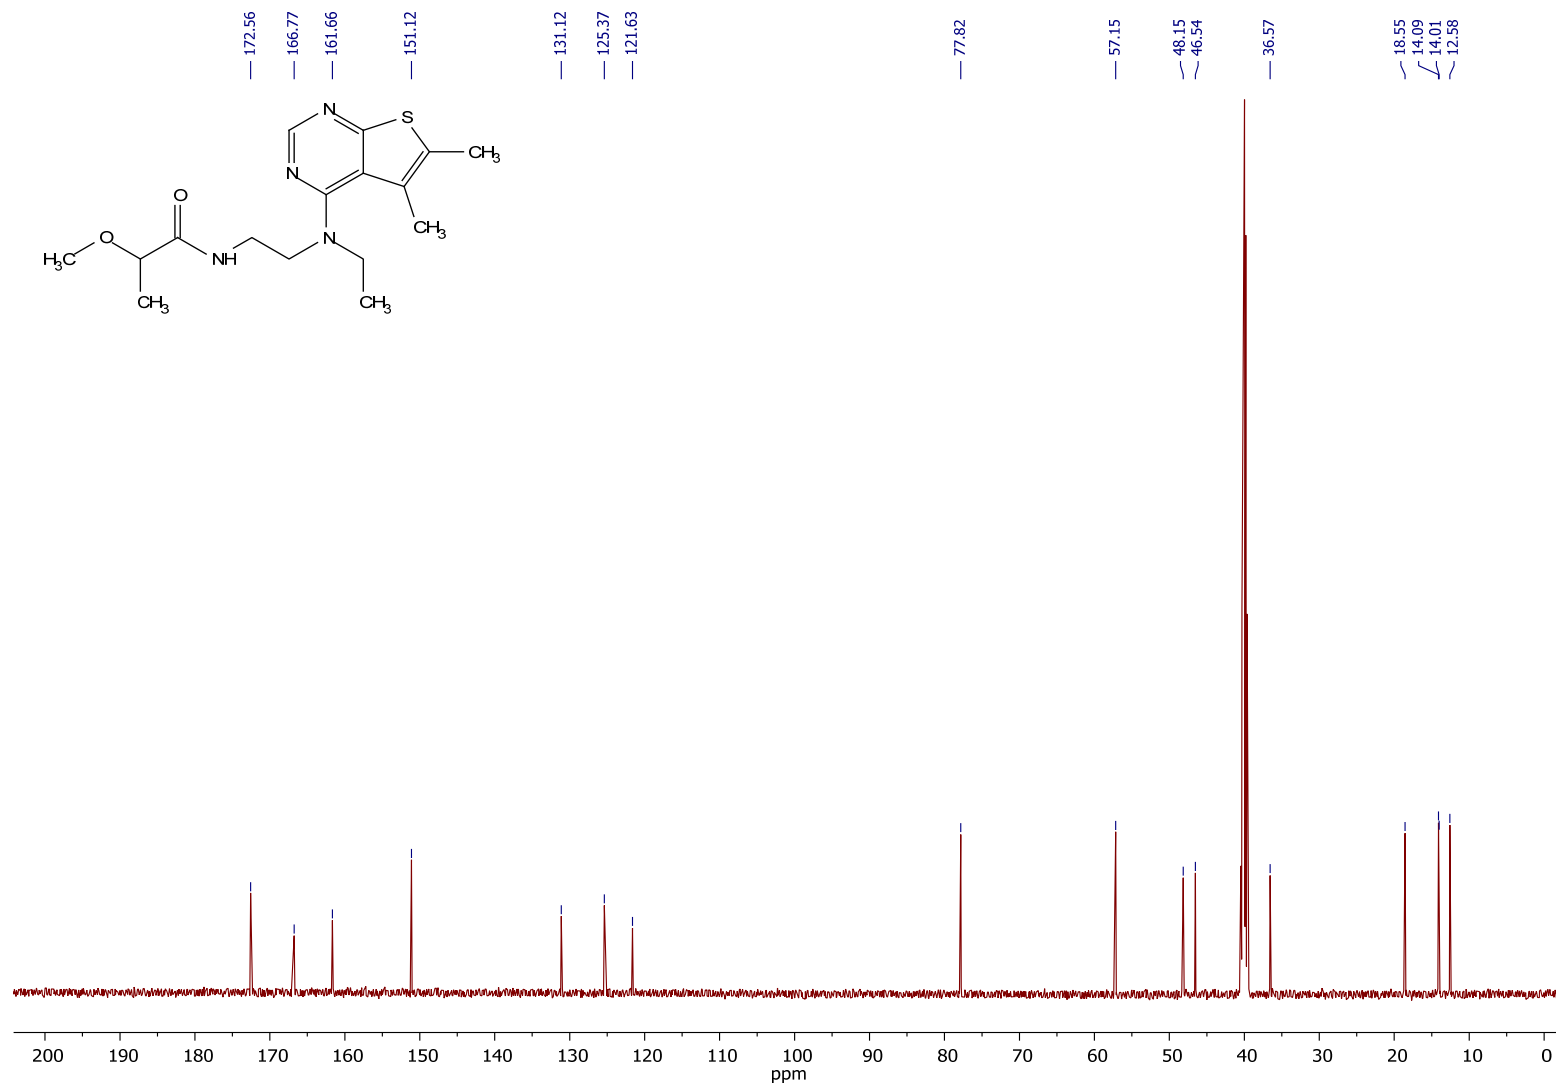

*N*-(2-((5,6-Dimethylthieno[2,3-*d*]pyrimidin-4-yl)(ethyl)amino)ethyl)-2-methoxypropanamide (**12**<sub>{45,44,24}</sub>), <sup>13</sup>C NMR (126 MHz, DMSO-*d*<sub>6</sub>)

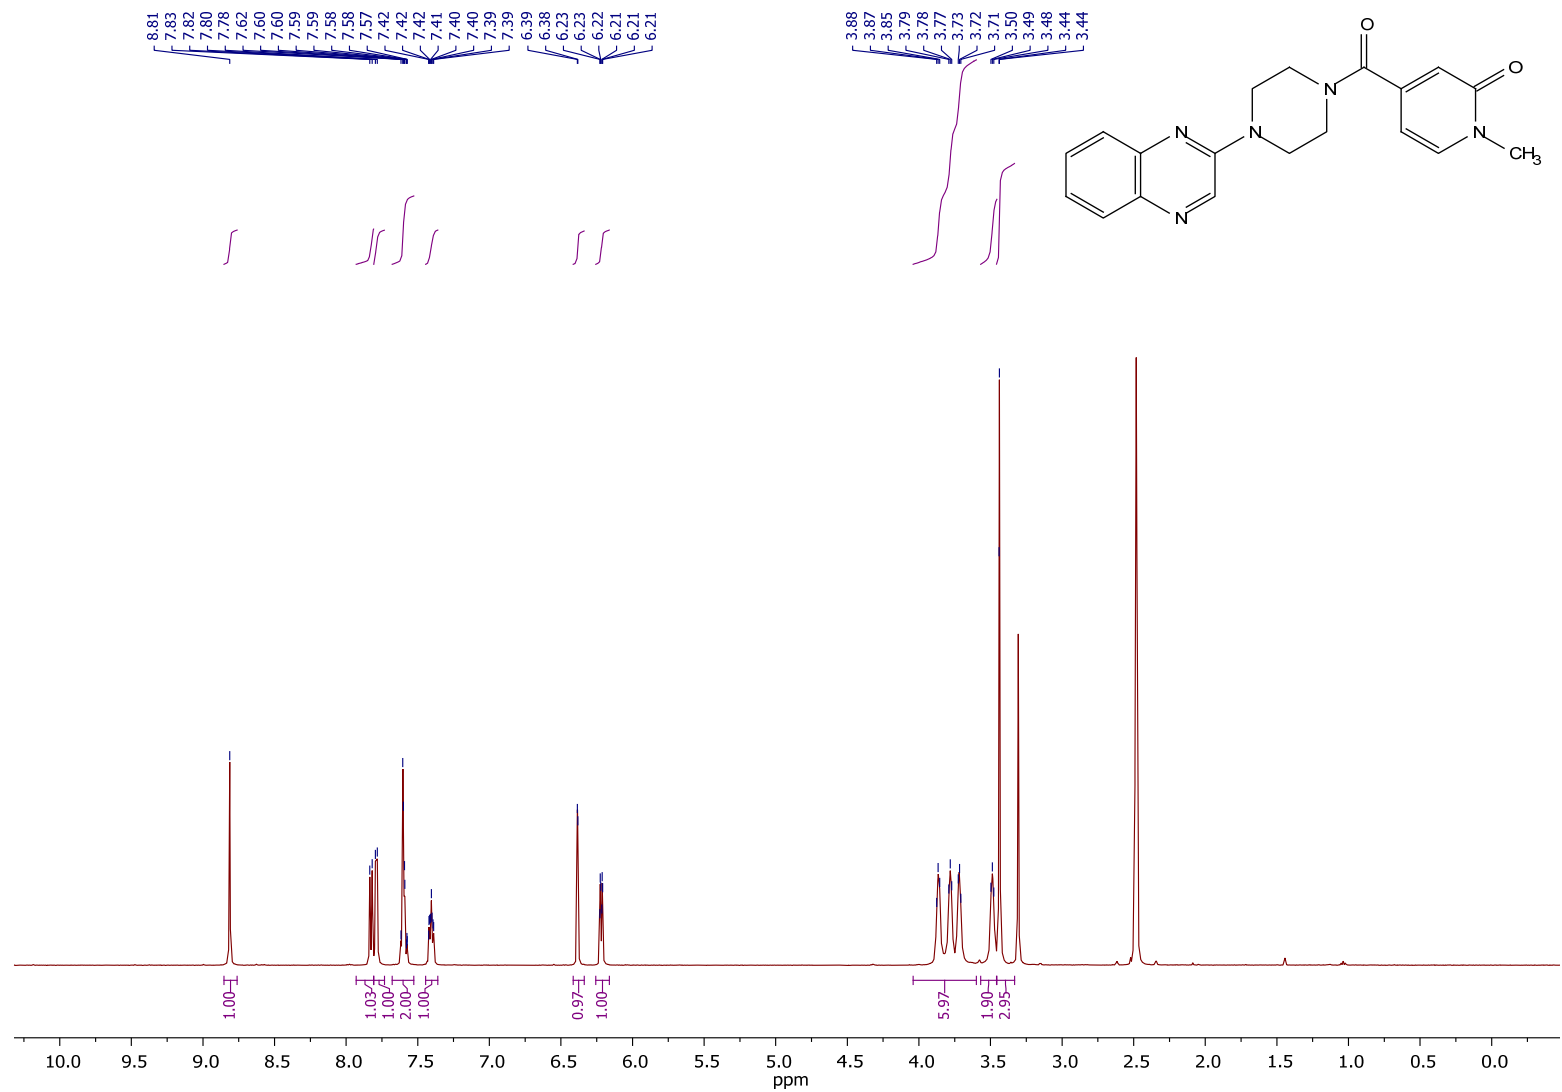

1-Methyl-4-(4-(quinoxalin-2-yl)piperazine-1-carbonyl)pyridin-2(1H)-one (**12**{9,48,3}), <sup>1</sup>H NMR (500 MHz, DMSO-d<sub>6</sub>)

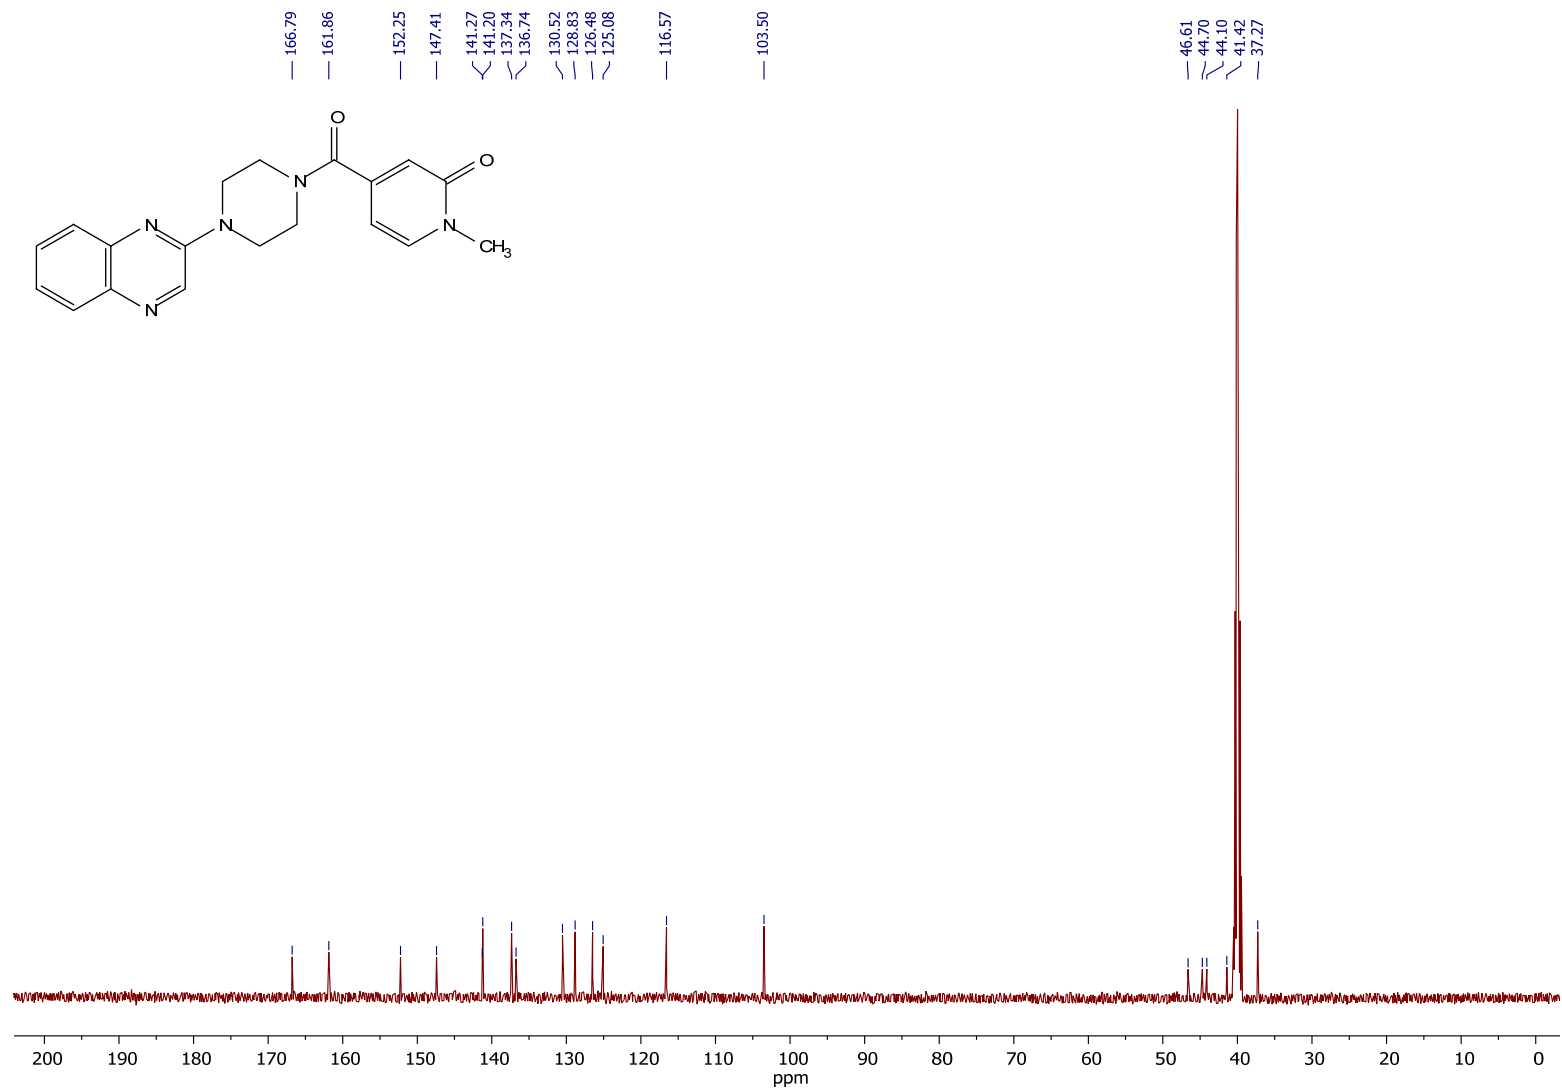

1-Methyl-4-(4-(quinoxalin-2-yl)piperazine-1-carbonyl)pyridin-2(1H)-one (**12**{9,48,3}),  $^{13}\text{C}$  NMR (126 MHz, DMSO- $d_6$ )



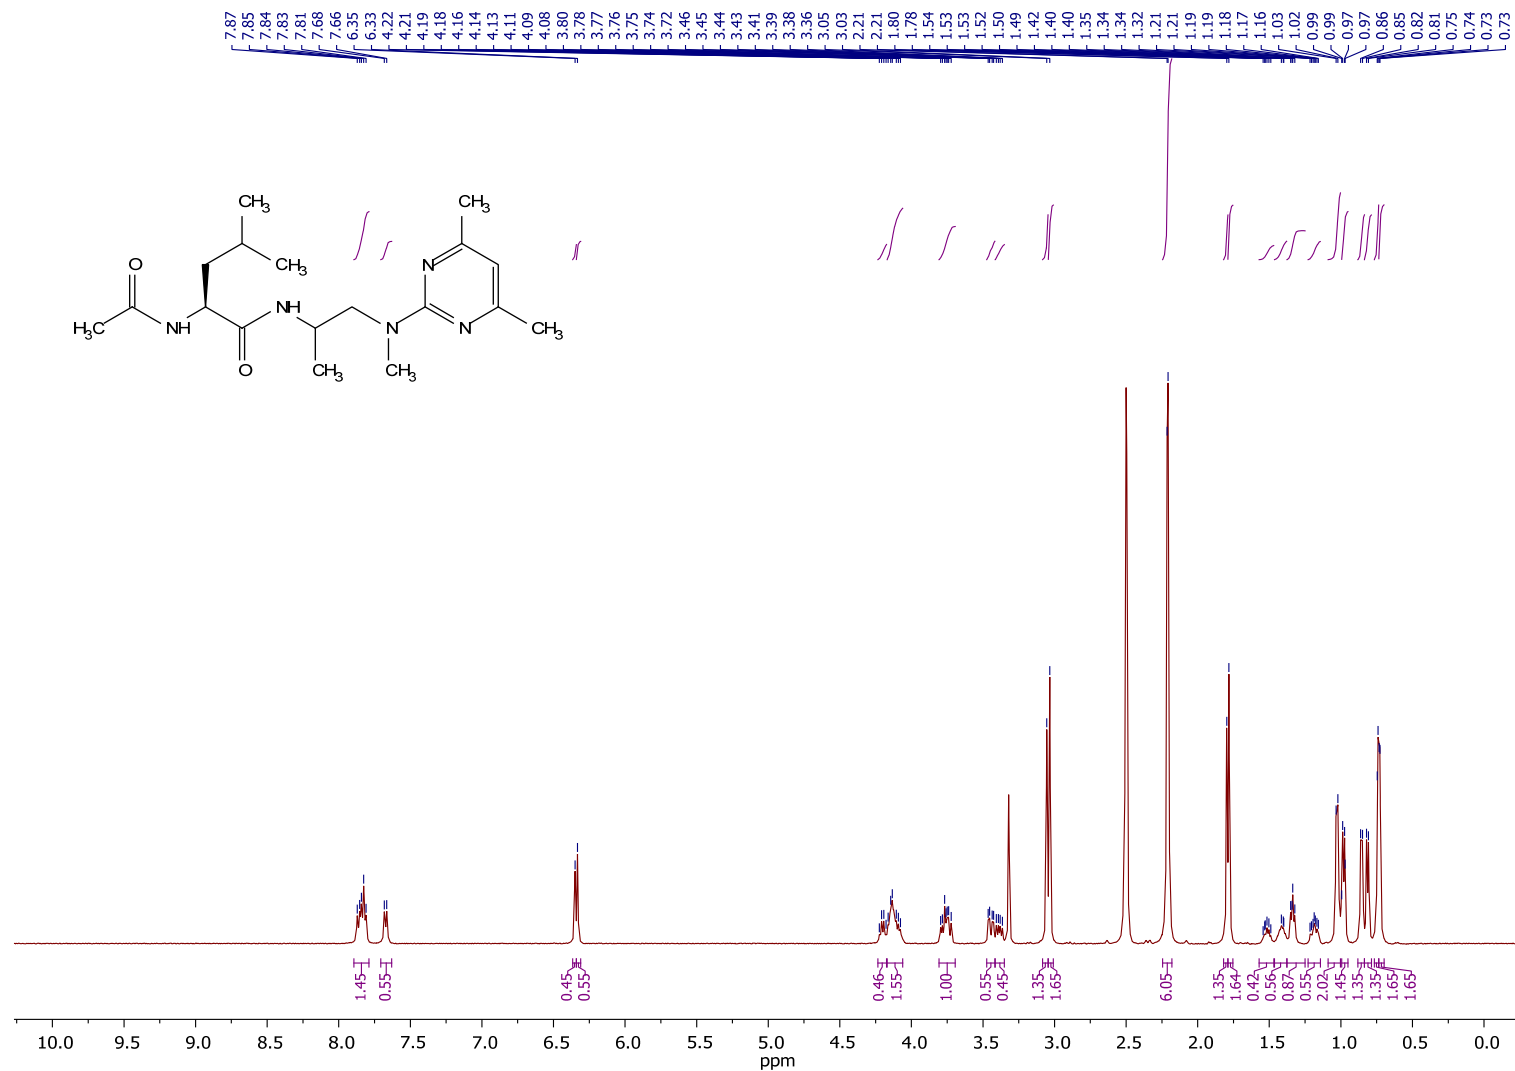

(2S)-2-Acetamido-N-(1-((4,6-dimethylpyrimidin-2-yl)(methyl)amino)propan-2-yl)-4-methylpentanamide (**12**{68,82,32}),  
<sup>1</sup>H NMR (500 MHz, DMSO-*d*<sub>6</sub>)

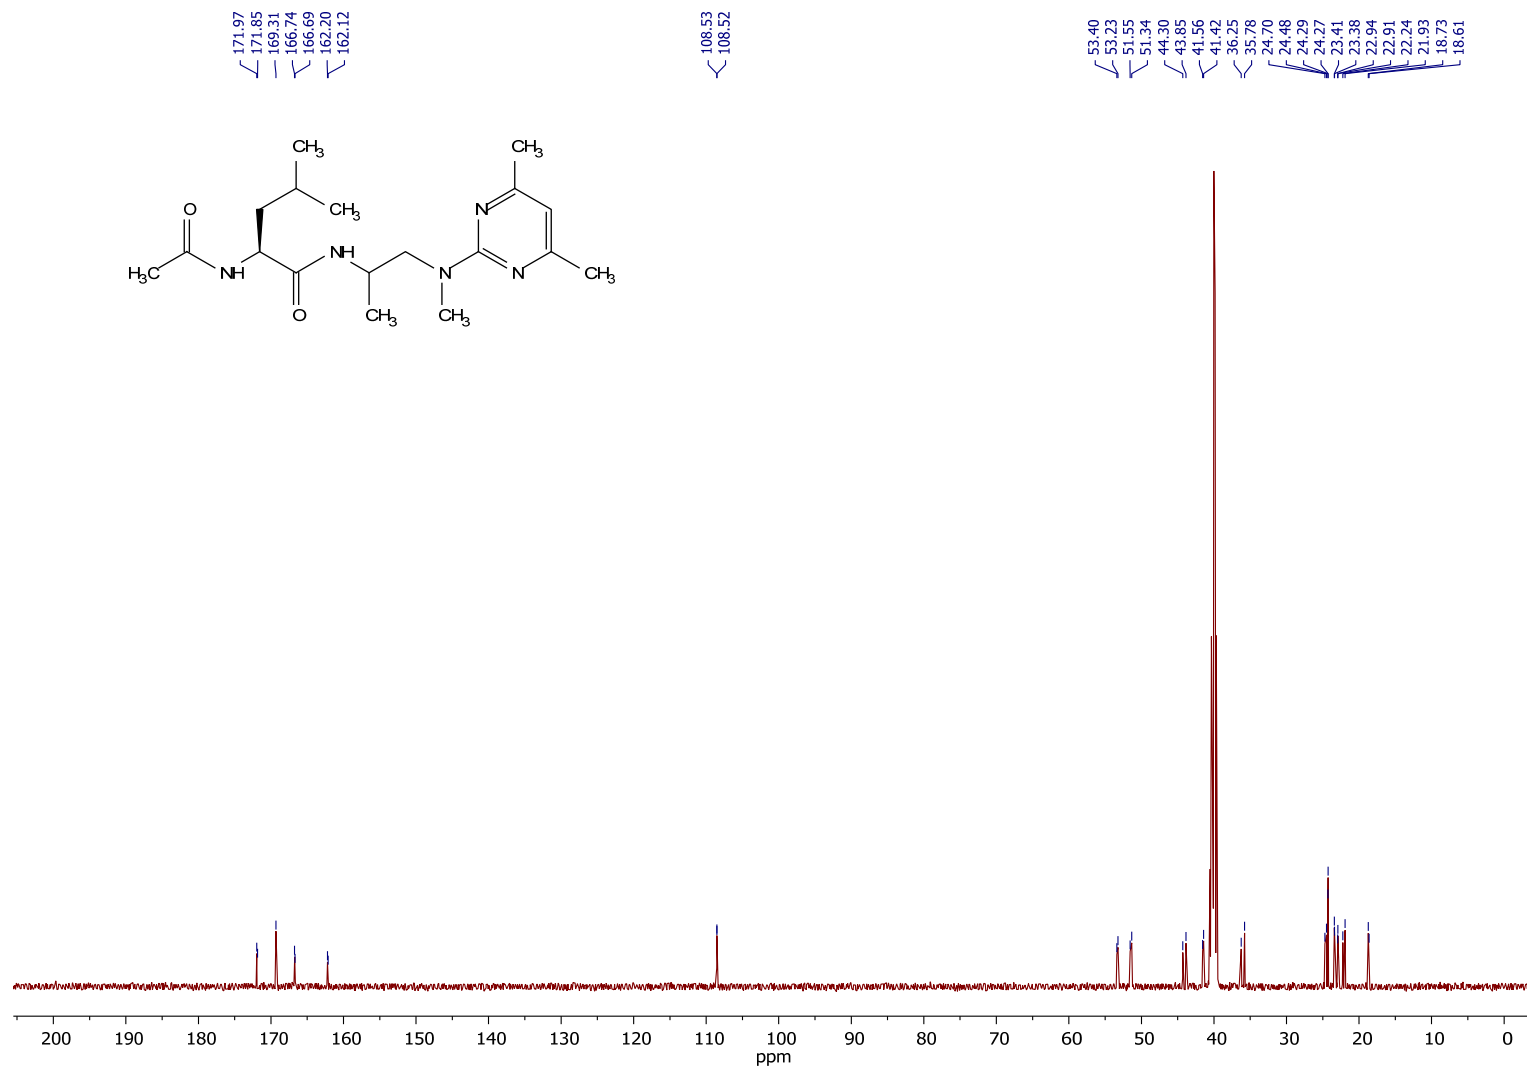

(2S)-2-Acetamido-N-(1-((4,6-dimethylpyrimidin-2-yl)(methyl)amino)propan-2-yl)-4-methylpentanamide (**12** {68,82,32}),  
<sup>13</sup>C NMR (126 MHz, DMSO-*d*<sub>6</sub>)

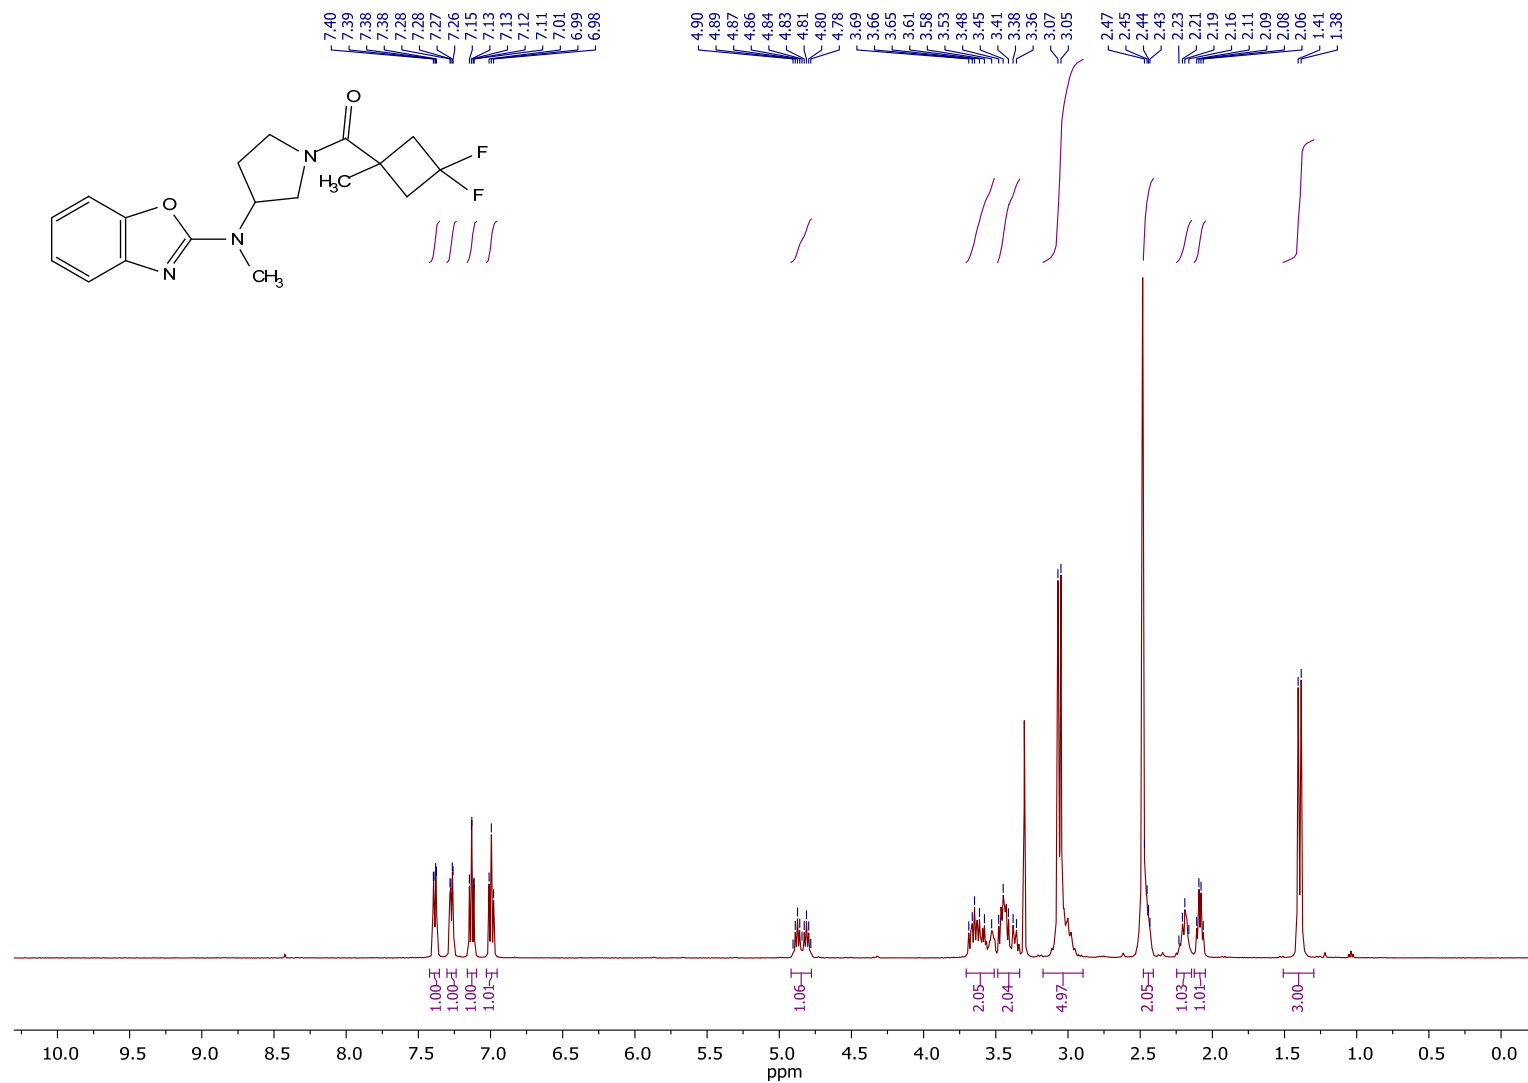

(3-(Benzo[*d*]oxazol-2-yl(methyl)amino)pyrrolidin-1-yl)(3,3-difluoro-1-methylcyclobutyl)methanone (**12**{81,39,30}), <sup>1</sup>H NMR (500 MHz, DMSO-*d*<sub>6</sub>)

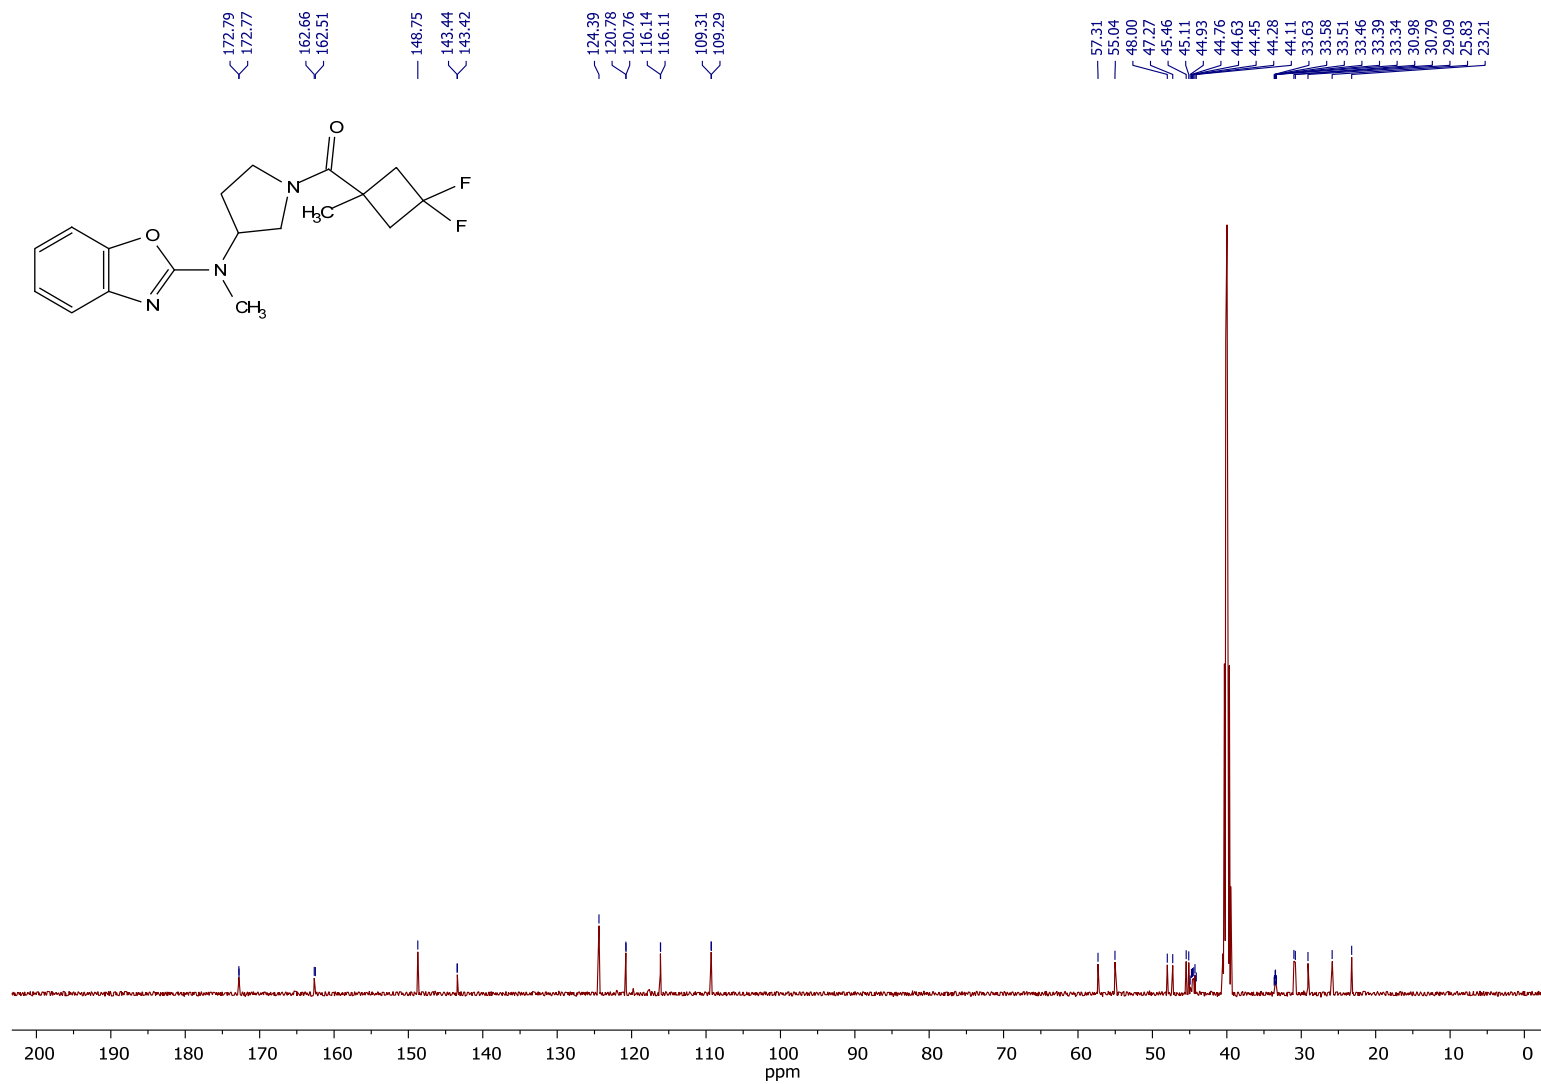

(3-(Benzo[*d*]oxazol-2-yl(methyl)amino)pyrrolidin-1-yl)(3,3-difluoro-1-methylcyclobutyl)methanone (**12** {81,39,30}),  $^{13}\text{C}$  NMR (126 MHz, DMSO- $d_6$ )

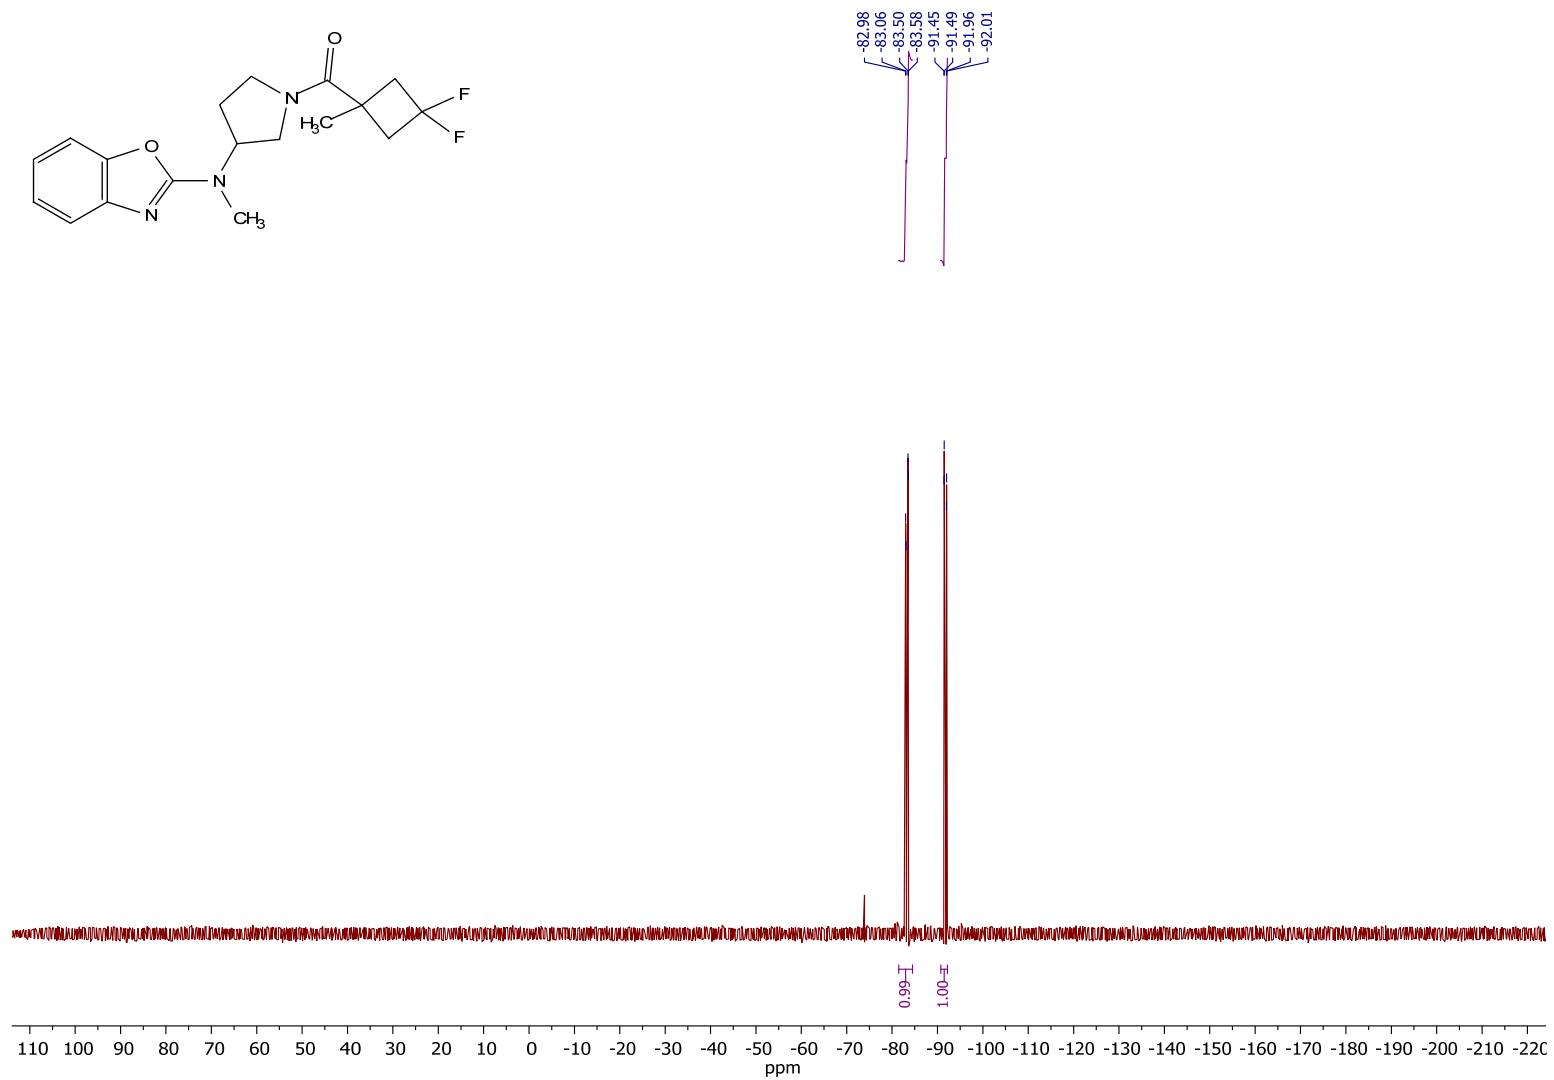

(3-(Benzo[d]oxazol-2-yl(methyl)amino)pyrrolidin-1-yl)(3,3-difluoro-1-methylcyclobutyl)methanone (**12**{81,39,30}),  $^{19}\text{F}$  NMR (376 MHz,  $\text{DMSO-}d_6$ )

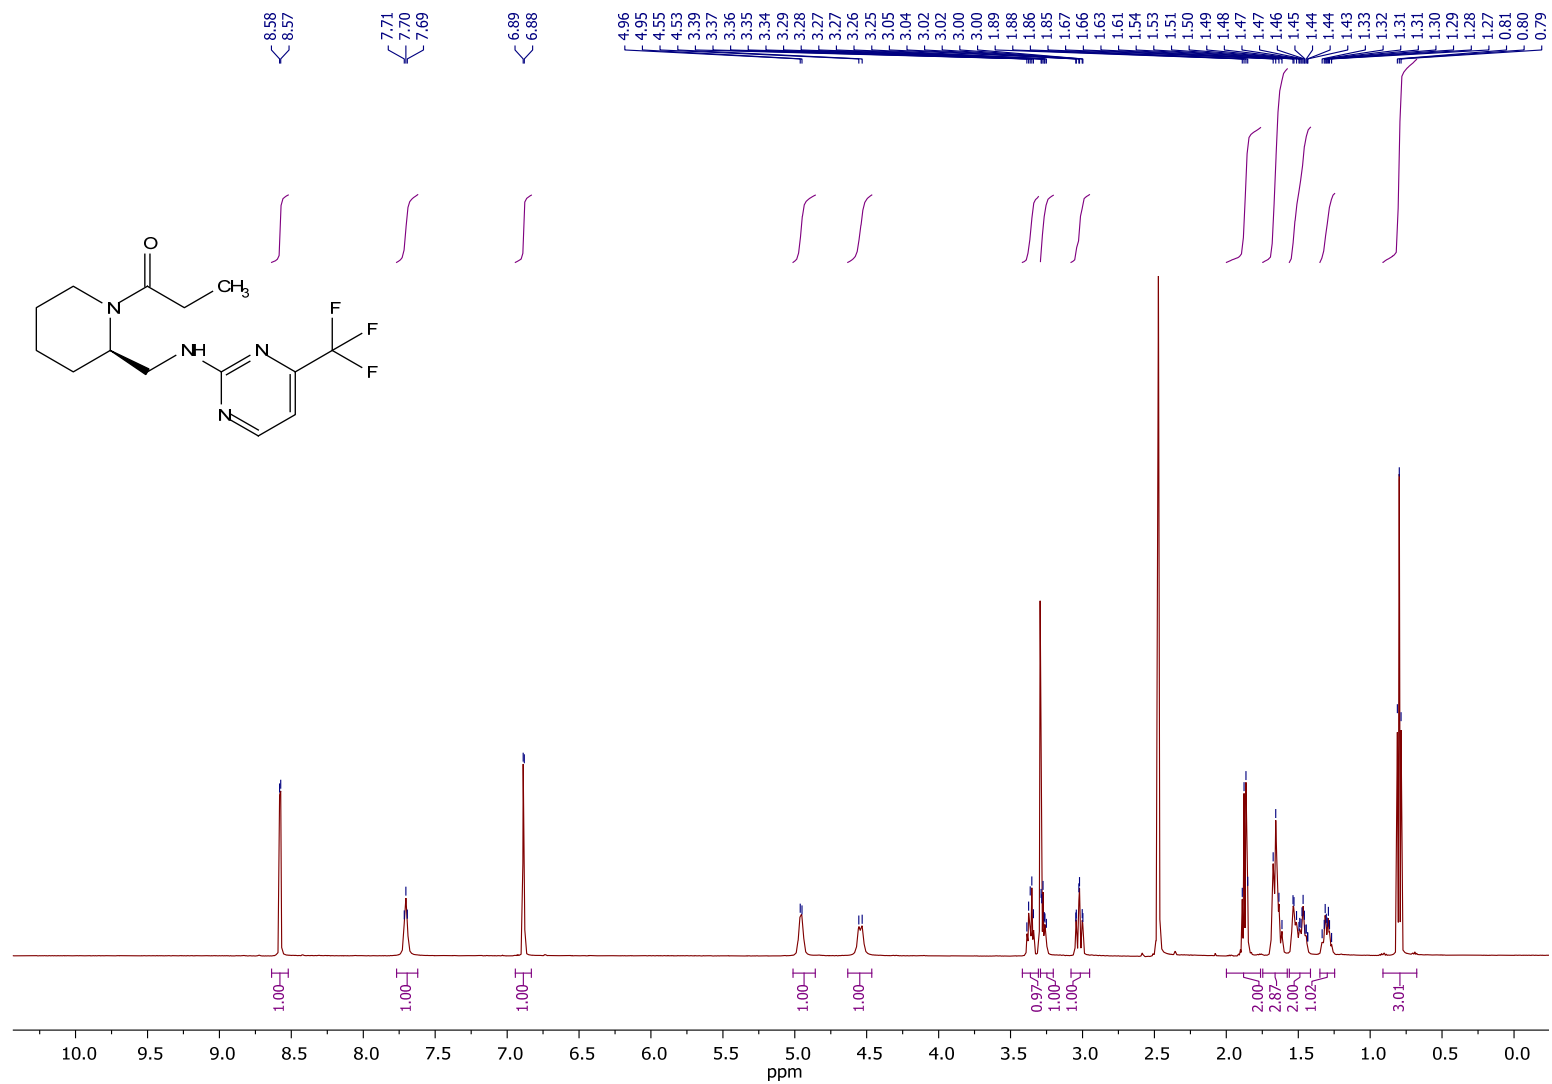

(*R*)-1-(2-(((4-(Trifluoromethyl)pyrimidin-2-yl)amino)methyl)piperidin-1-yl)propan-1-one (**12**{84,40,34}), <sup>1</sup>H NMR (600 MHz, DMSO-*d*<sub>6</sub>)

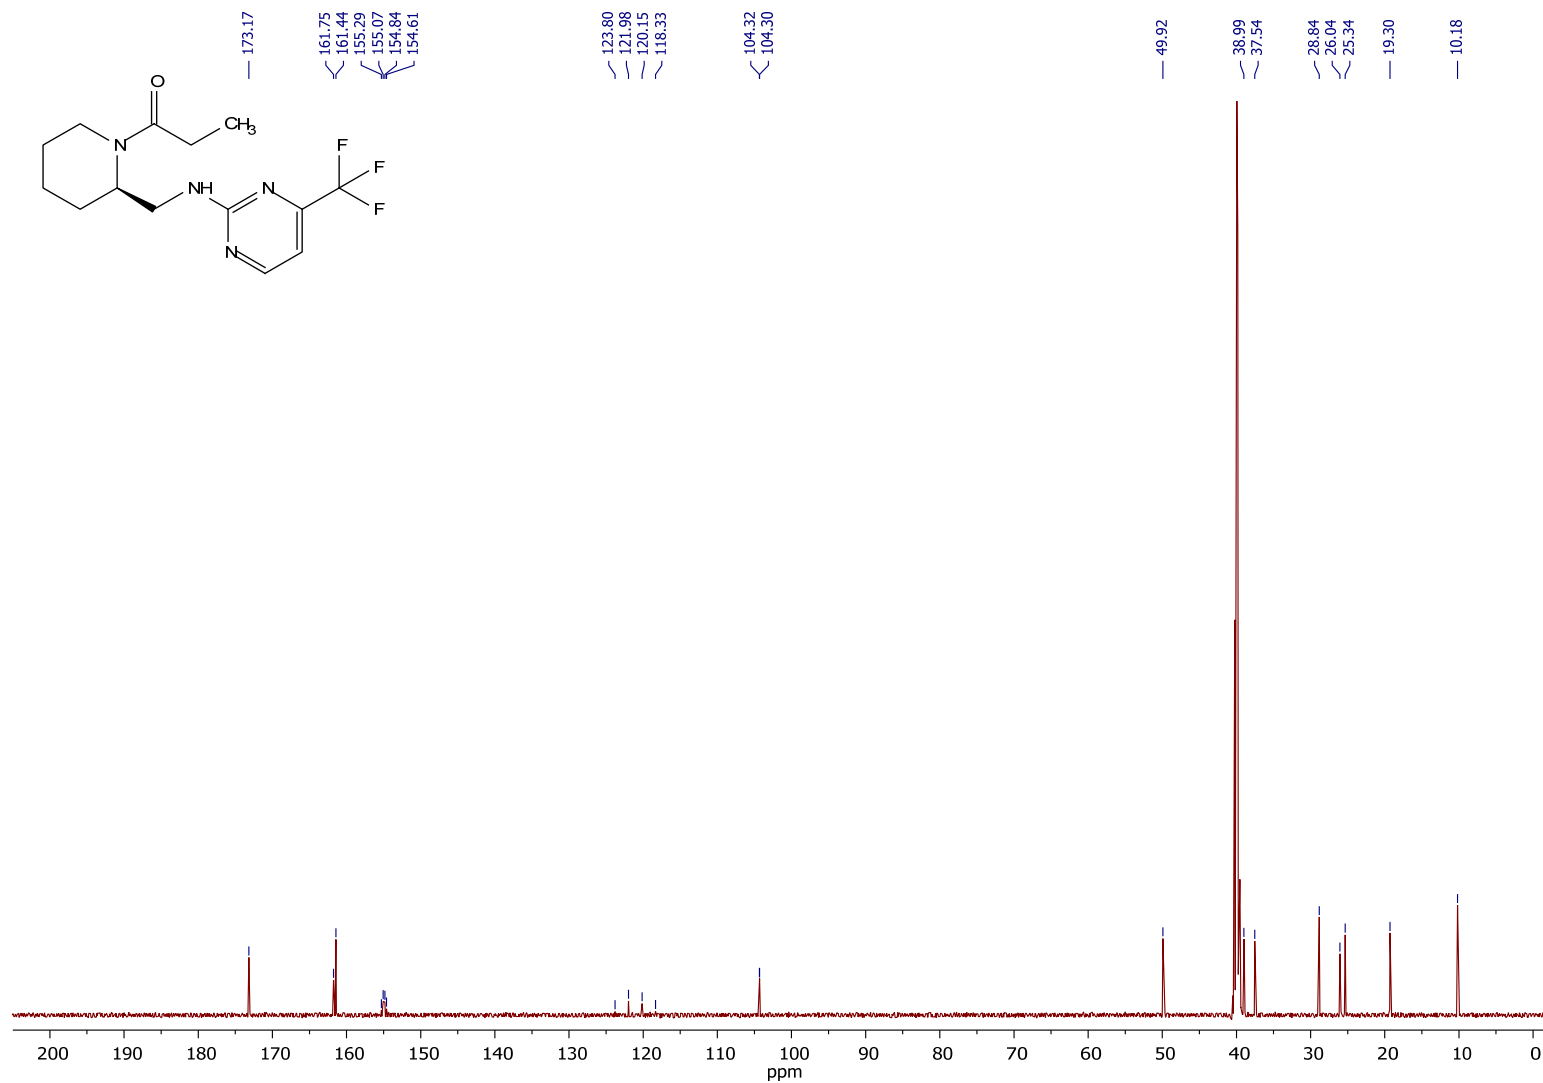

*(R)*-1-(2-(((4-(Trifluoromethyl)pyrimidin-2-yl)amino)methyl)piperidin-1-yl)propan-1-one (**12**{84,40,34}), <sup>13</sup>C NMR (151 MHz, DMSO-*d*<sub>6</sub>)

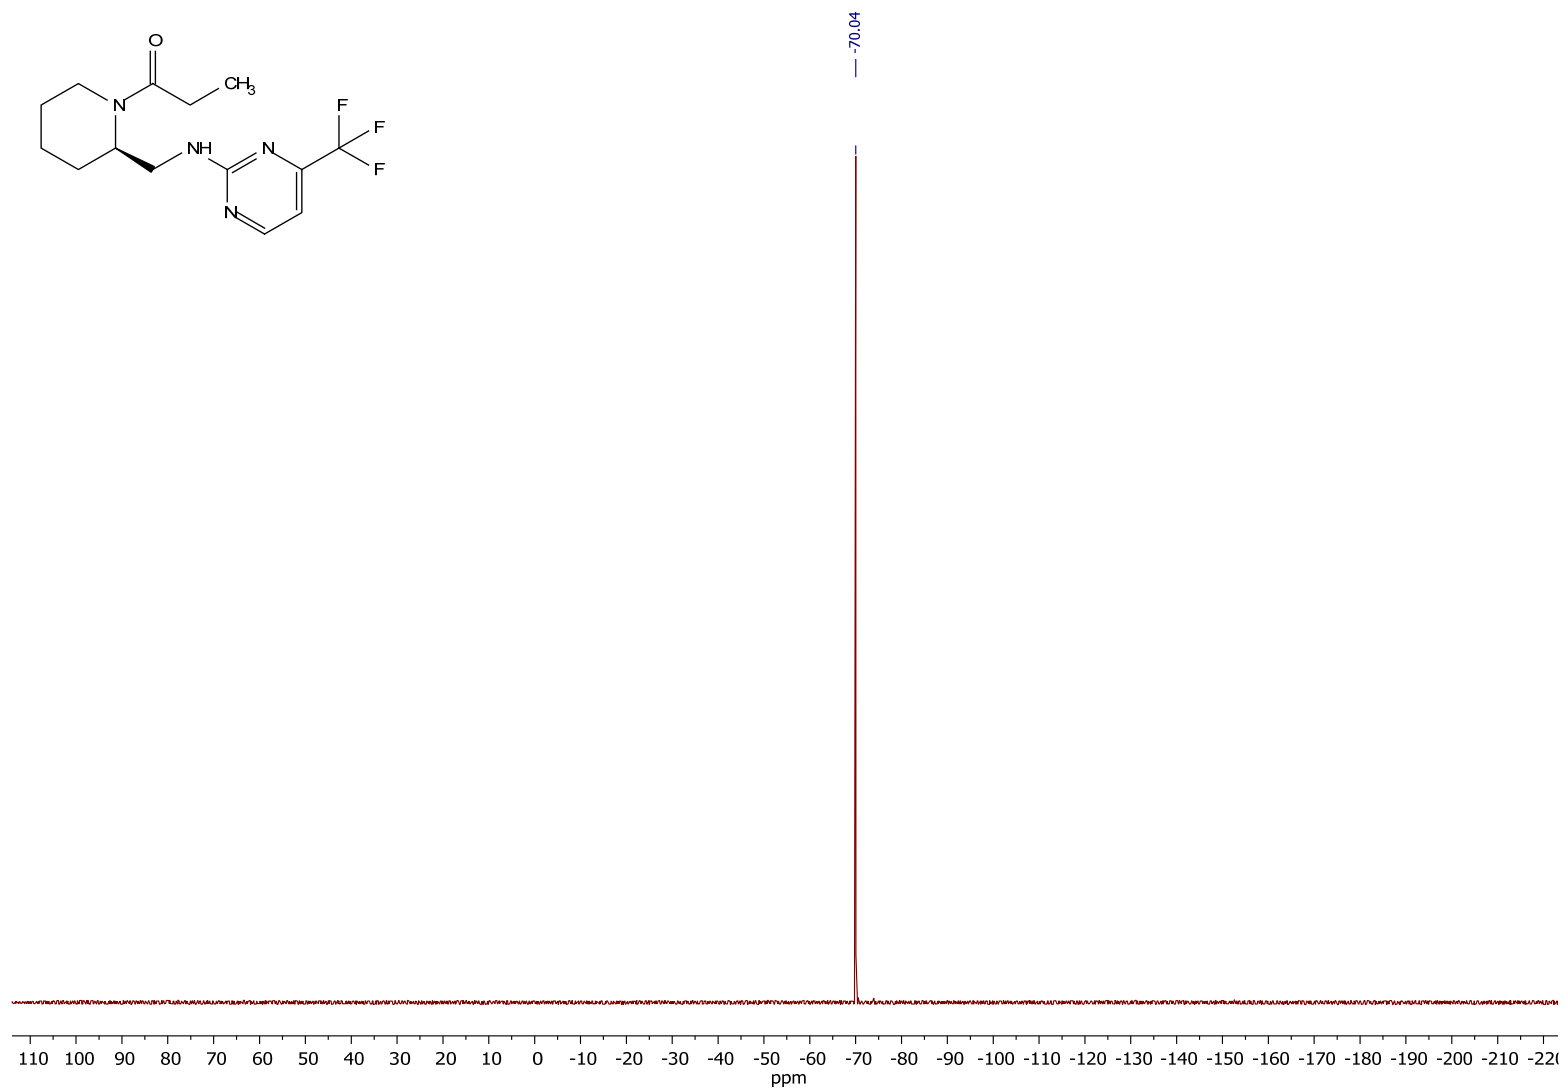

$(R)$ -1-(2-(((4-(Trifluoromethyl)pyrimidin-2-yl)amino)methyl)piperidin-1-yl)propan-1-one (**12**{84,40,34}),  $^{19}\text{F}$  NMR (376 MHz,  $\text{DMSO-}d_6$ )



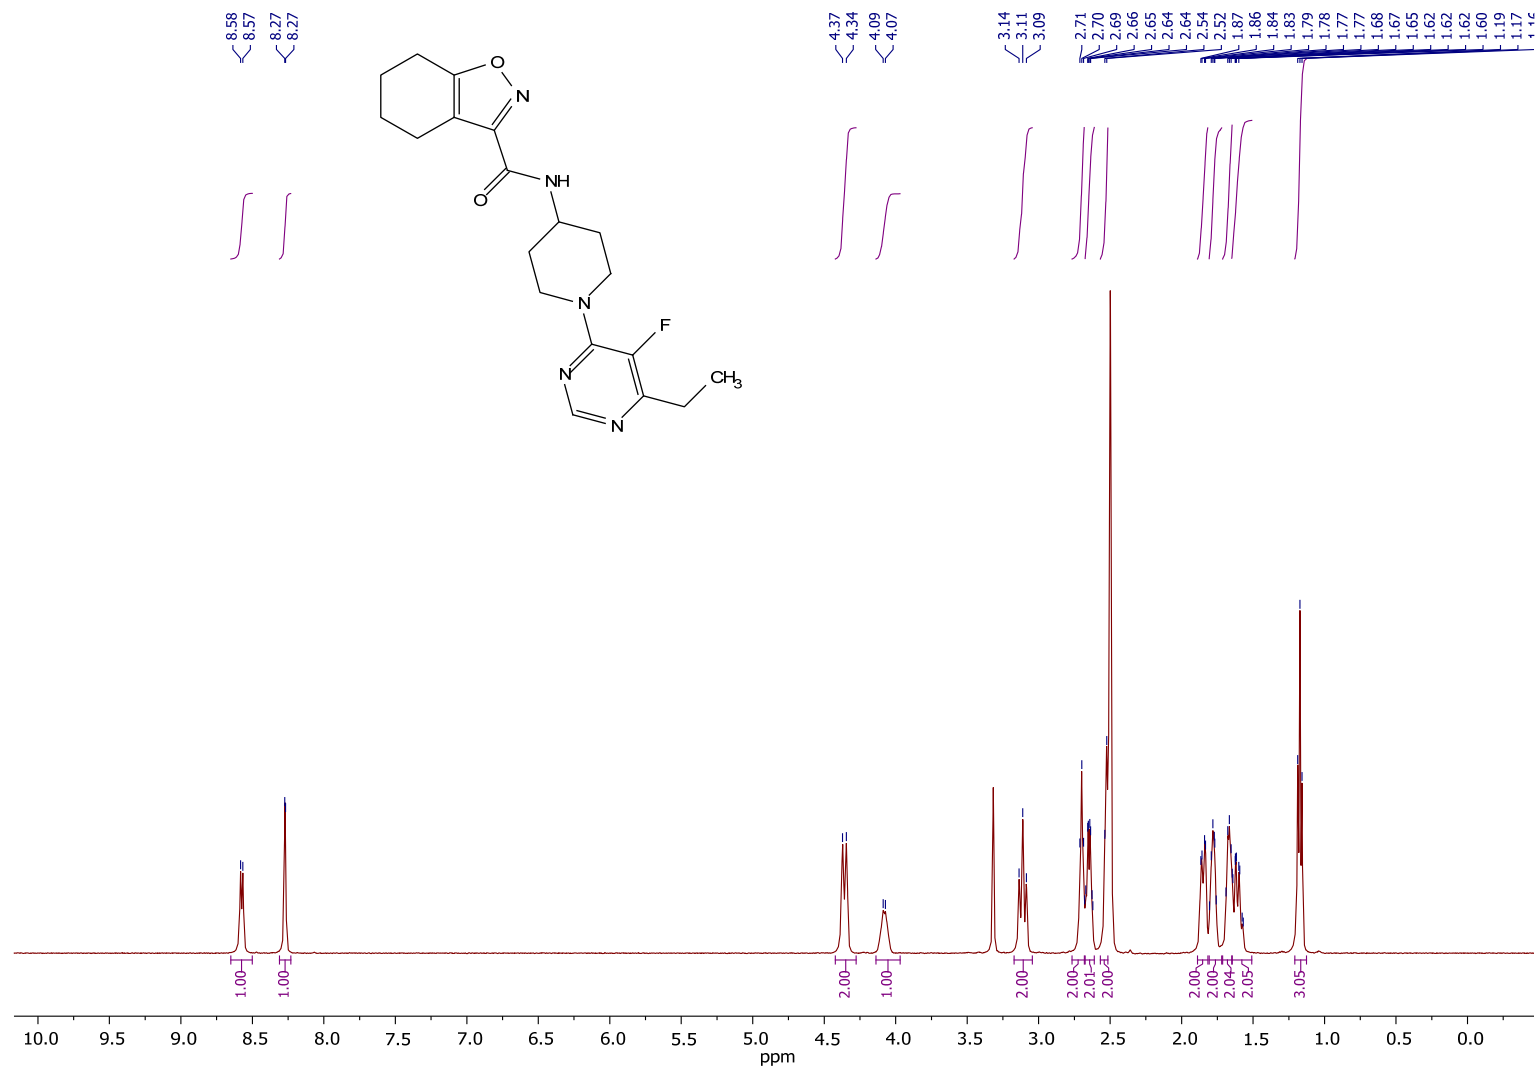

*N*-(1-(6-Ethyl-5-fluoropyrimidin-4-yl)piperidin-4-yl)-4,5,6,7-tetrahydrobenzo[*d*]isoxazole-3-carboxamide (**12**{79,130,39}),  
<sup>1</sup>H NMR (500 MHz, DMSO-*d*<sub>6</sub>)

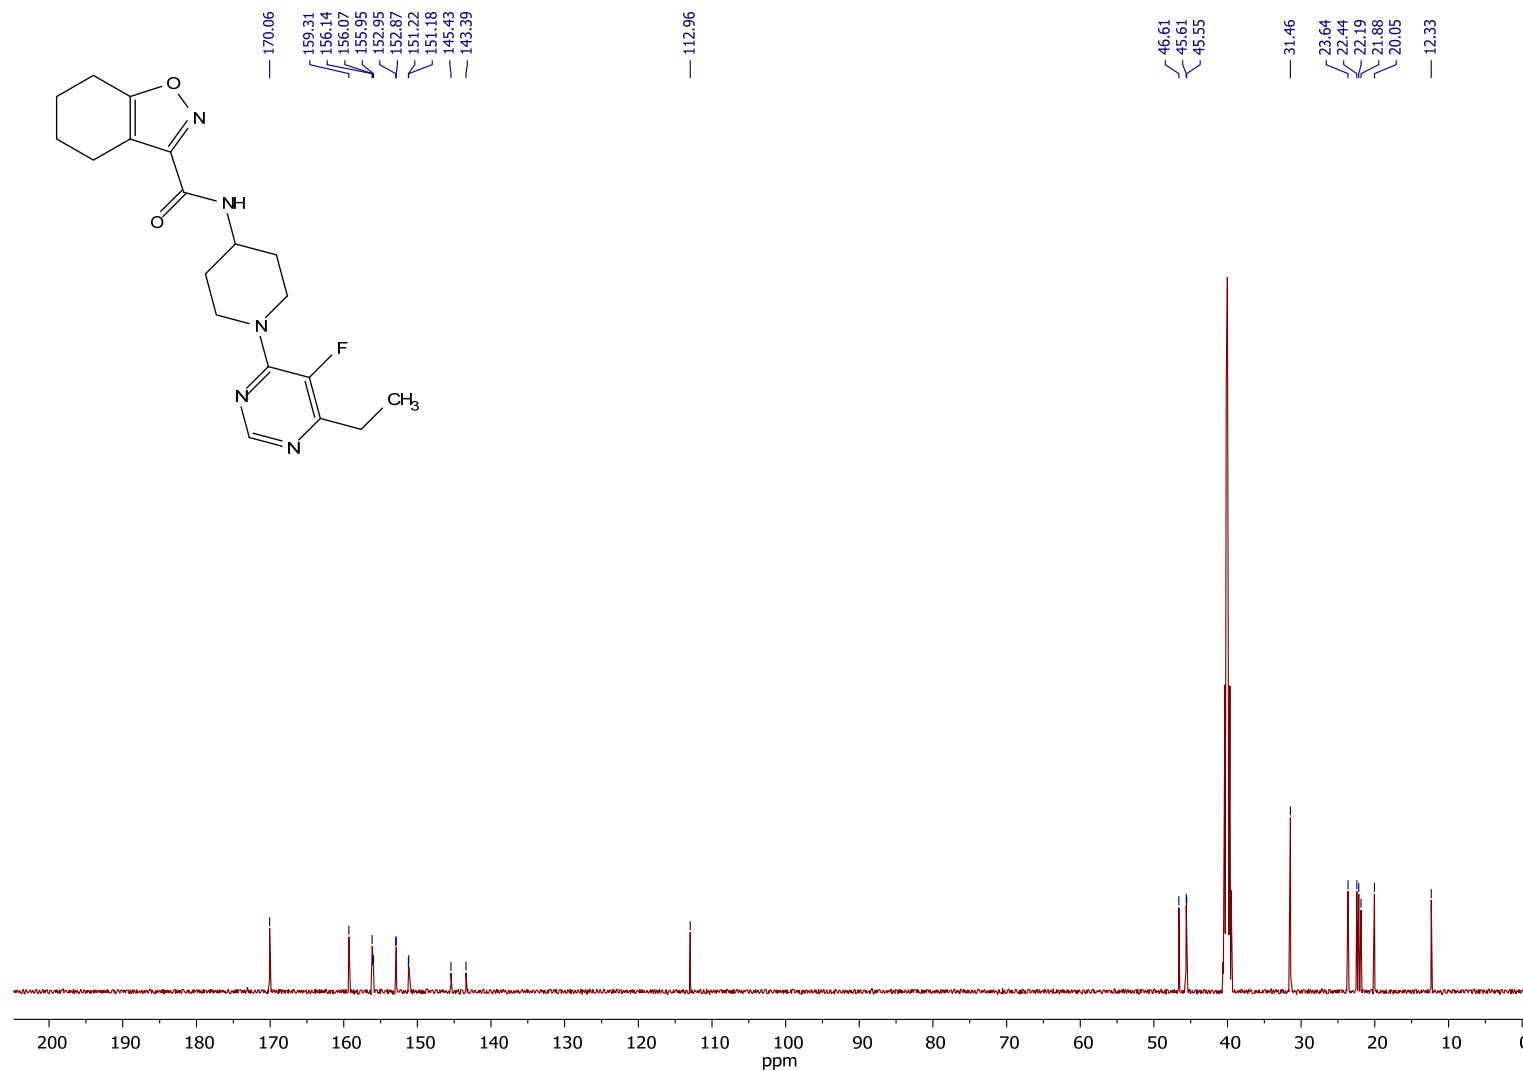

*N*-(1-(6-Ethyl-5-fluoropyrimidin-4-yl)piperidin-4-yl)-4,5,6,7-tetrahydrobenzo[*d*]isoxazole-3-carboxamide (**12** {79,130,39}),  
<sup>13</sup>C NMR (126 MHz, DMSO-*d*<sub>6</sub>)

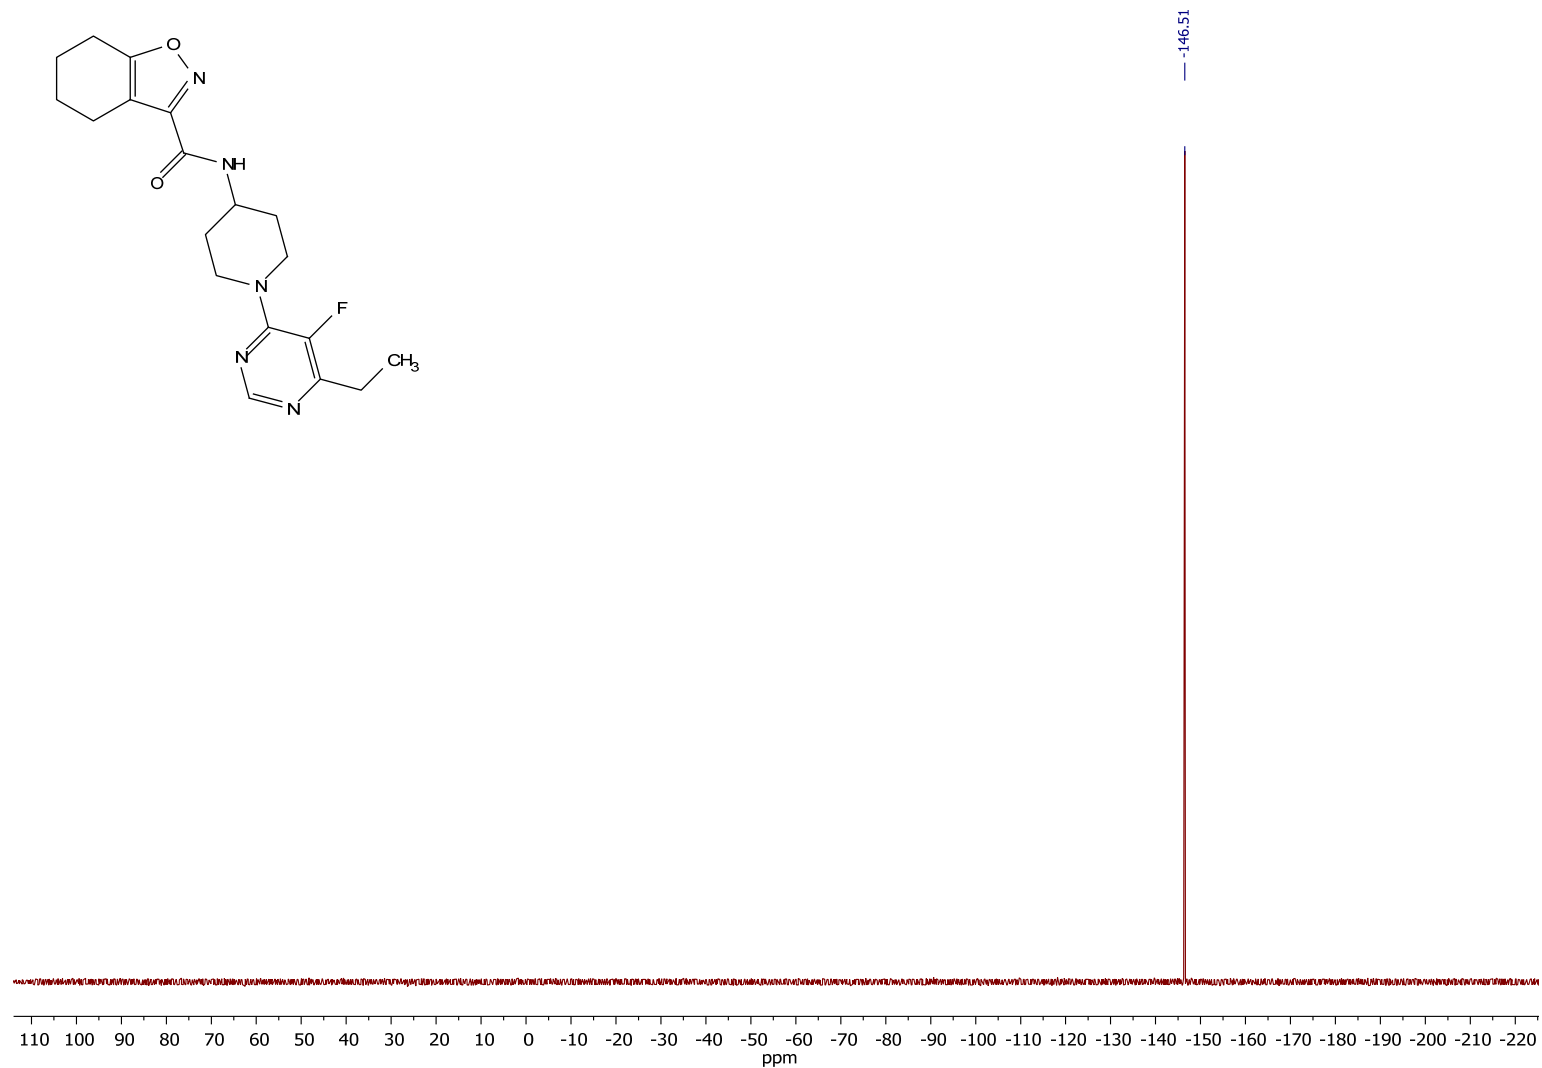

*N*-(1-(6-Ethyl-5-fluoropyrimidin-4-yl)piperidin-4-yl)-4,5,6,7-tetrahydrobenzo[*d*]isoxazole-3-carboxamide (**12**{79,130,39}),  
 $^{19}\text{F}$  NMR (376 MHz,  $\text{DMSO-}d_6$ )

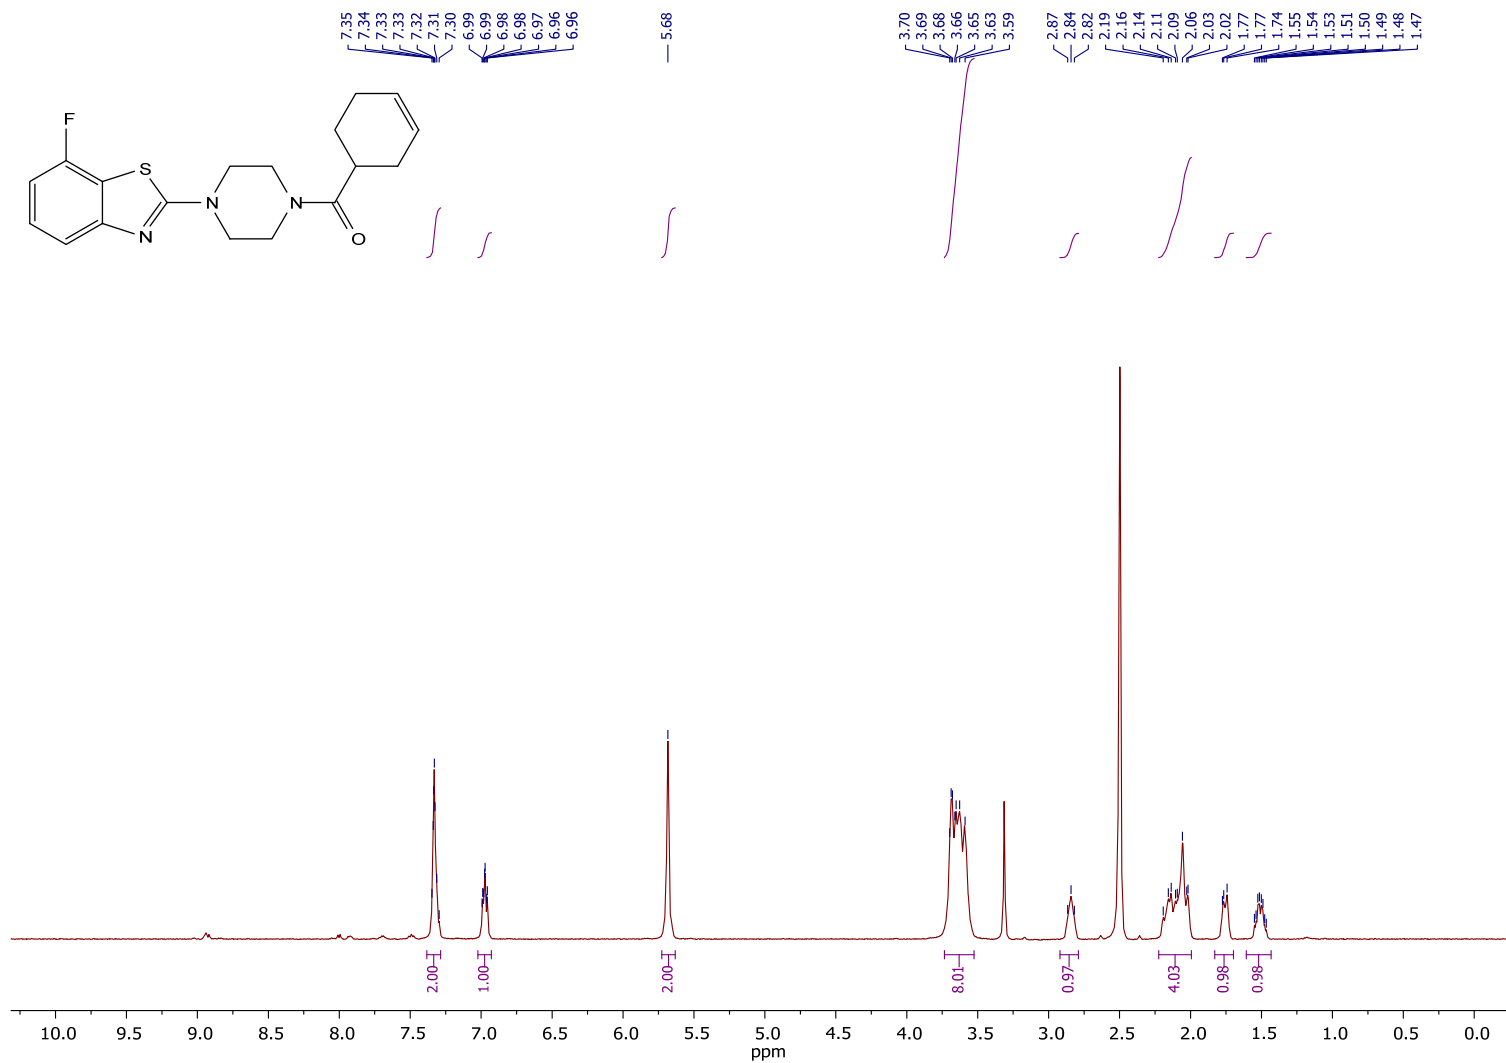

Cyclohex-3-en-1-yl(4-(7-fluorobenzo[*d*]thiazol-2-yl)piperazin-1-yl)methanone (**12**{9,28,43}), <sup>1</sup>H NMR (500 MHz, DMSO-*d*<sub>6</sub>)

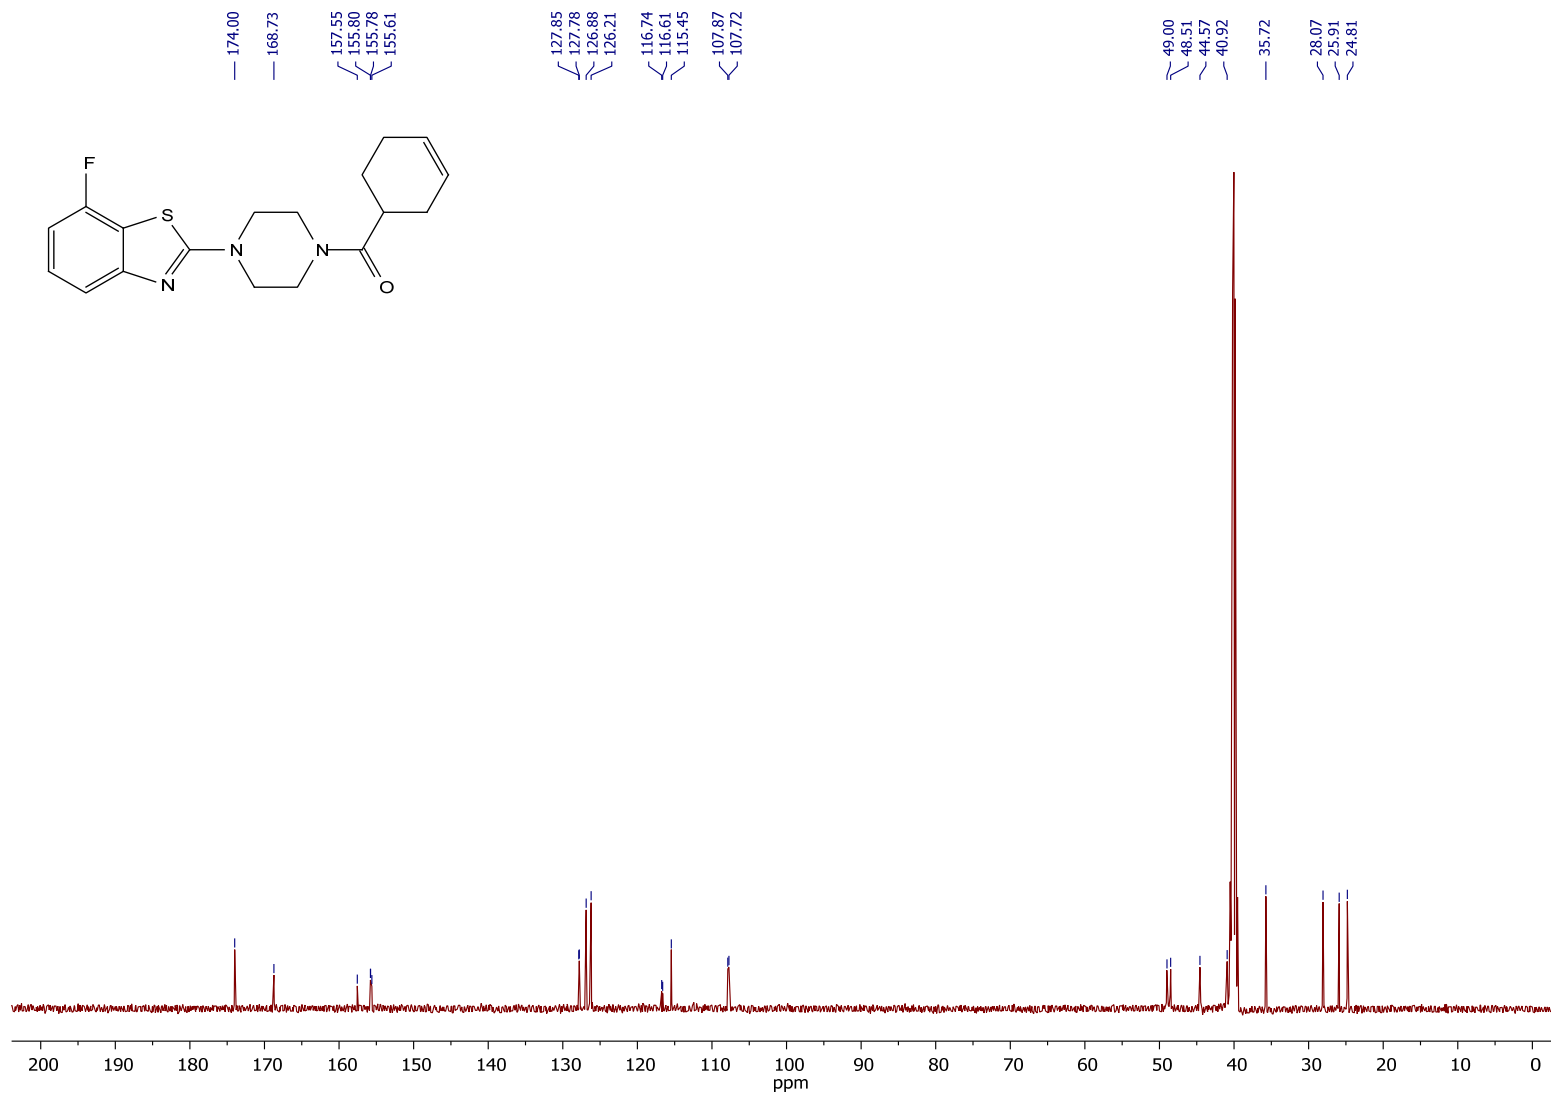

Cyclohex-3-en-1-yl(4-(7-fluorobenzo[*d*]thiazol-2-yl)piperazin-1-yl)methanone (**12**{9,28,43}),  $^{13}\text{C}$  NMR (126 MHz, DMSO- $d_6$ )

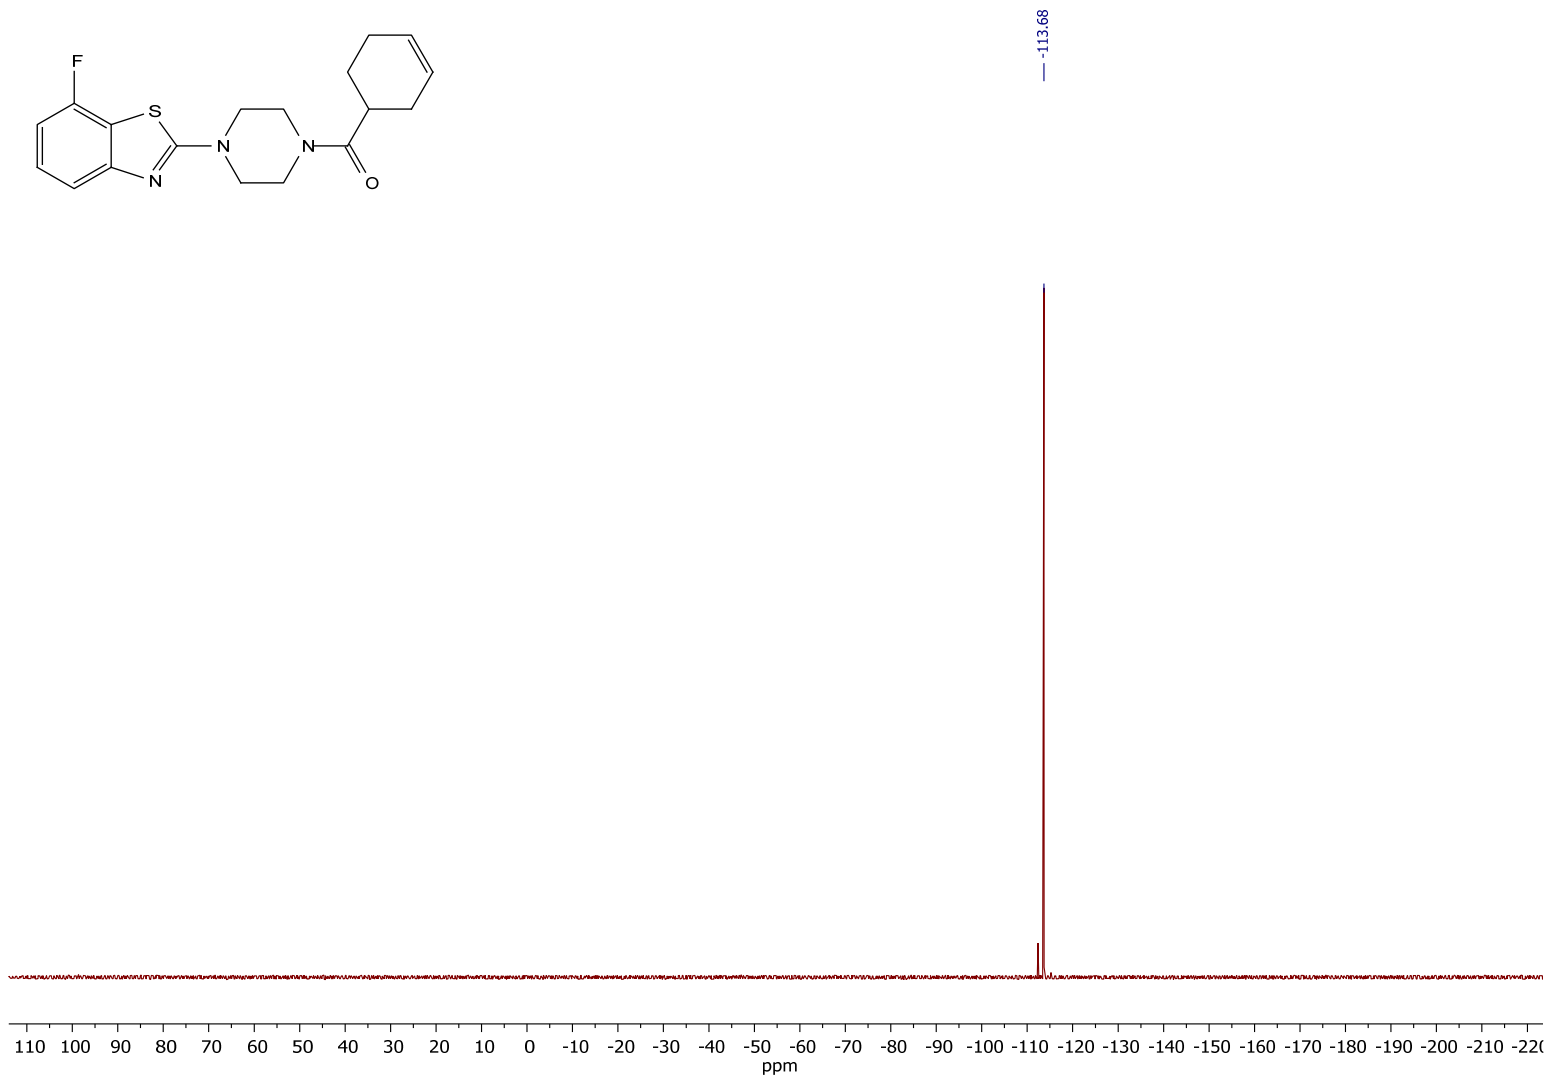

Cyclohex-3-en-1-yl(4-(7-fluorobenzo[d]thiazol-2-yl)piperazin-1-yl)methanone (**12**{9,28,43}), <sup>19</sup>F NMR (376 MHz, DMSO-*d*<sub>6</sub>)

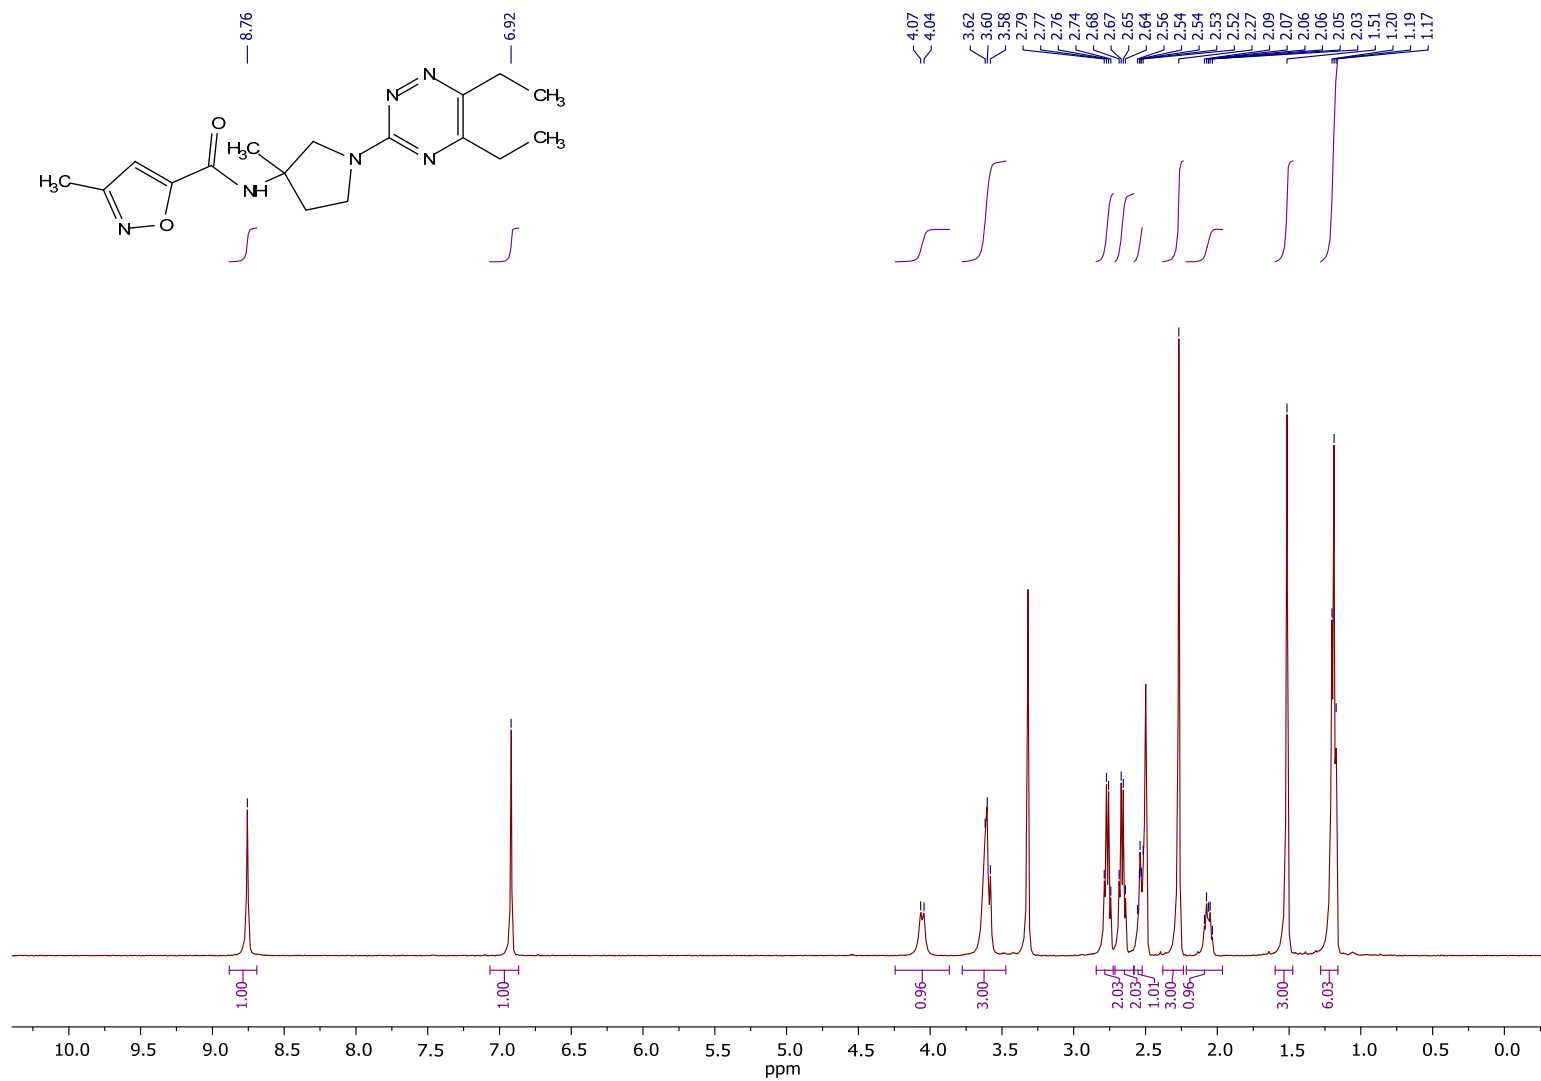

*N*-(1-(5,6-Diethyl-1,2,4-triazin-3-yl)-3-methylpyrrolidin-3-yl)-3-methylisoxazole-5-carboxamide **12**{49,150,31}, <sup>1</sup>H NMR (500 MHz, DMSO-*d*<sub>6</sub>)

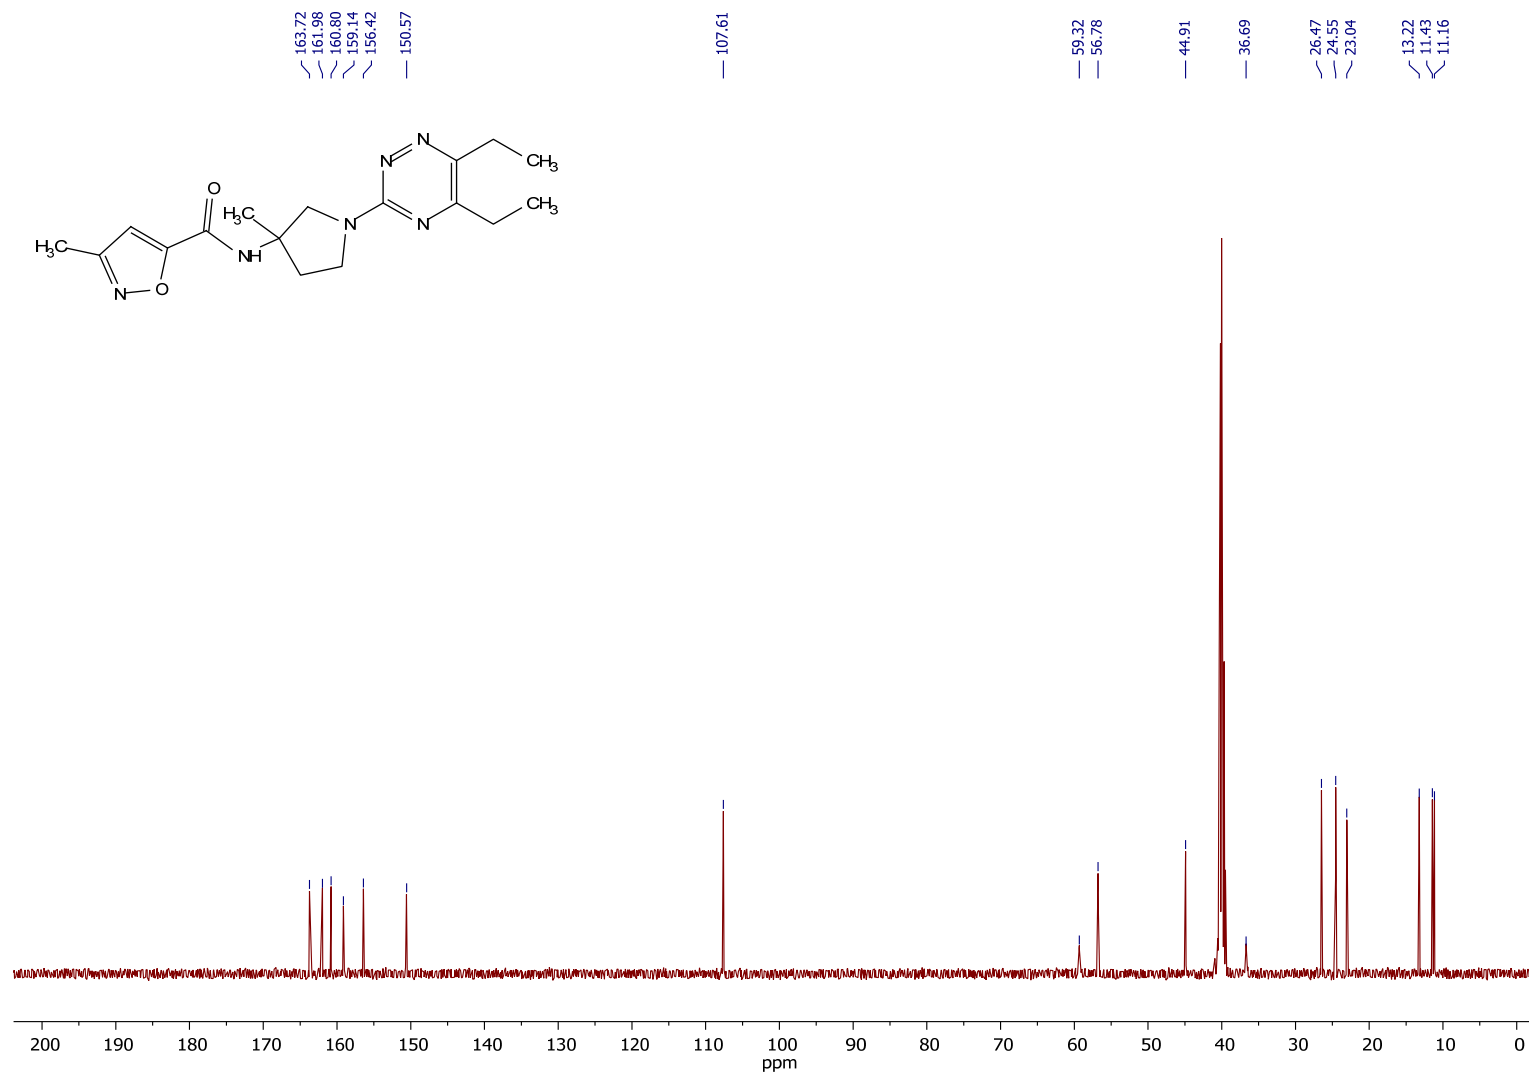

*N*-(1-(5,6-Diethyl-1,2,4-triazin-3-yl)-3-methylpyrrolidin-3-yl)-3-methylisoxazole-5-carboxamide (**12**{49,150,31}), <sup>13</sup>C NMR (126 MHz, DMSO-*d*<sub>6</sub>)



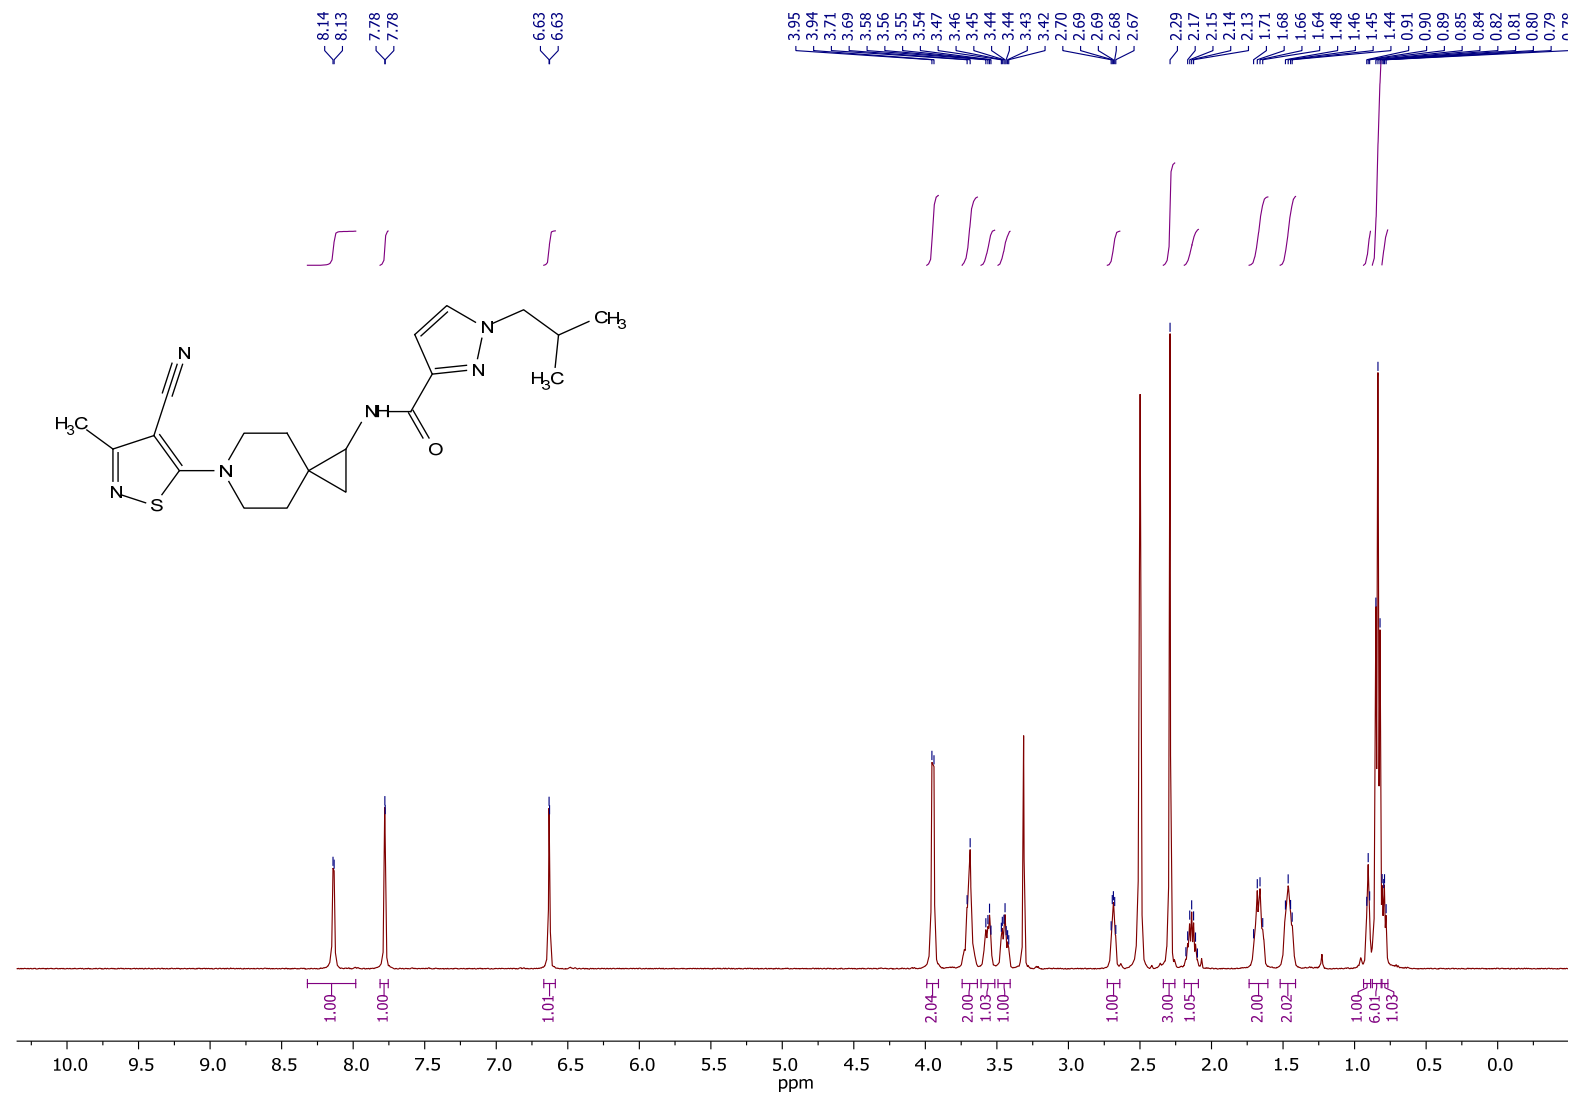

*N*-(6-(4-Cyano-3-methylisothiazol-5-yl)-6-azaspiro[2.5]octan-1-yl)-1-isobutyl-1*H*-pyrazole-3-carboxamide (**12**{31,29,13}),  
<sup>1</sup>H NMR (500 MHz, DMSO-*d*<sub>6</sub>)

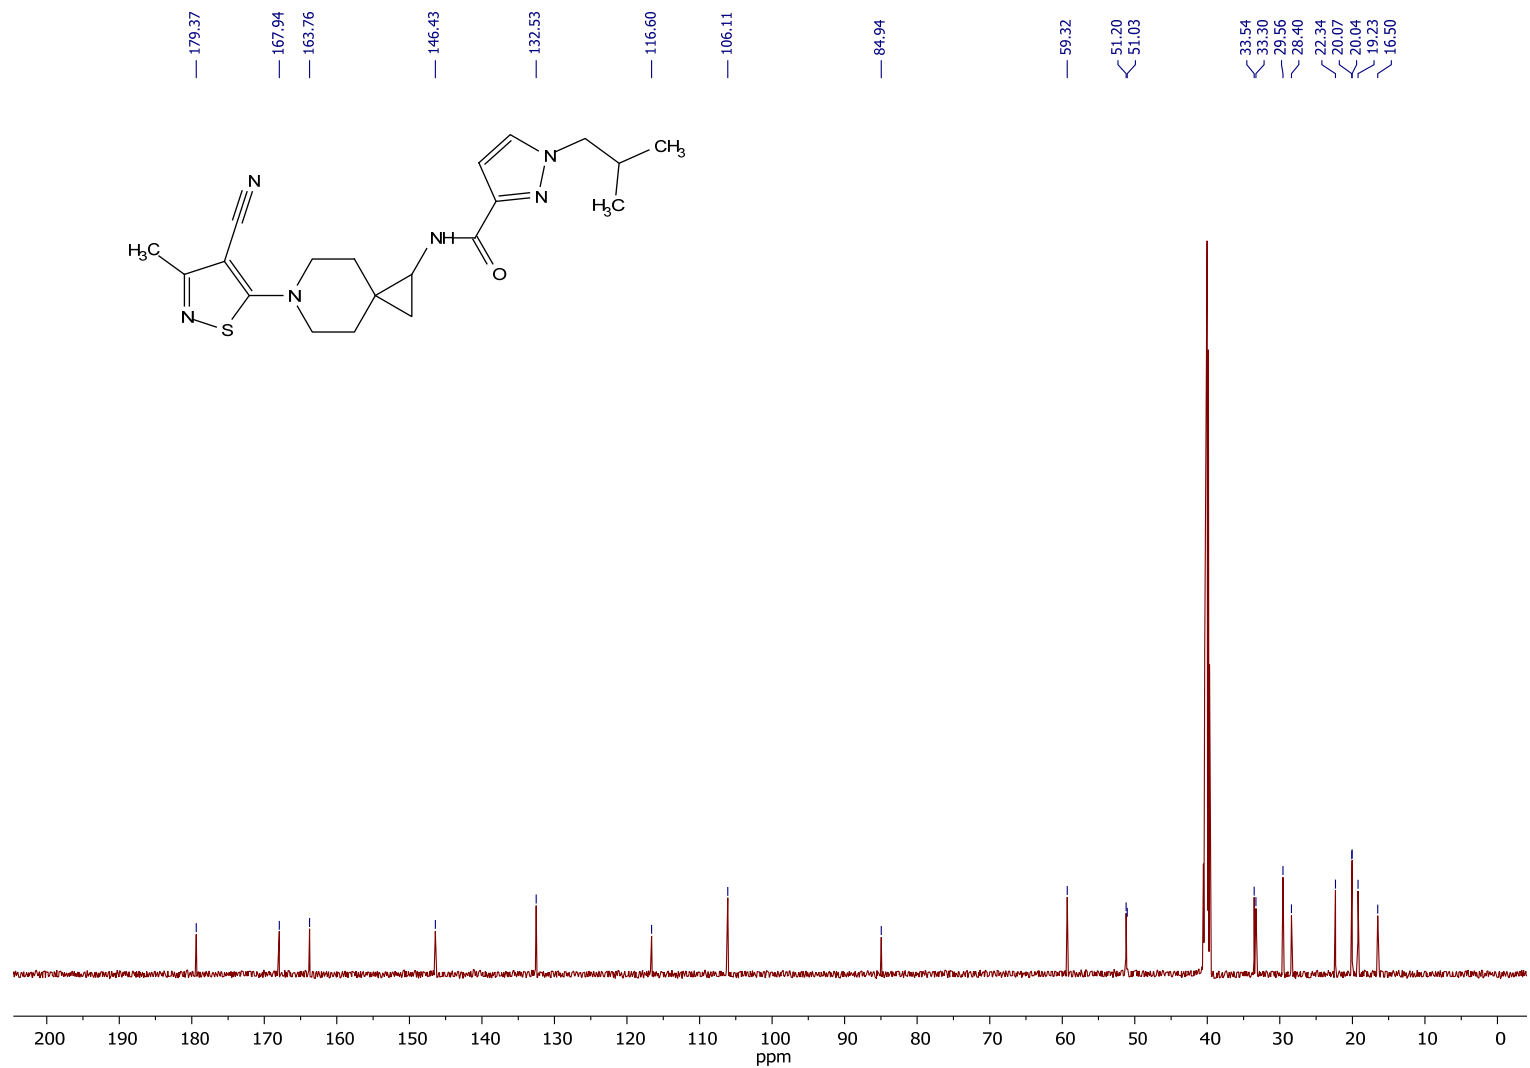

*N*-(6-(4-Cyano-3-methylisothiazol-5-yl)-6-azaspiro[2.5]octan-1-yl)-1-isobutyl-1*H*-pyrazole-3-carboxamide (**12**{31,29,13}),  
 $^{13}\text{C}$  NMR (126 MHz, DMSO- $d_6$ )

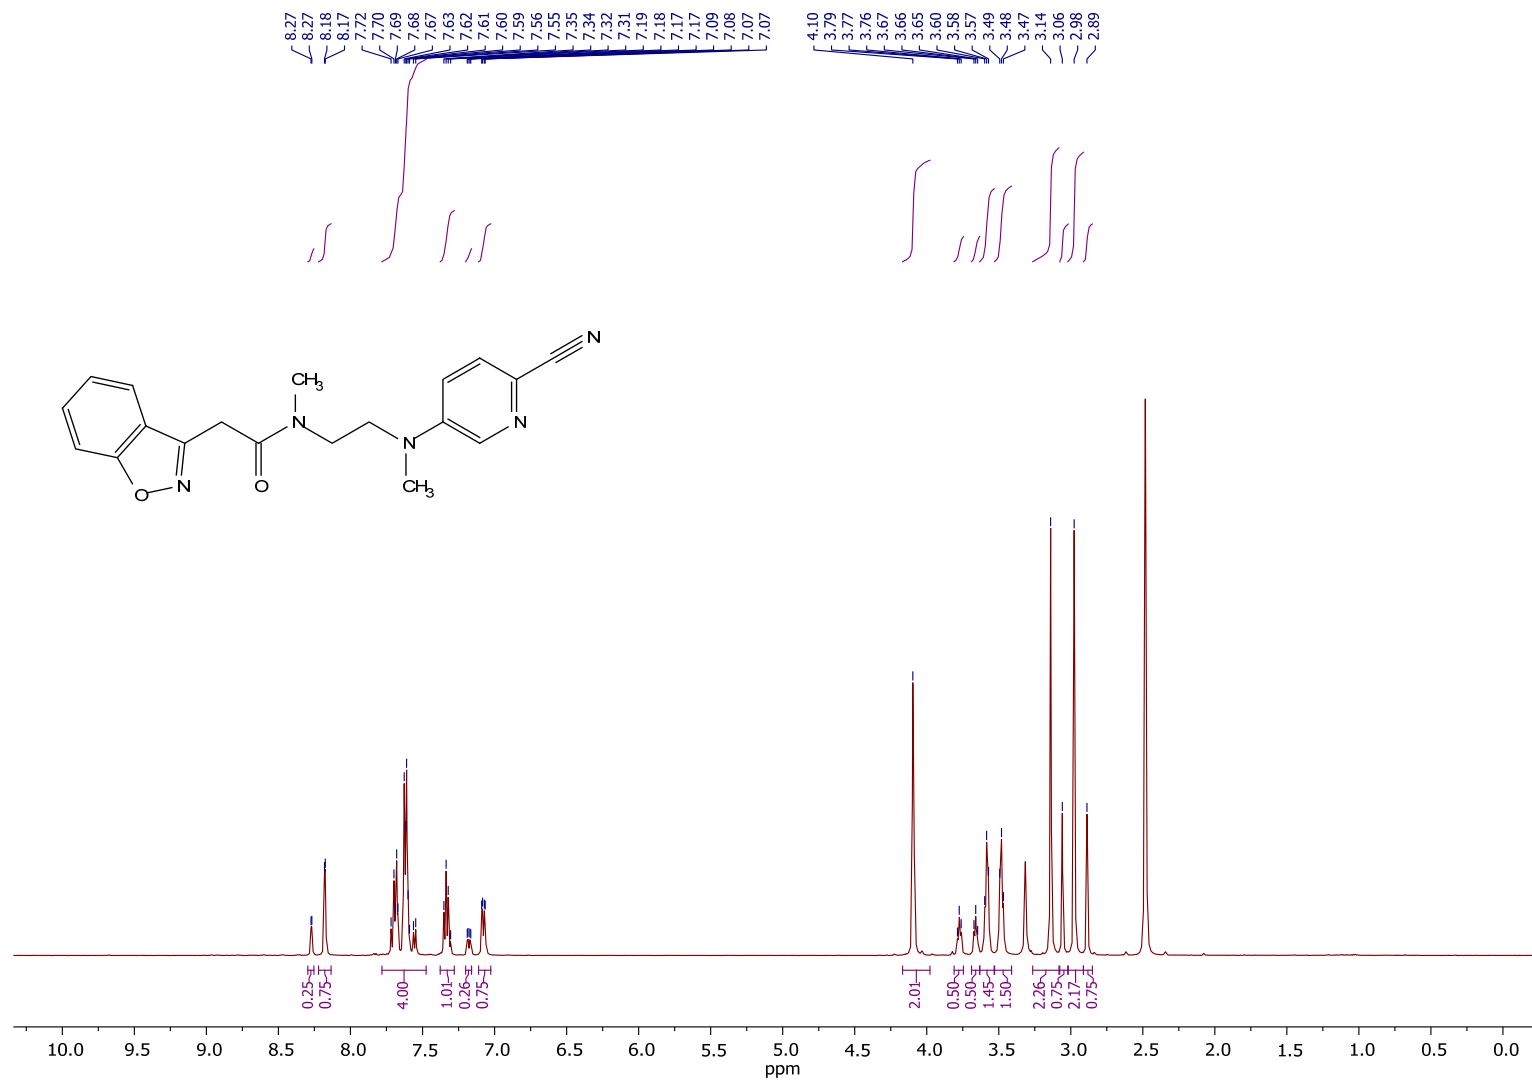

2-(Benzo[*d*]isoxazol-3-yl)-*N*-(2-((6-cyanopyridin-3-yl)(methyl)amino)ethyl)-*N*-methylacetamide (**12**<sub>{2,23,11}</sub>), <sup>1</sup>H NMR (500 MHz, DMSO-*d*<sub>6</sub>)

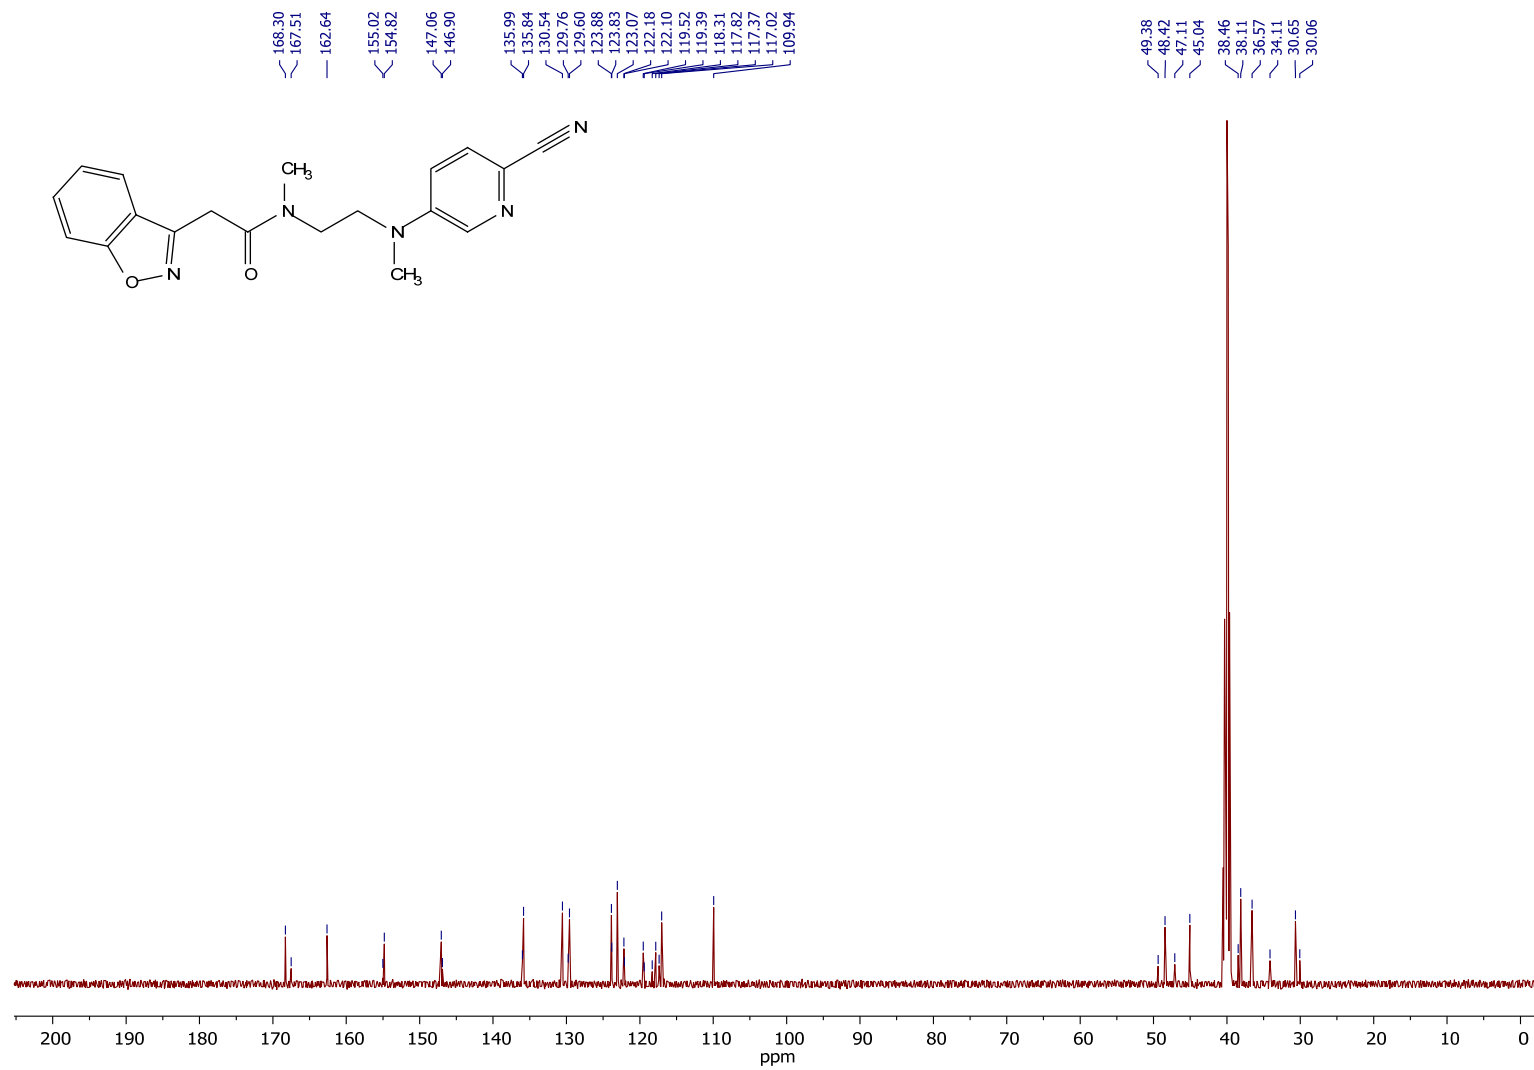

2-(Benzo[*d*]isoxazol-3-yl)-*N*-(2-((6-cyanopyridin-3-yl)(methyl)amino)ethyl)-*N*-methylacetamide (**12**{2,23,11}),  $^{13}\text{C}$  NMR (126 MHz, DMSO-*d*<sub>6</sub>)

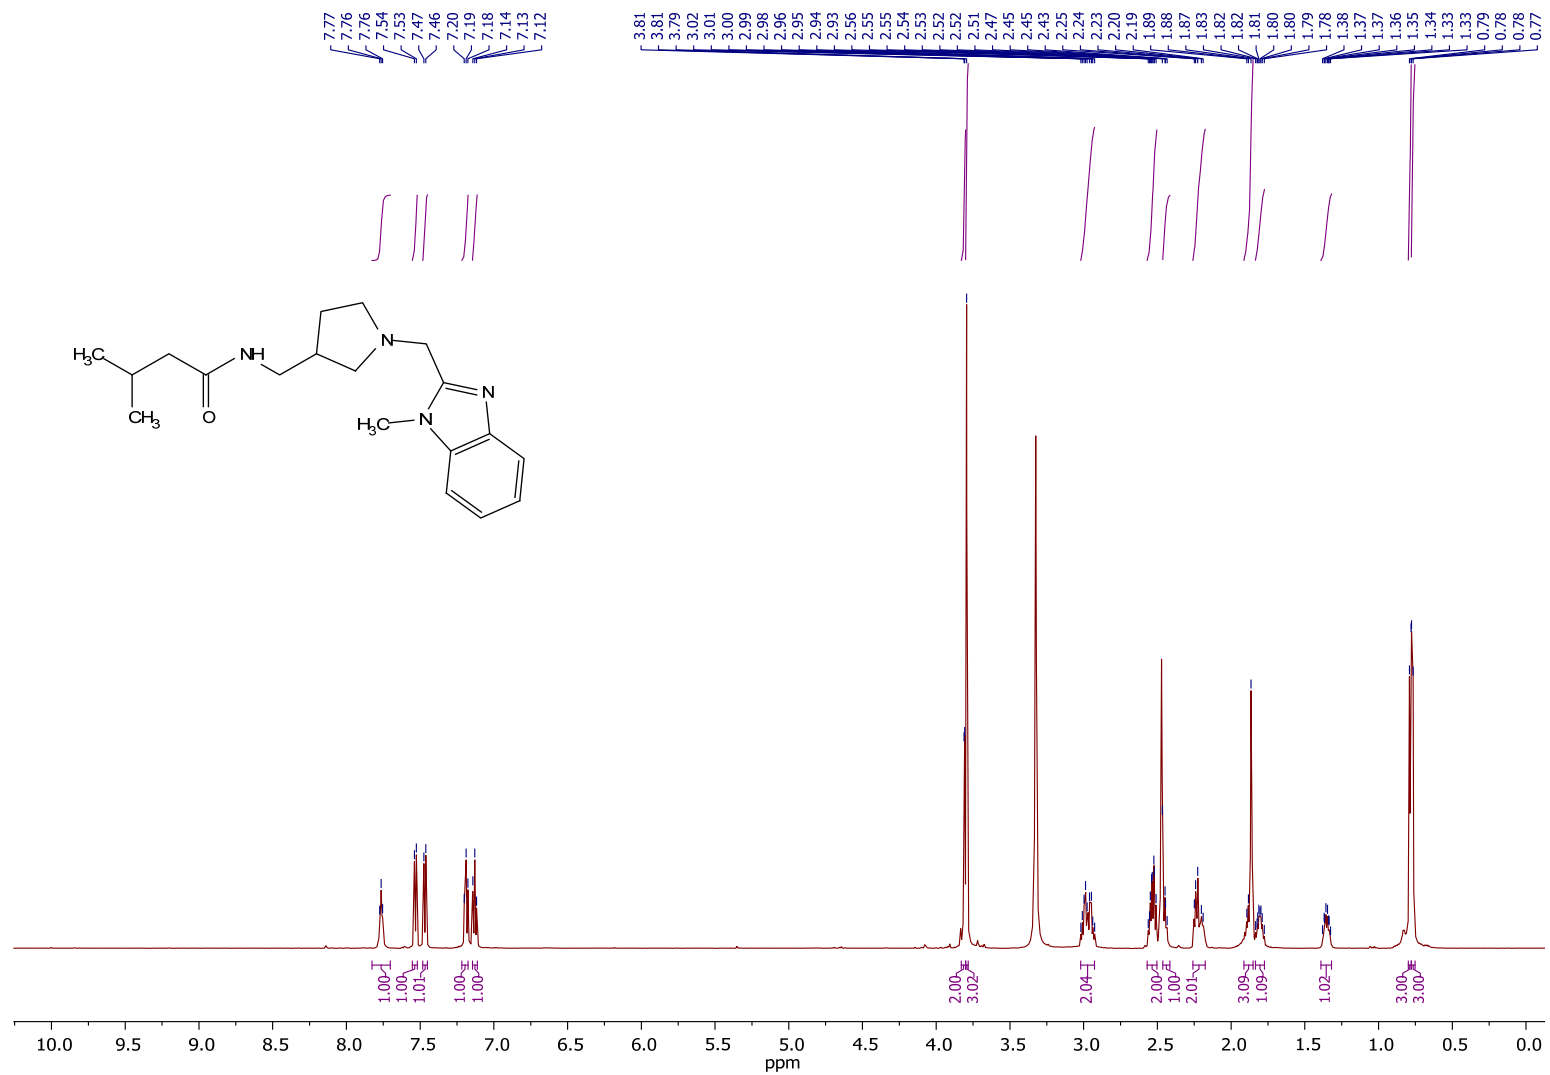

3-Methyl-N-((1-((1-methyl-1H-benzo[d]imidazol-2-yl)methyl)pyrrolidin-3-yl)methyl)butanamide (**13**{85,113,14}), <sup>1</sup>H NMR (600 MHz, DMSO-d<sub>6</sub>)

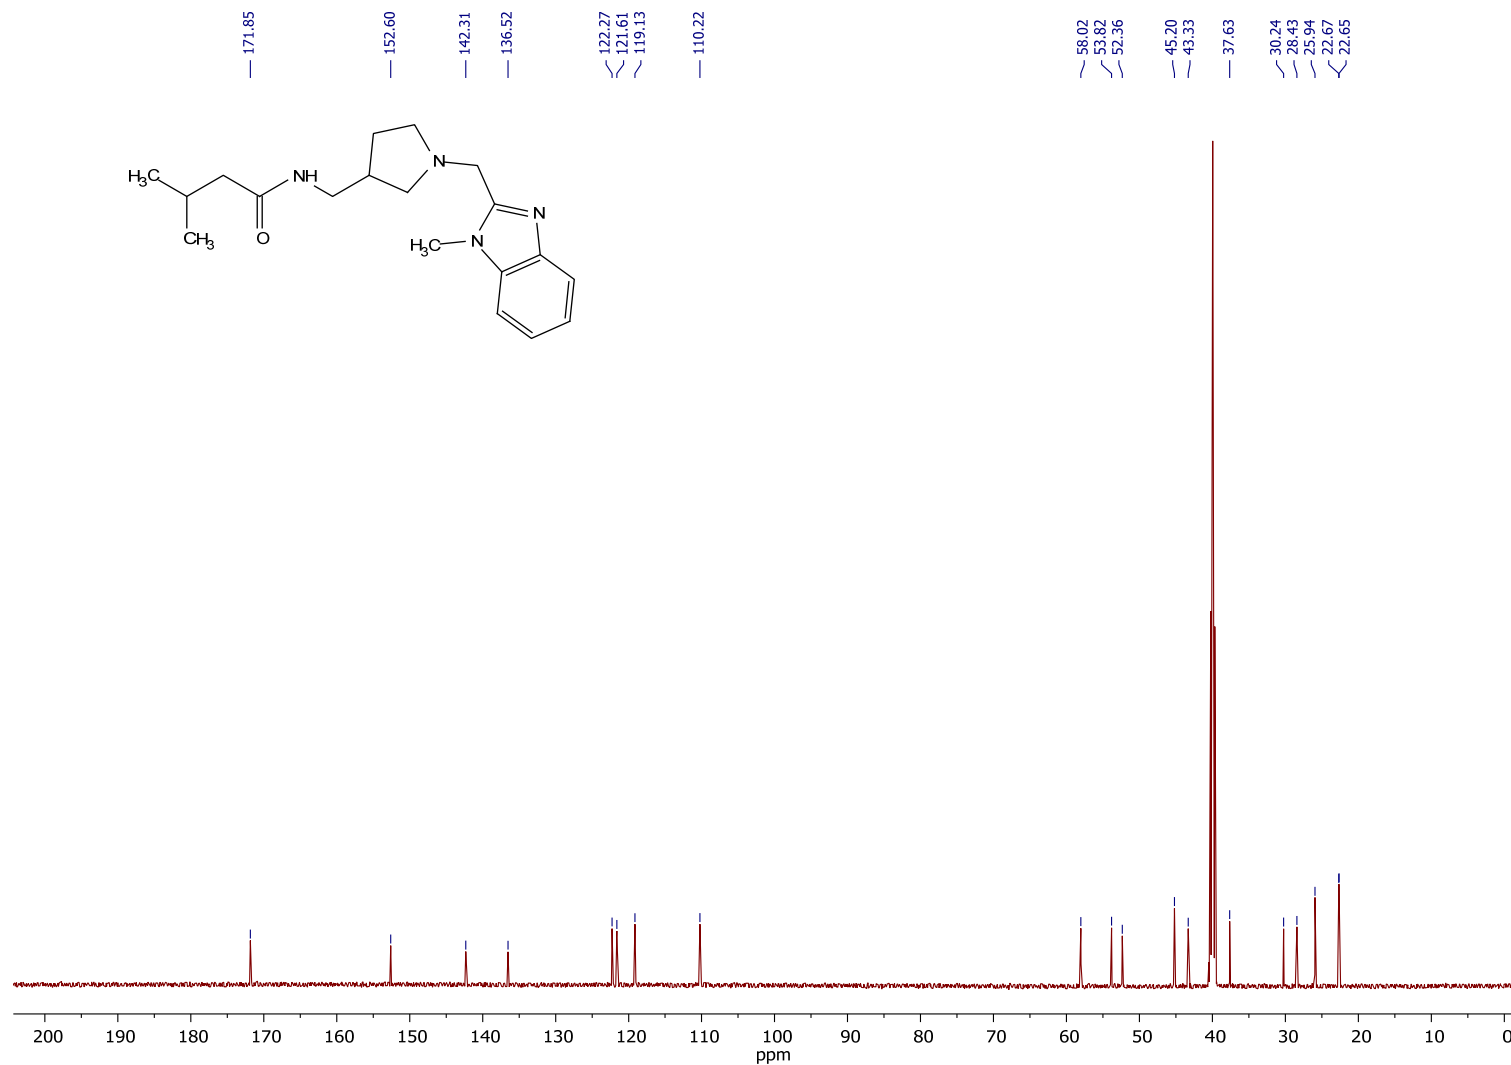

3-Methyl-N-((1-((1-methyl-1H-benzo[d]imidazol-2-yl)methyl)pyrrolidin-3-yl)methyl)butanamide (**13**{85,113,14}), <sup>13</sup>C NMR (151 MHz, DMSO-d<sub>6</sub>)

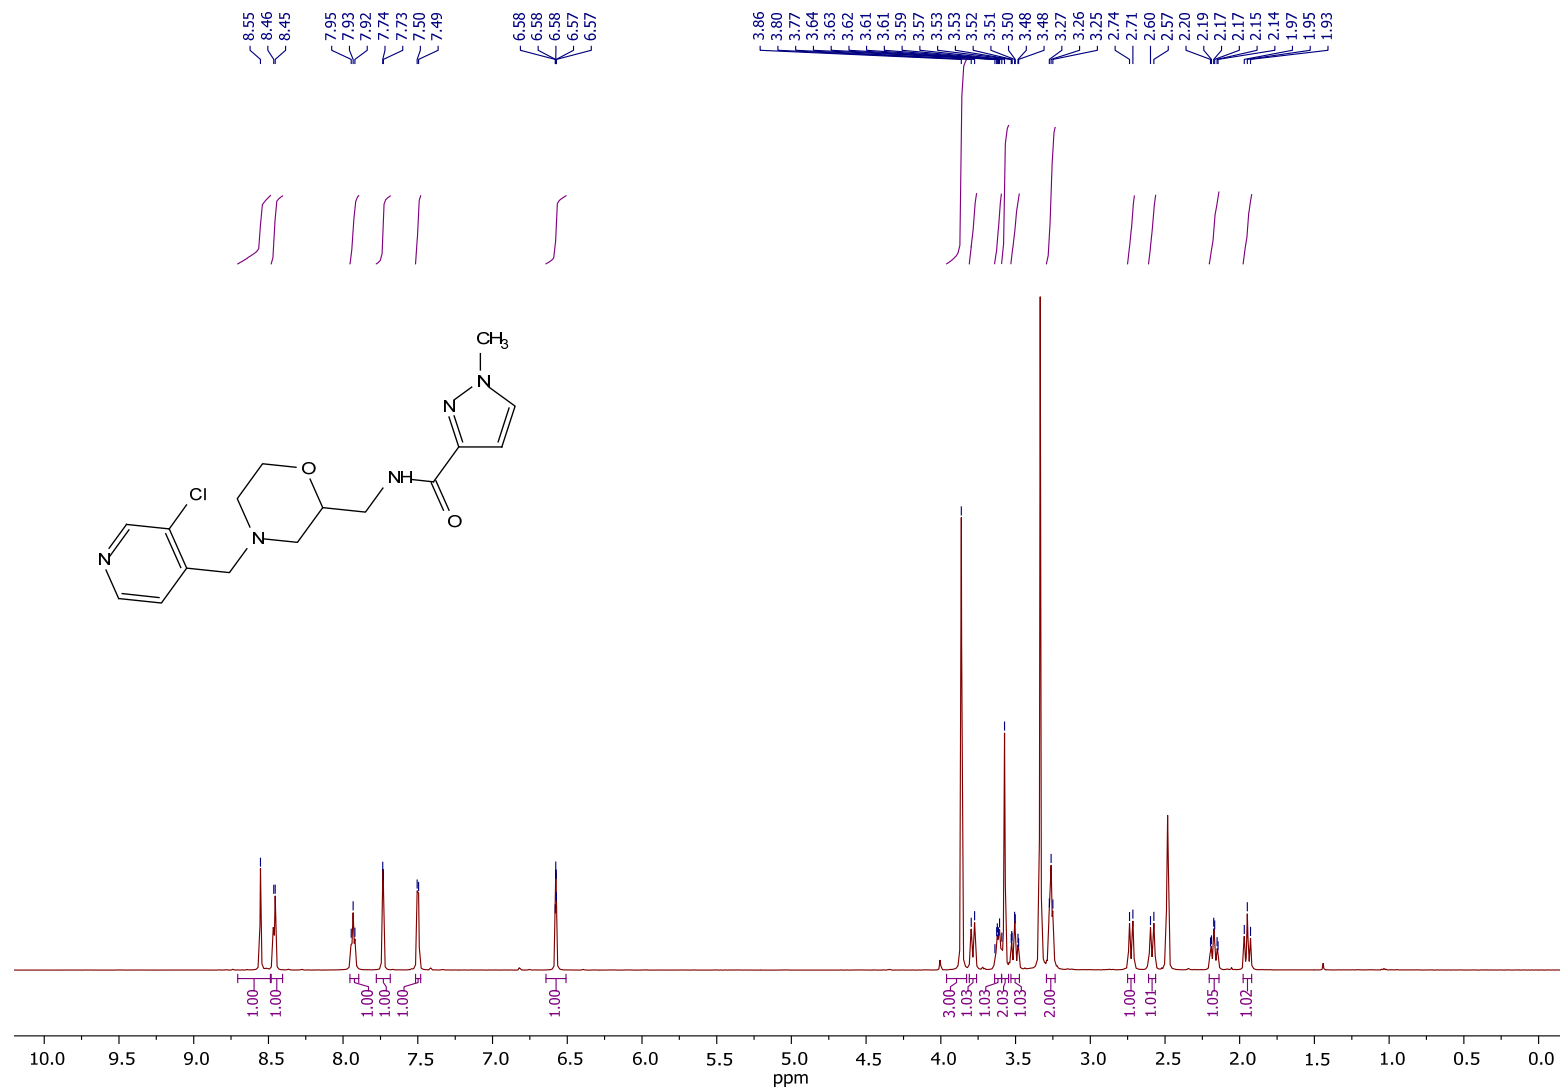

*N*-((4-((3-chloropyridin-4-yl)methyl)morpholin-2-yl)methyl)-1-methyl-1*H*-pyrazole-3-carboxamide (**13{74,107,20}**), <sup>1</sup>H NMR (500 MHz, DMSO-*d*<sub>6</sub>)

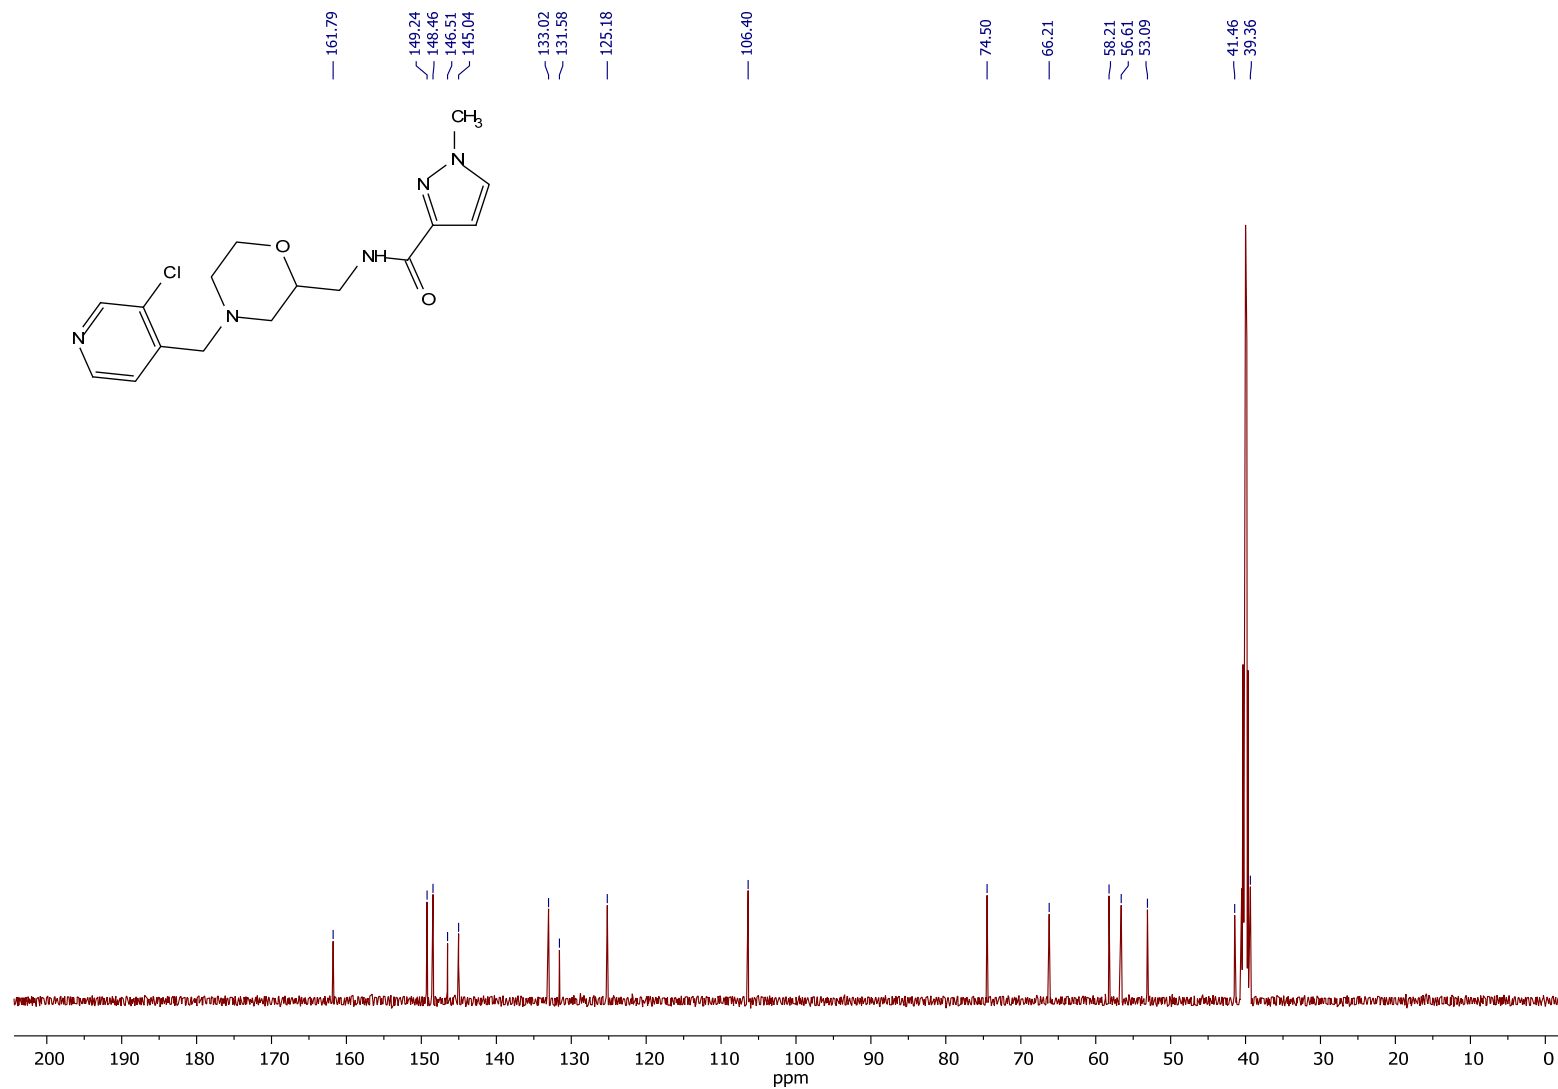

*N*-((4-((3-Chloropyridin-4-yl)methyl)morpholin-2-yl)methyl)-1-methyl-1*H*-pyrazole-3-carboxamide (**13**{74,107,20}),  
<sup>13</sup>C NMR (126 MHz, DMSO-*d*<sub>6</sub>)



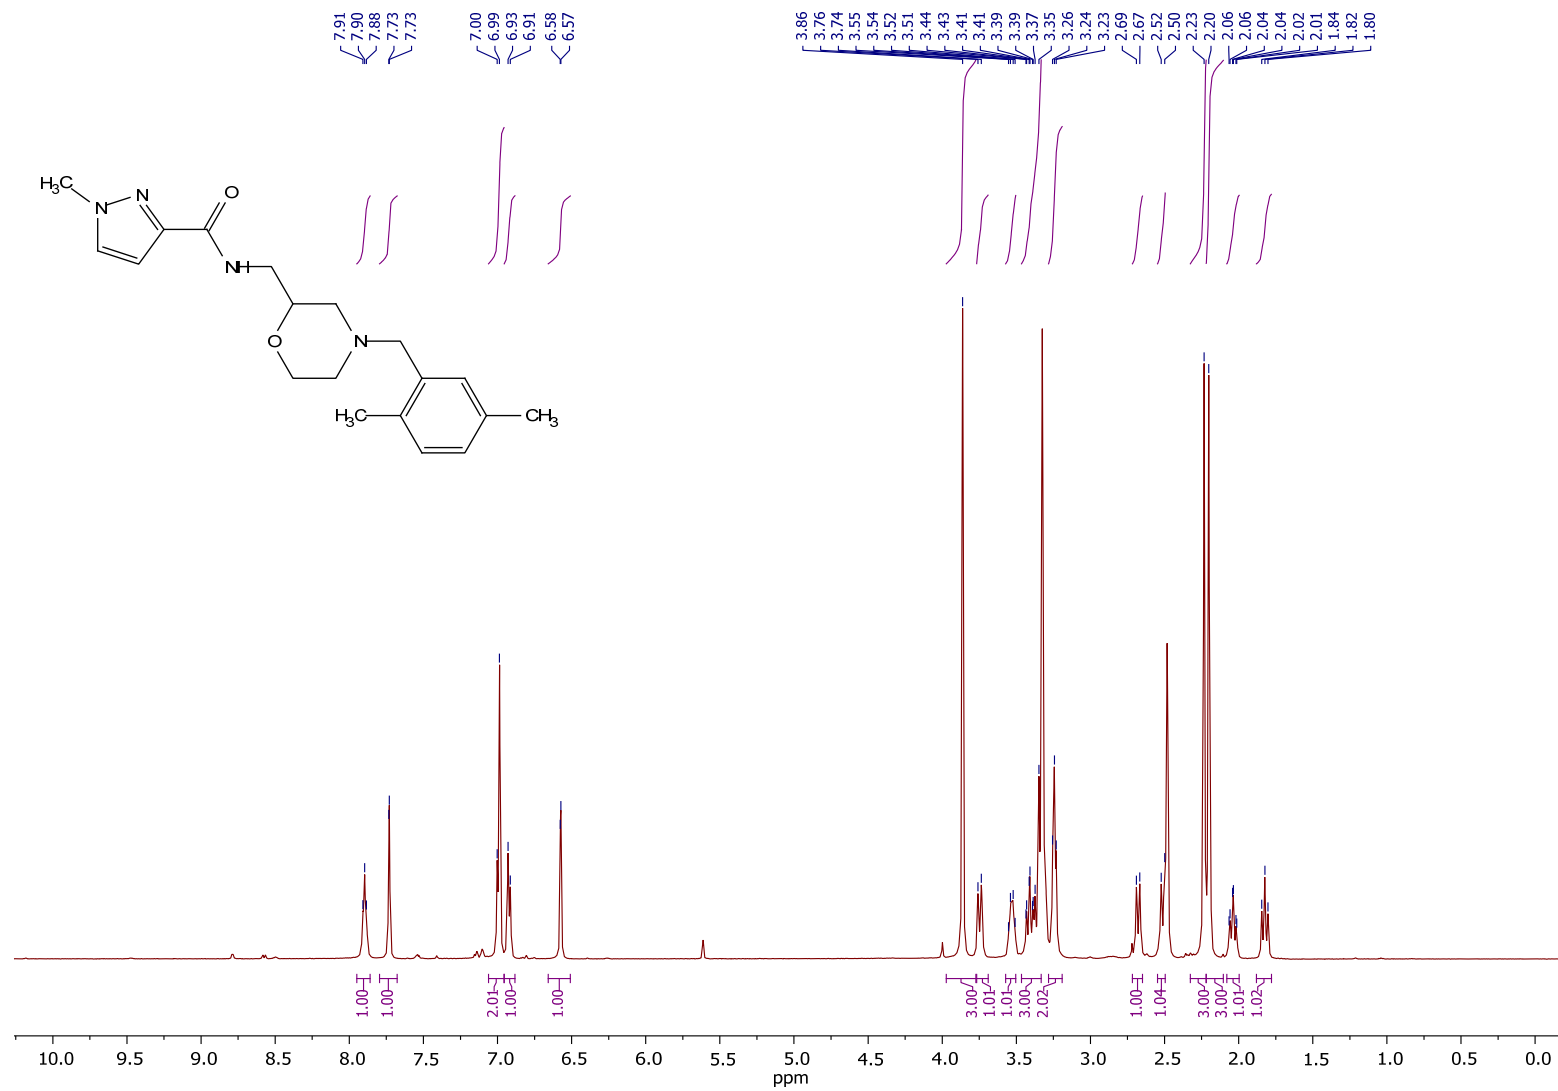

*N*-((4-(2,5-Dimethylbenzyl)morpholin-2-yl)methyl)-1-methyl-1*H*-pyrazole-3-carboxamide (**13{74,107,21}**), <sup>1</sup>H NMR (500 MHz, DMSO-*d*<sub>6</sub>)

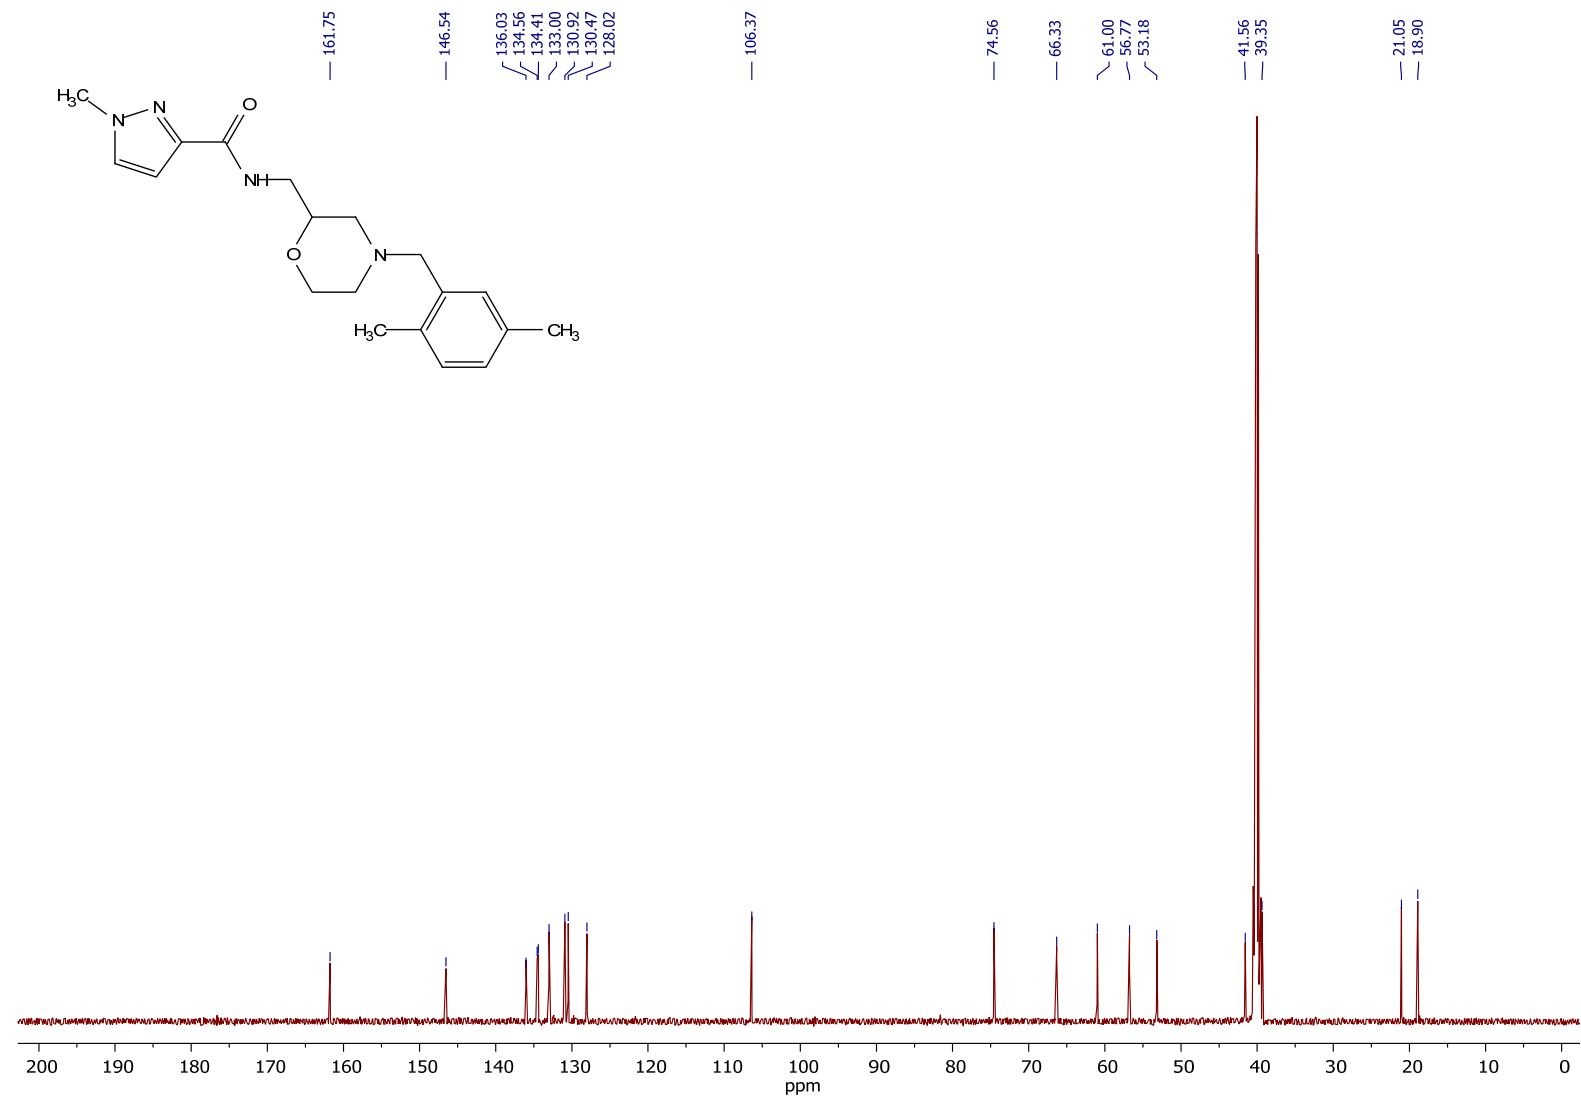

*N*-((4-(2,5-Dimethylbenzyl)morpholin-2-yl)methyl)-1-methyl-1*H*-pyrazole-3-carboxamide (**13**{74,107,21}), <sup>13</sup>C NMR (126 MHz, DMSO-*d*<sub>6</sub>)

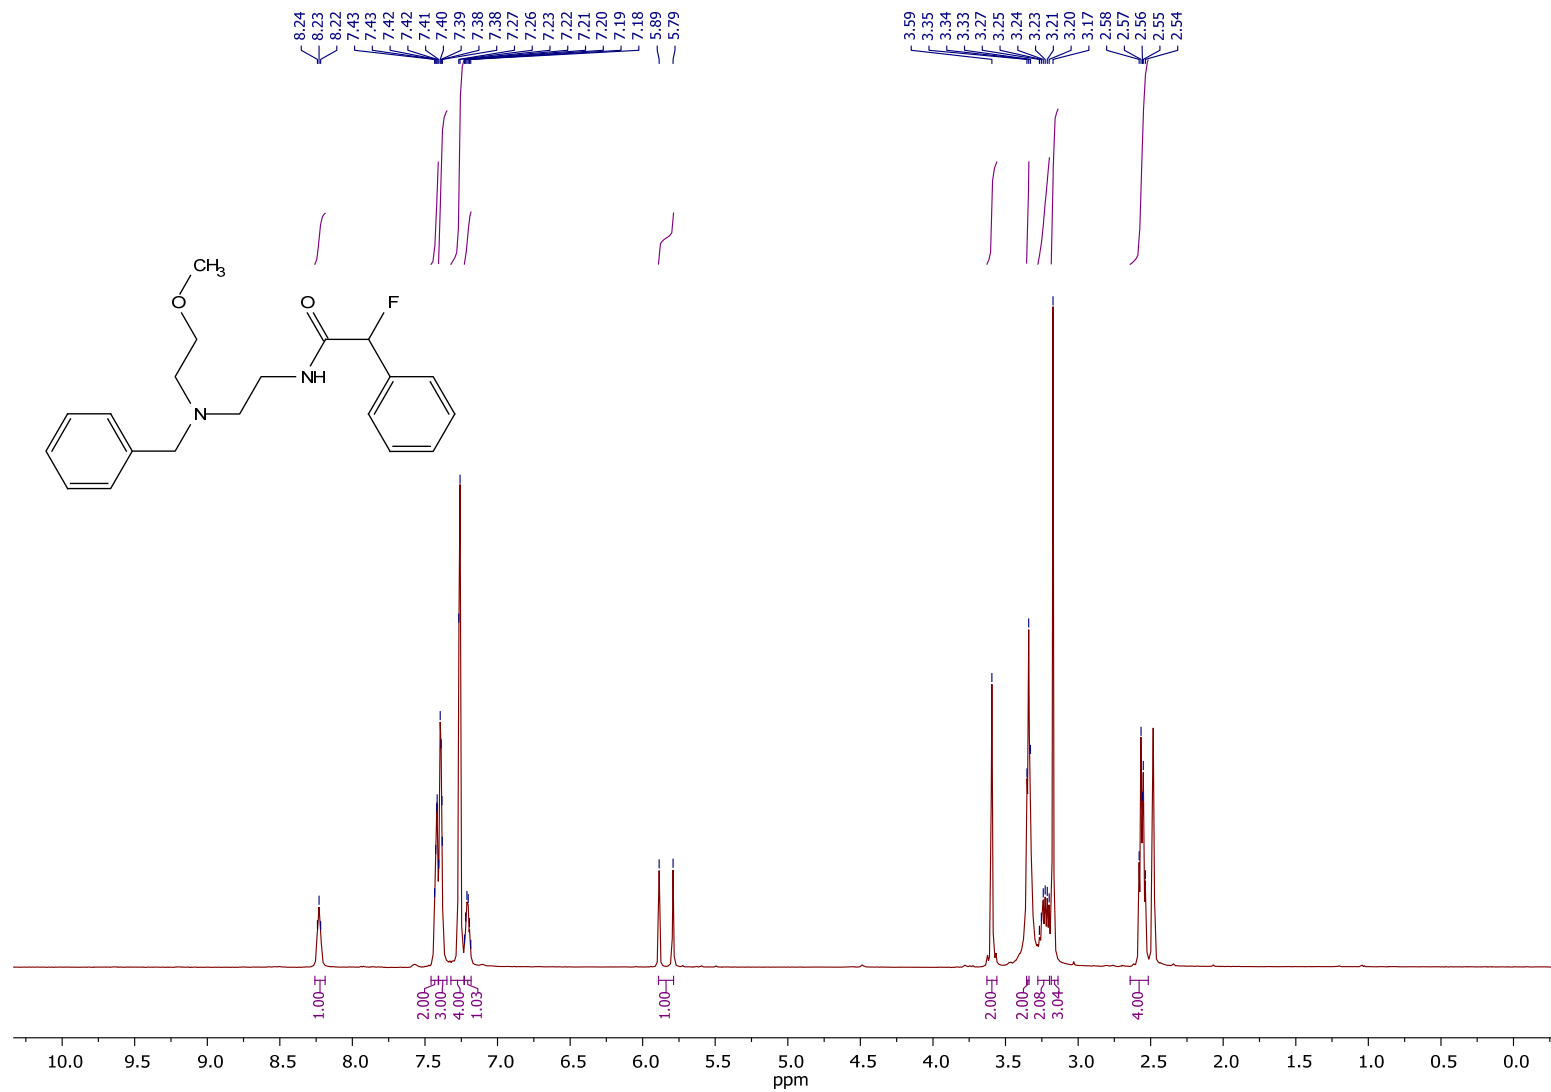

*N*-(2-(benzyl(2-methoxyethyl)amino)ethyl)-2-fluoro-2-phenylacetamide (**13**{107,152,23}), <sup>1</sup>H NMR (500 MHz, DMSO-*d*<sub>6</sub>)

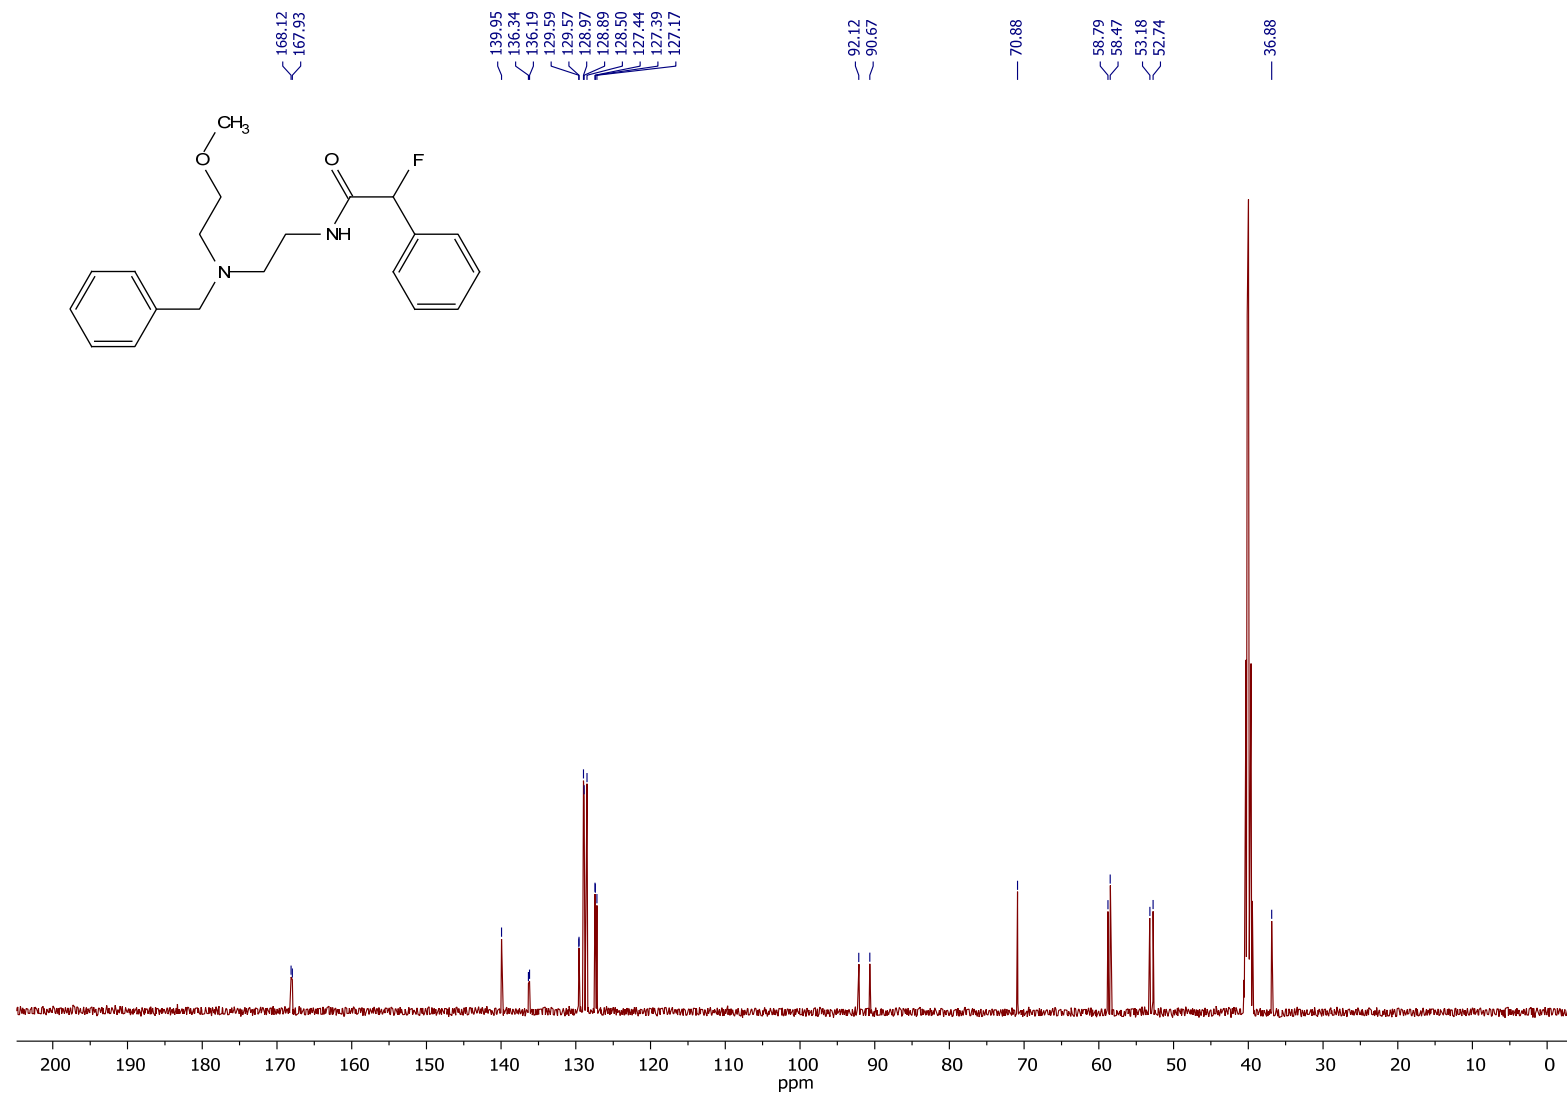

*N*-(2-(benzyl(2-methoxyethyl)amino)ethyl)-2-fluoro-2-phenylacetamide (**13**{107,152,23}), <sup>13</sup>C NMR (126 MHz, DMSO-*d*<sub>6</sub>)

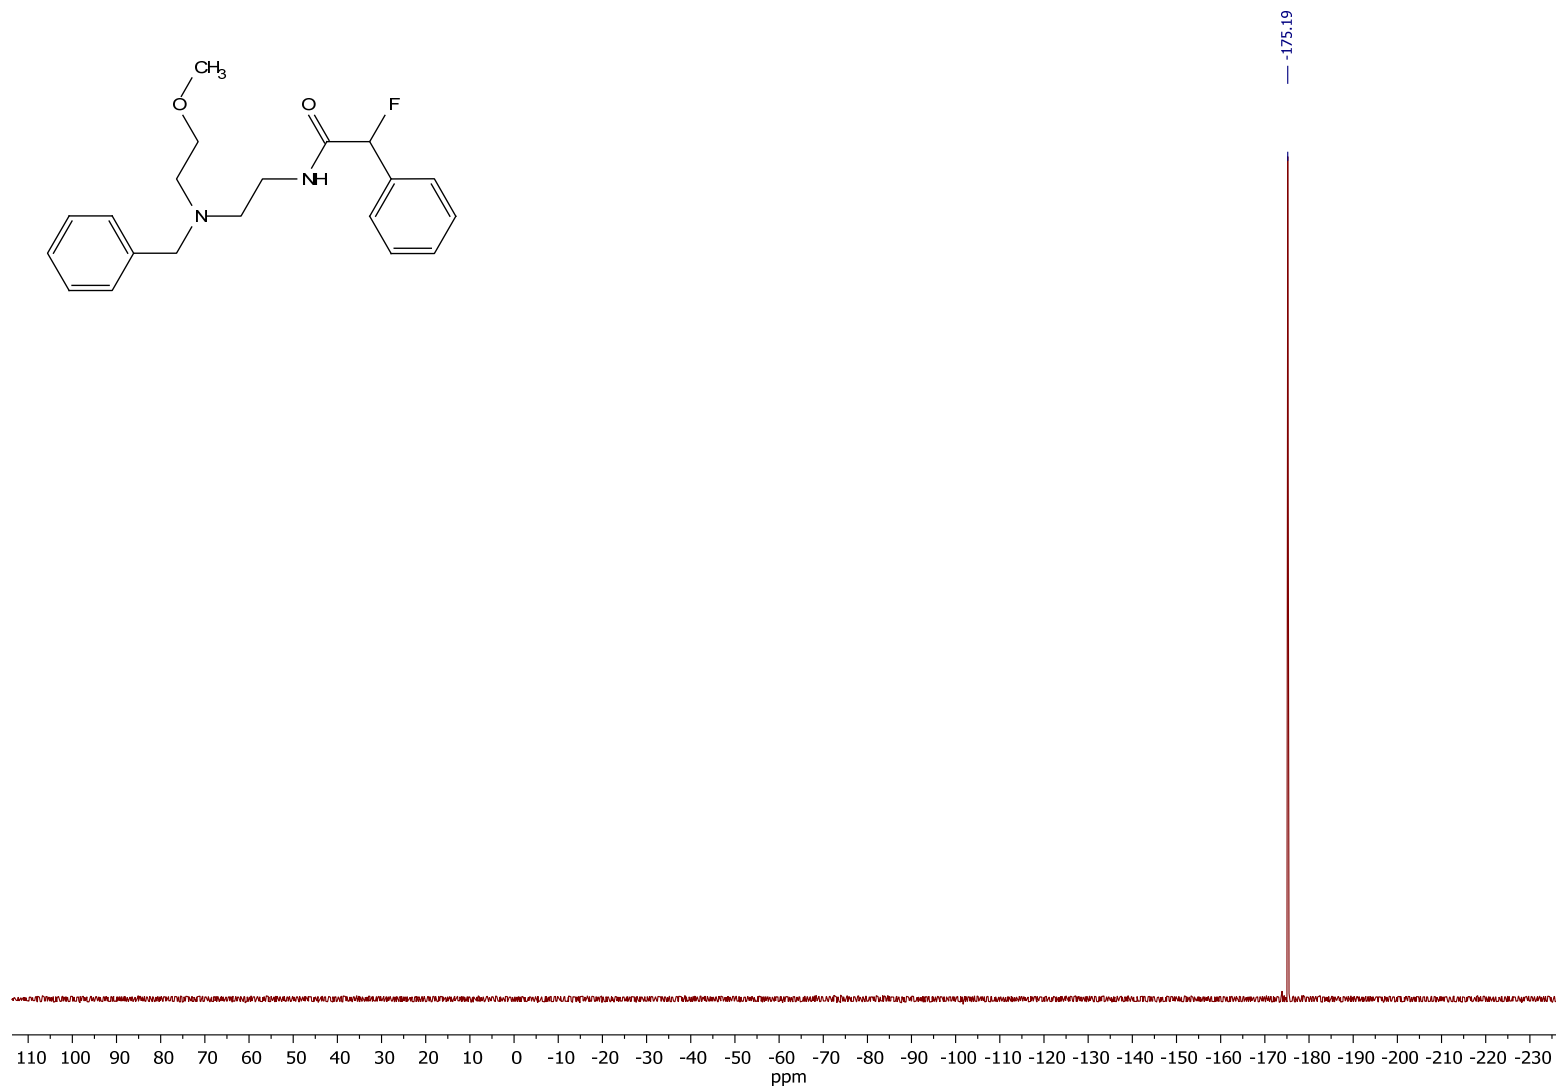

*N*-(2-(benzyl(2-methoxyethyl)amino)ethyl)-2-fluoro-2-phenylacetamide (**13**{107,152,23}),  $^{19}\text{F}$  NMR (376 MHz, DMSO- $d_6$ )

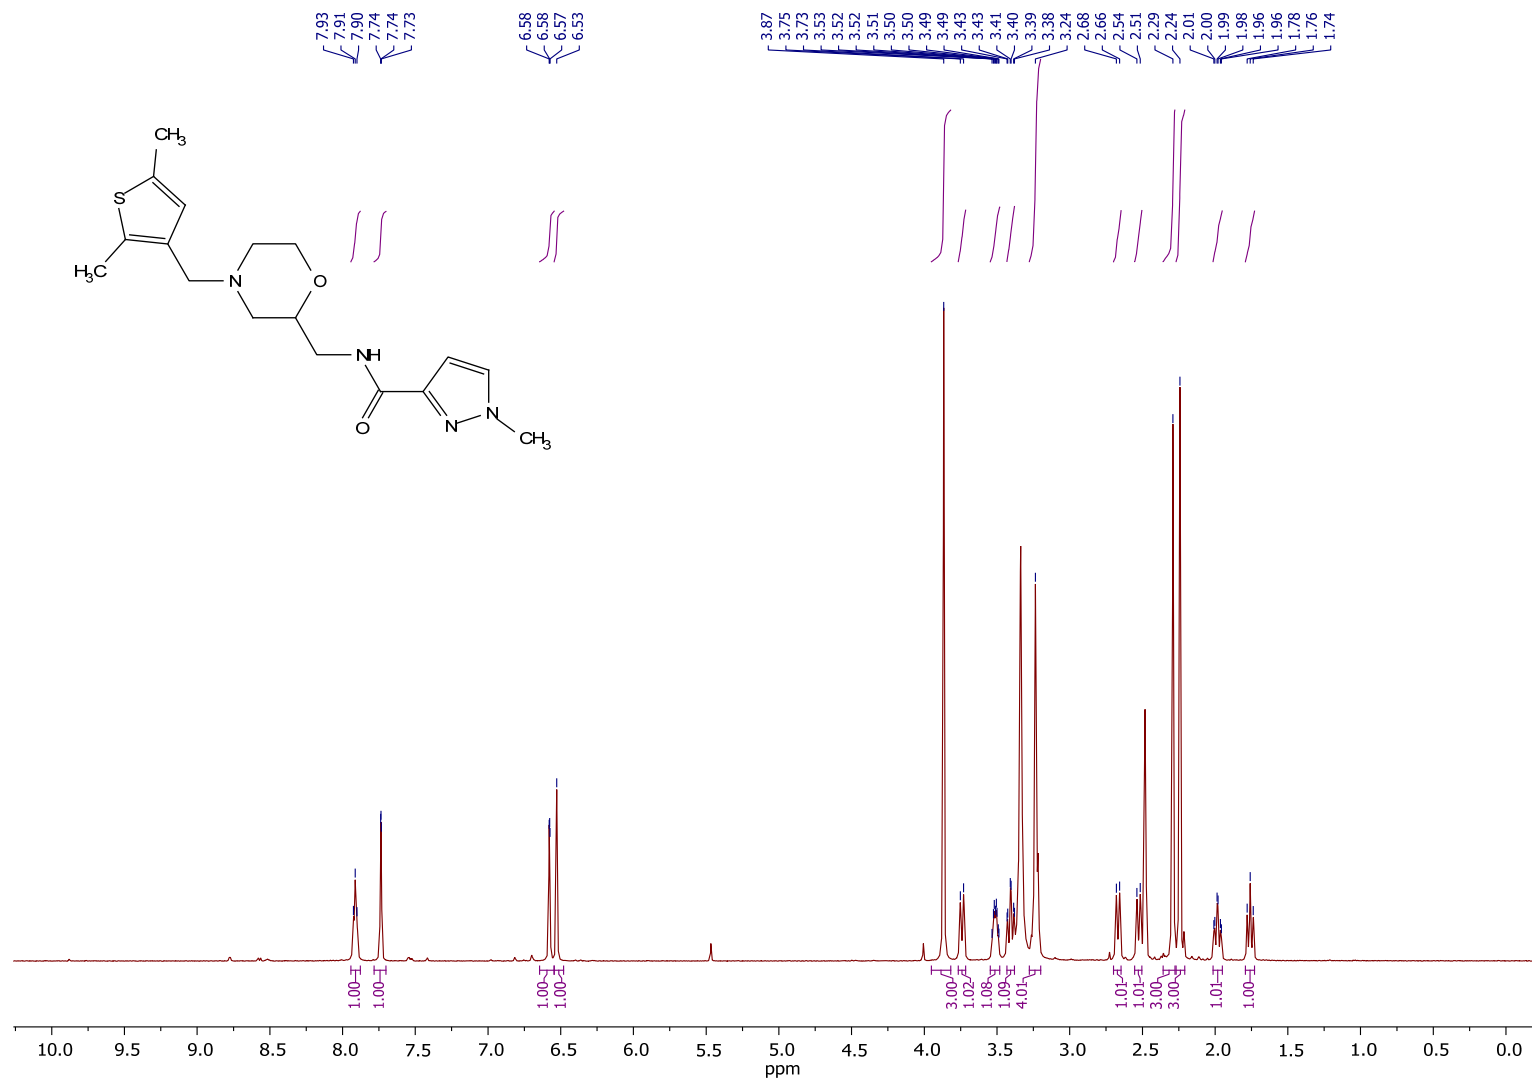

*N*-((4-((2,5-Dimethylthiophen-3-yl)methyl)morpholin-2-yl)methyl)-1-methyl-1*H*-pyrazole-3-carboxamide (**13**{74,107,27}),  
<sup>1</sup>H NMR (500 MHz, DMSO-*d*<sub>6</sub>)

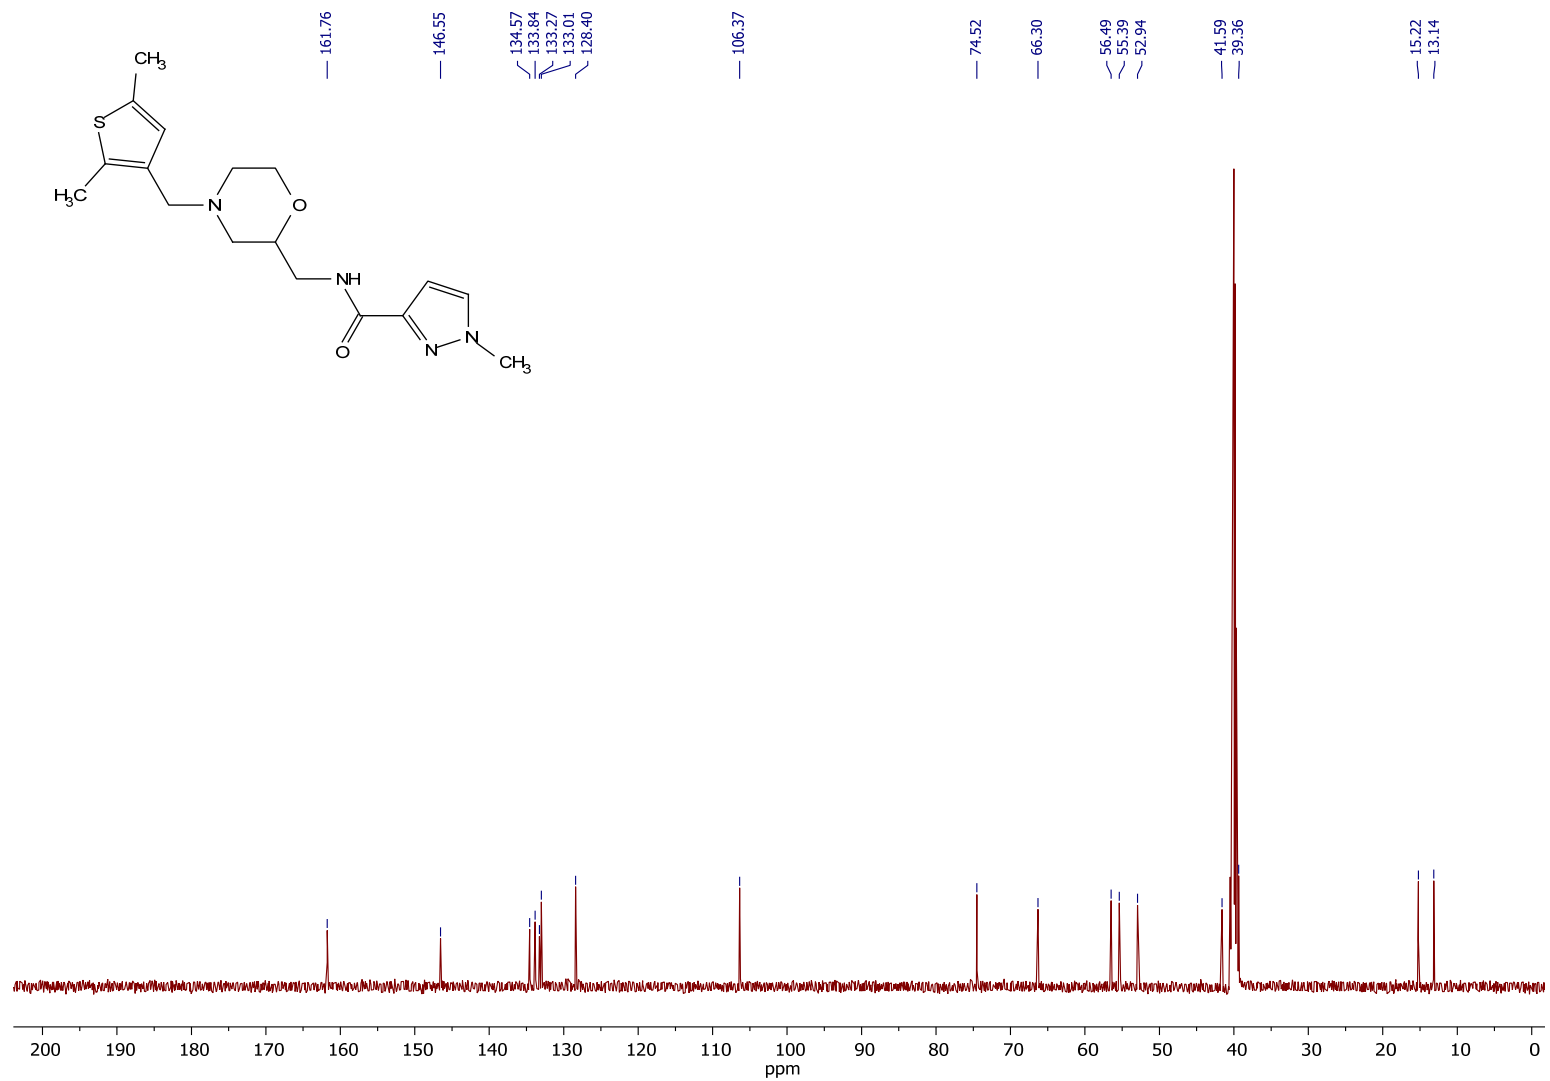

*N*-((4-((2,5-Dimethylthiophen-3-yl)methyl)morpholin-2-yl)methyl)-1-methyl-1*H*-pyrazole-3-carboxamide (**13**<sub>{74,107,27}</sub>),  
<sup>13</sup>C NMR (126 MHz, DMSO-*d*<sub>6</sub>)

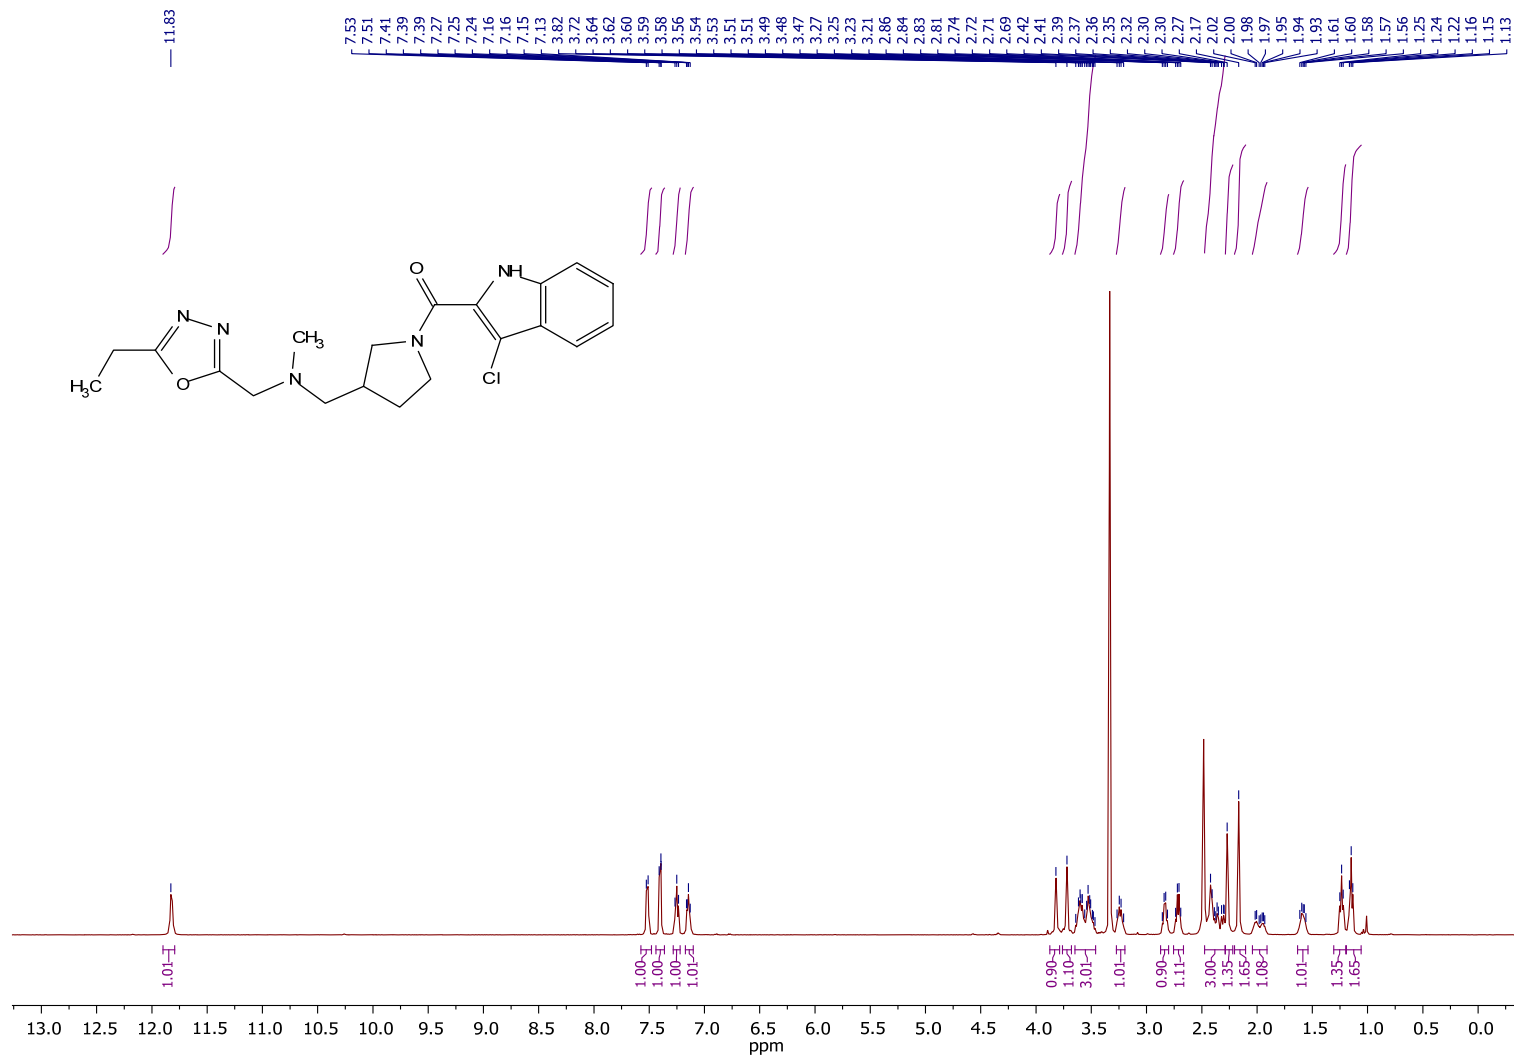

(3-Chloro-1*H*-indol-2-yl)(3-(((5-ethyl-1,3,4-oxadiazol-2-yl)methyl)(methyl)amino)methyl)pyrrolidin-1-yl)methanone (**13**{44,129,33}),  
<sup>1</sup>H NMR (500 MHz, DMSO-*d*<sub>6</sub>)



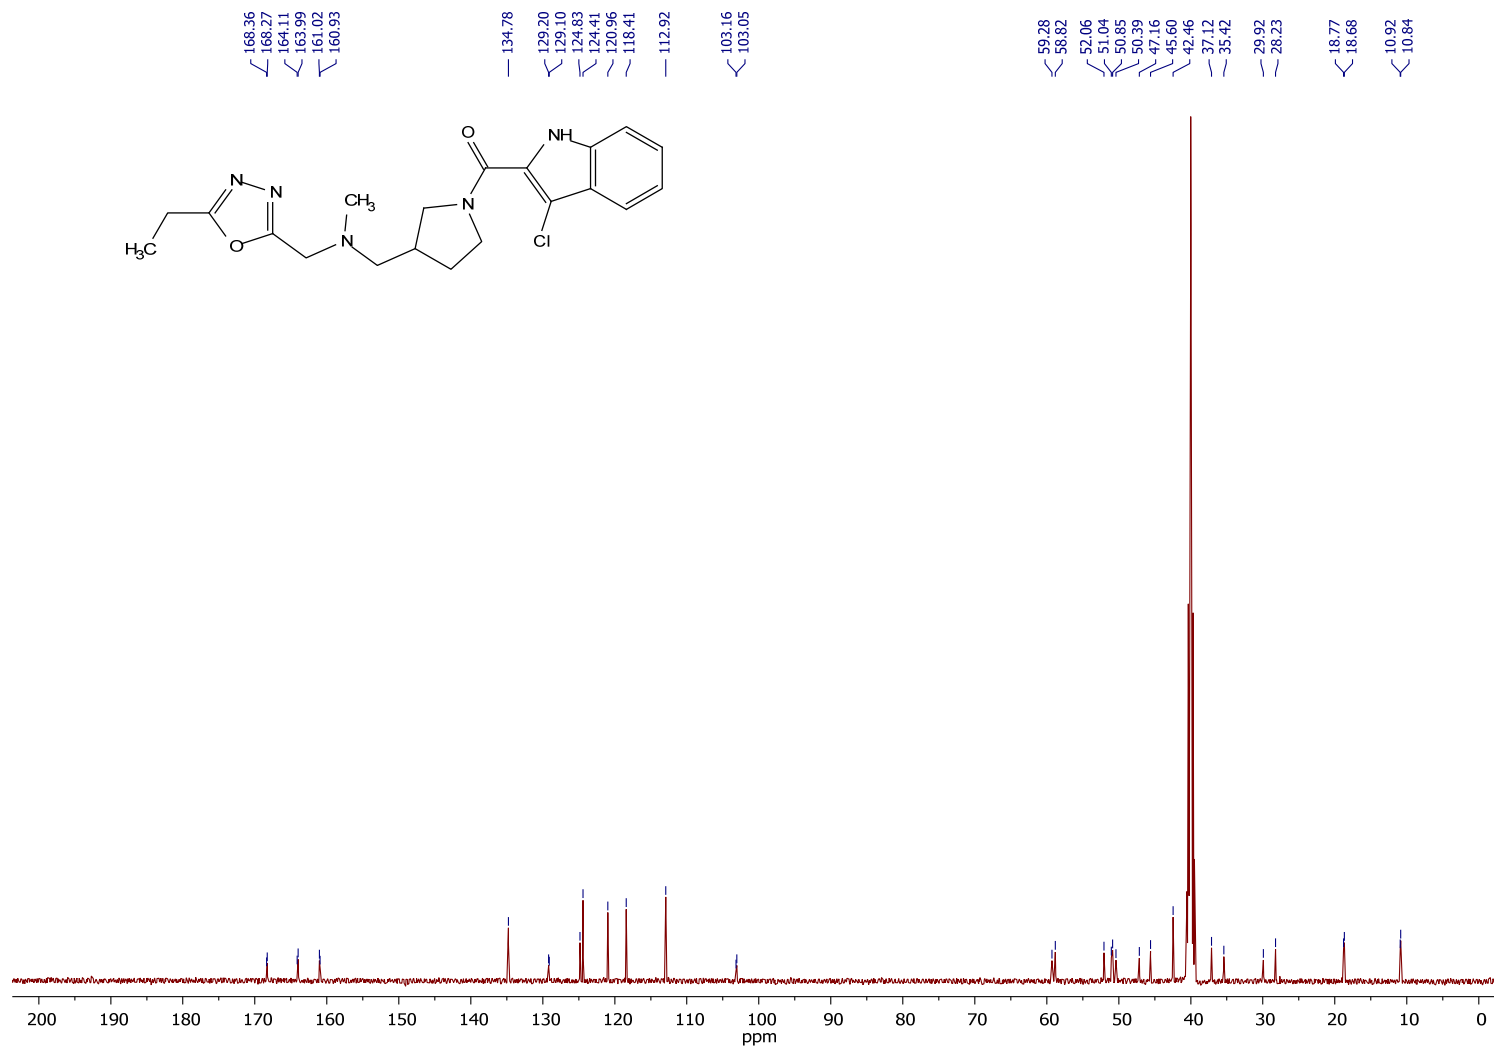

(3-Chloro-1H-indol-2-yl)(3-(((5-ethyl-1,3,4-oxadiazol-2-yl)methyl)(methyl)amino)methyl)pyrrolidin-1-yl)methanone (**13** {44,129,33}),  
<sup>13</sup>C NMR (126 MHz, DMSO-*d*<sub>6</sub>)

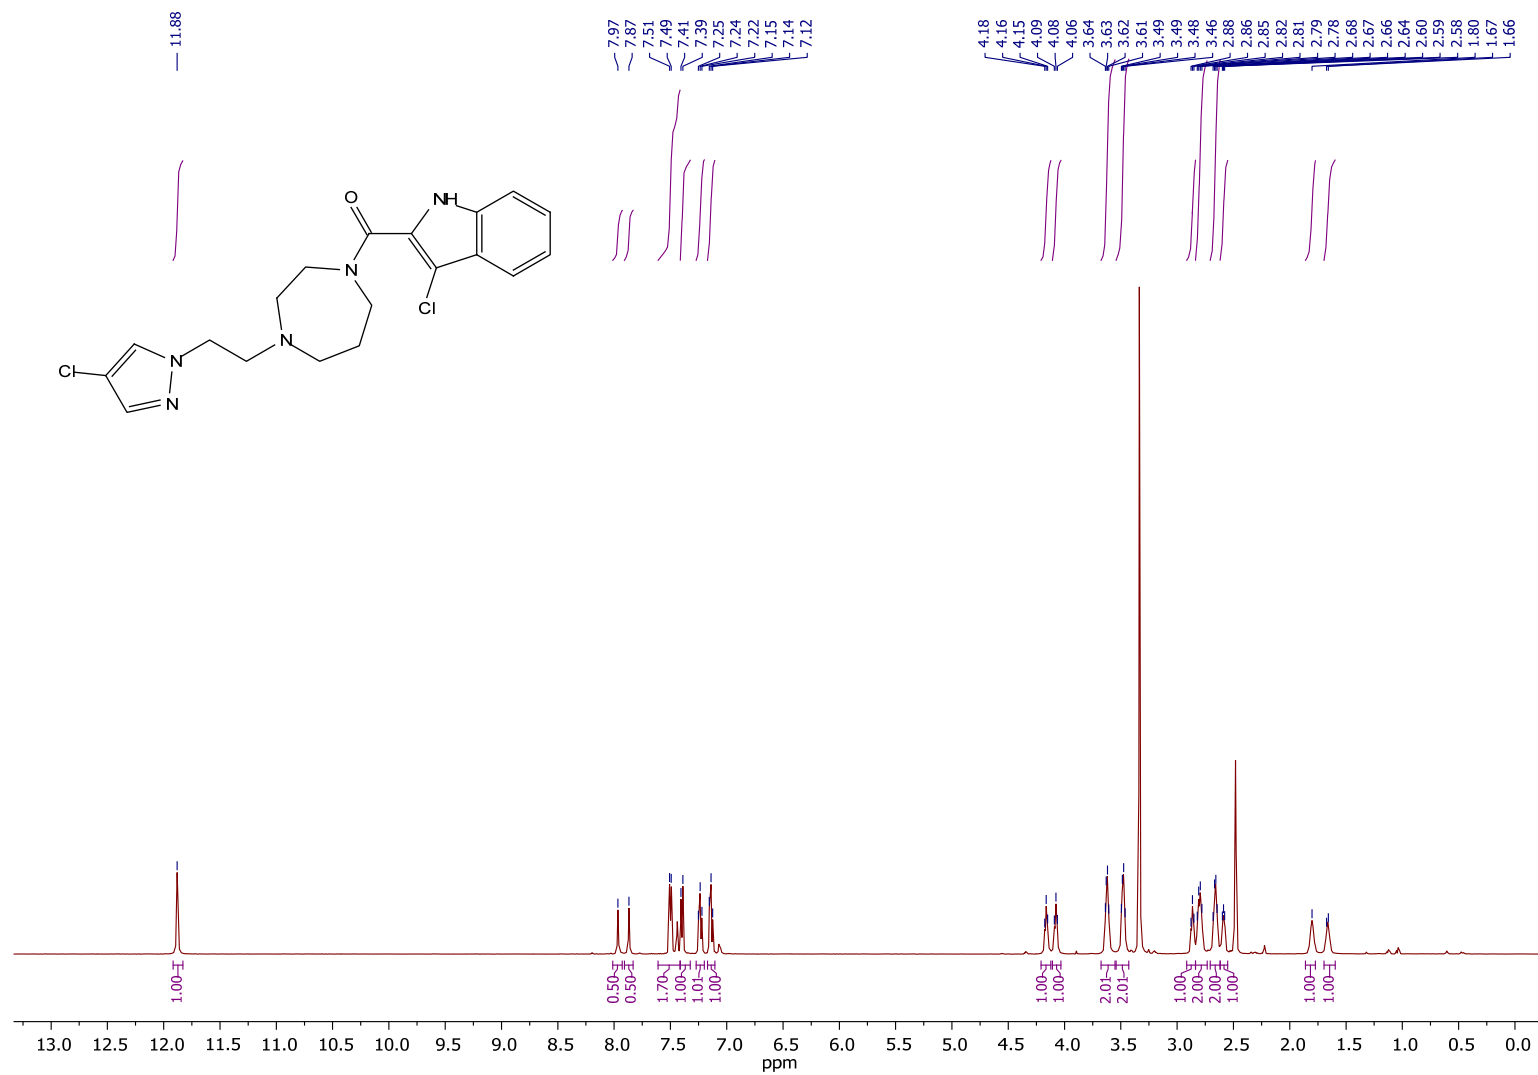

(3-Chloro-1*H*-indol-2-yl)(4-(2-(4-chloro-1*H*-pyrazol-1-yl)ethyl)-1,4-diazepan-1-yl)methanone (**13**{23,129,34}), <sup>1</sup>H NMR (500 MHz, DMSO-*d*<sub>6</sub>)

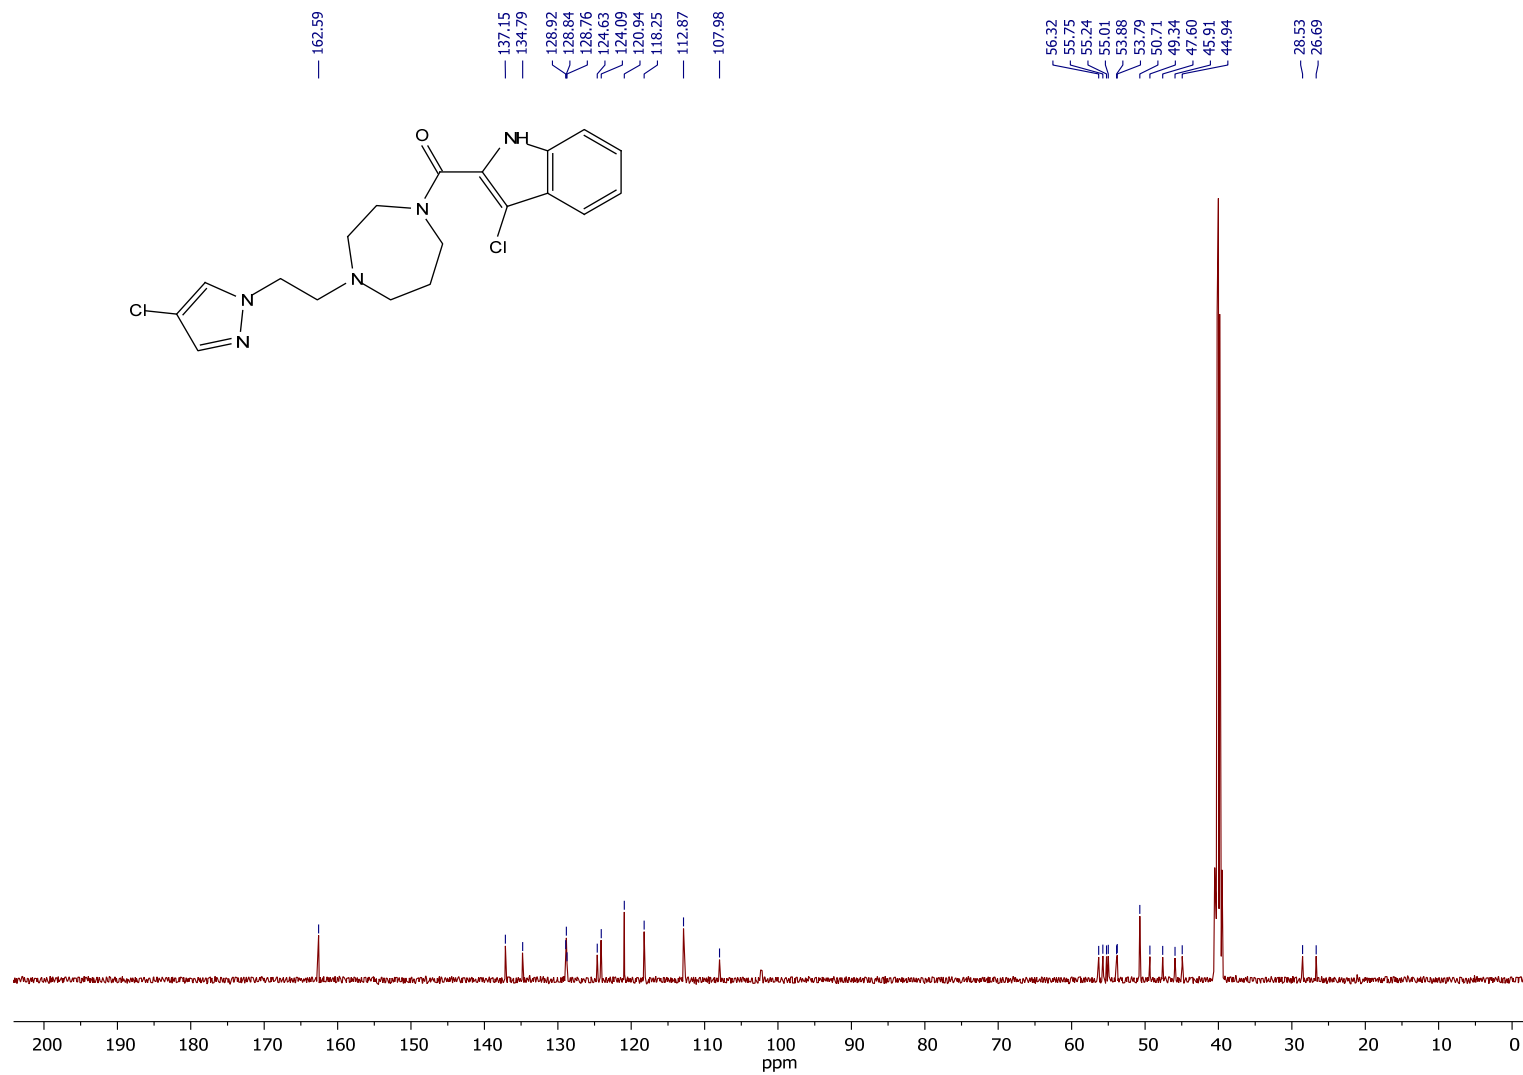

(3-Chloro-1H-indol-2-yl)(4-(2-(4-chloro-1H-pyrazol-1-yl)ethyl)-1,4-diazepan-1-yl)methanone (**13** {23,129,34}),  $^{13}\text{C}$  NMR (126 MHz, DMSO- $d_6$ )

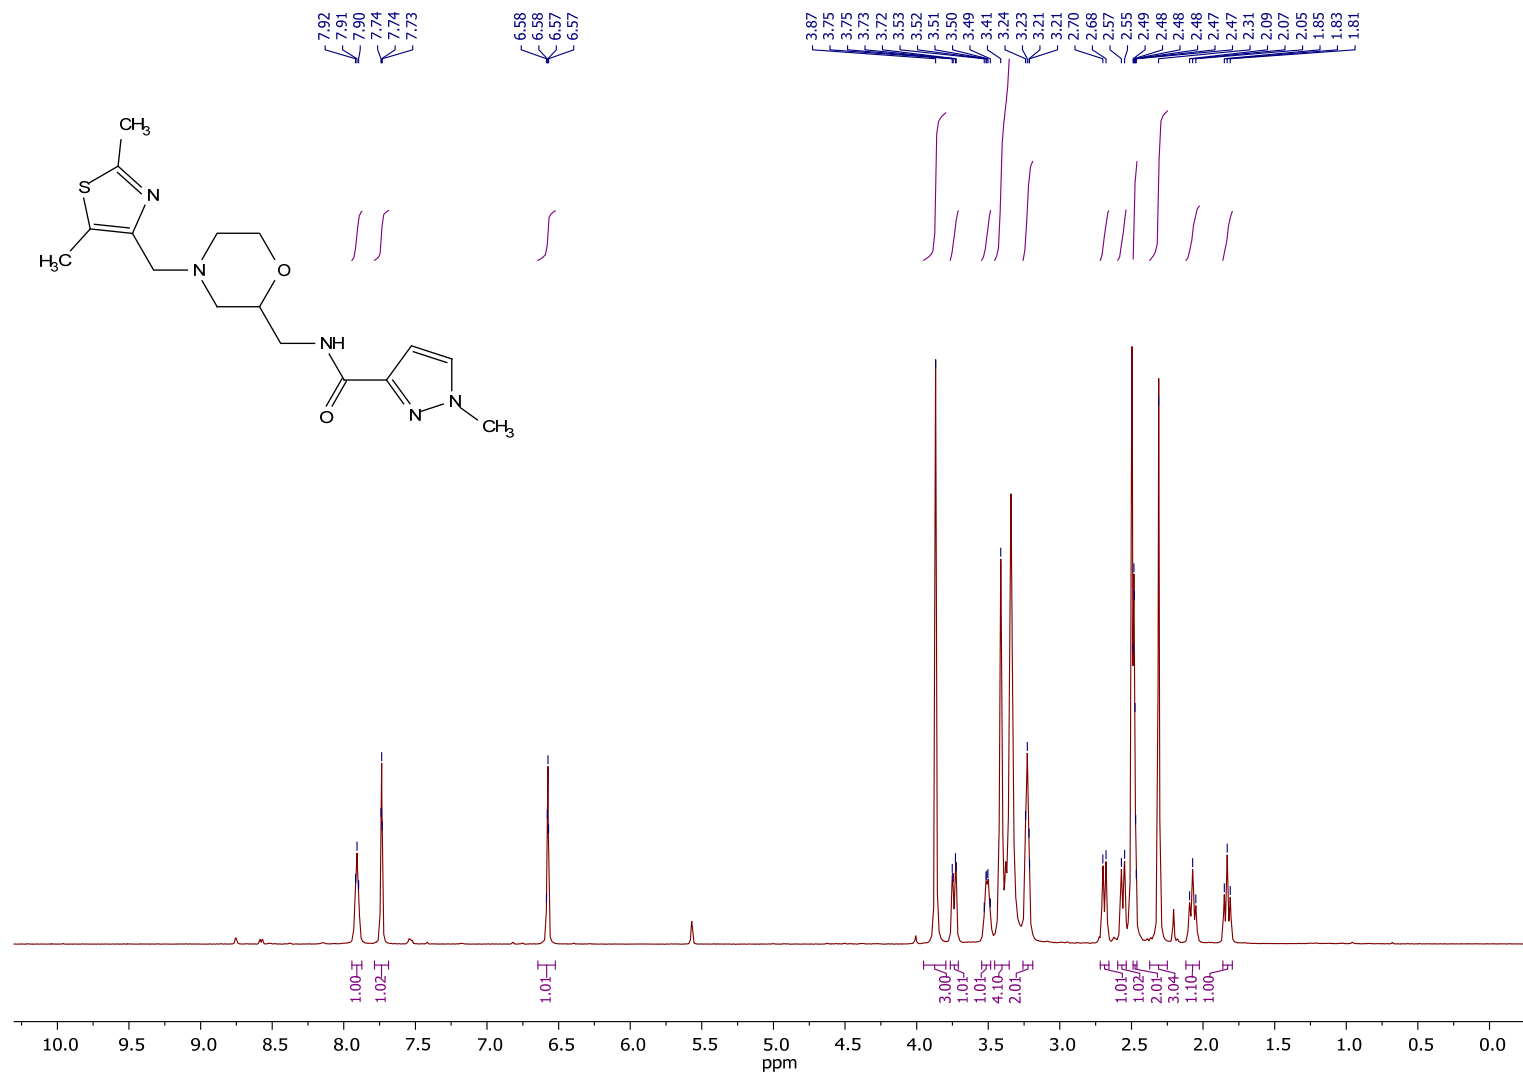

*N*-((4-((2,5-Dimethylthiazol-4-yl)methyl)morpholin-2-yl)methyl)-1-methyl-1H-pyrazole-3-carboxamide (**13**{74,107,35}),  
<sup>1</sup>H NMR (500 MHz, DMSO-*d*<sub>6</sub>)

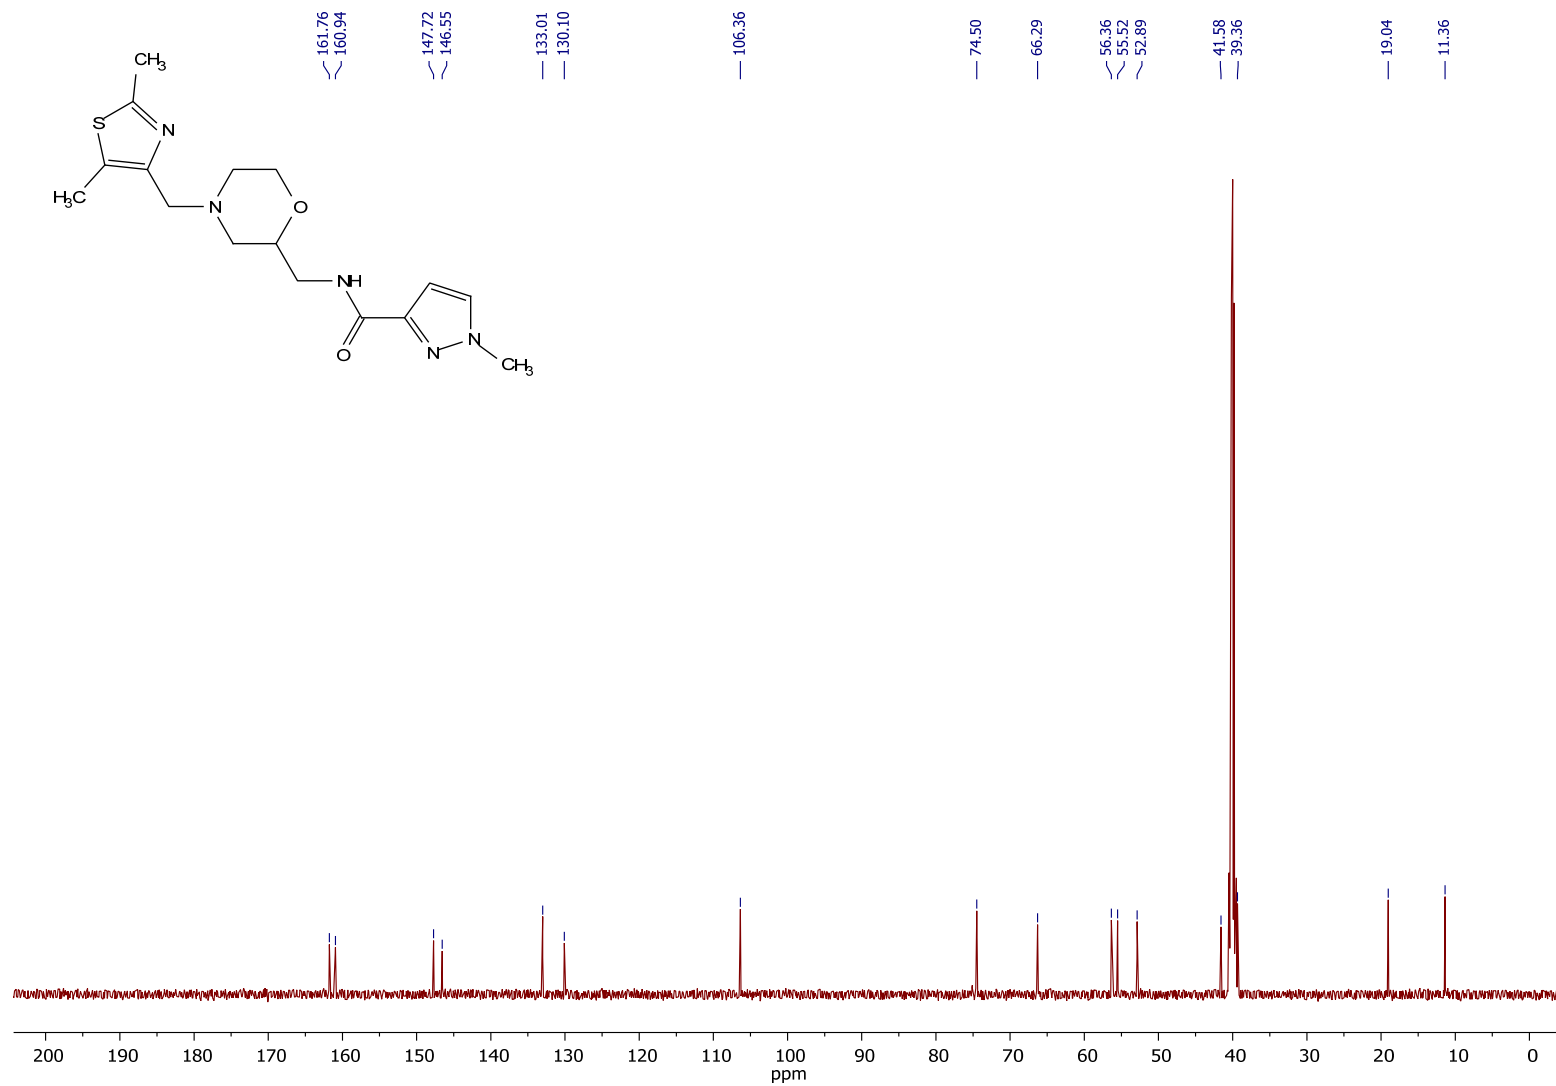

*N*-((4-((2,5-Dimethylthiazol-4-yl)methyl)morpholin-2-yl)methyl)-1-methyl-1*H*-pyrazole-3-carboxamide (**13**{74,107,35}),  
<sup>13</sup>C NMR (126 MHz, DMSO-*d*<sub>6</sub>)

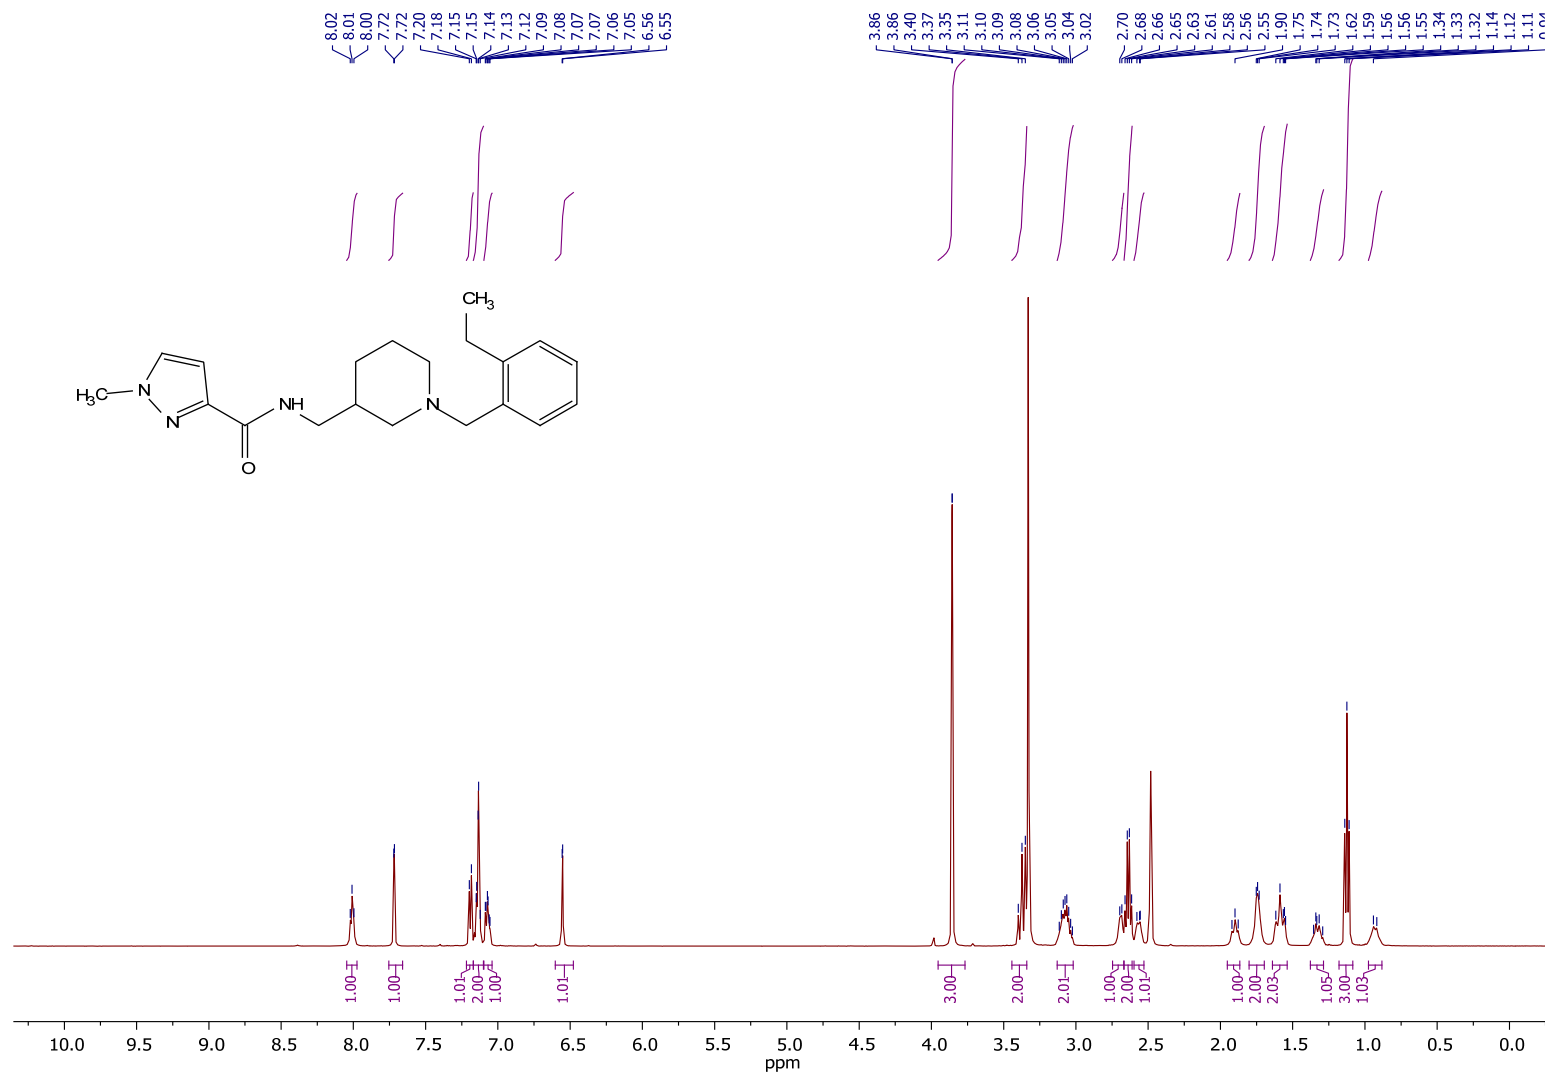

*N*-((1-(2-Ethylbenzyl)piperidin-3-yl)methyl)-1-methyl-1*H*-pyrazole-3-carboxamide (**13**{102,107,29}), <sup>1</sup>H NMR (500 MHz, DMSO-*d*<sub>6</sub>)

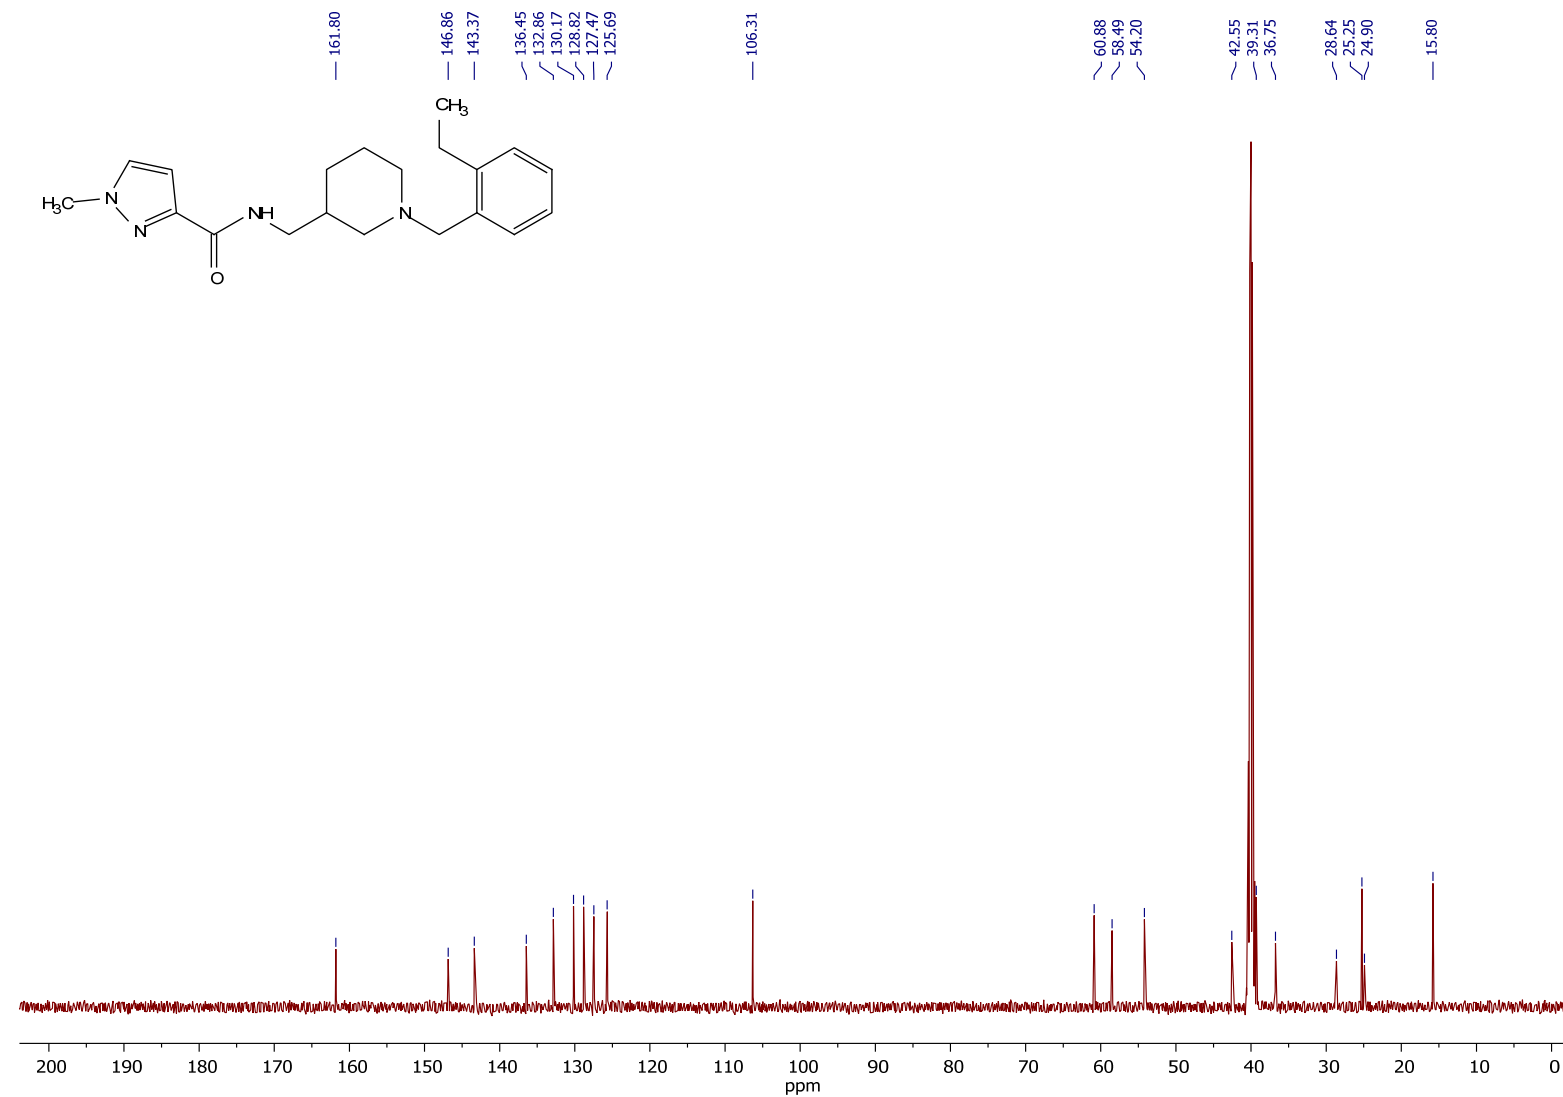

*N*-((1-(2-Ethylbenzyl)piperidin-3-yl)methyl)-1-methyl-1*H*-pyrazole-3-carboxamide (**13**{102,107,29}), <sup>13</sup>C NMR (126 MHz, DMSO-*d*<sub>6</sub>)

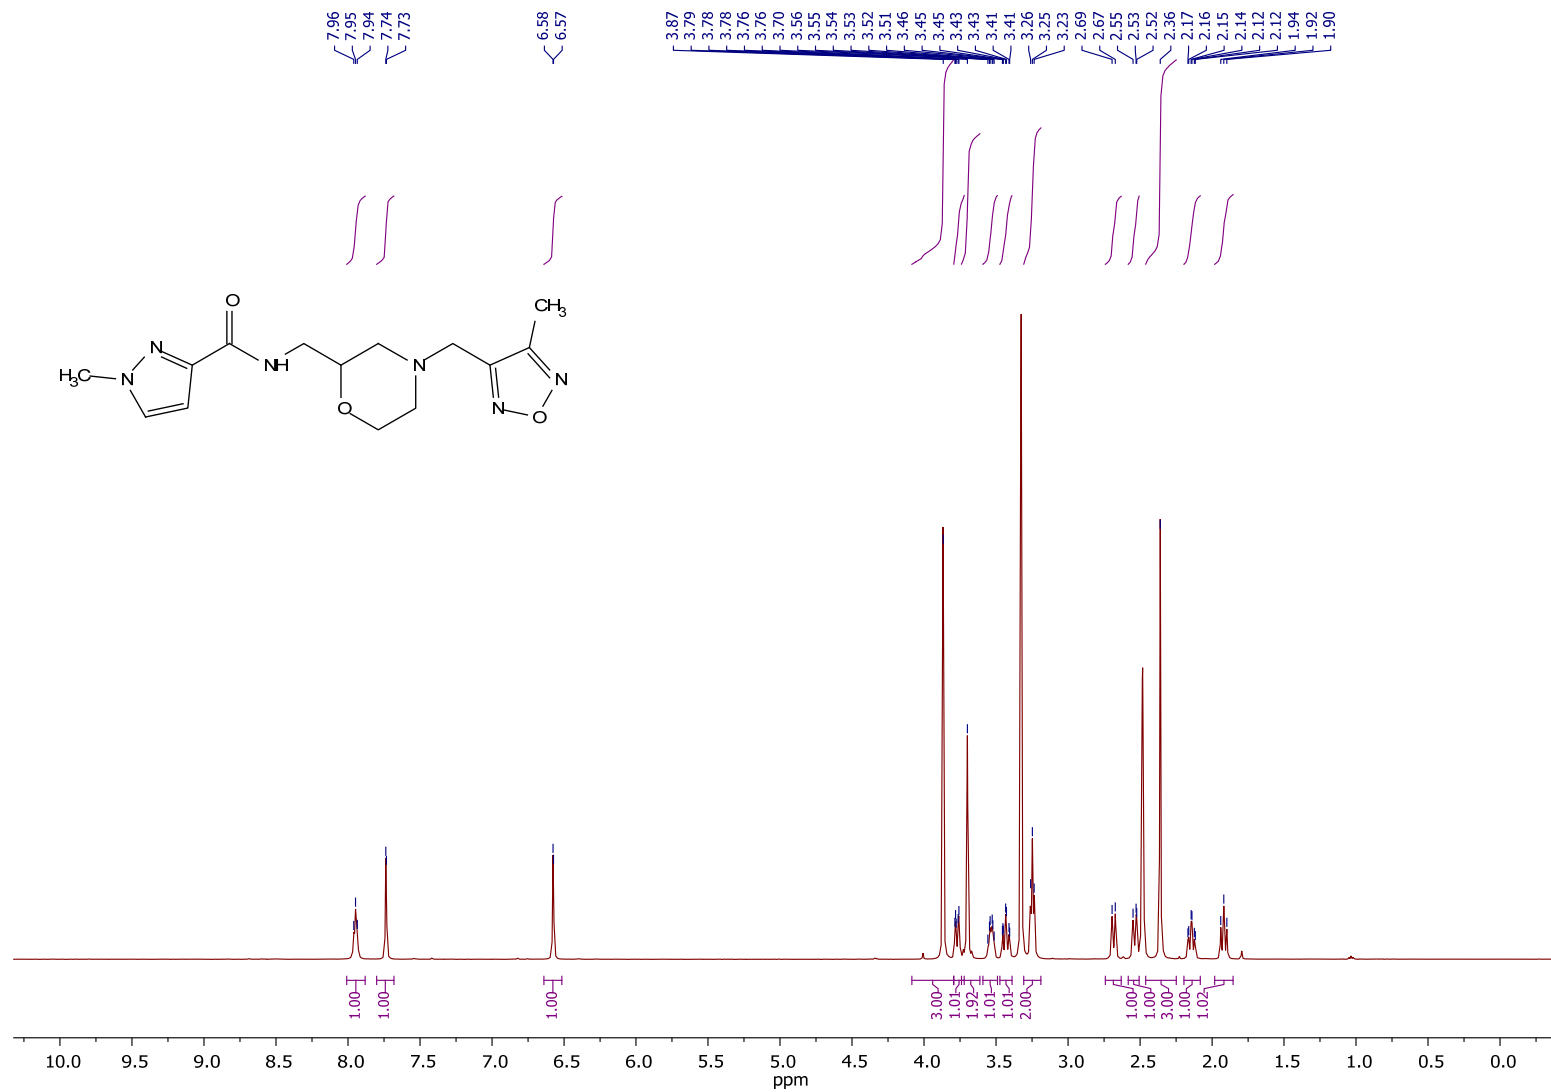

1-Methyl-N-((4-((4-methyl-1,2,5-oxadiazol-3-yl)methyl)morpholin-2-yl)methyl)-1H-pyrazole-3-carboxamide (**13**{74,107,38}),  
<sup>1</sup>H NMR (500 MHz, DMSO-d<sub>6</sub>)



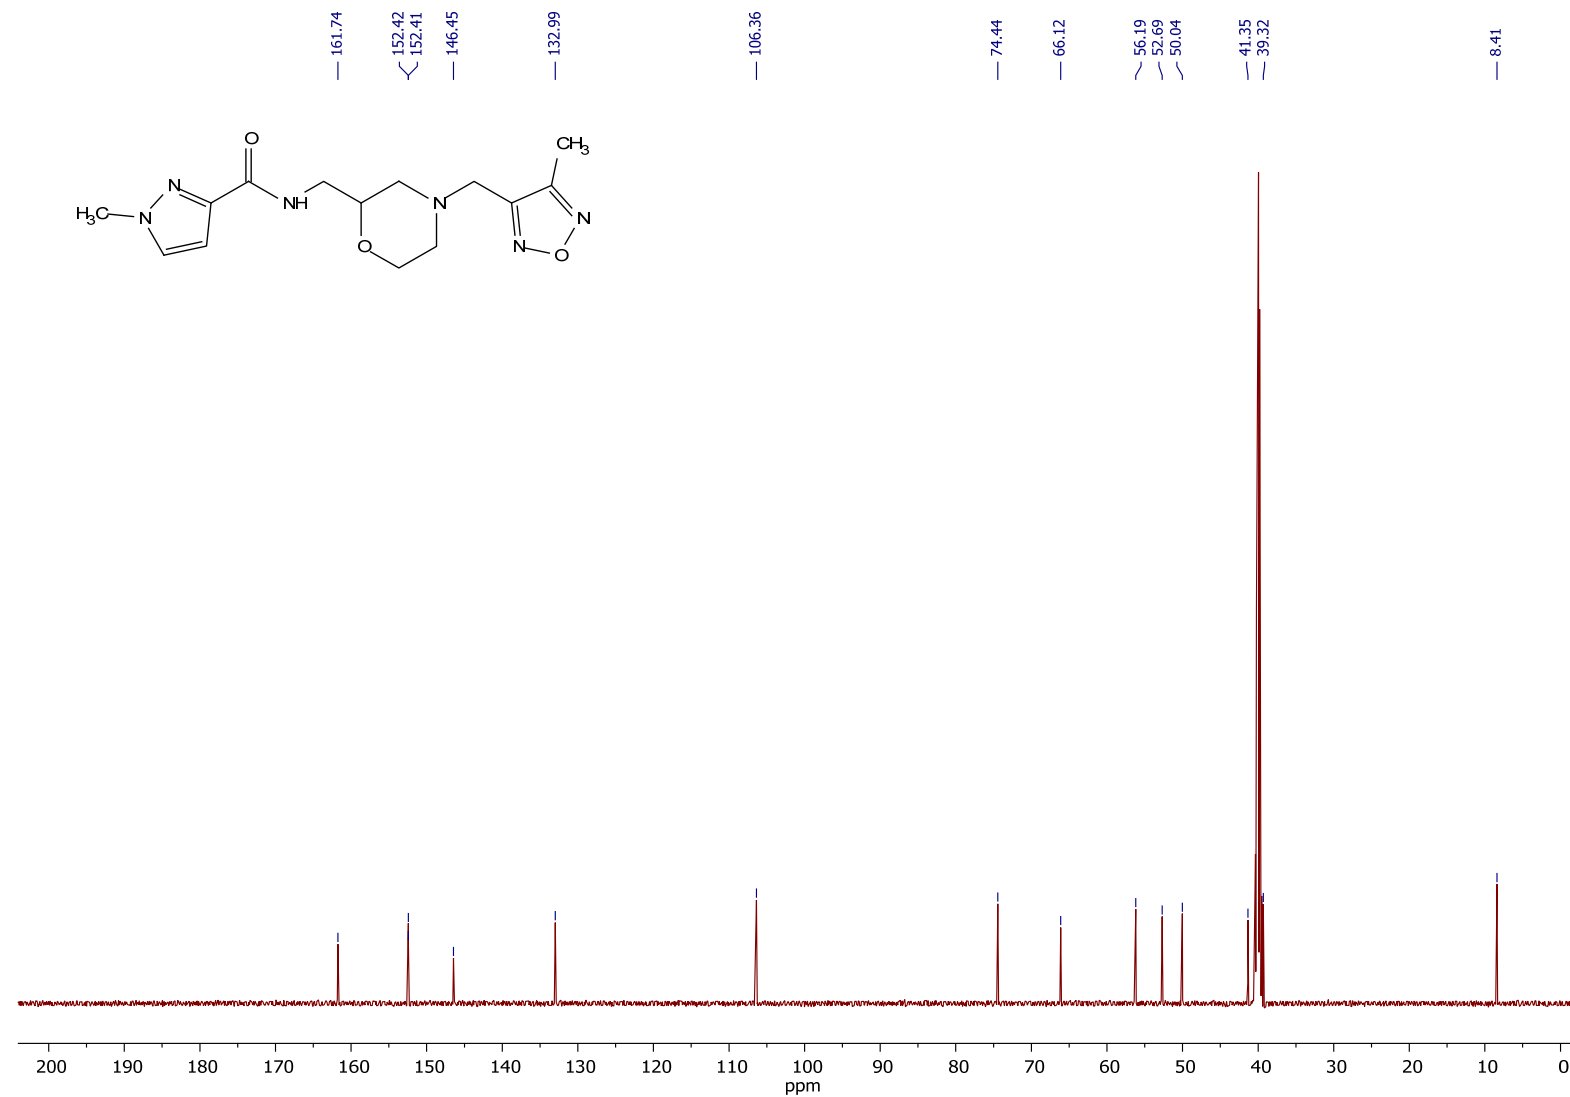

1-Methyl-N-((4-((4-methyl-1,2,5-oxadiazol-3-yl)methyl)morpholin-2-yl)methyl)-1H-pyrazole-3-carboxamide (**13**{74,107,38}),  
<sup>13</sup>C NMR (151 MHz, DMSO-*d*<sub>6</sub>)

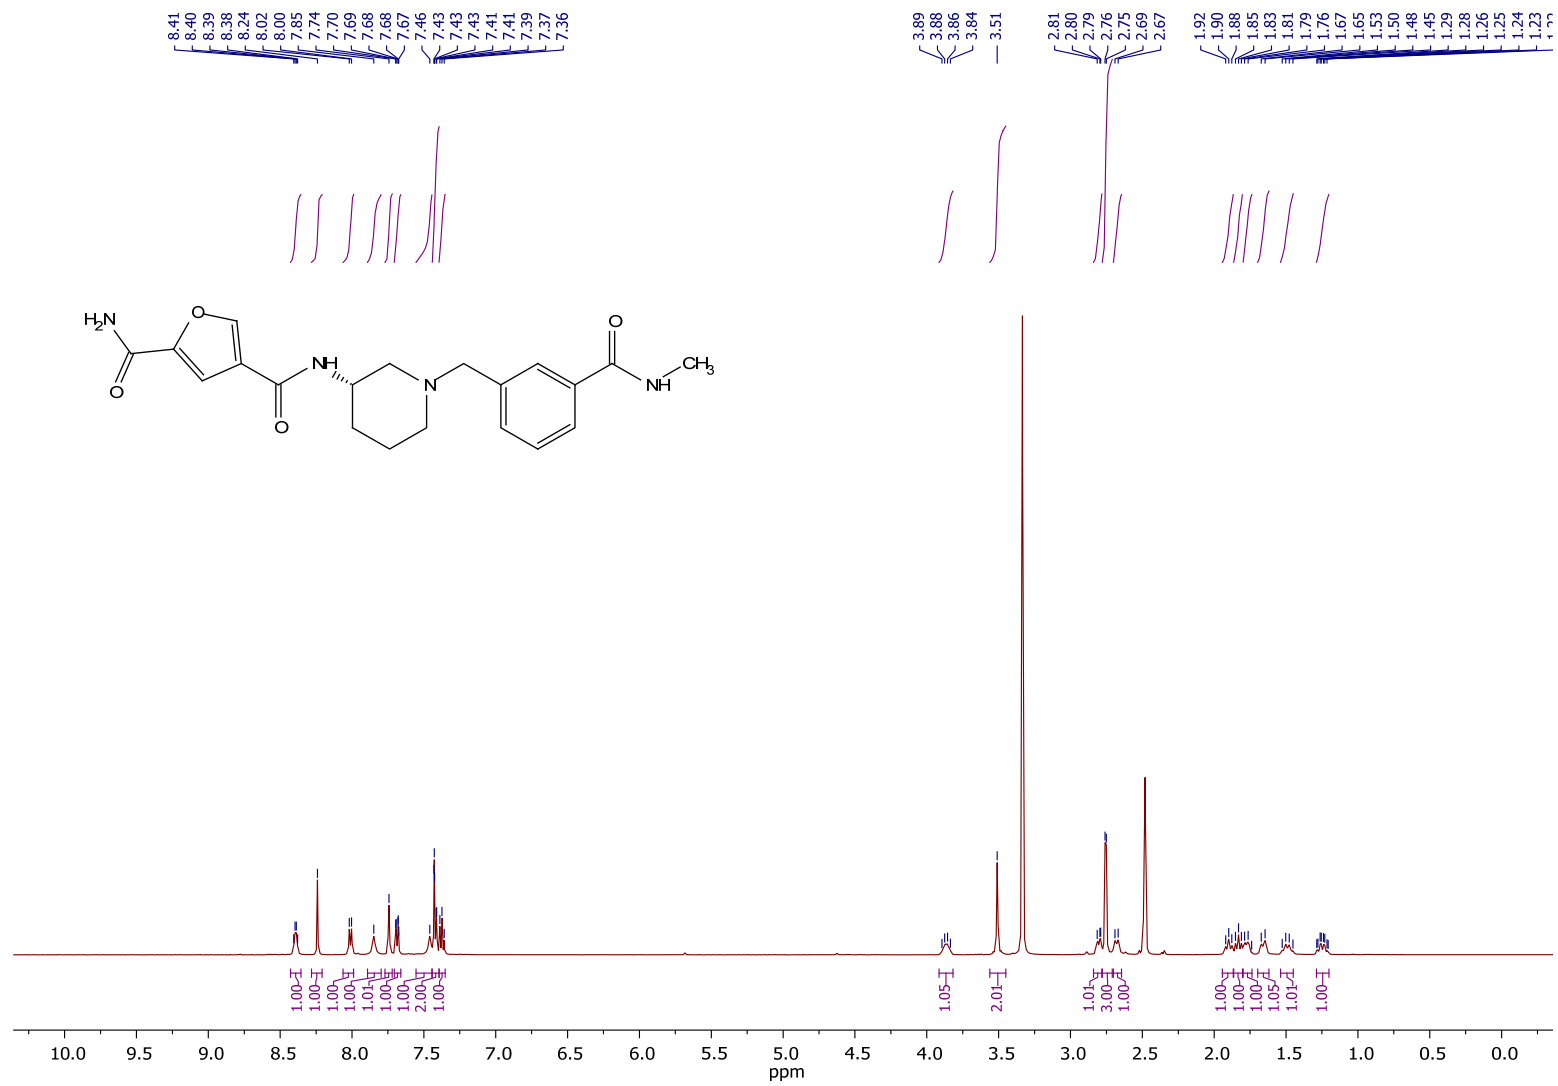

(*S*)-*N*<sup>t</sup>-(1-(3-(Methylcarbamoyl)benzyl)piperidin-3-yl)furan-2,4-dicarboxamide (**13** {139,243,50}), <sup>1</sup>H NMR (500 MHz, DMSO-d<sub>6</sub>)

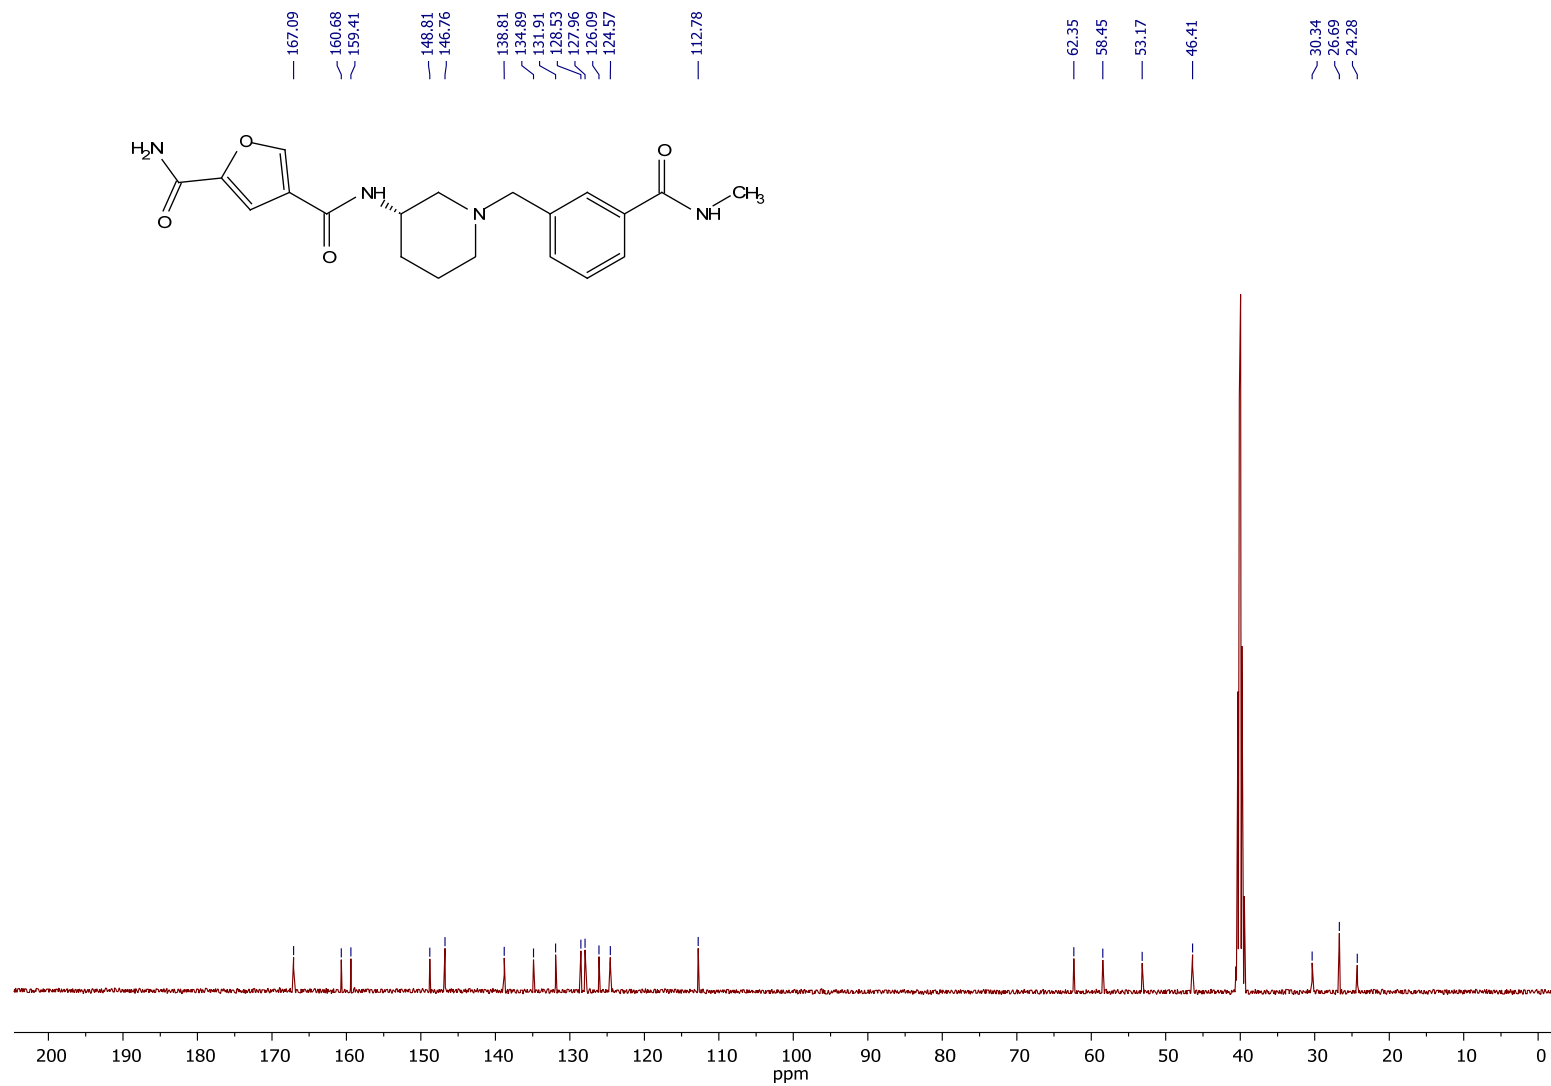

(*S*)-N<sup>4</sup>-(1-(3-(Methylcarbamoyl)benzyl)piperidin-3-yl)furan-2,4-dicarboxamide (**13**{139,243,50}), <sup>13</sup>C NMR (126 MHz, DMSO-*d*<sub>6</sub>)

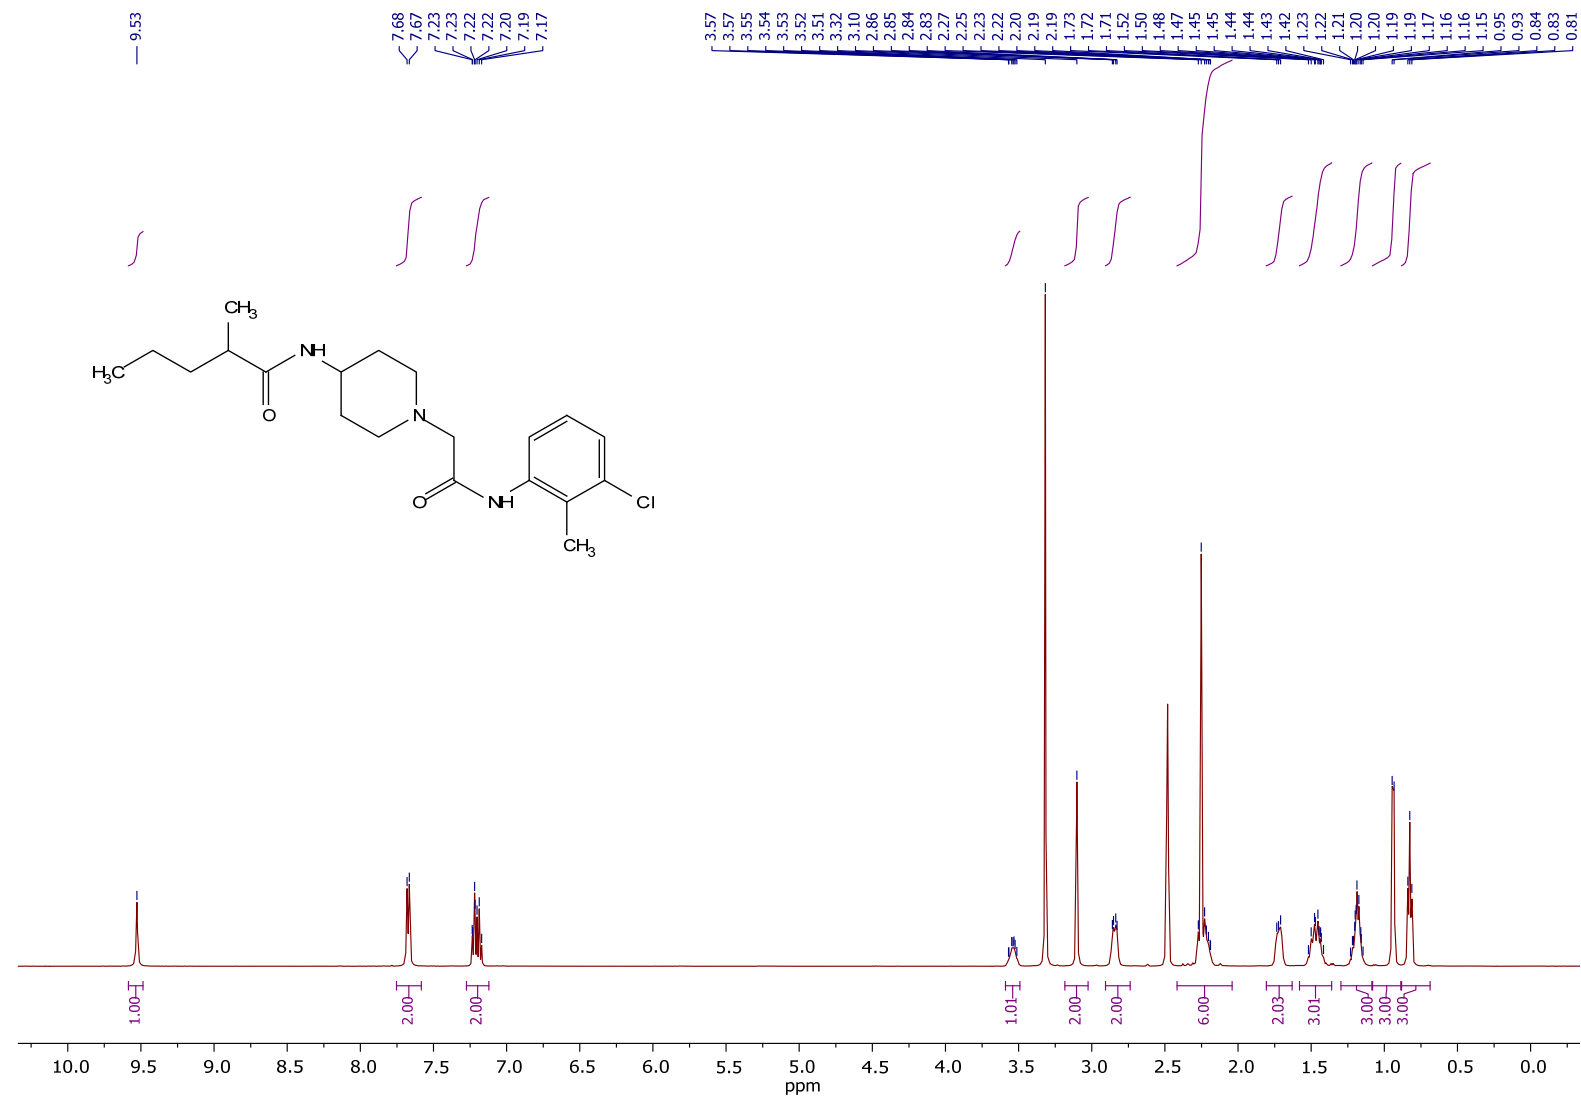

*N*-(1-(2-((3-chloro-2-methylphenyl)amino)-2-oxoethyl)piperidin-4-yl)-2-methylpentanamide (**13**{79,95,11}), <sup>1</sup>H NMR (500 MHz, DMSO-*d*<sub>6</sub>)

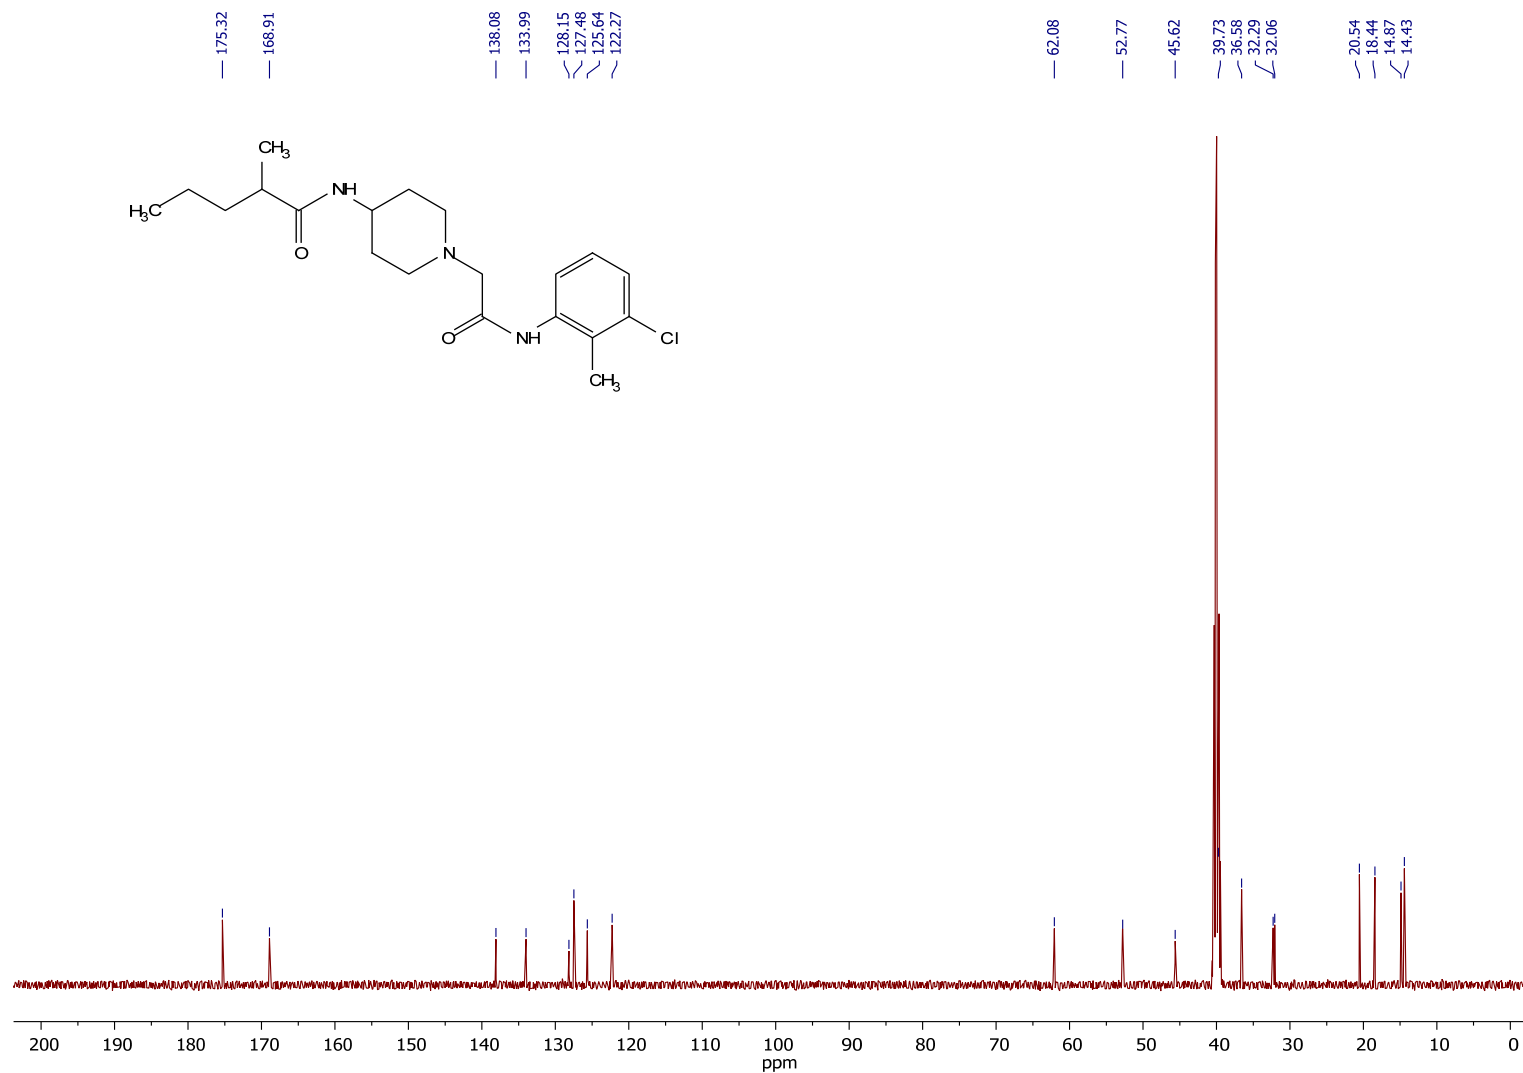

*N*-(1-(2-((3-Chloro-2-methylphenyl)amino)-2-oxoethyl)piperidin-4-yl)-2-methylpentanamide (**13** {79,95,11}), <sup>13</sup>C NMR (126 MHz, DMSO-*d*<sub>6</sub>)

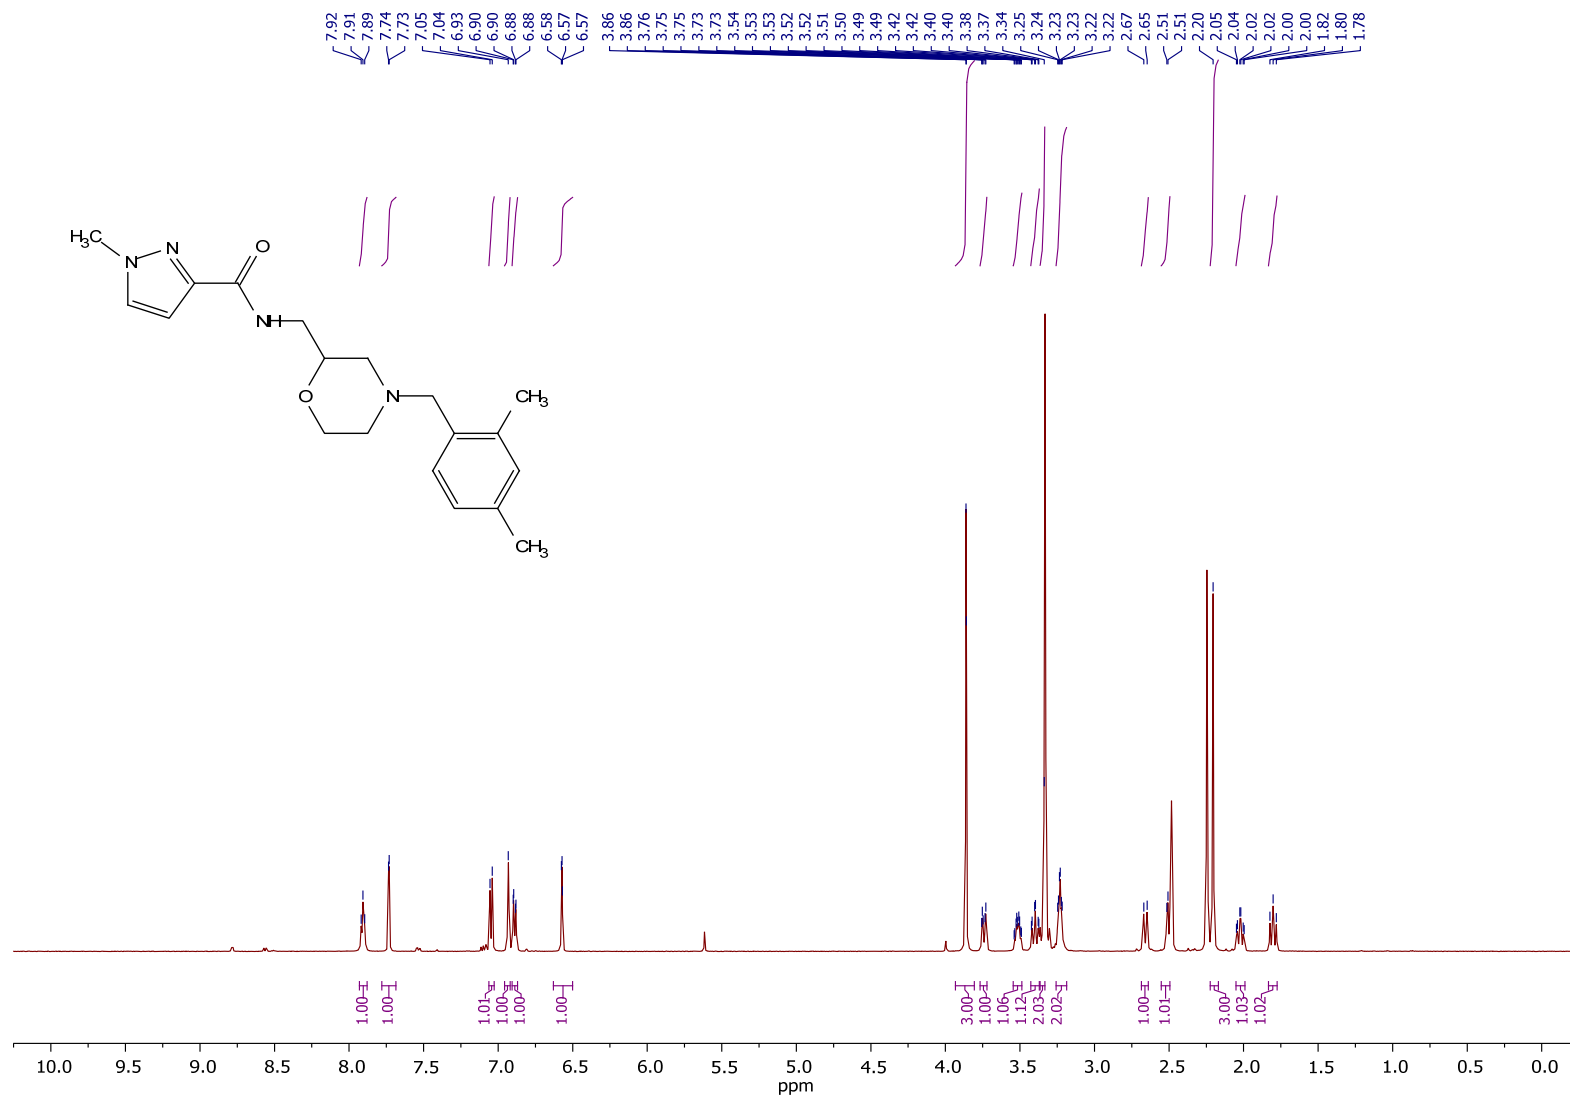

*N*-((4-(2,4-Dimethylbenzyl)morpholin-2-yl)methyl)-1-methyl-1*H*-pyrazole-3-carboxamide (**13**{74,107,12}), <sup>1</sup>H NMR (500 MHz, DMSO-d<sub>6</sub>)

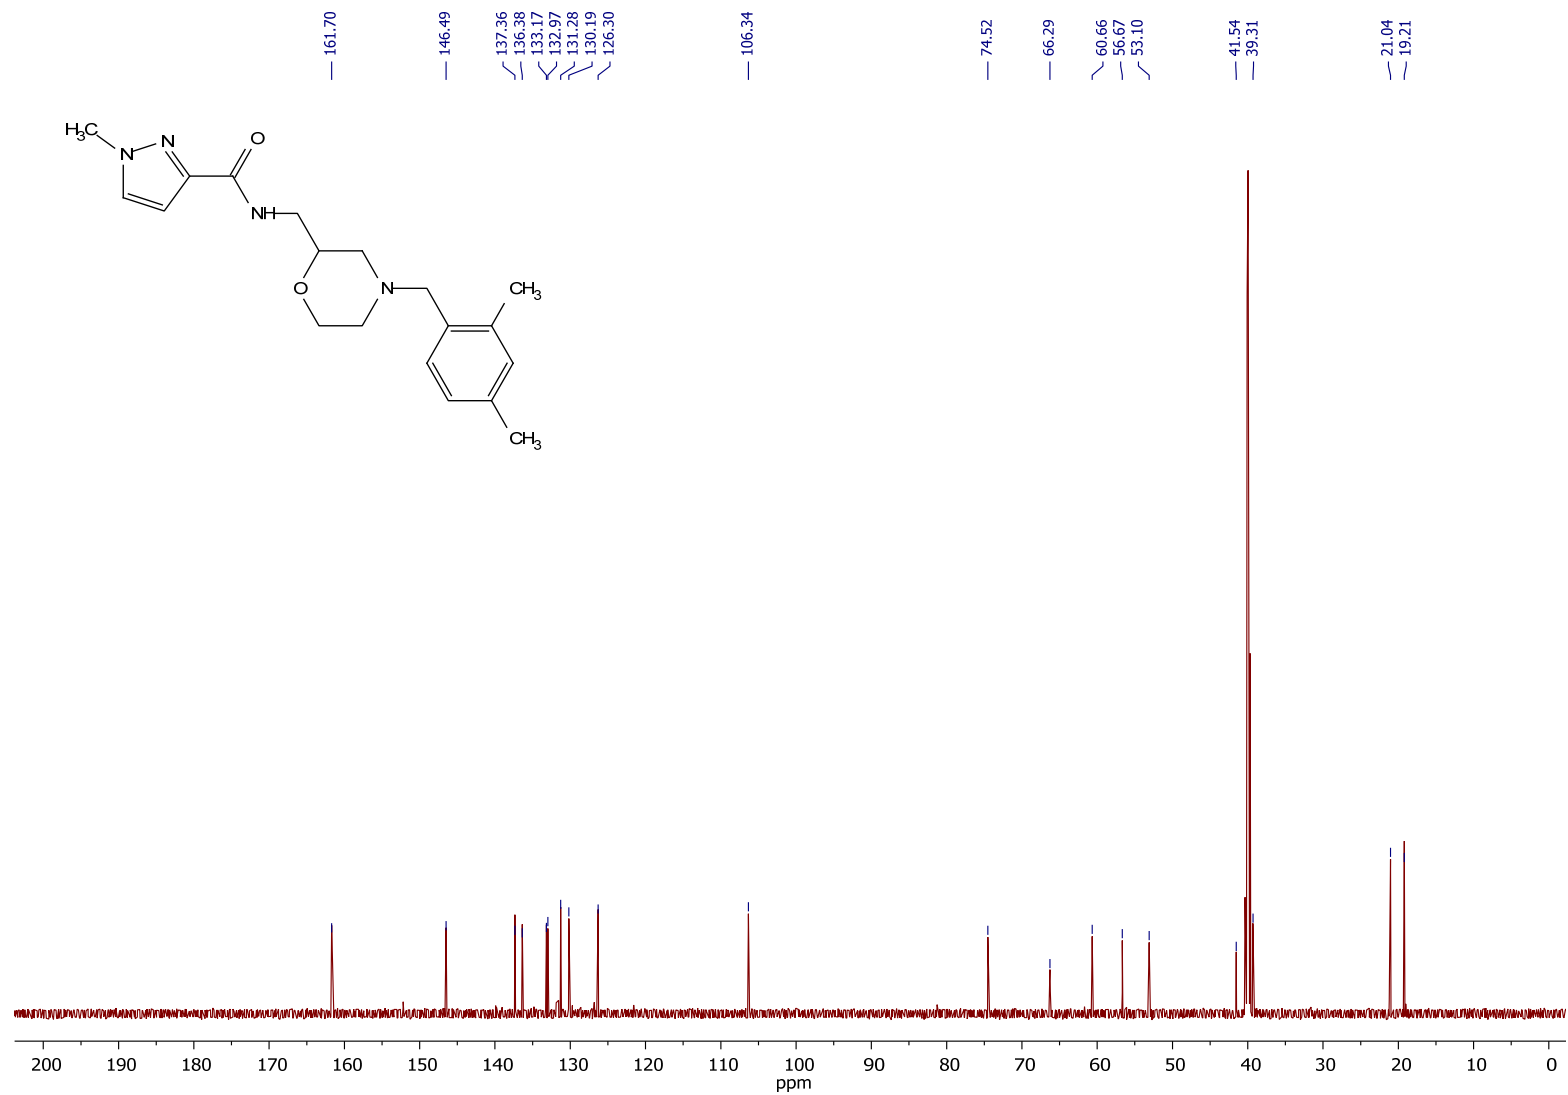

*N*-((4-(2,4-Dimethylbenzyl)morpholin-2-yl)methyl)-1-methyl-1*H*-pyrazole-3-carboxamide (**13**{74,107,12}),  $^{13}\text{C}$  NMR (151 MHz, DMSO- $d_6$ )

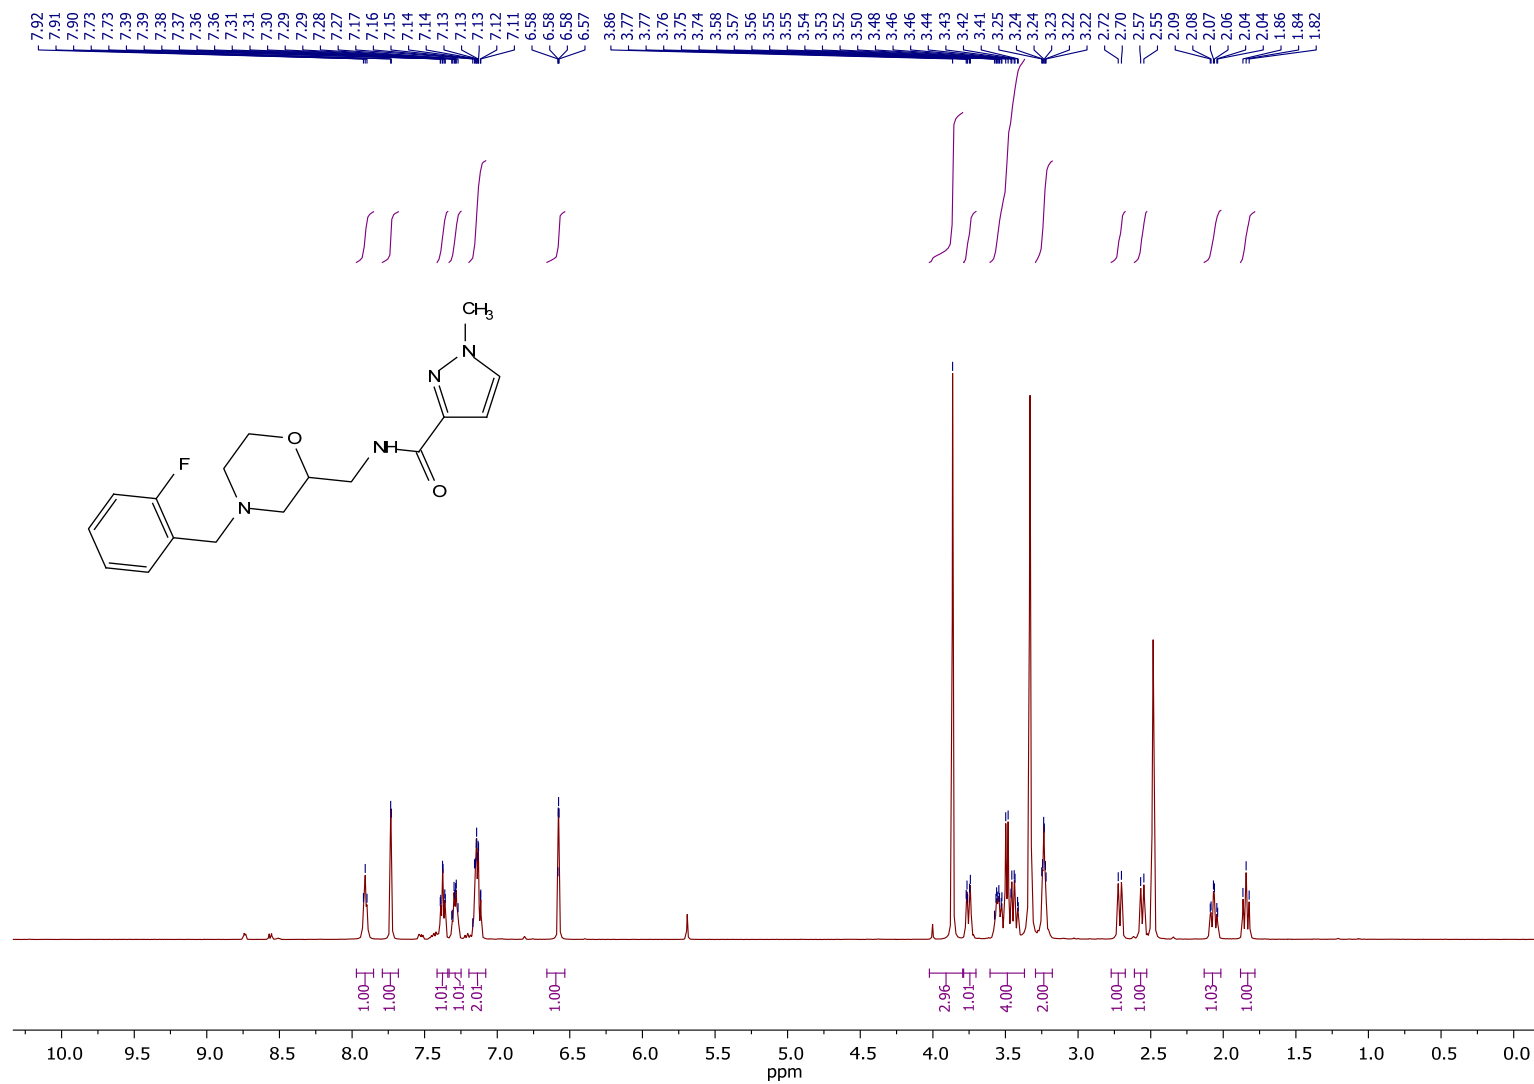

*N*-((4-(2-Fluorobenzyl)morpholin-2-yl)methyl)-1-methyl-1*H*-pyrazole-3-carboxamide (**13**{74,107,25}), <sup>1</sup>H NMR (500 MHz, DMSO-d<sub>6</sub>)



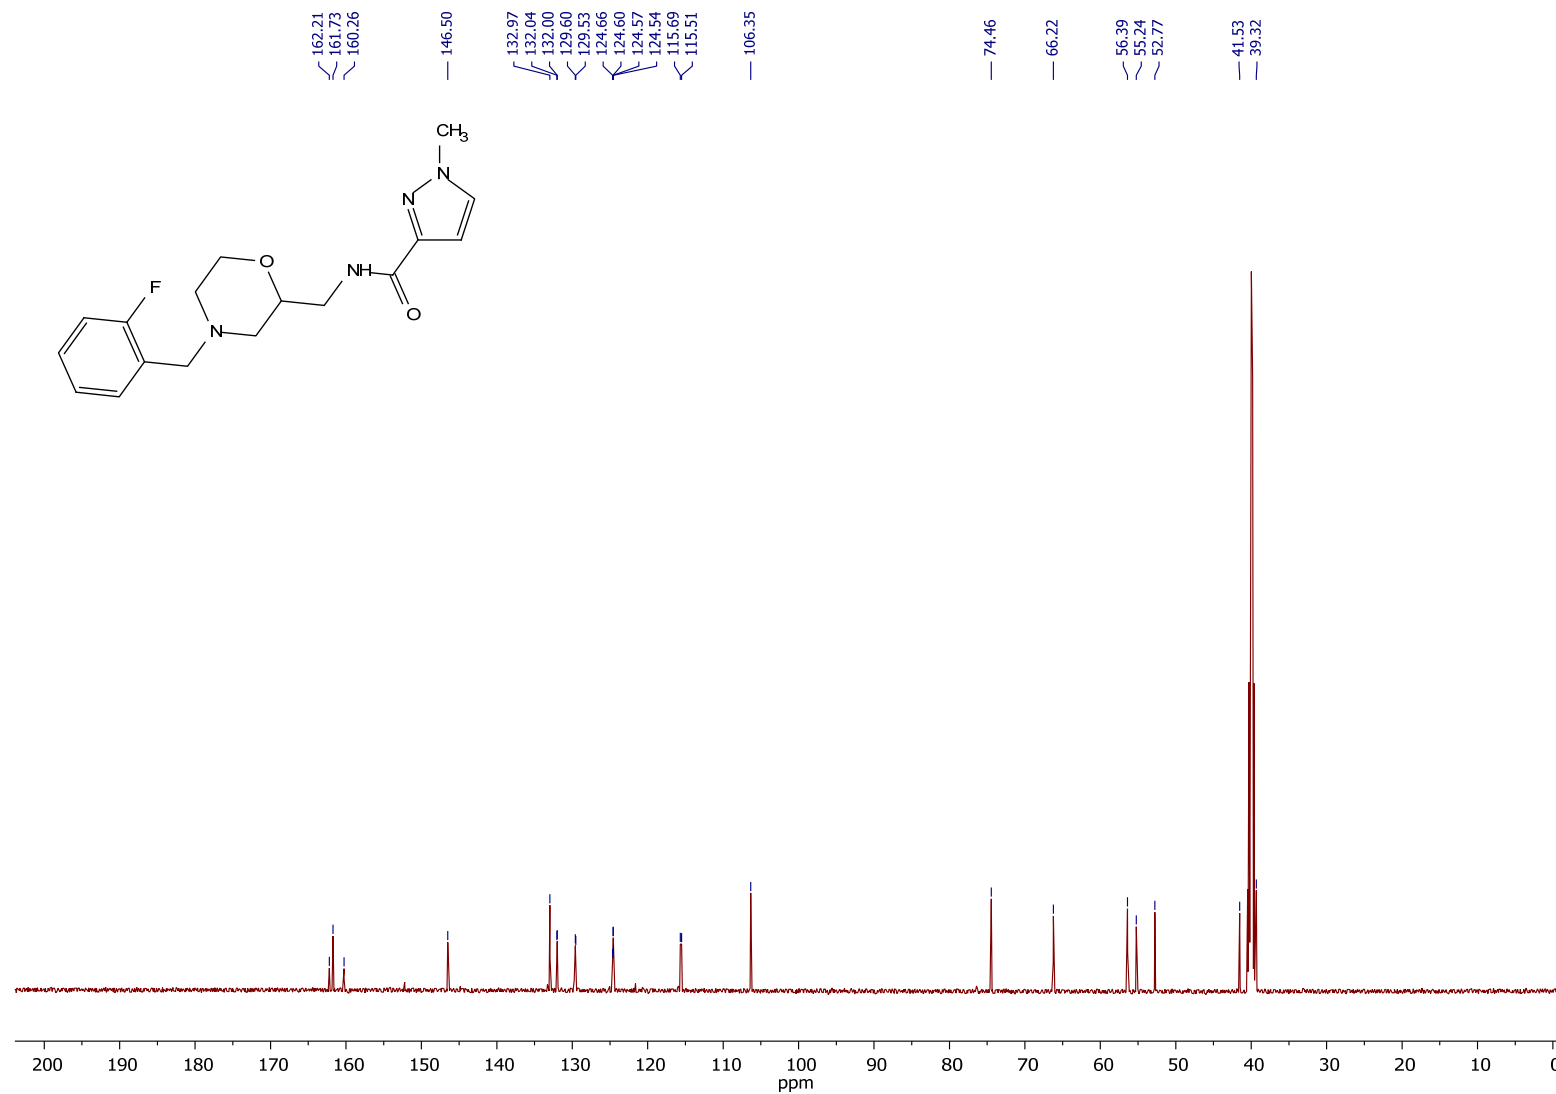

*N*-((4-(2-Fluorobenzyl)morpholin-2-yl)methyl)-1-methyl-1*H*-pyrazole-3-carboxamide (**13**{74,107,25}), <sup>13</sup>C NMR (126 MHz, DMSO-*d*<sub>6</sub>)

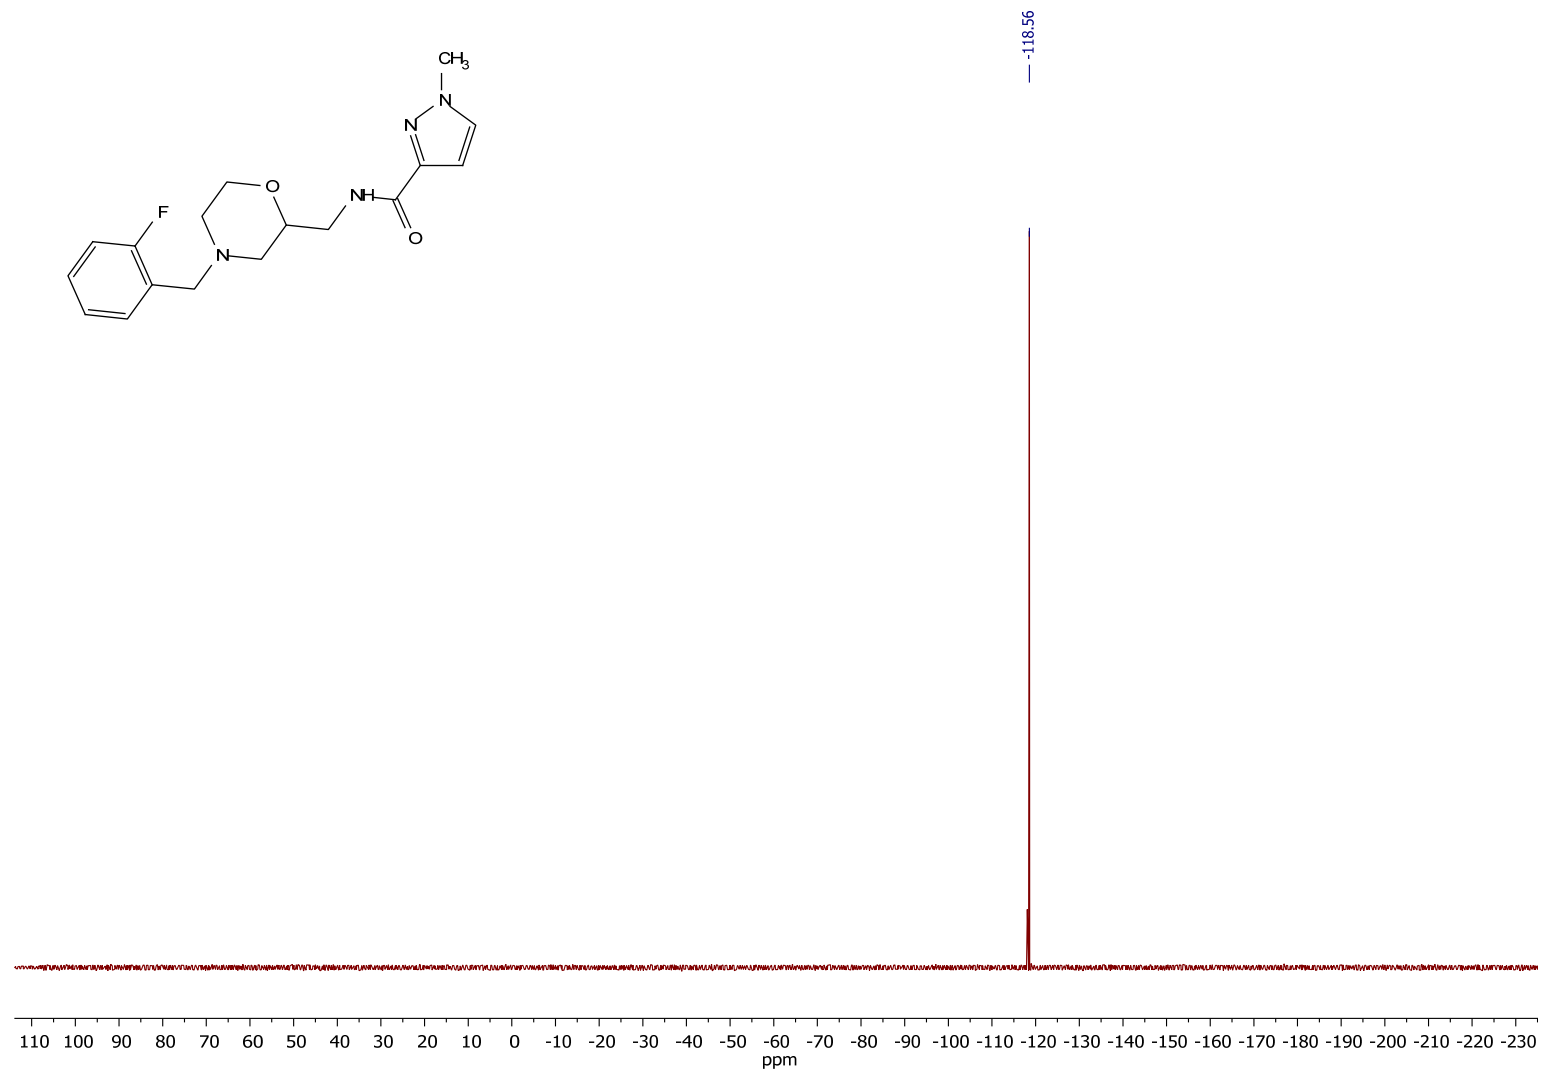

*N*-((4-(2-Fluorobenzyl)morpholin-2-yl)methyl)-1-methyl-1*H*-pyrazole-3-carboxamide (**13**{74,107,25}), <sup>19</sup>F NMR (376 MHz, DMSO-*d*<sub>6</sub>)

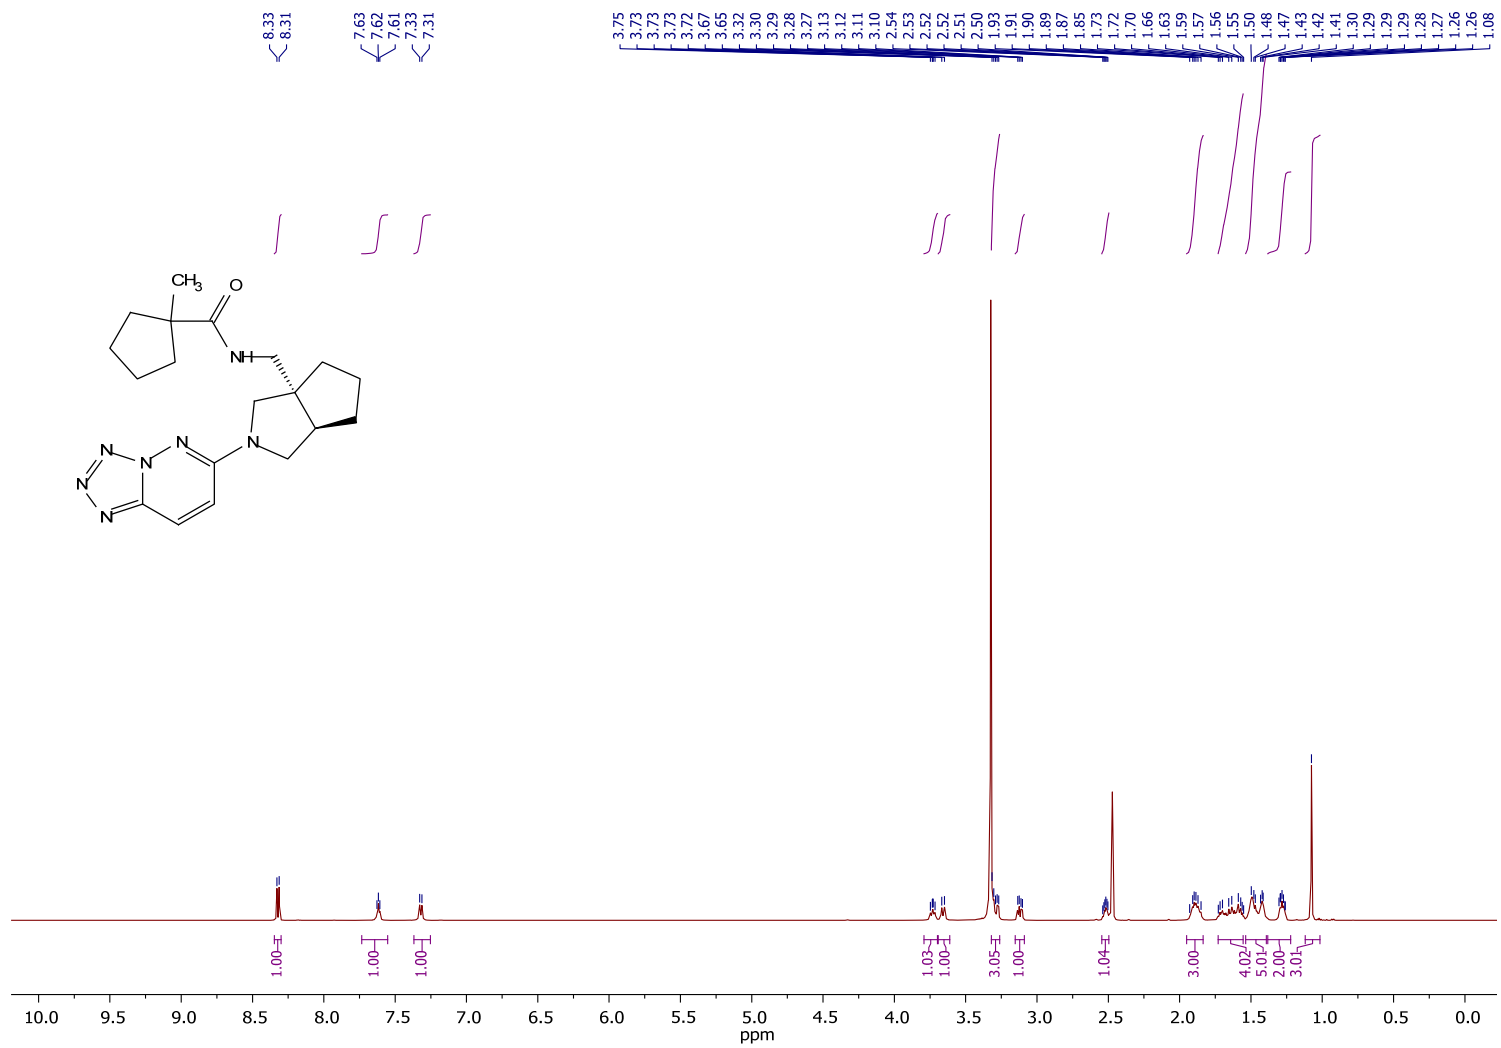

*rac*-1-Methyl-*N*-(((3*aR*,6*aS*)-2-(tetrazolo[1,5-*b*]pyridazin-6-yl)hexahydrocyclopenta[*c*]pyrrol-3*a*(1*H*)-yl)methyl)cyclopentane-1-carboxamide (**14**{19,35,360}), <sup>1</sup>H NMR (600 MHz, DMSO-*d*<sub>6</sub>)

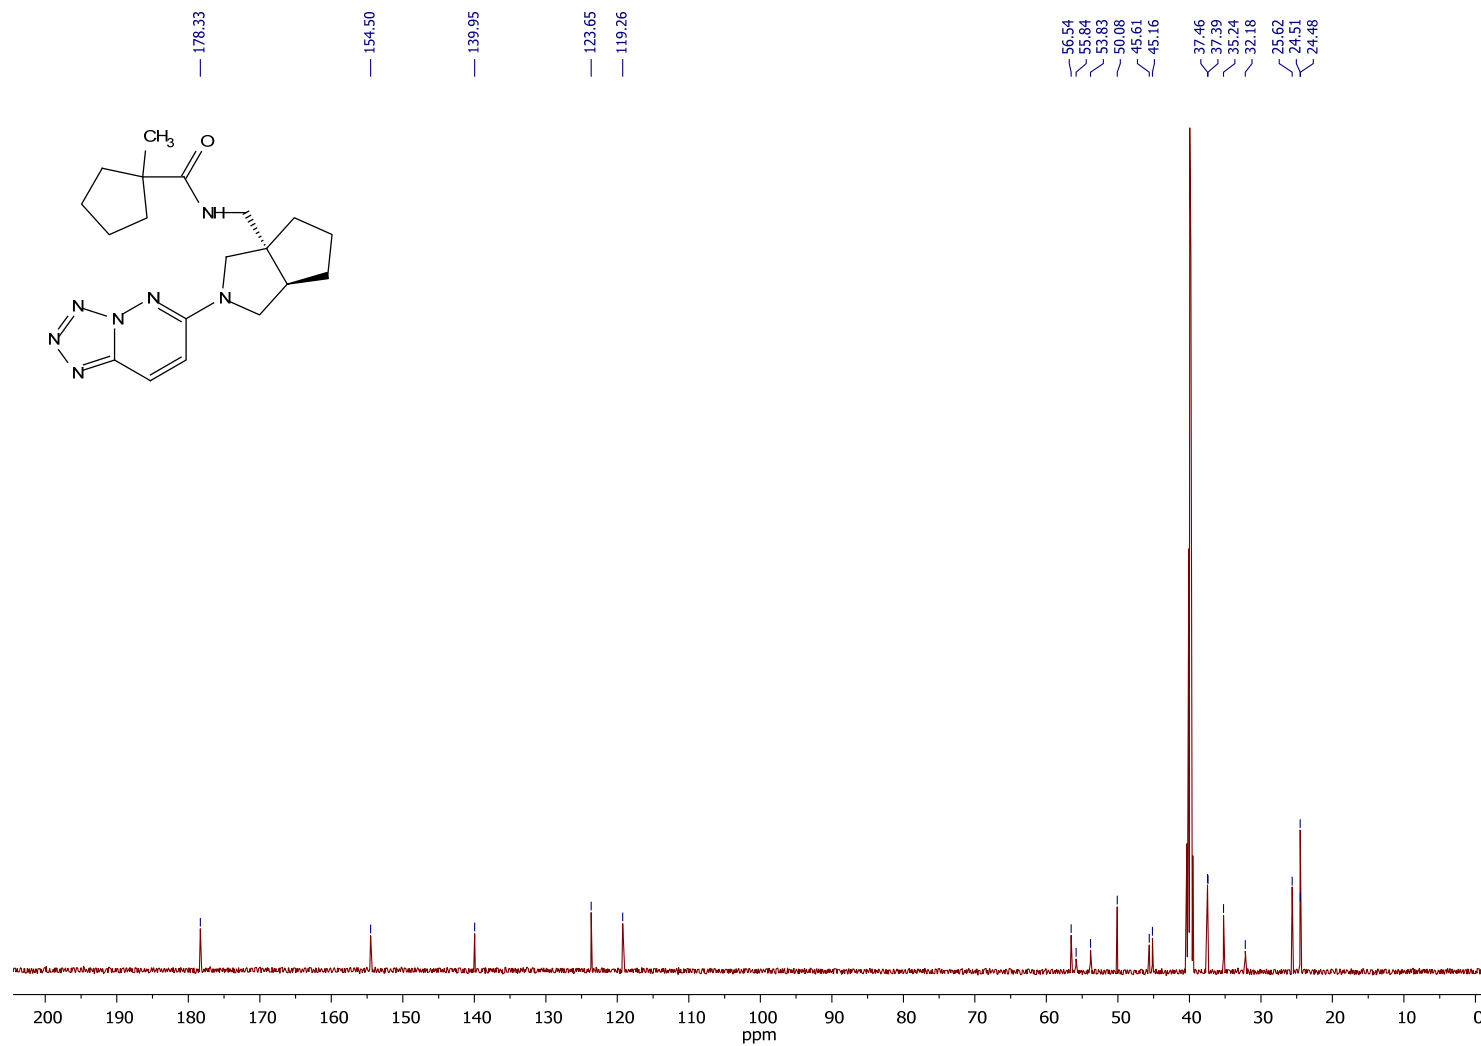

*rac*-1-Methyl-*N*-(((3*aR*,6*aS*)-2-(tetrazolo[1,5-*b*]pyridazin-6-yl)hexahydrocyclopenta[*c*]pyrrol-3*a*(1*H*)-yl)methyl)cyclopentane-1-carboxamide (**14**{19,35,360}),  $^{13}\text{C}$  NMR (151 MHz, DMSO- $d_6$ )

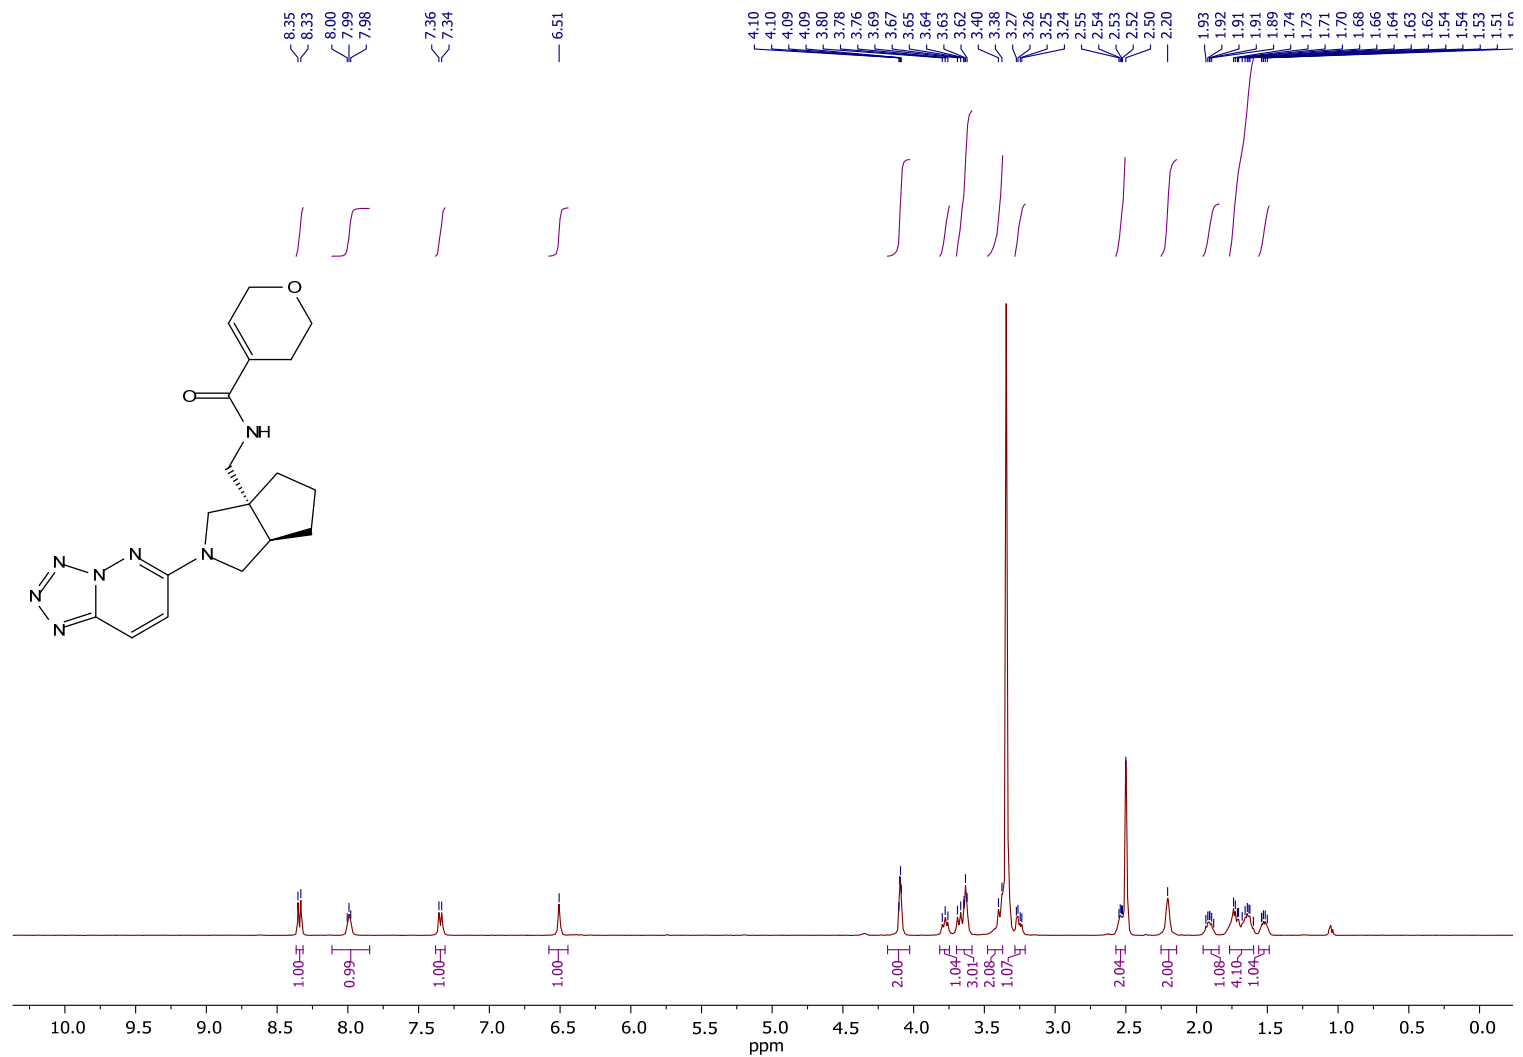

*rac*-*N*-(((3*aR*,6*aS*)-2-(Tetrazolo[1,5-*b*]pyridazin-6-yl)hexahydrocyclopenta[*c*]pyrrol-3*a*(1*H*)-yl)methyl)-3,6-dihydro-2*H*-pyran-4-carboxamide (**14**{19,35,361}), <sup>1</sup>H NMR (500 MHz, DMSO-*d*<sub>6</sub>)

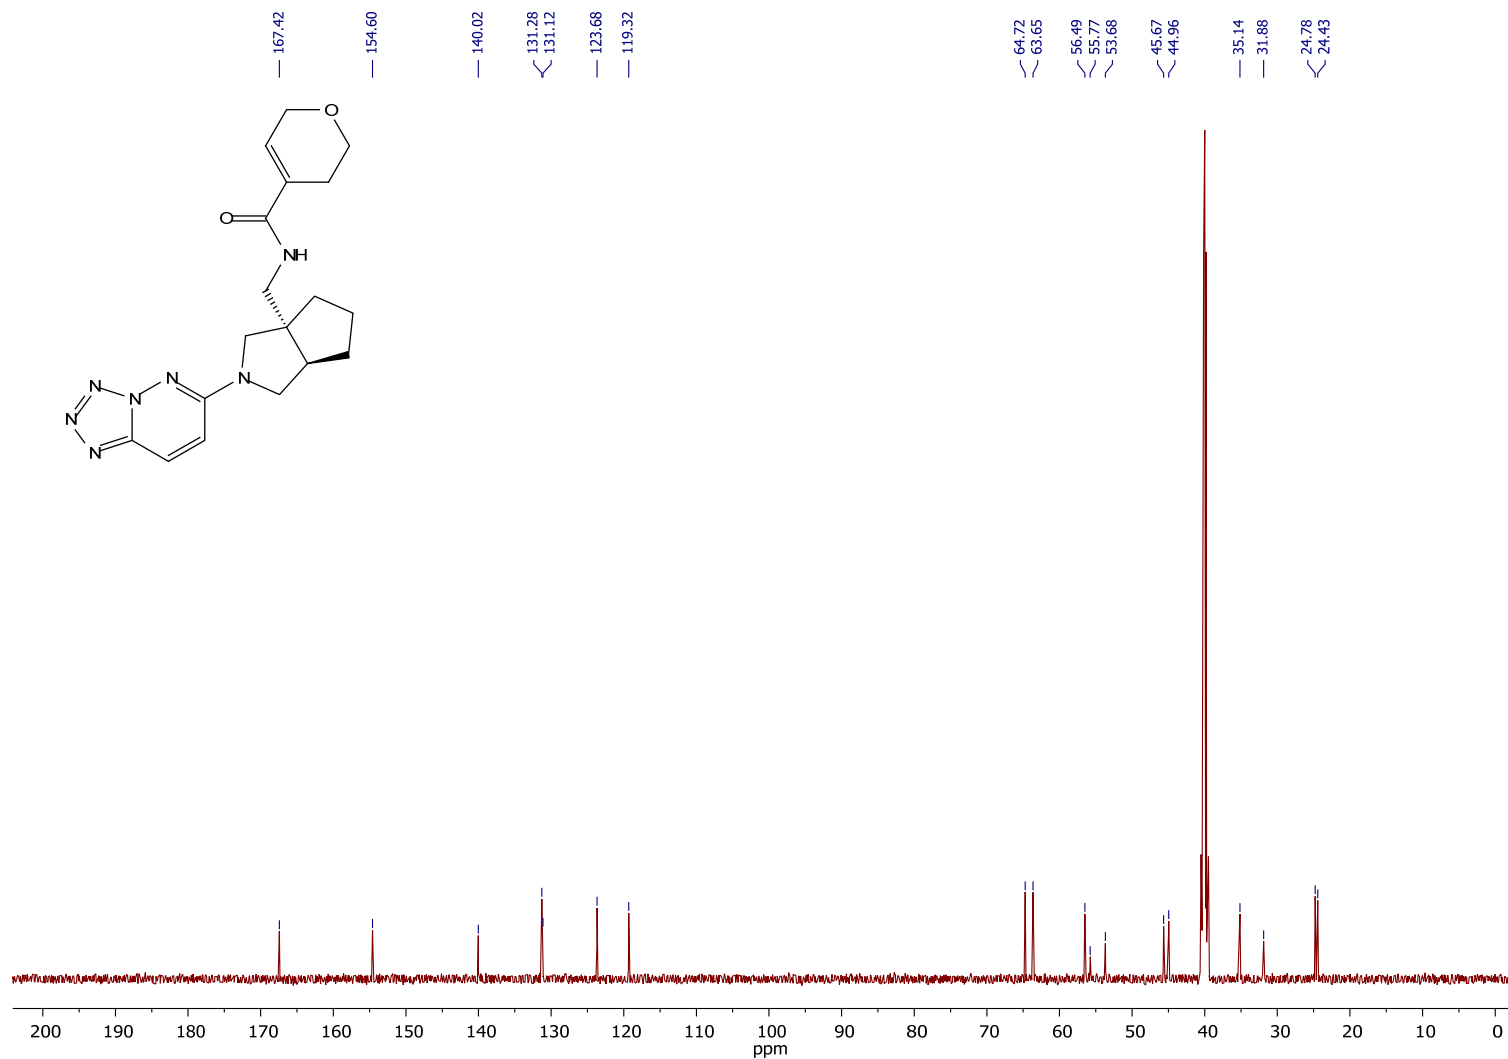

*rac-N-(((3aR,6aS)-2-(Tetrazolo[1,5-*b*]pyridazin-6-yl)hexahydrocyclopenta[*c*]pyrrol-3a(1H)-yl)methyl)-3,6-dihydro-2H-pyran-4-carboxamide* (**14**{19,35,36I}),  $^{13}\text{C}$  NMR (126 MHz, DMSO- $d_6$ )

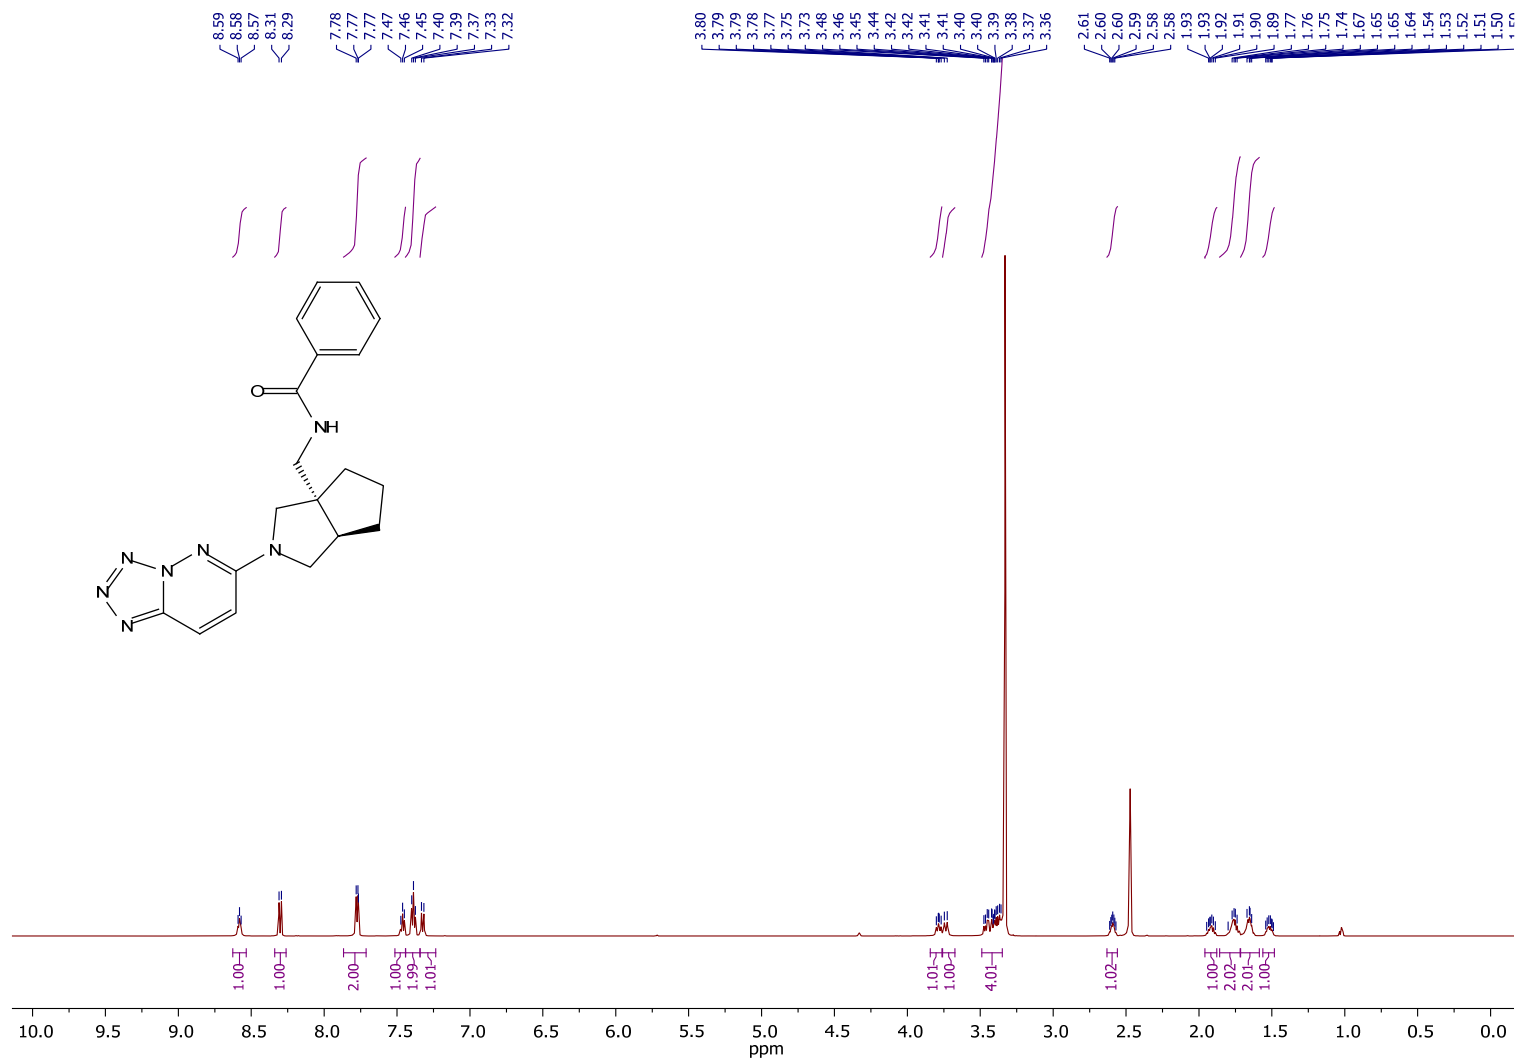

*rac-N-(((3aR,6aS)-2-(Tetrazolo[1,5-b]pyridazin-6-yl)hexahydrocyclopenta[c]pyrrol-3a(1H)-yl)methyl)benzamide* (14{19,35,367}),  
<sup>1</sup>H NMR (600 MHz, DMSO-*d*<sub>6</sub>)

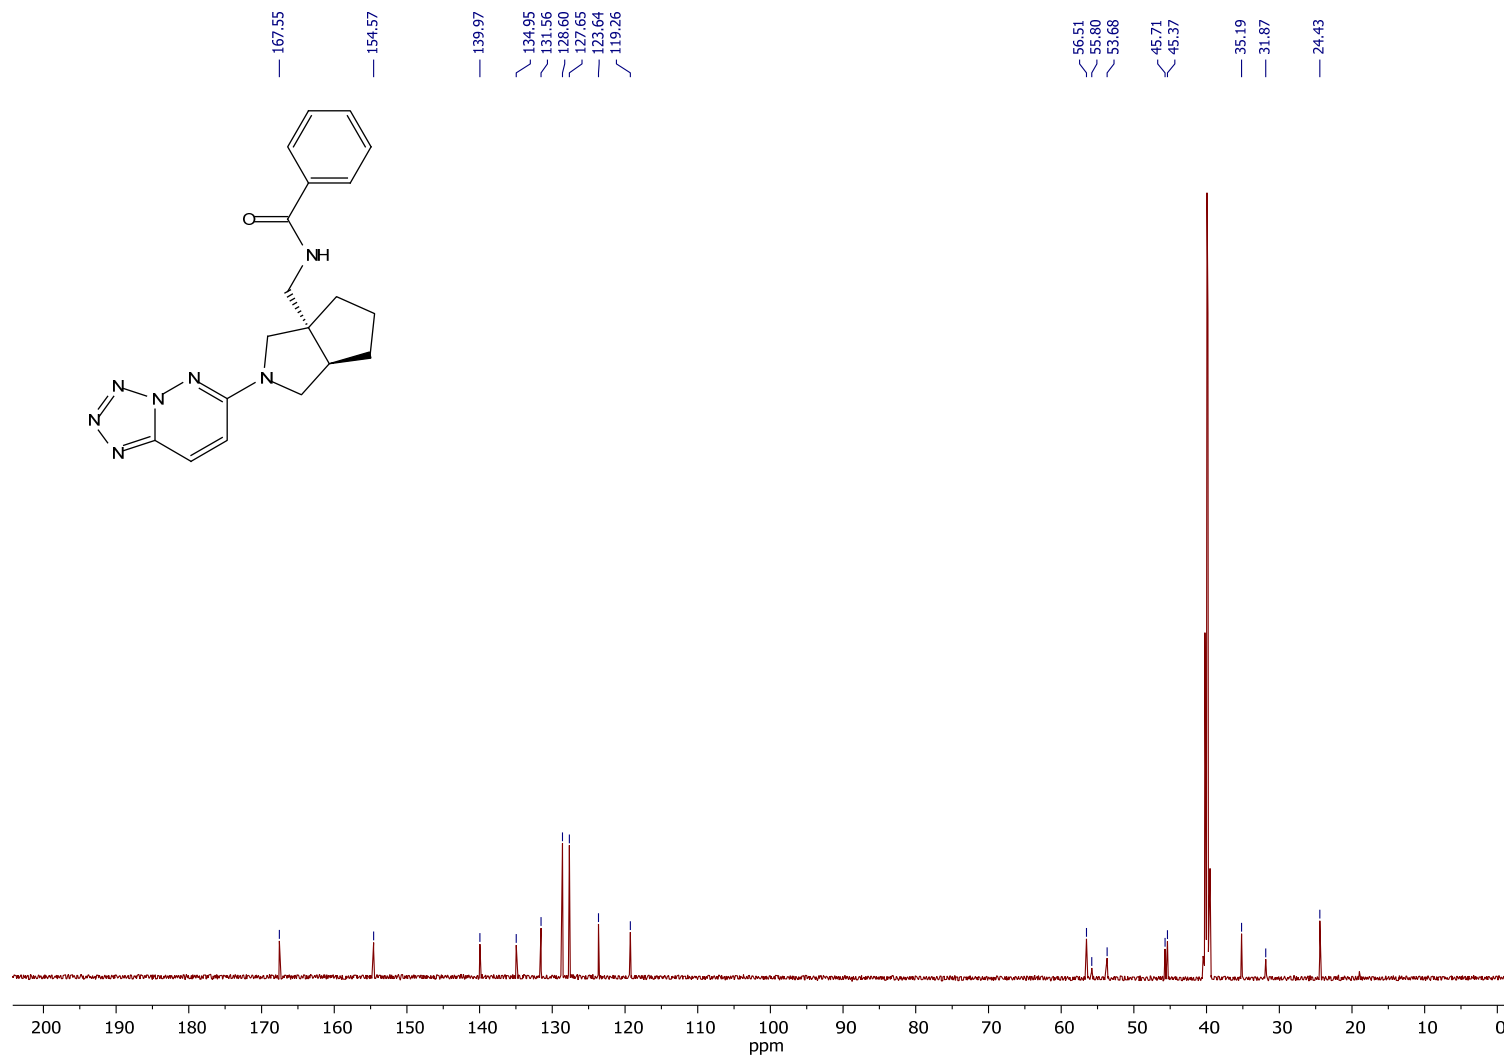

*rac-N-(((3aR,6aS)-2-(Tetrazolo[1,5-*b*]pyridazin-6-yl)hexahydrocyclopenta[*c*]pyrrol-3a(1H)-yl)methyl)benzamide* (**14**{19,35,367}),  
 $^{13}\text{C}$  NMR (151 MHz, DMSO- $d_6$ )



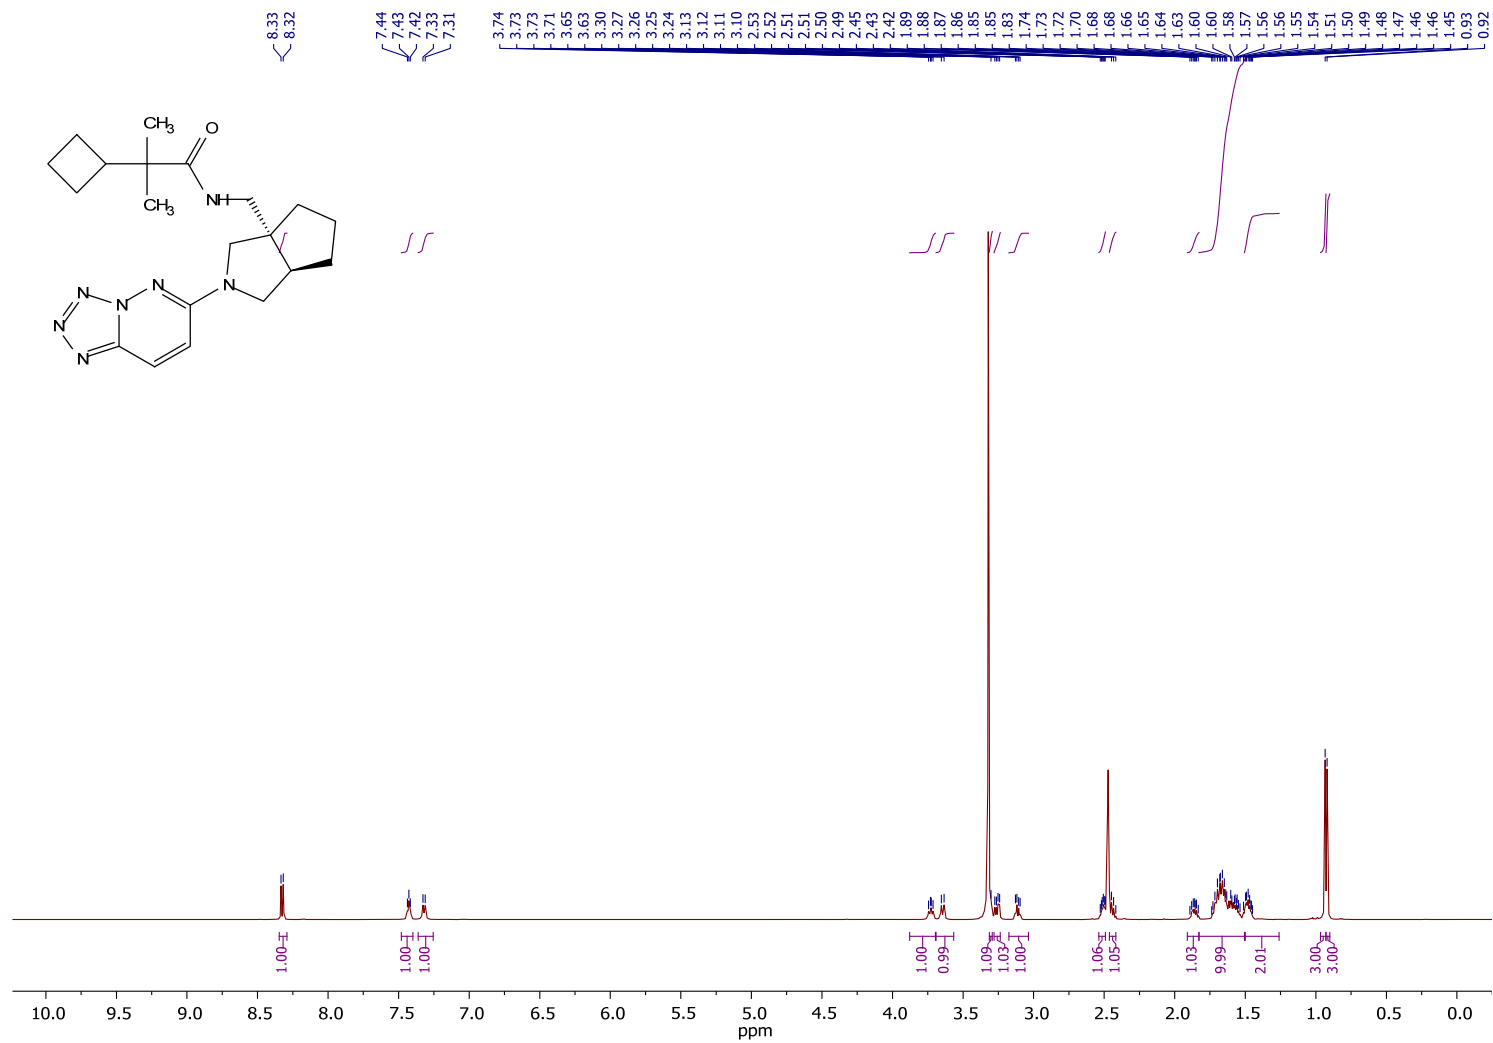

*rac*-2-Cyclobutyl-2-methyl-*N*-(((3*aR*,6*aS*)-2-(tetrazolo[1,5-*b*]pyridazin-6-yl)hexahydrocyclopenta[*c*]pyrrol-3*a*(1*H*)-yl)methyl)propanamide (**14**{19,35,369}), <sup>1</sup>H NMR (600 MHz, DMSO-*d*<sub>6</sub>)

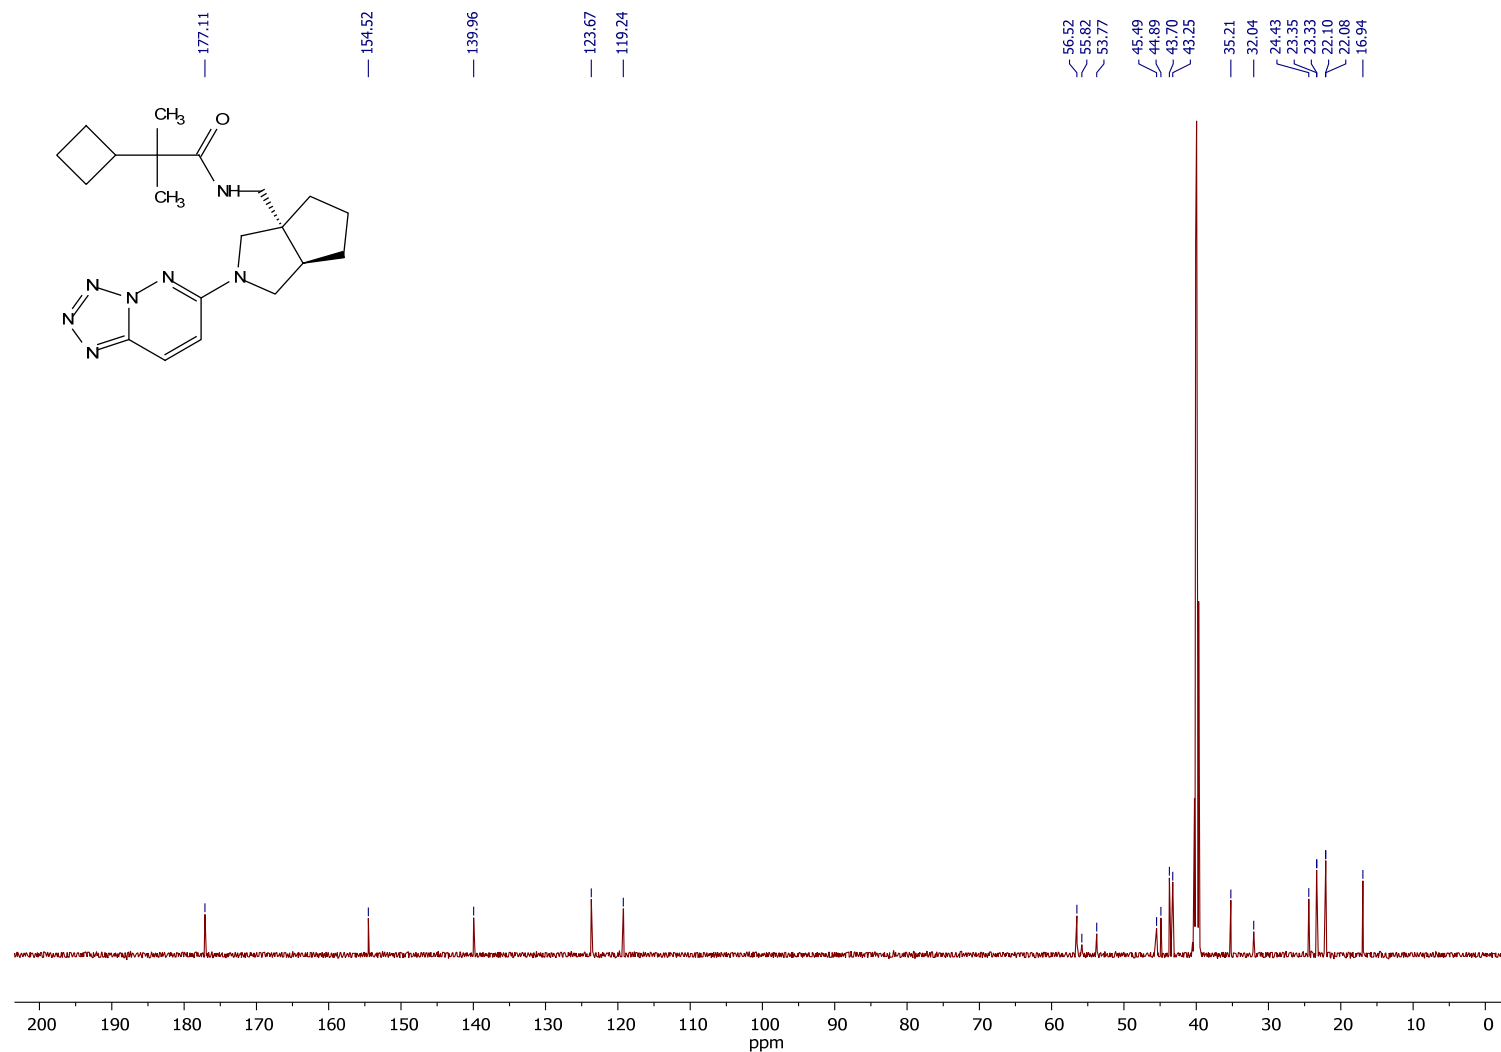

*rac*-2-Cyclobutyl-2-methyl-*N*-(((3*aR*,6*aS*)-2-(tetrazolo[1,5-*b*]pyridazin-6-yl)hexahydrocyclopenta[*c*]pyrrol-3*a*(1*H*)-yl)methyl)propanamide (**14**{19,35,369}), <sup>13</sup>C NMR (151 MHz, DMSO-*d*<sub>6</sub>)

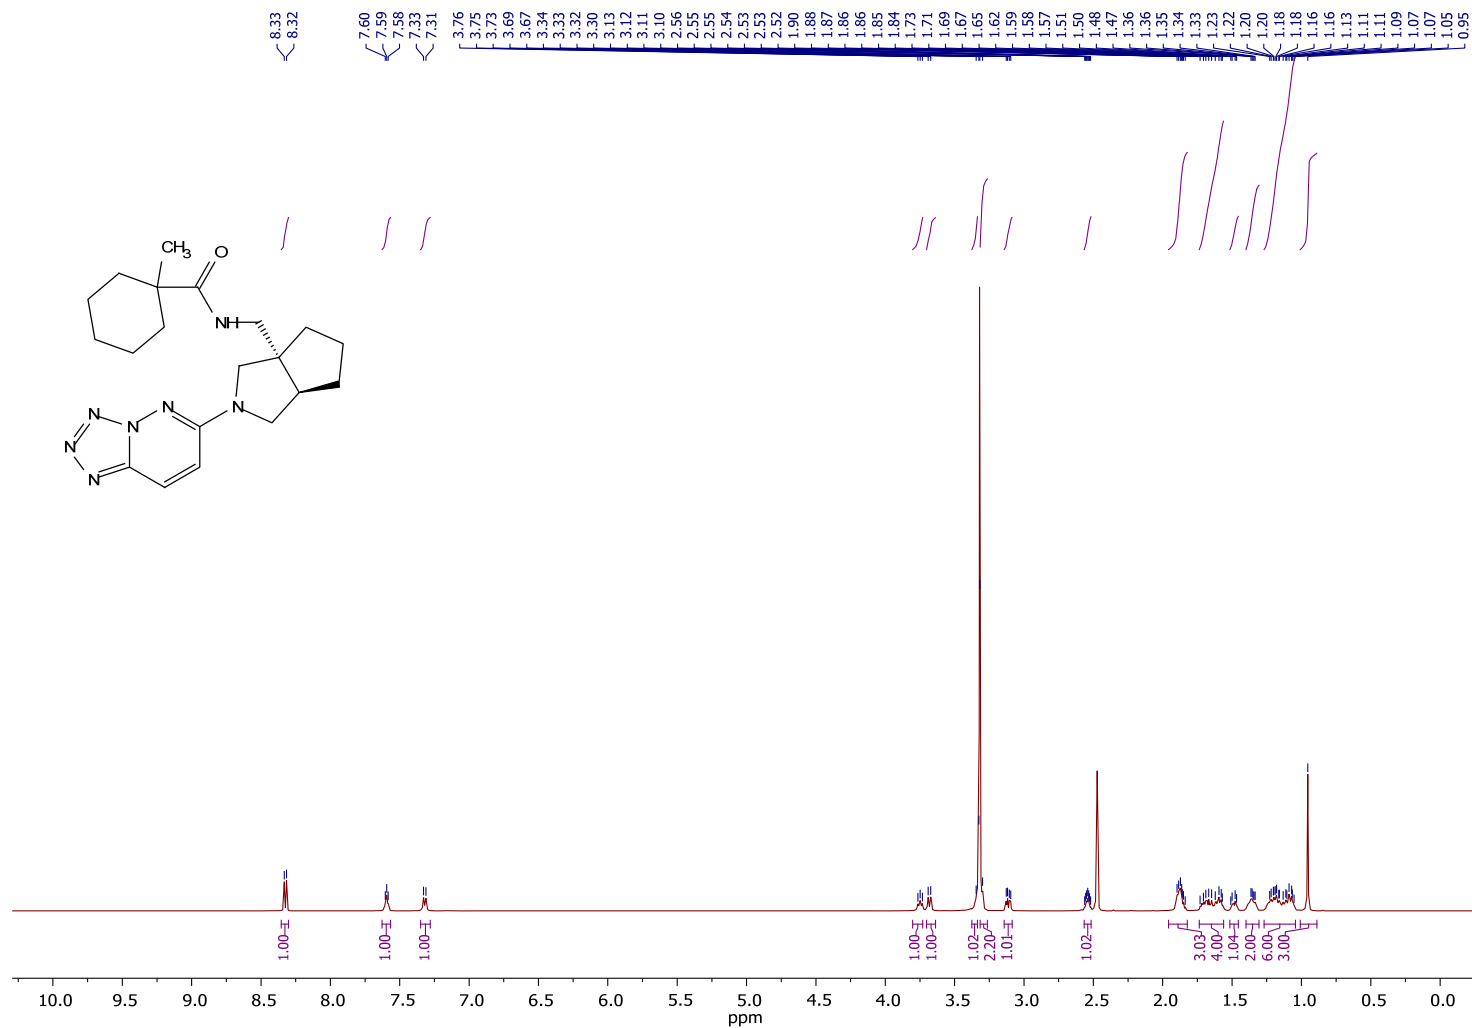

*rac*-1-Methyl-*N*-(((3*aR*,6*aS*)-2-(tetrazolo[1,5-*b*]pyridazin-6-yl)hexahydrocyclopenta[*c*]pyrrol-3*a*(1*H*)-yl)methyl)cyclohexane-1-carboxamide (**14**{19,35,373}), <sup>1</sup>H NMR (600 MHz, DMSO-*d*<sub>6</sub>)

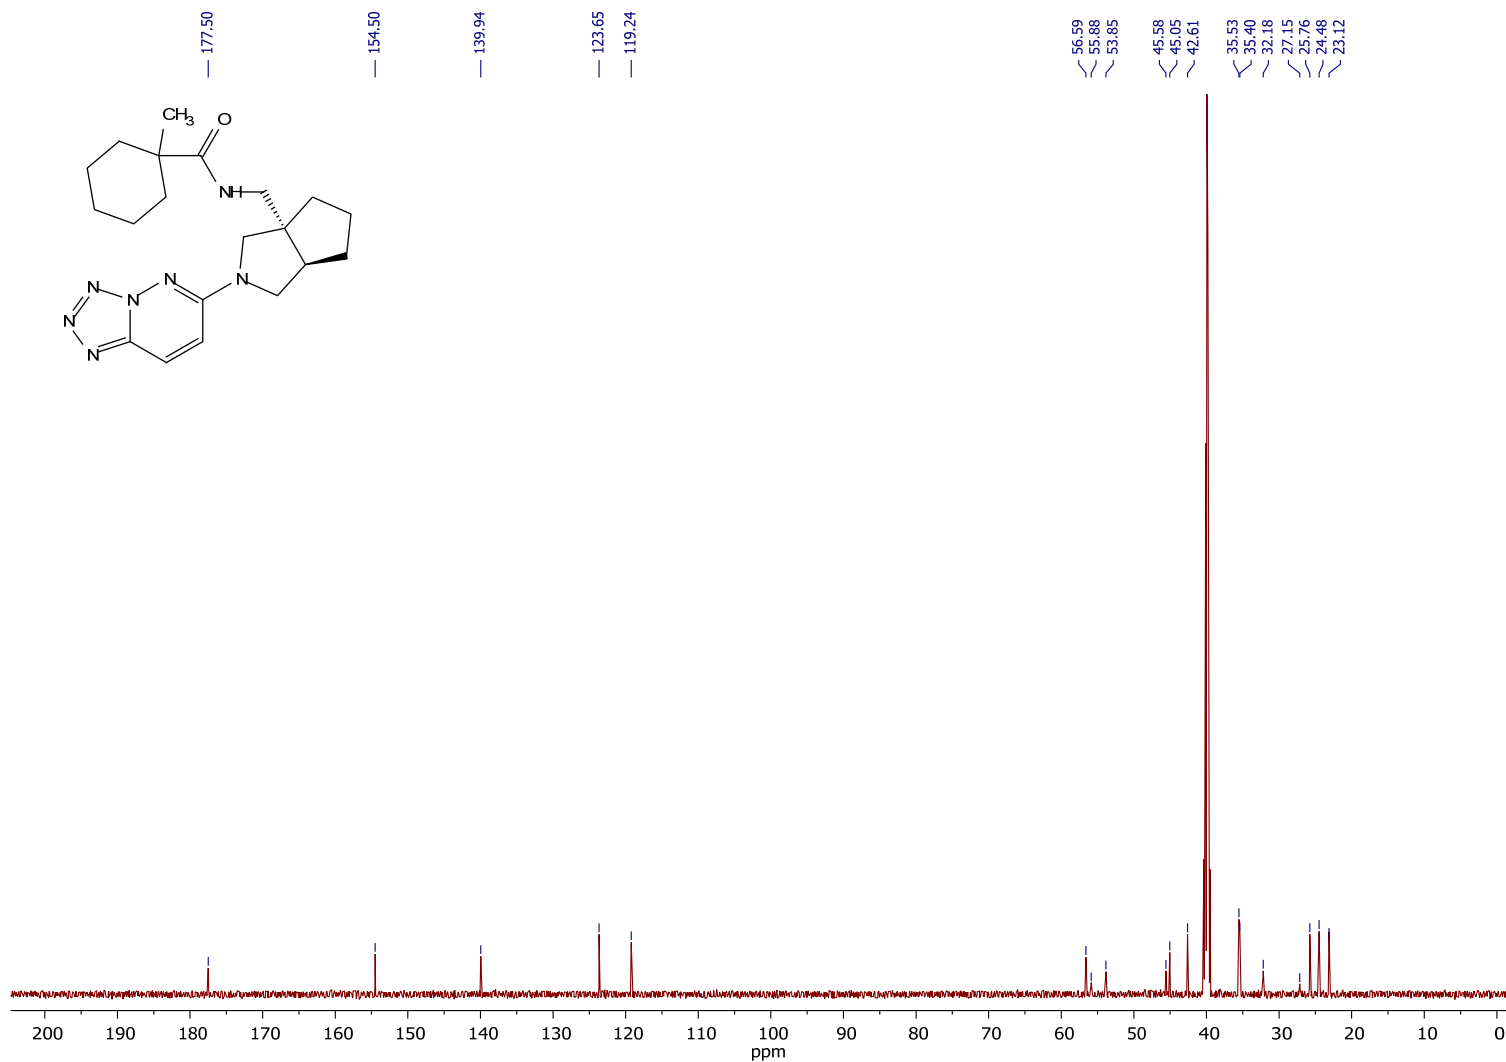

*rac*-1-Methyl-*N*-(((3*aR*,6*aS*)-2-(tetrazolo[1,5-*b*]pyridazin-6-yl)hexahydrocyclopenta[*c*]pyrrol-3*a*(1*H*)-yl)methyl)cyclohexane-1-carboxamide (**14**{19,35,373}), <sup>13</sup>C NMR (151 MHz, DMSO-*d*<sub>6</sub>)

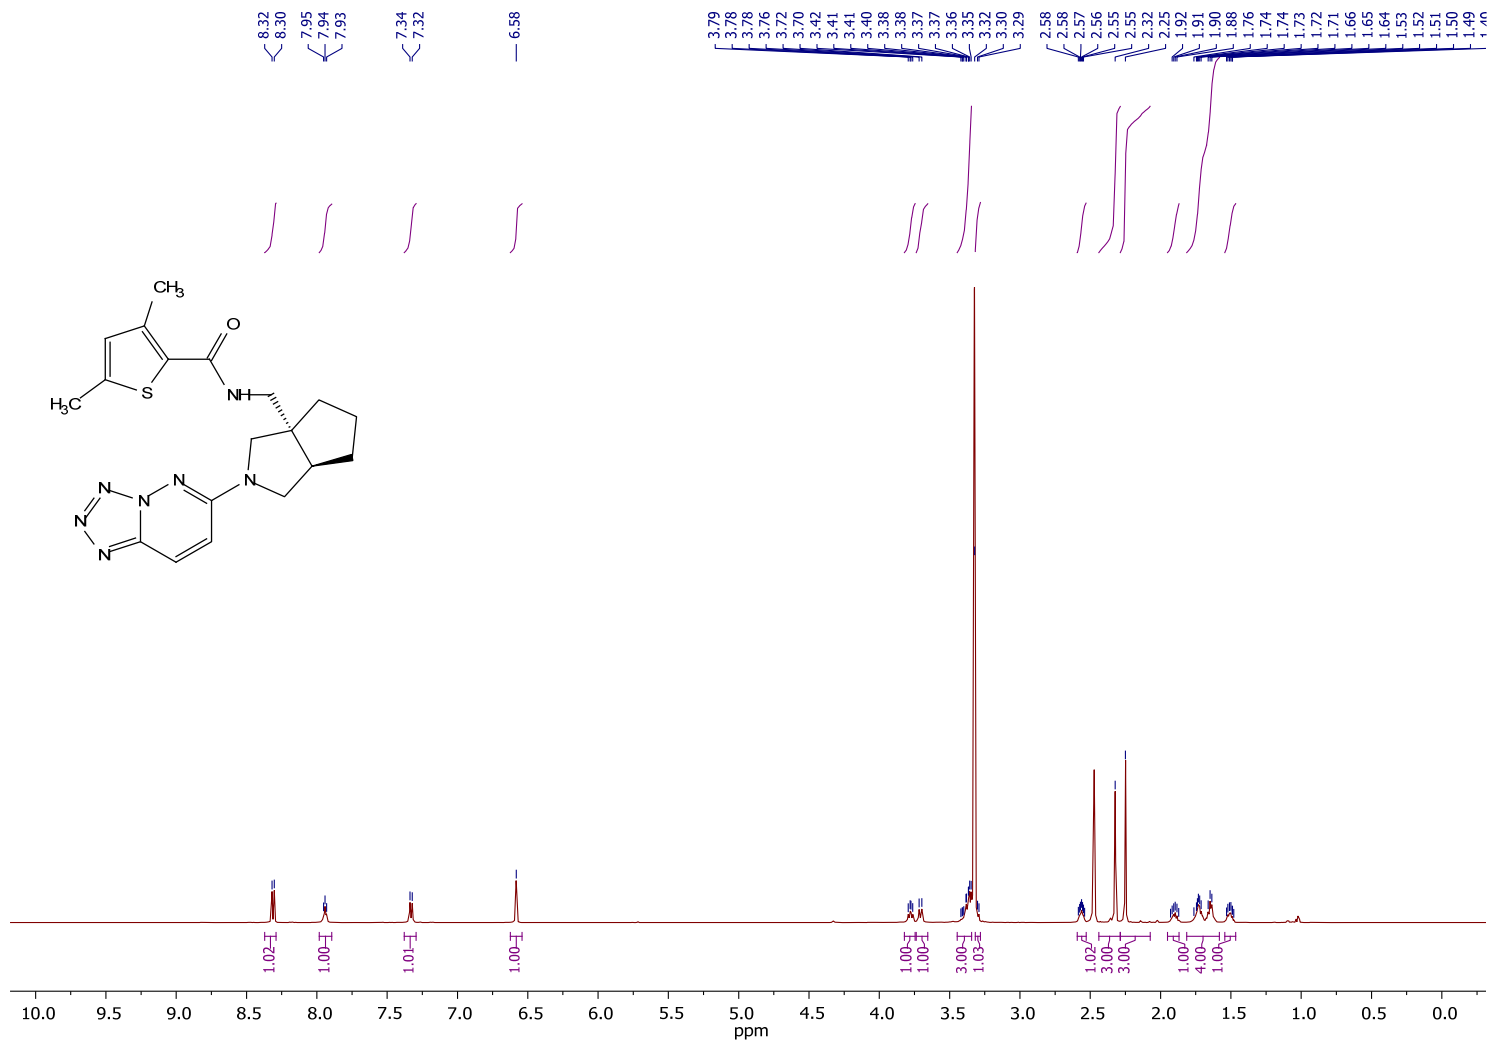

*rac*-3,5-Dimethyl-*N*-(((3*aR*,6*aS*)-2-(tetrazolo[1,5-*b*]pyridazin-6-yl)octahydrocyclopenta[*c*]pyrrol-3*a*-yl)methyl)thiophene-2-carboxamide (**14**{19,35,375}), <sup>1</sup>H NMR (600 MHz, DMSO-*d*<sub>6</sub>)

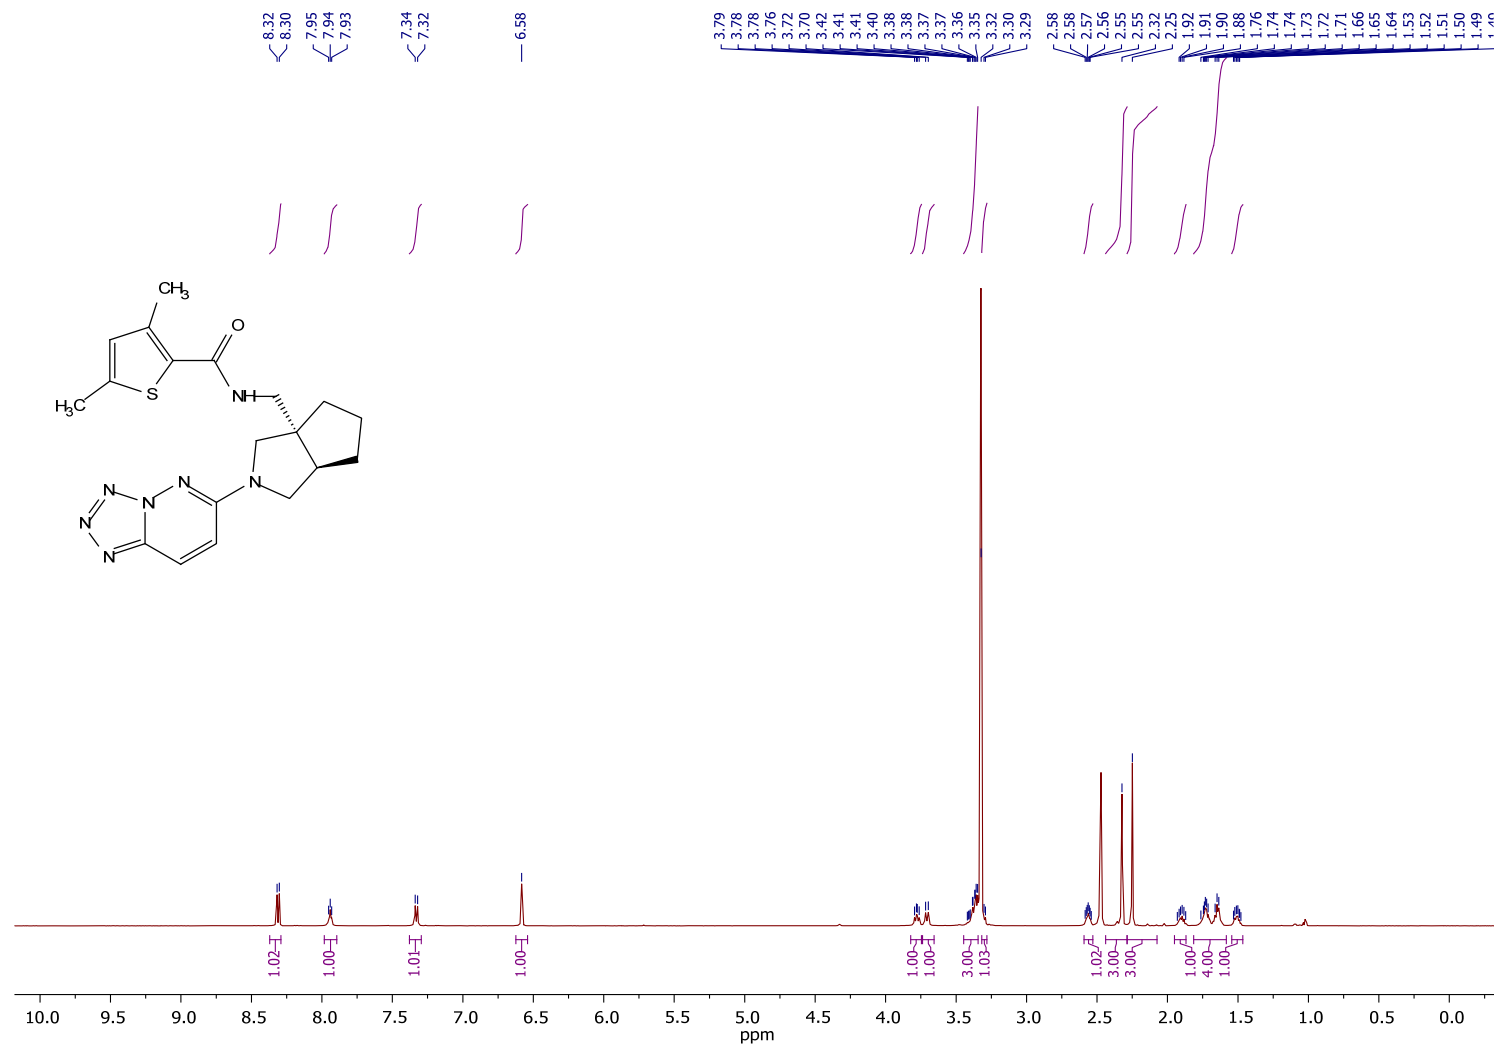

*rac*-3,5-Dimethyl-*N*-(((3*aR*,6*aS*)-2-(tetrazolo[1,5-*b*]pyridazin-6-yl)octahydrocyclopenta[*c*]pyrrol-3*a*-yl)methyl)thiophene-2-carboxamide (**14**{19,35,375}),  $^{13}\text{C}$  NMR (151 MHz, DMSO- $d_6$ )

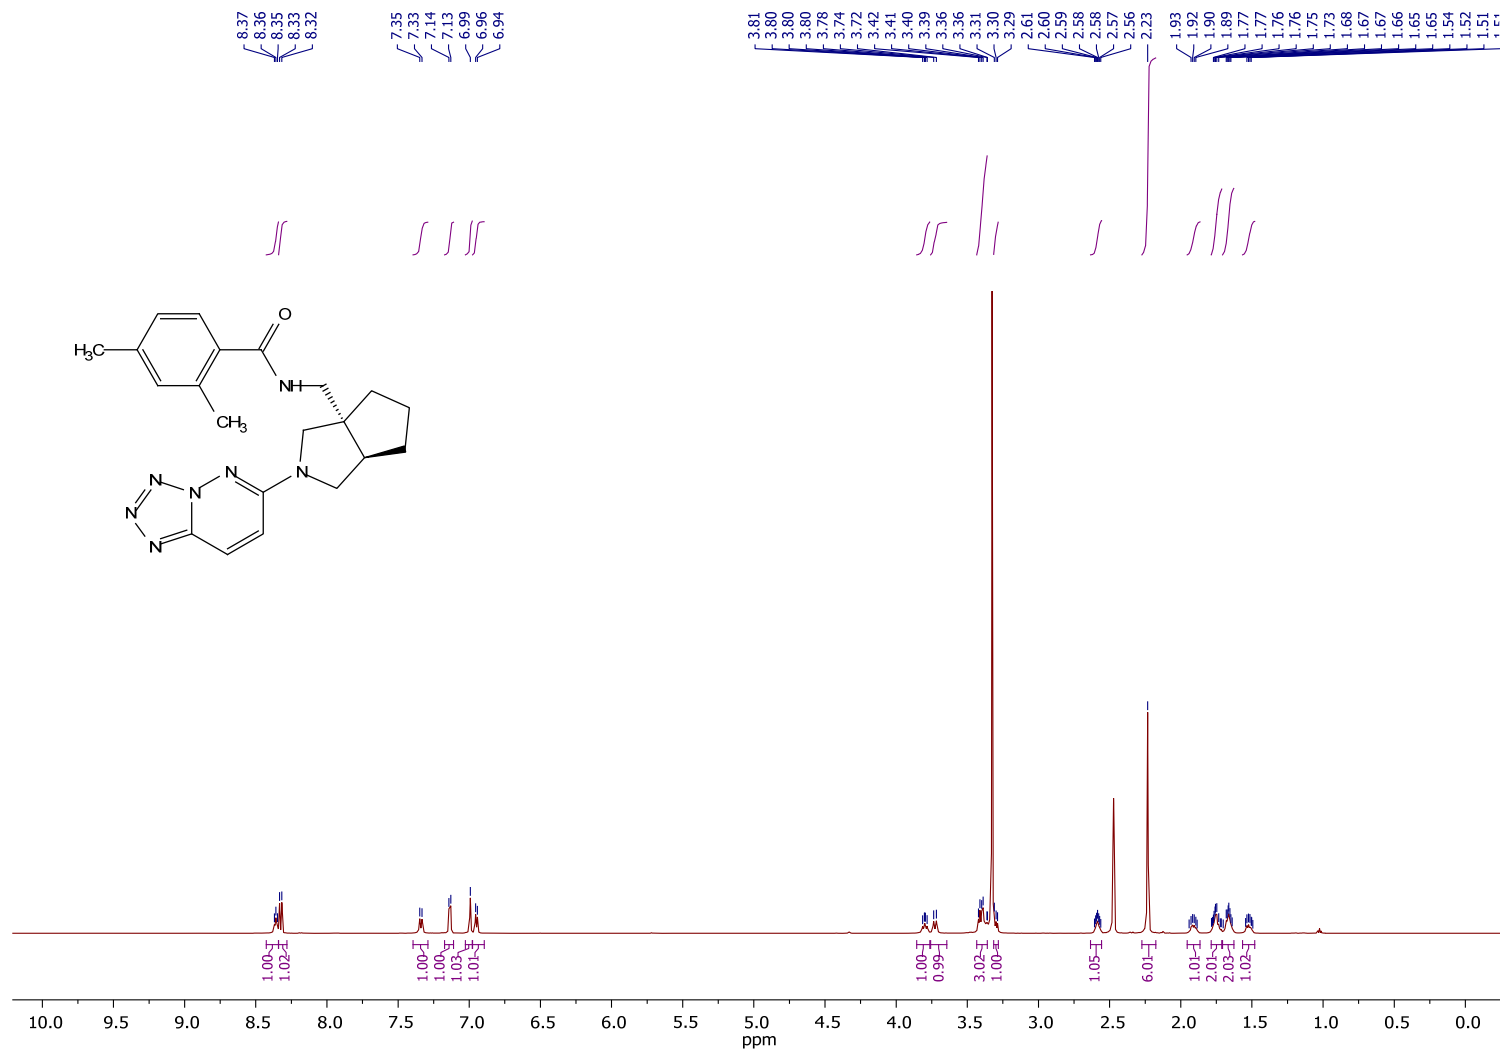

*rac*-2,4-Dimethyl-*N*-(((3*aR*,6*aS*)-2-(tetrazolo[1,5-*b*]pyridazin-6-yl)octahydrocyclopenta[*c*]pyrrol-3*a*-yl)methyl)benzamide (**14**{19,35,377}),  
<sup>1</sup>H NMR (600 MHz, DMSO-*d*<sub>6</sub>)

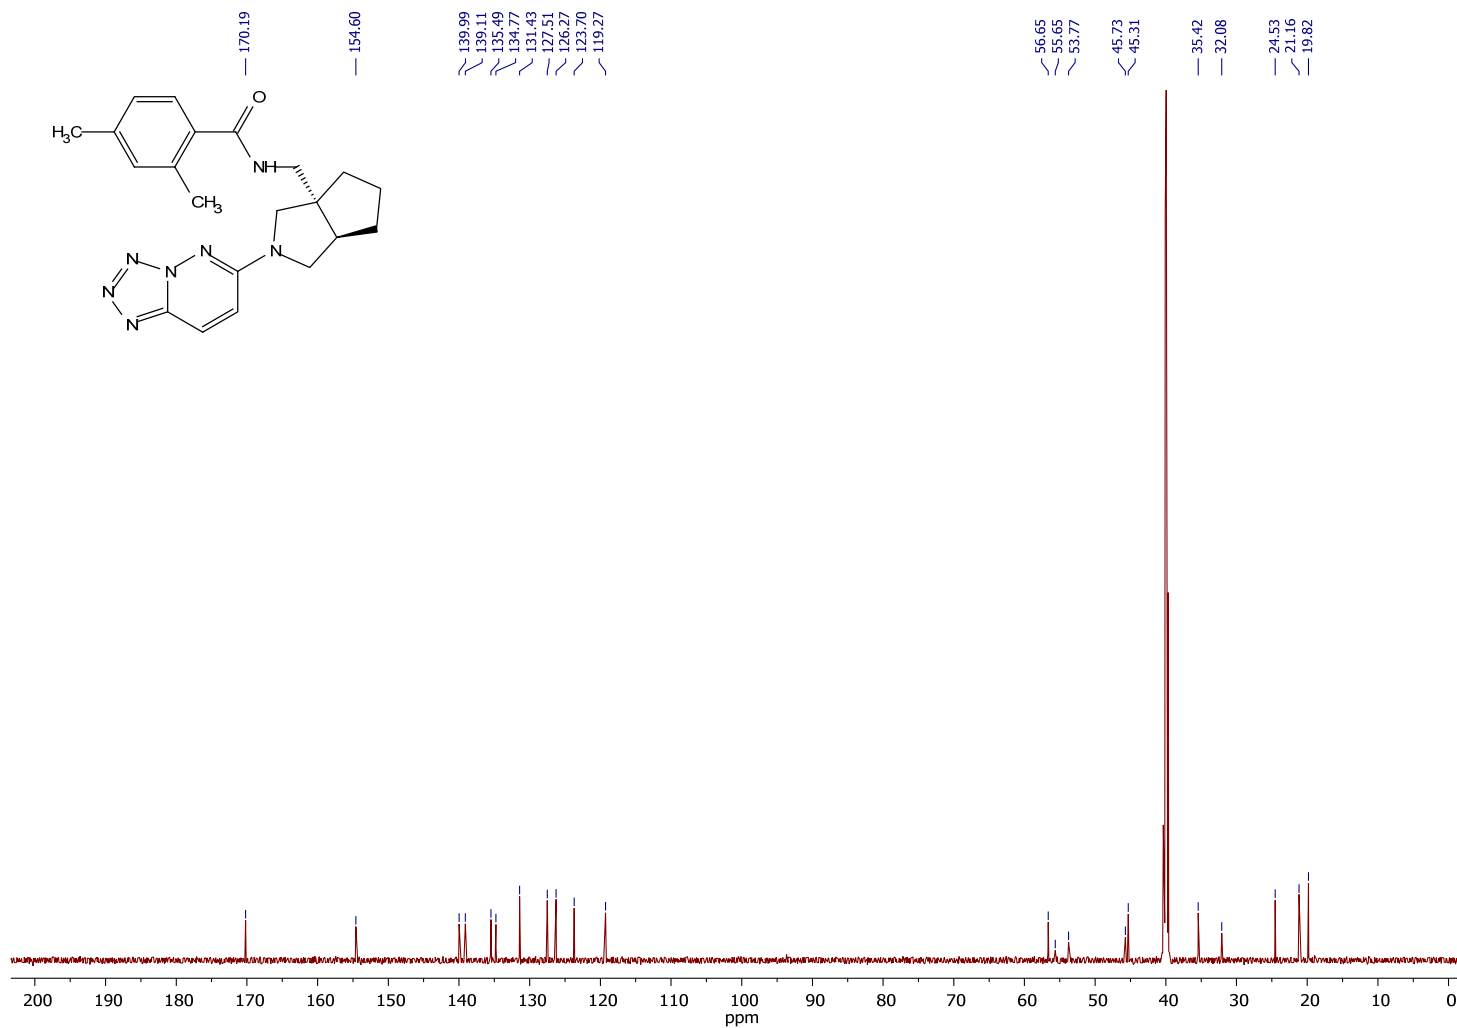

*rac*-2,4-Dimethyl-N-(((3aR,6aS)-2-(tetrazolo[1,5-*b*]pyridazin-6-yl)octahydrocyclopenta[*c*]pyrrol-3a-yl)methyl)benzamide (**14**{19,35,377}),  $^{13}\text{C}$  NMR (151 MHz, DMSO-*d*<sub>6</sub>)



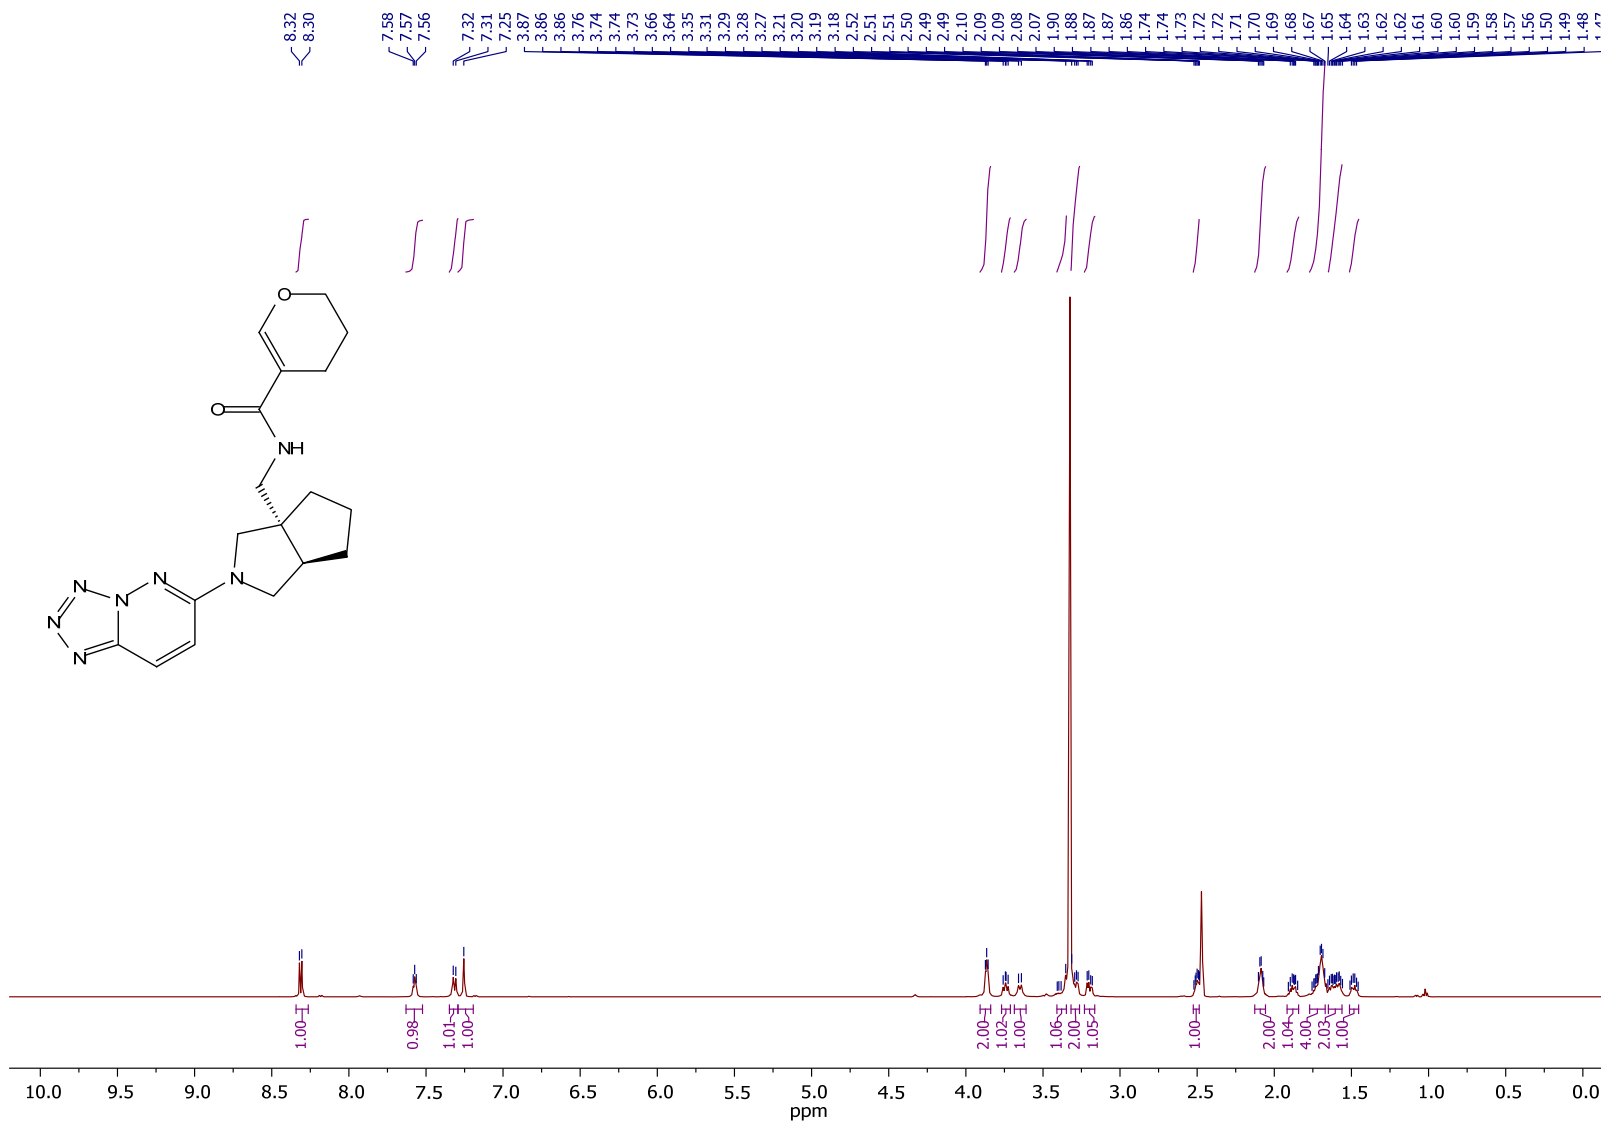

*N*-(((3*aS*,6*aR*)-2-(tetrazolo[1,5-*b*]pyridazin-6-yl)octahydrocyclopenta[*c*]pyrrol-3*a*-yl)methyl)-3,4-dihydro-2*H*-pyran-5-carboxamide (**14**{19,35,378}),  
<sup>1</sup>H NMR (600 MHz, DMSO-*d*<sub>6</sub>)

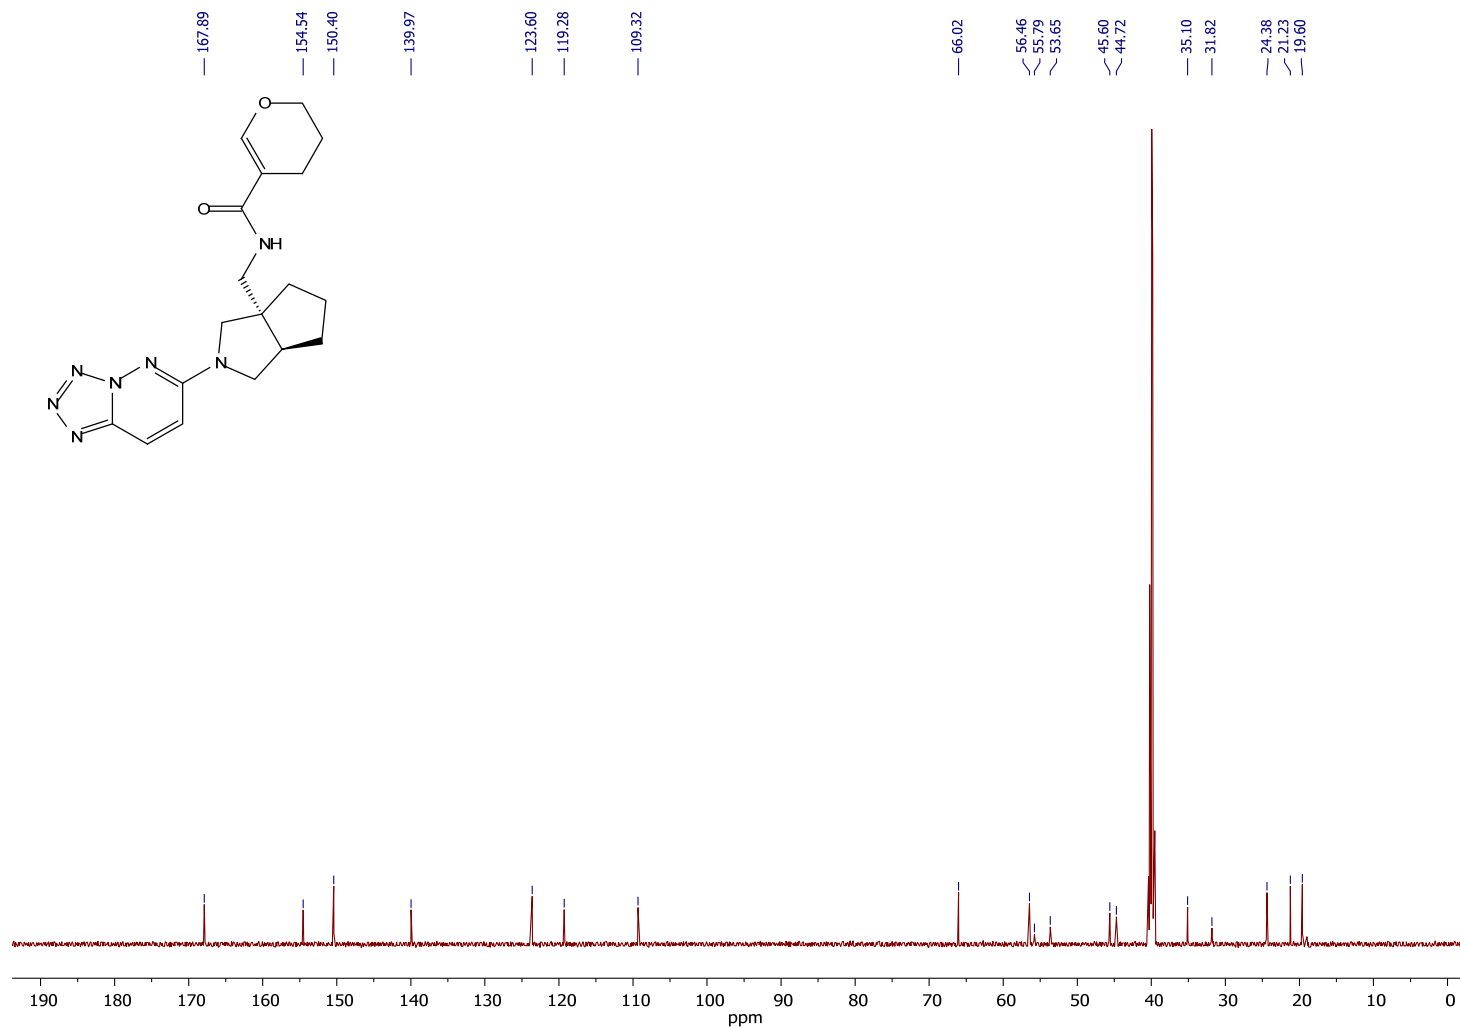

*N*-(((3*aS*,6*aR*)-2-(tetrazolo[1,5-*b*]pyridazin-6-yl)octahydrocyclopenta[*c*]pyrrol-3*a*-yl)methyl)-3,4-dihydro-2*H*-pyran-5-carboxamide (**14**{19,35,378}),  
<sup>13</sup>C NMR (151 MHz, DMSO-*d*<sub>6</sub>)

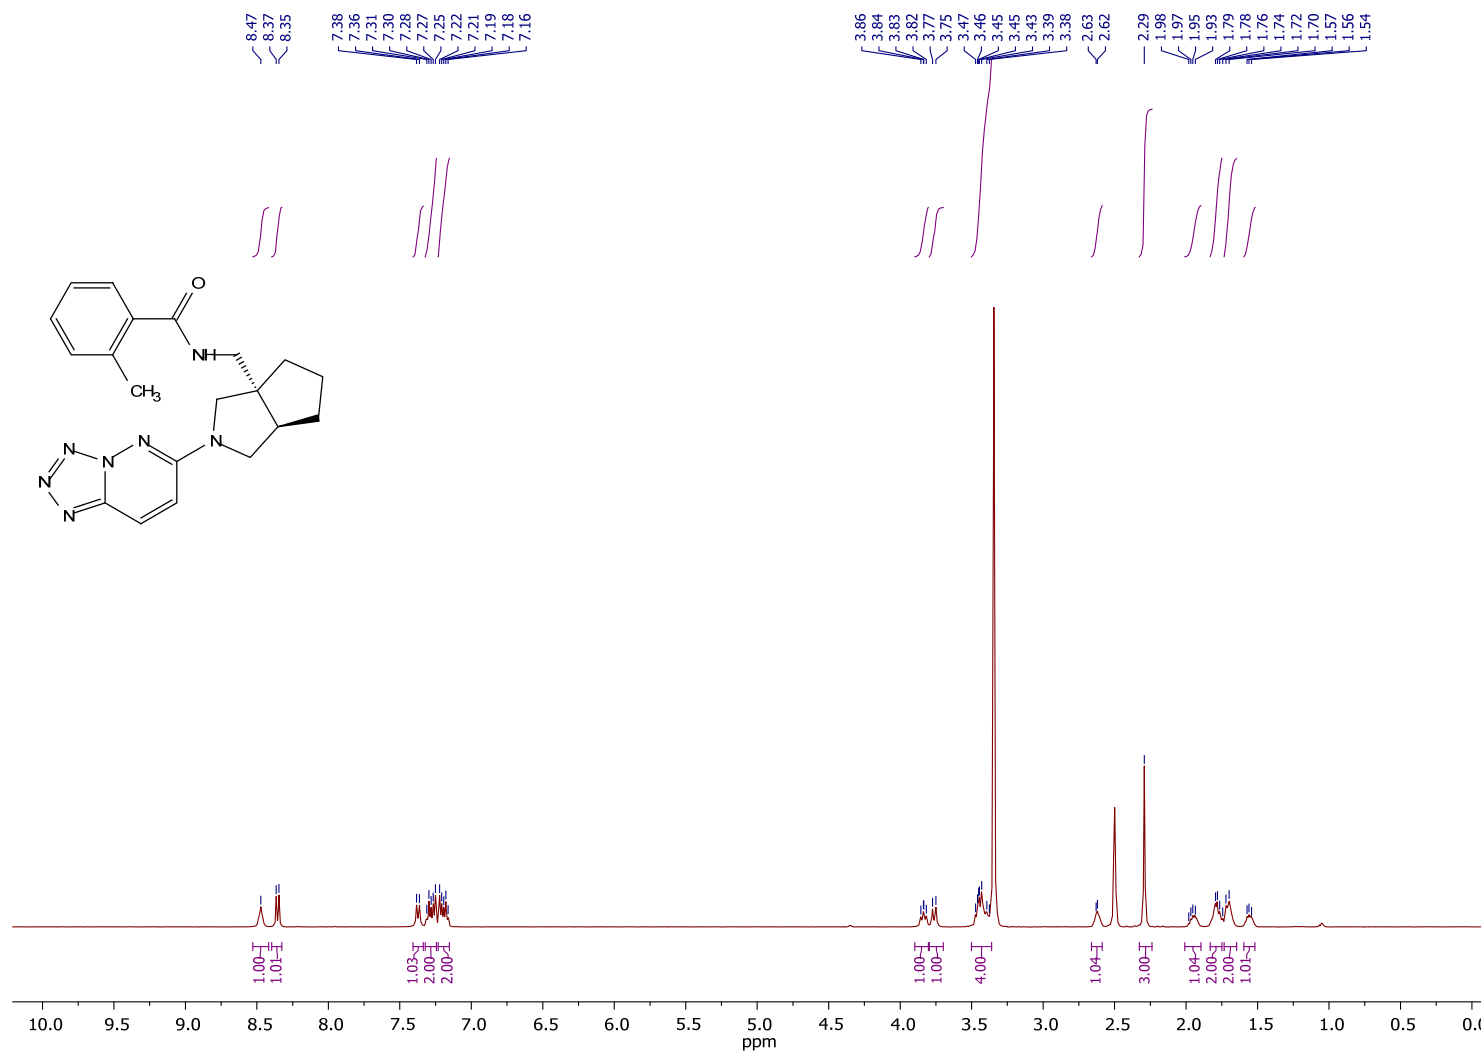

*rac*-2-Methyl-*N*-(((3*aR*,6*aS*)-2-(tetrazolo[1,5-*b*]pyridazin-6-yl)octahydrocyclopenta[*c*]pyrrol-3*a*-yl)methyl)benzamide (**14**{19,35,384}),  
<sup>1</sup>H NMR (500 MHz, DMSO-*d*<sub>6</sub>)

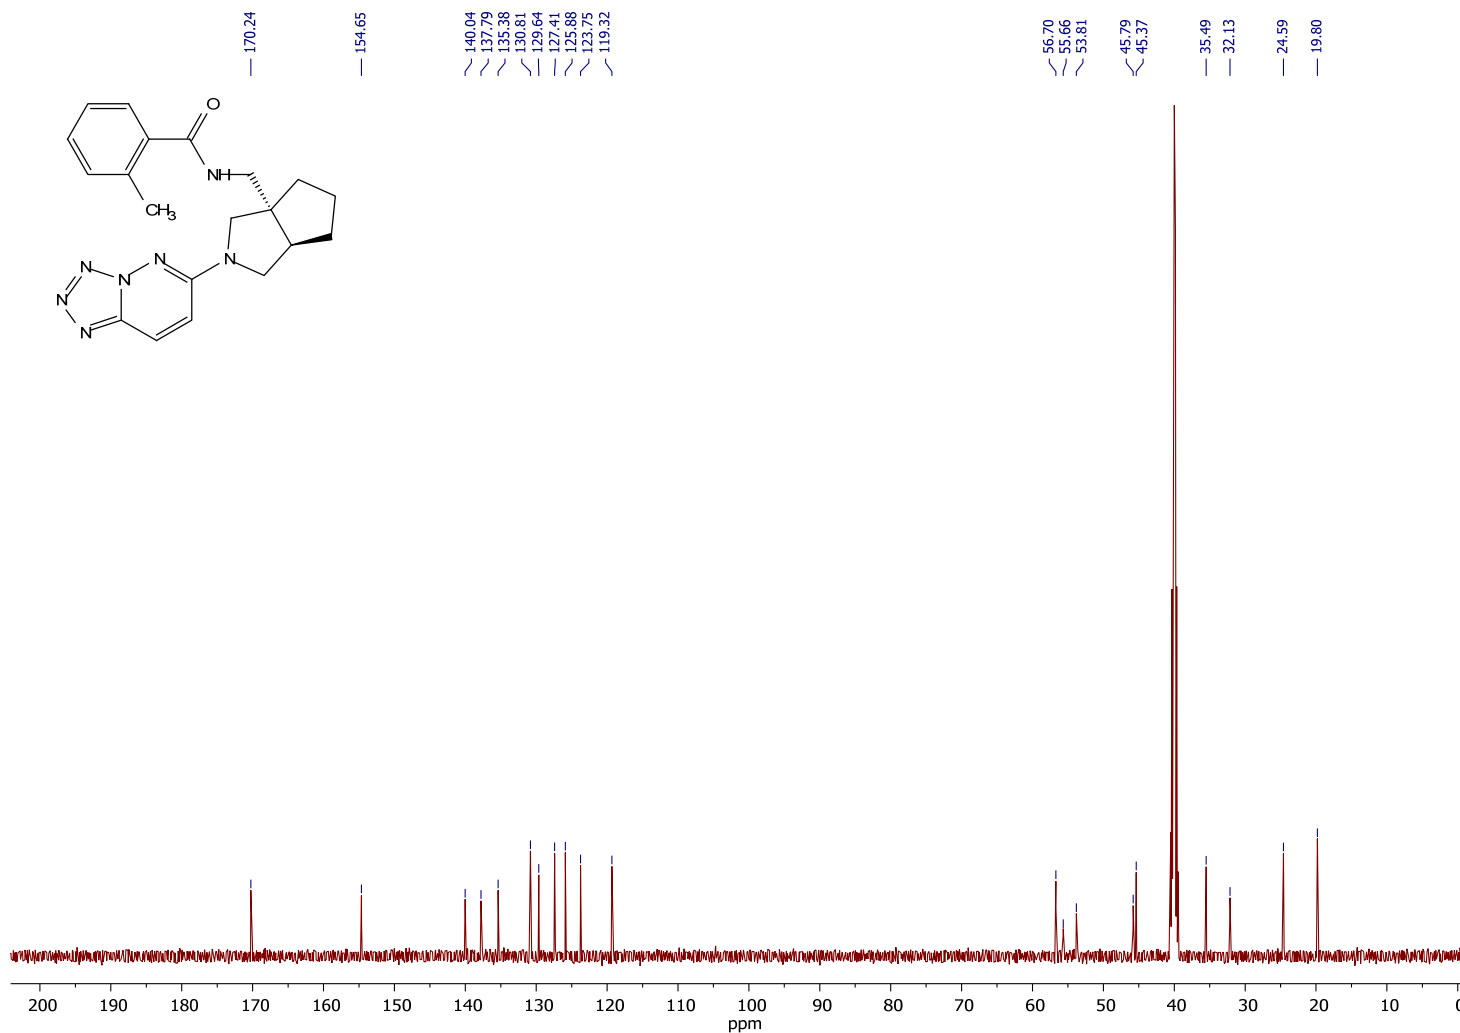

*rac*-2-Methyl-*N*-(((3*aR*,6*aS*)-2-(tetrazolo[1,5-*b*]pyridazin-6-yl)octahydrocyclopenta[*c*]pyrrol-3*a*-yl)methyl)benzamide (**14**{19,35,384}),  
<sup>13</sup>C NMR (126 MHz, DMSO-*d*<sub>6</sub>)

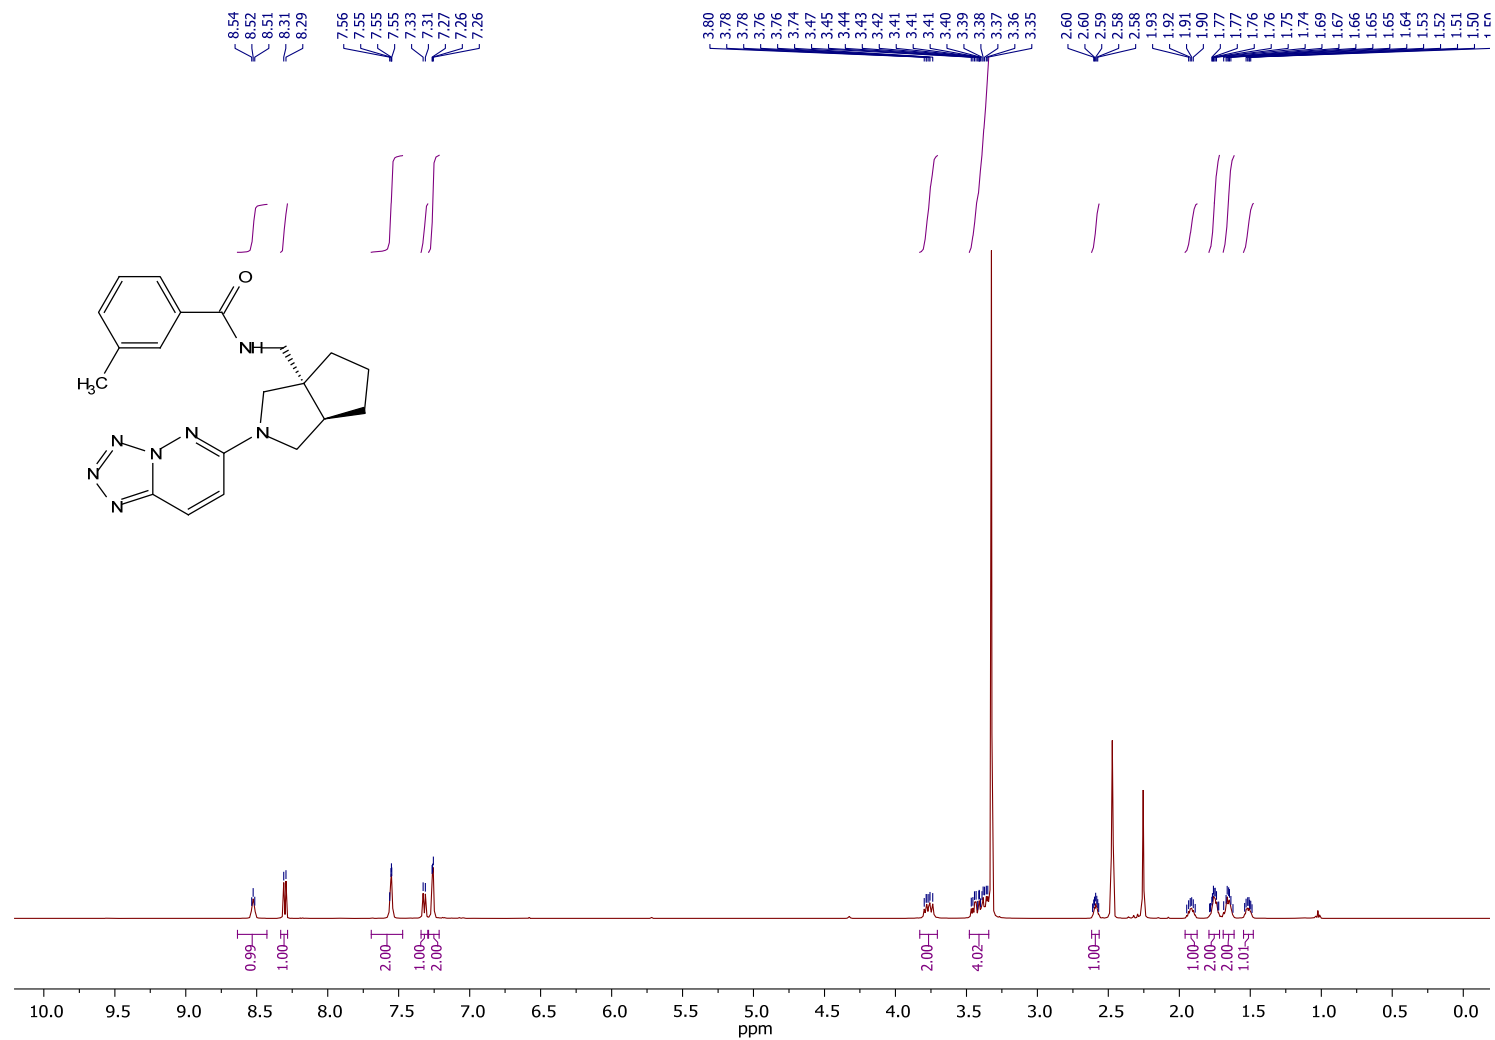

*rac*-3-Methyl-*N*-(((3*aR*,6*aS*)-2-(tetrazolo[1,5-*b*]pyridazin-6-yl)octahydrocyclopenta[*c*]pyrrol-3*a*-yl)methyl)benzamide (**14**{19,35,171}),  
<sup>1</sup>H NMR (600 MHz, DMSO-*d*<sub>6</sub>)

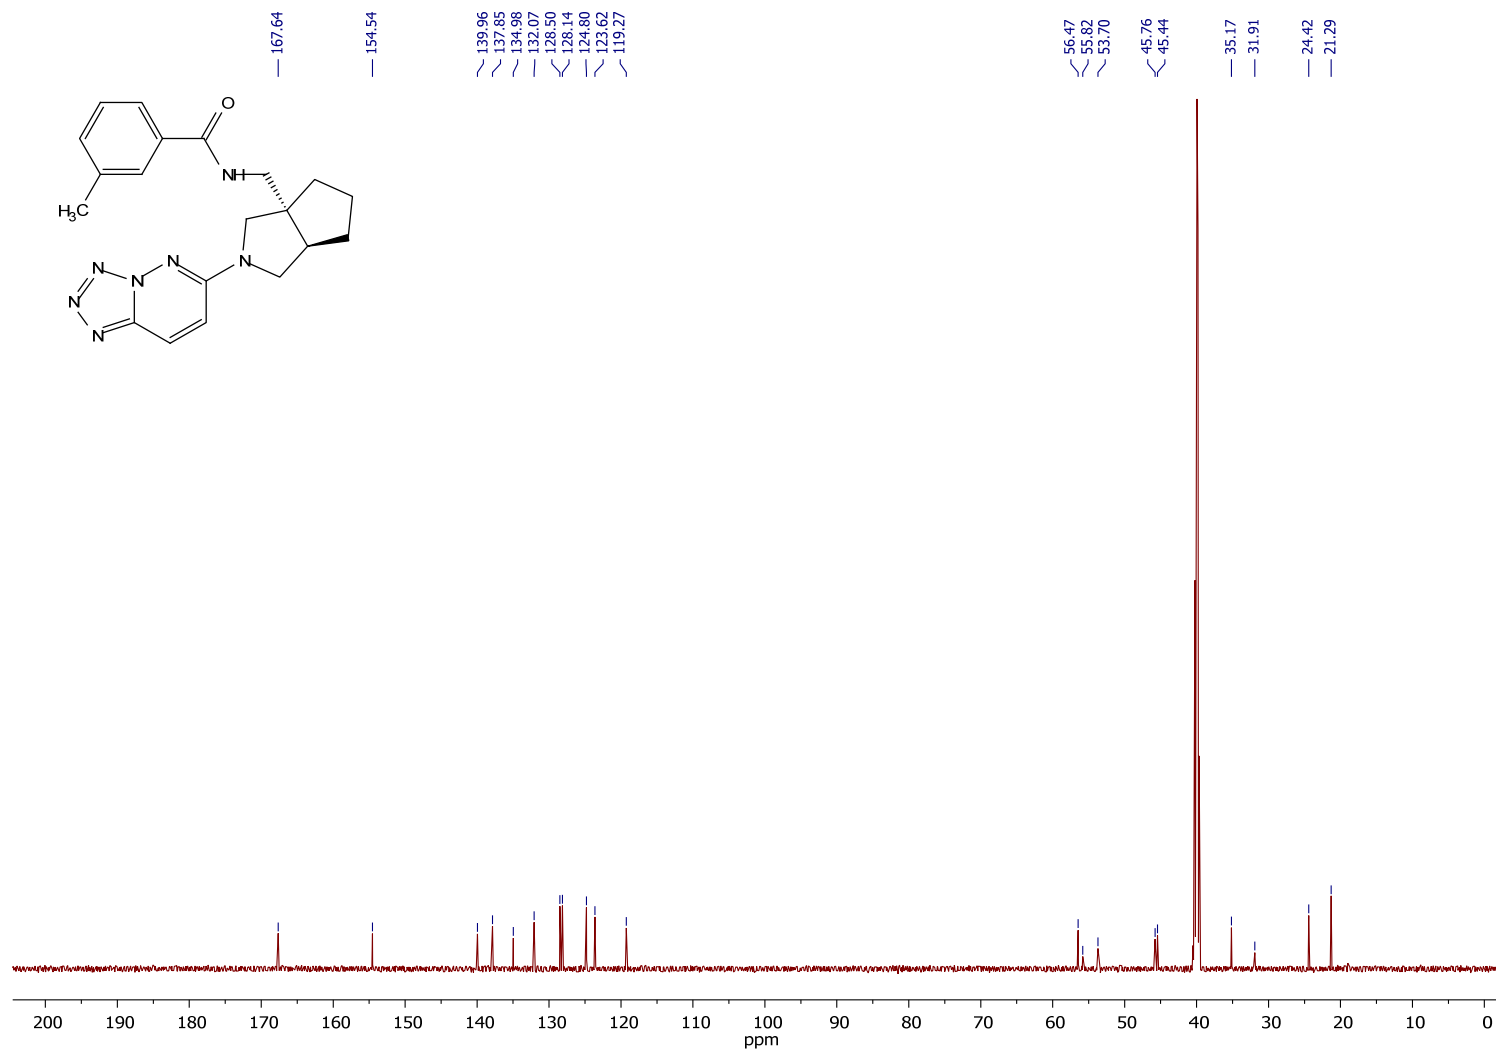

*rac*-3-Methyl-*N*-(((3*aR*,6*aS*)-2-(tetrazolo[1,5-*b*]pyridazin-6-yl)octahydrocyclopenta[*c*]pyrrol-3*a*-yl)methyl)benzamide (**14**{19,35,171}),  $^{13}\text{C}$  NMR (151 MHz, DMSO- $d_6$ )

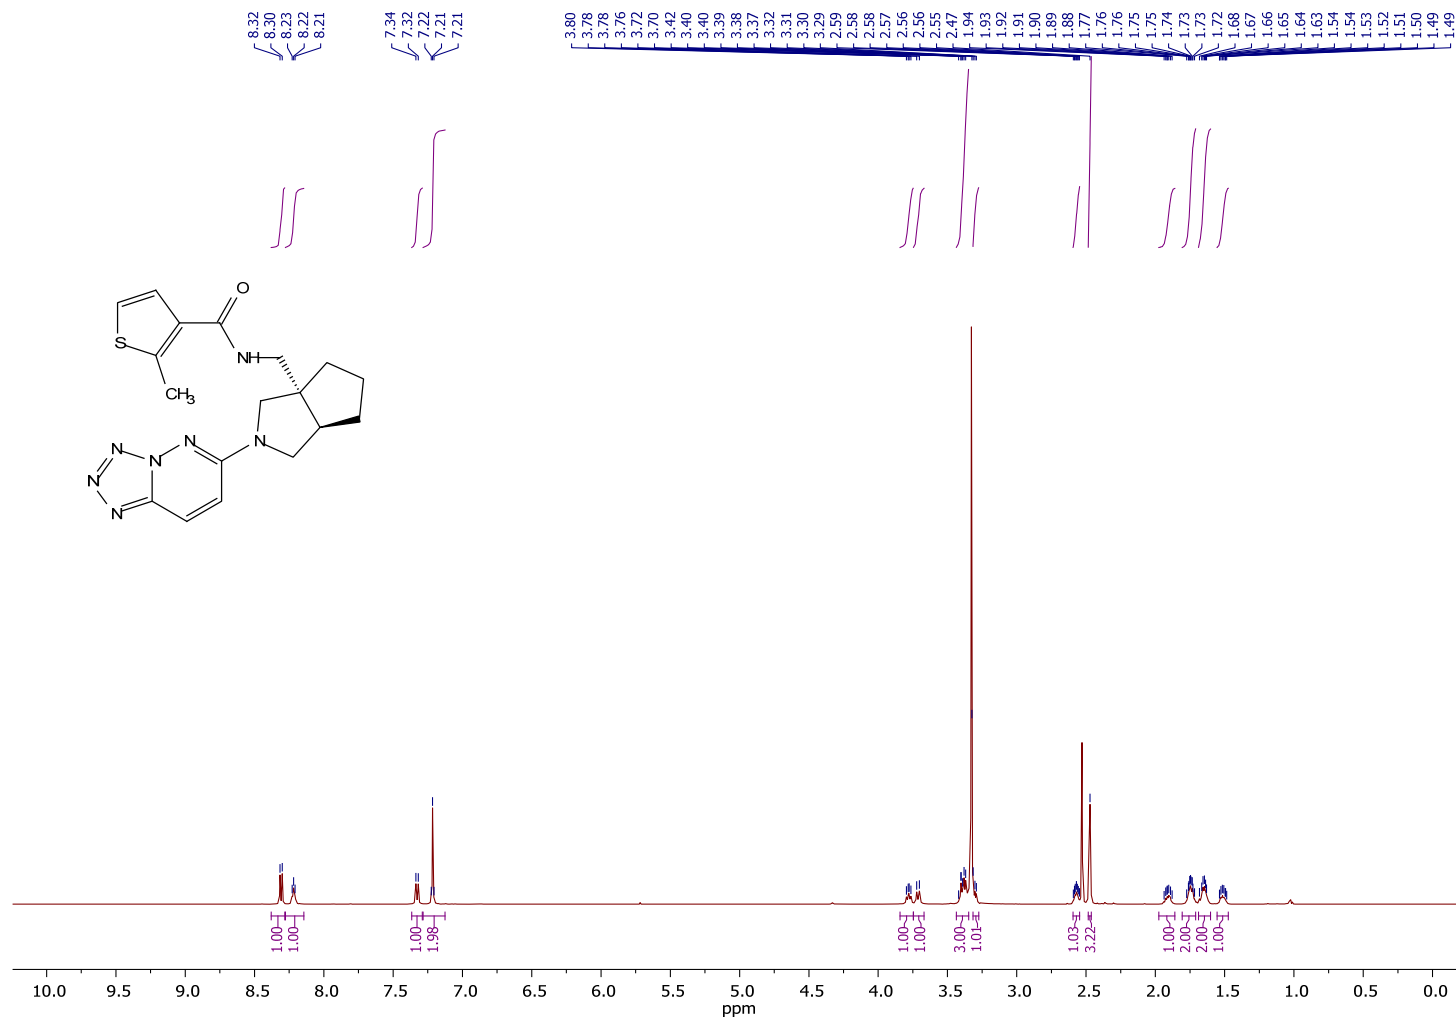

*rac*-2-Methyl-*N*-(((3*aR*,6*aS*)-2-(tetrazolo[1,5-*b*]pyridazin-6-yl)octahydrocyclopenta[*c*]pyrrol-3*a*-yl)methyl)thiophene-3-carboxamide  
**14**{19,35,390}, <sup>1</sup>H NMR (600 MHz, DMSO-*d*<sub>6</sub>)

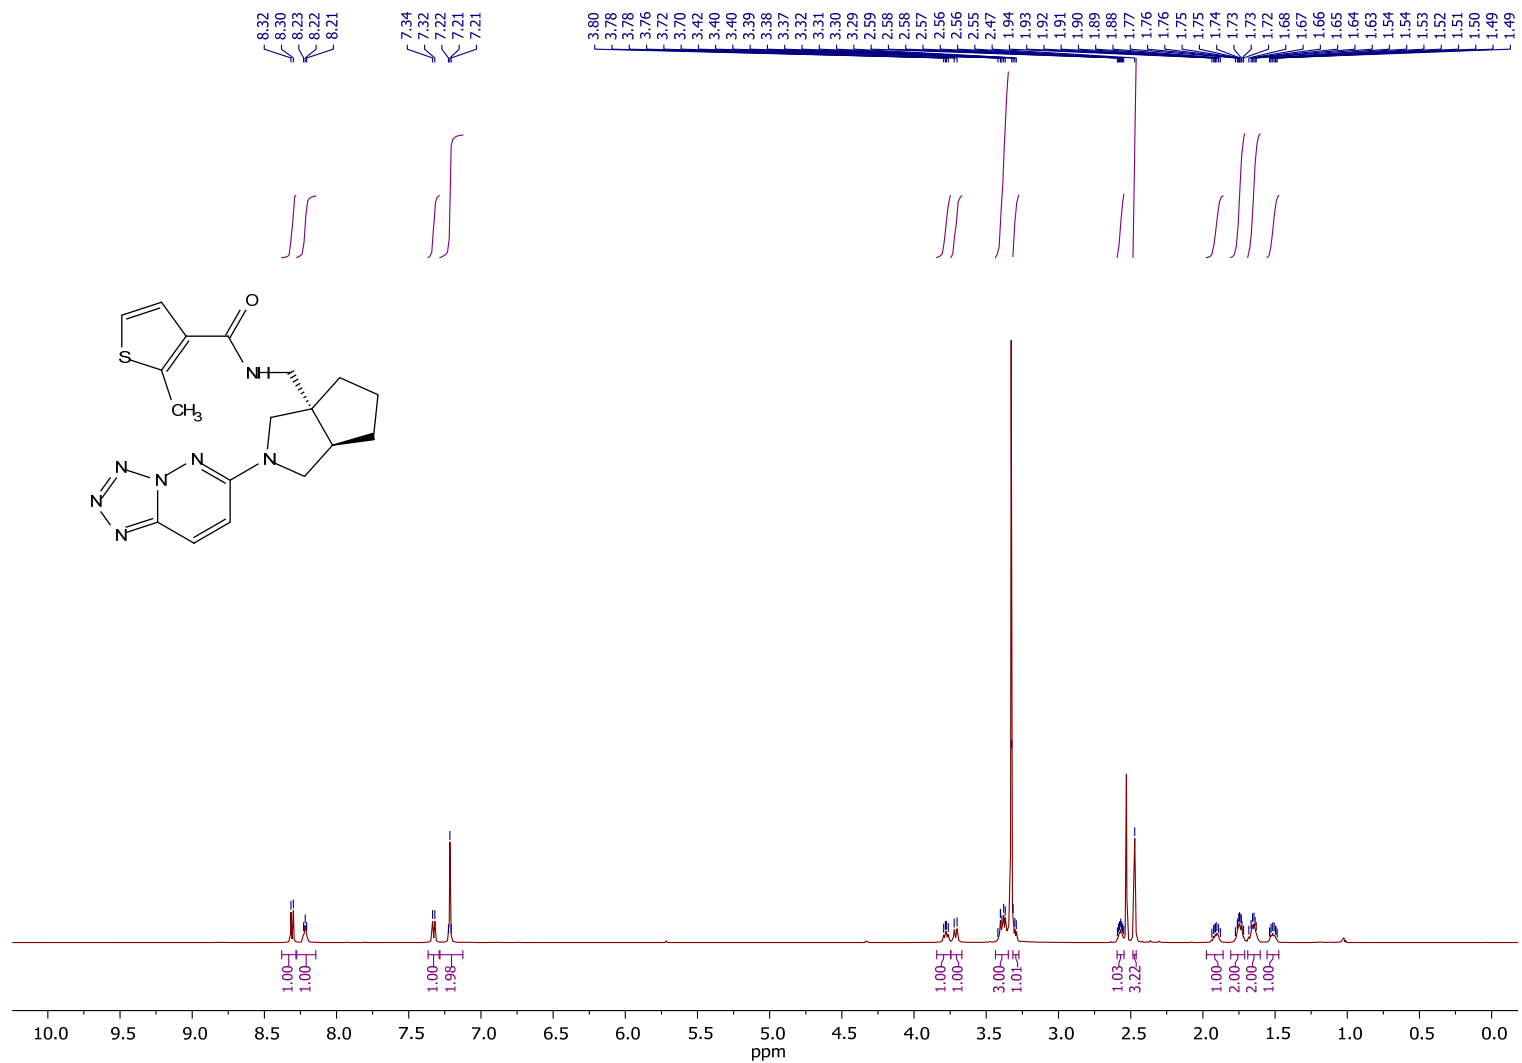

*rac*-2-Methyl-*N*-(((3*aR*,6*aS*)-2-(tetrazolo[1,5-*b*]pyridazin-6-yl)octahydrocyclopenta[*c*]pyrrol-3*a*-yl)methyl)thiophene-3-carboxamide **14**{19,35,390},  
<sup>13</sup>C NMR (151 MHz, DMSO-*d*<sub>6</sub>)



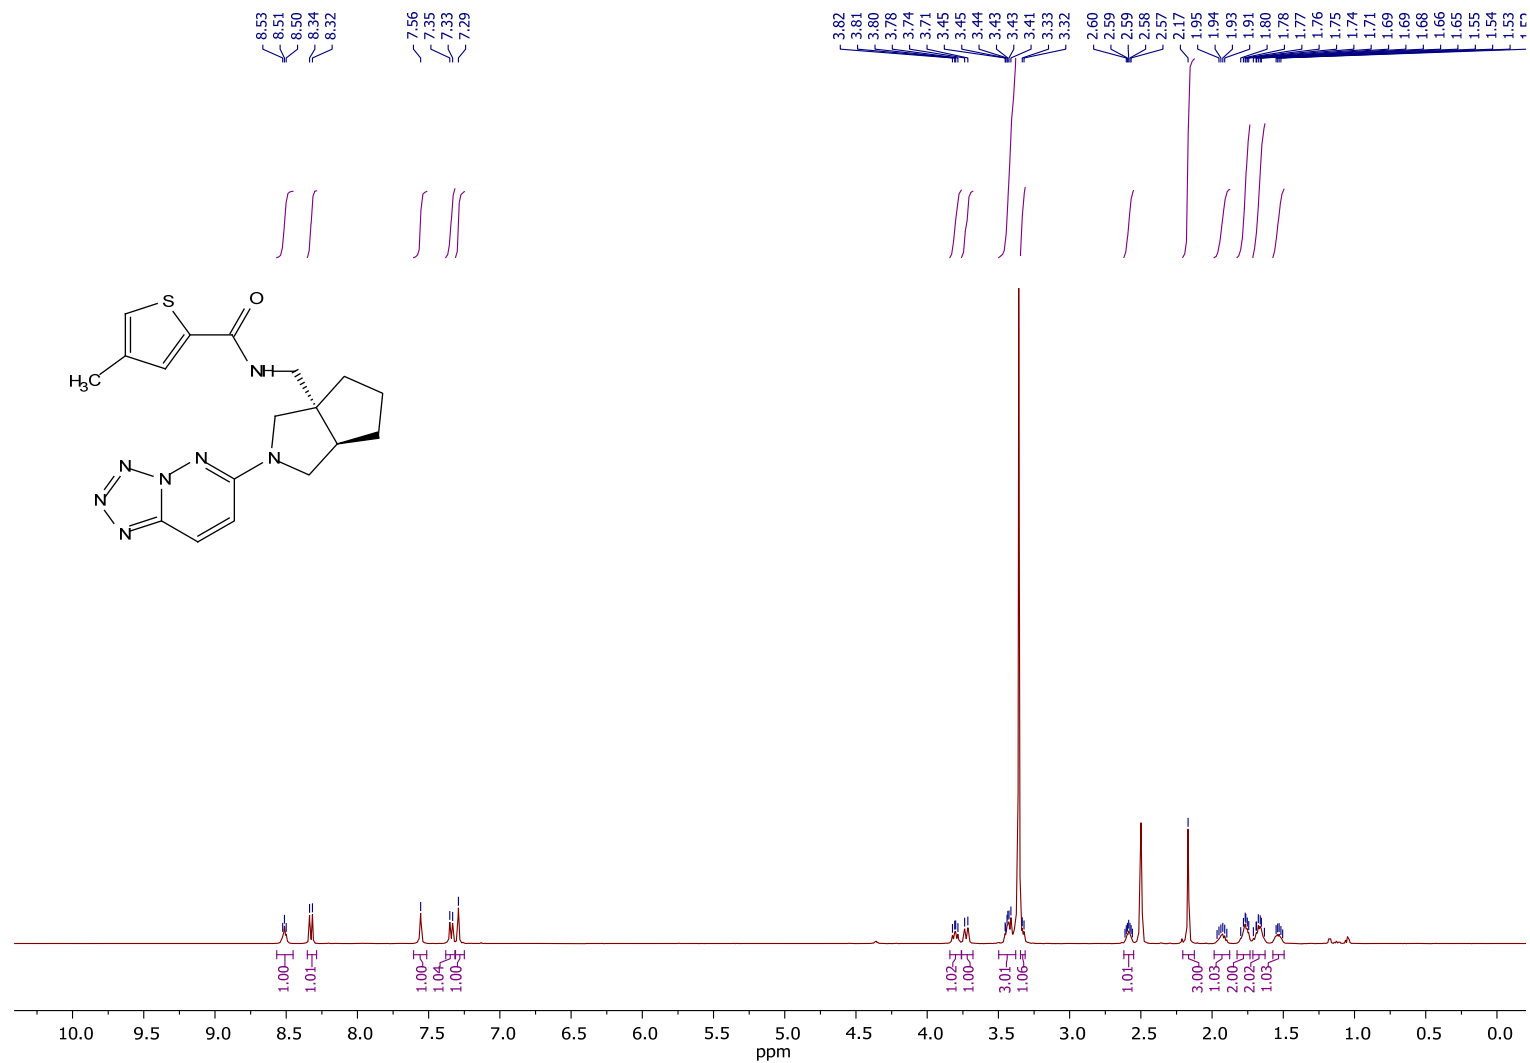

*rac*-4-Methyl-*N*-(((3*aR*,6*aS*)-2-(tetrazolo[1,5-*b*]pyridazin-6-yl)octahydrocyclopenta[*c*]pyrrol-3*a*-yl)methyl)thiophene-2-carboxamide (**14**{19,35,394}),  
<sup>1</sup>H NMR (500 MHz, DMSO-*d*<sub>6</sub>)

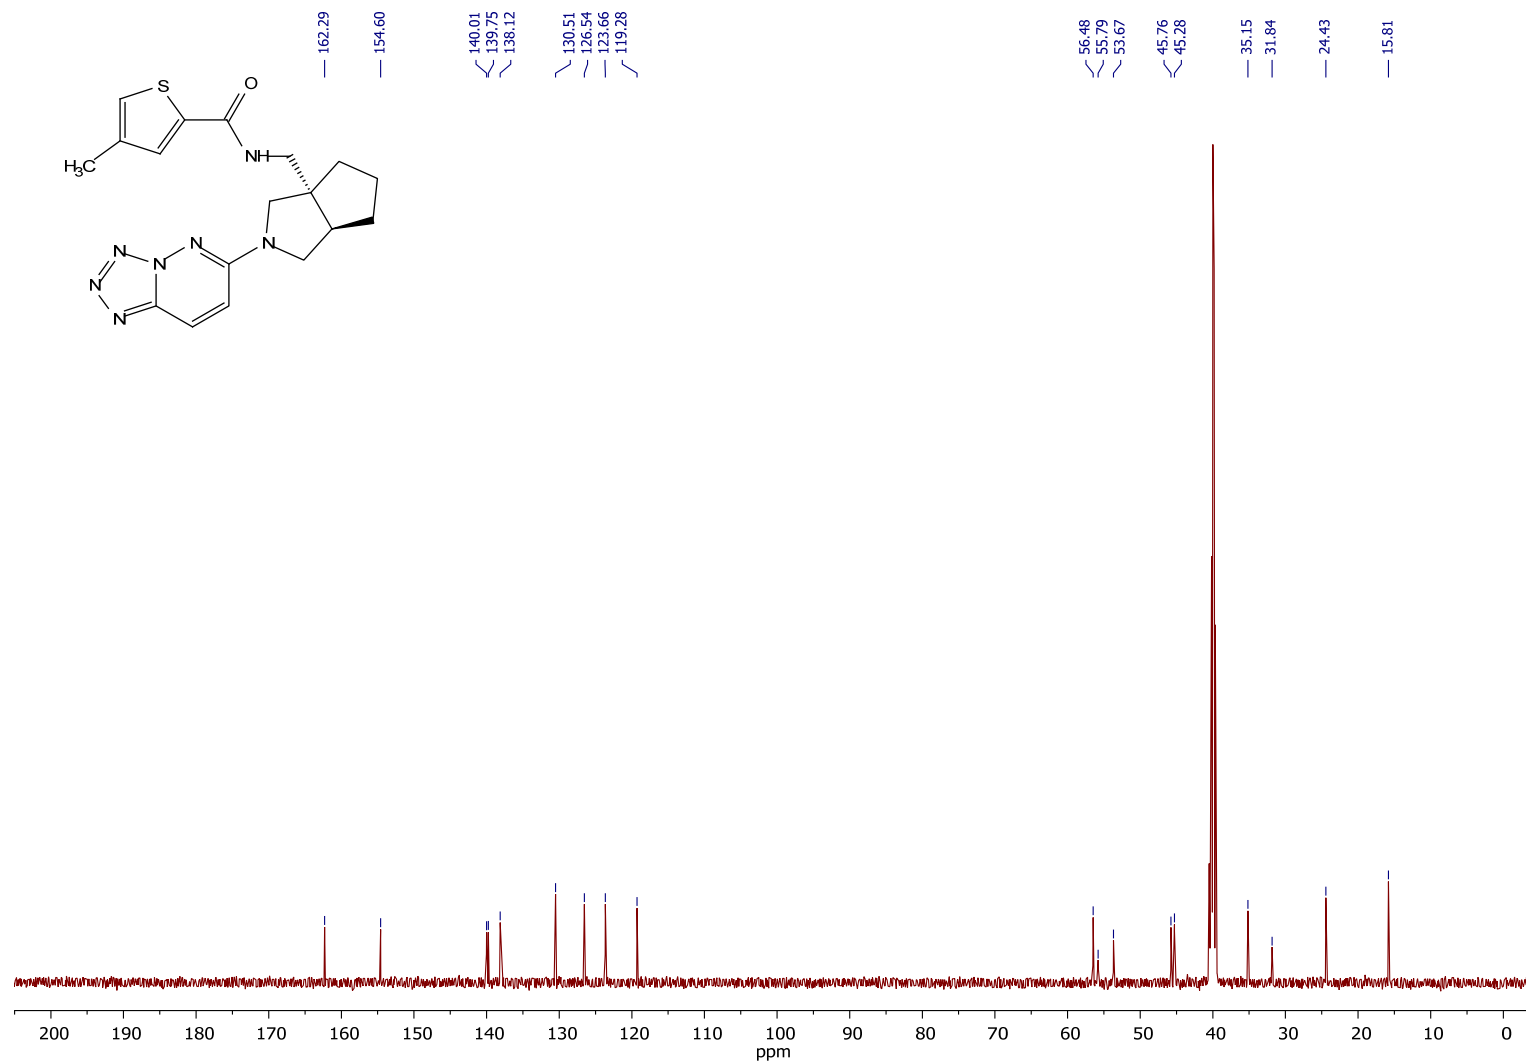

*rac*-4-Methyl-*N*-(((3*aR*,6*aS*)-2-(tetrazolo[1,5-*b*]pyridazin-6-yl)octahydrocyclopenta[*c*]pyrrol-3*a*-yl)methyl)thiophene-2-carboxamide (**14**{19,35,394}),  
<sup>13</sup>C NMR (126 MHz, DMSO-*d*<sub>6</sub>)

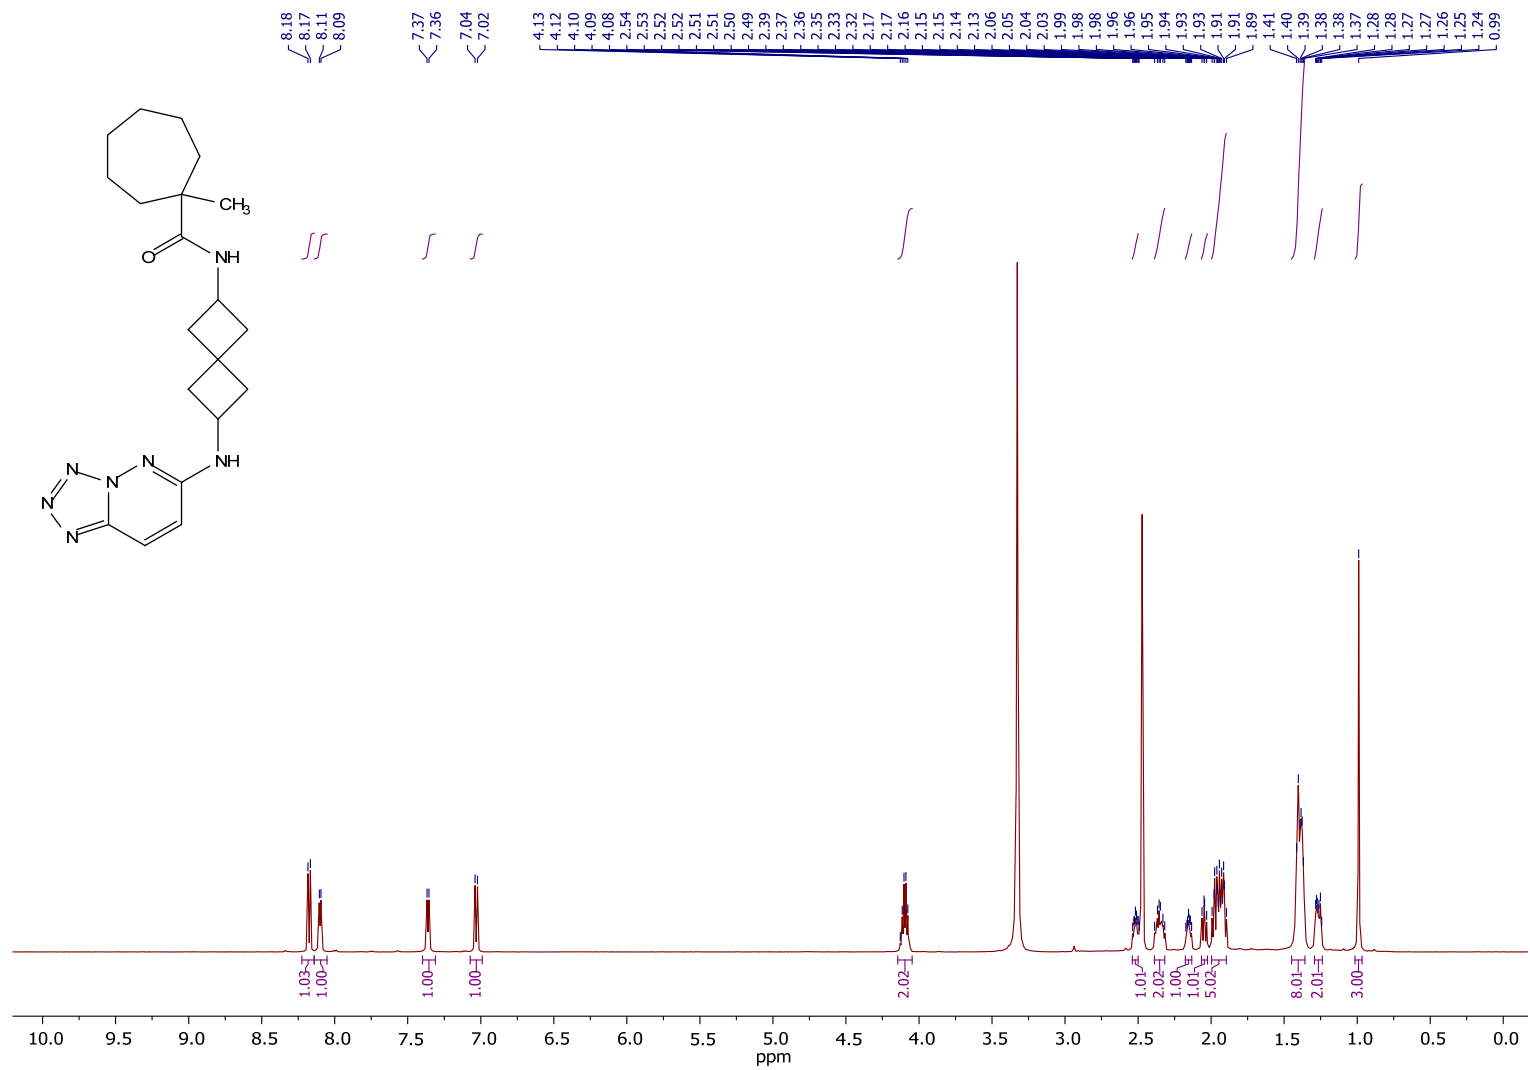

1-Methyl-*N*-(6-(tetrazolo[1,5-*b*]pyridazin-6-ylamino)spiro[3.3]heptan-2-yl)cycloheptanecarboxamide (**14** {114,35,399}),  
<sup>1</sup>H NMR (600 MHz, DMSO-*d*<sub>6</sub>)

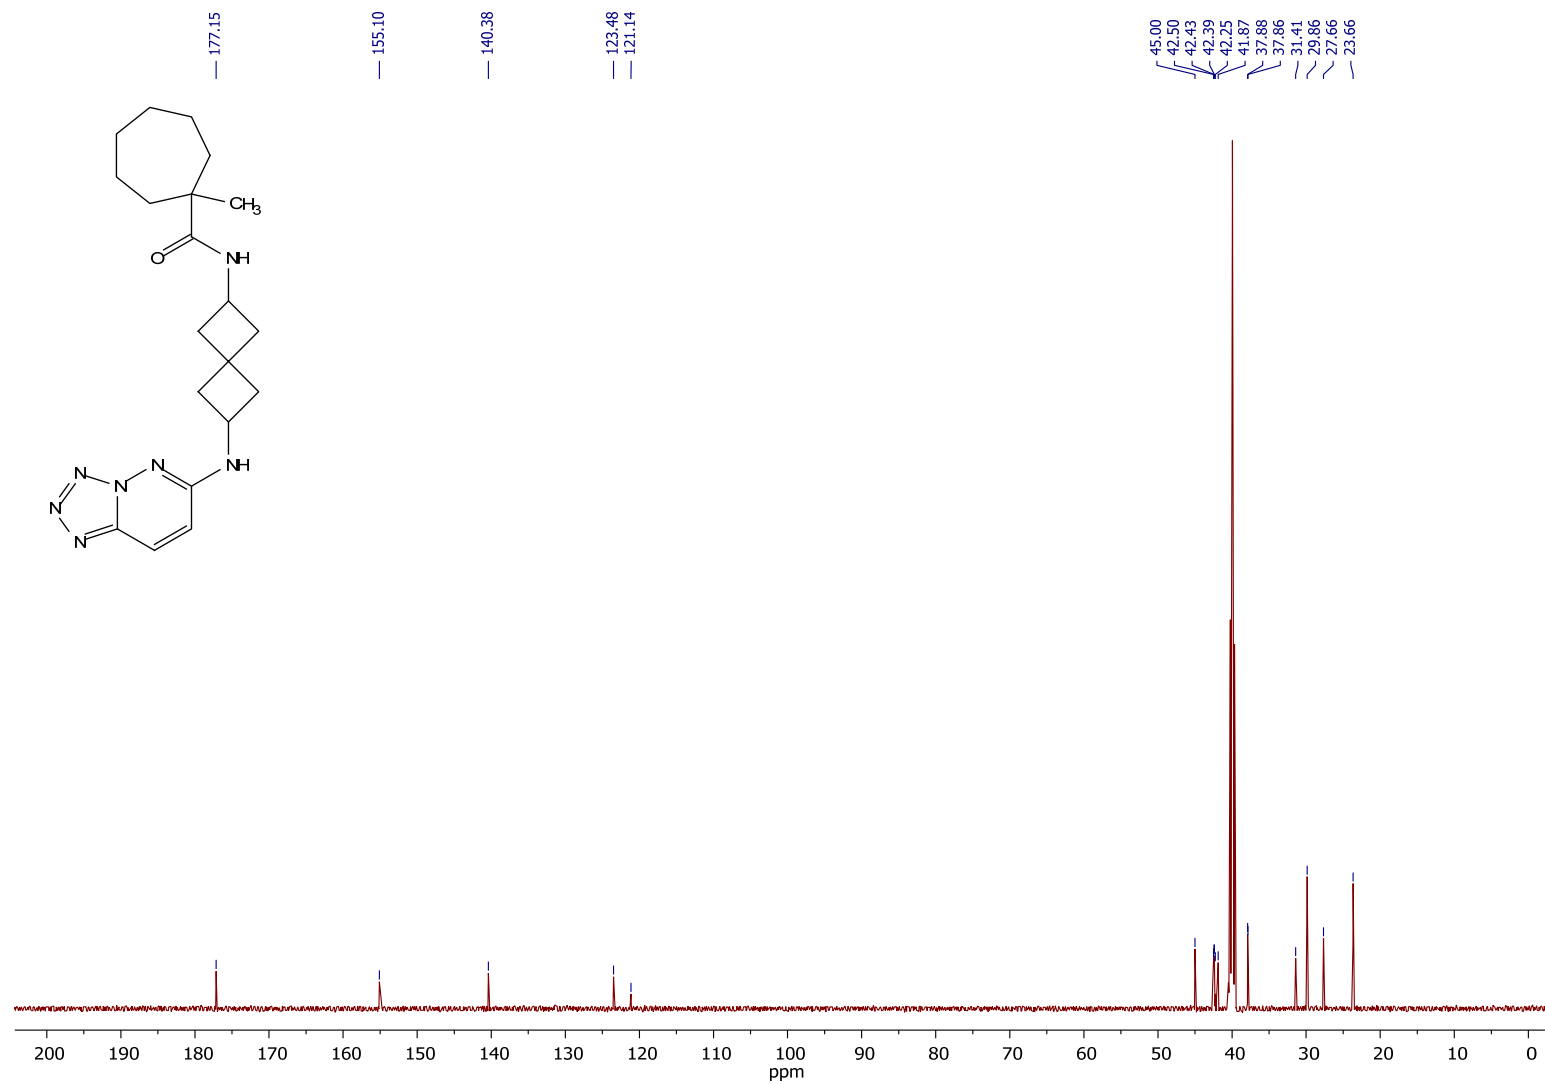

1-Methyl-N-(6-(tetrazolo[1,5-*b*]pyridazin-6-ylamino)spiro[3.3]heptan-2-yl)cycloheptanecarboxamide (**14** {114,35,399}),  
<sup>13</sup>C NMR (151 MHz, DMSO-*d*<sub>6</sub>)

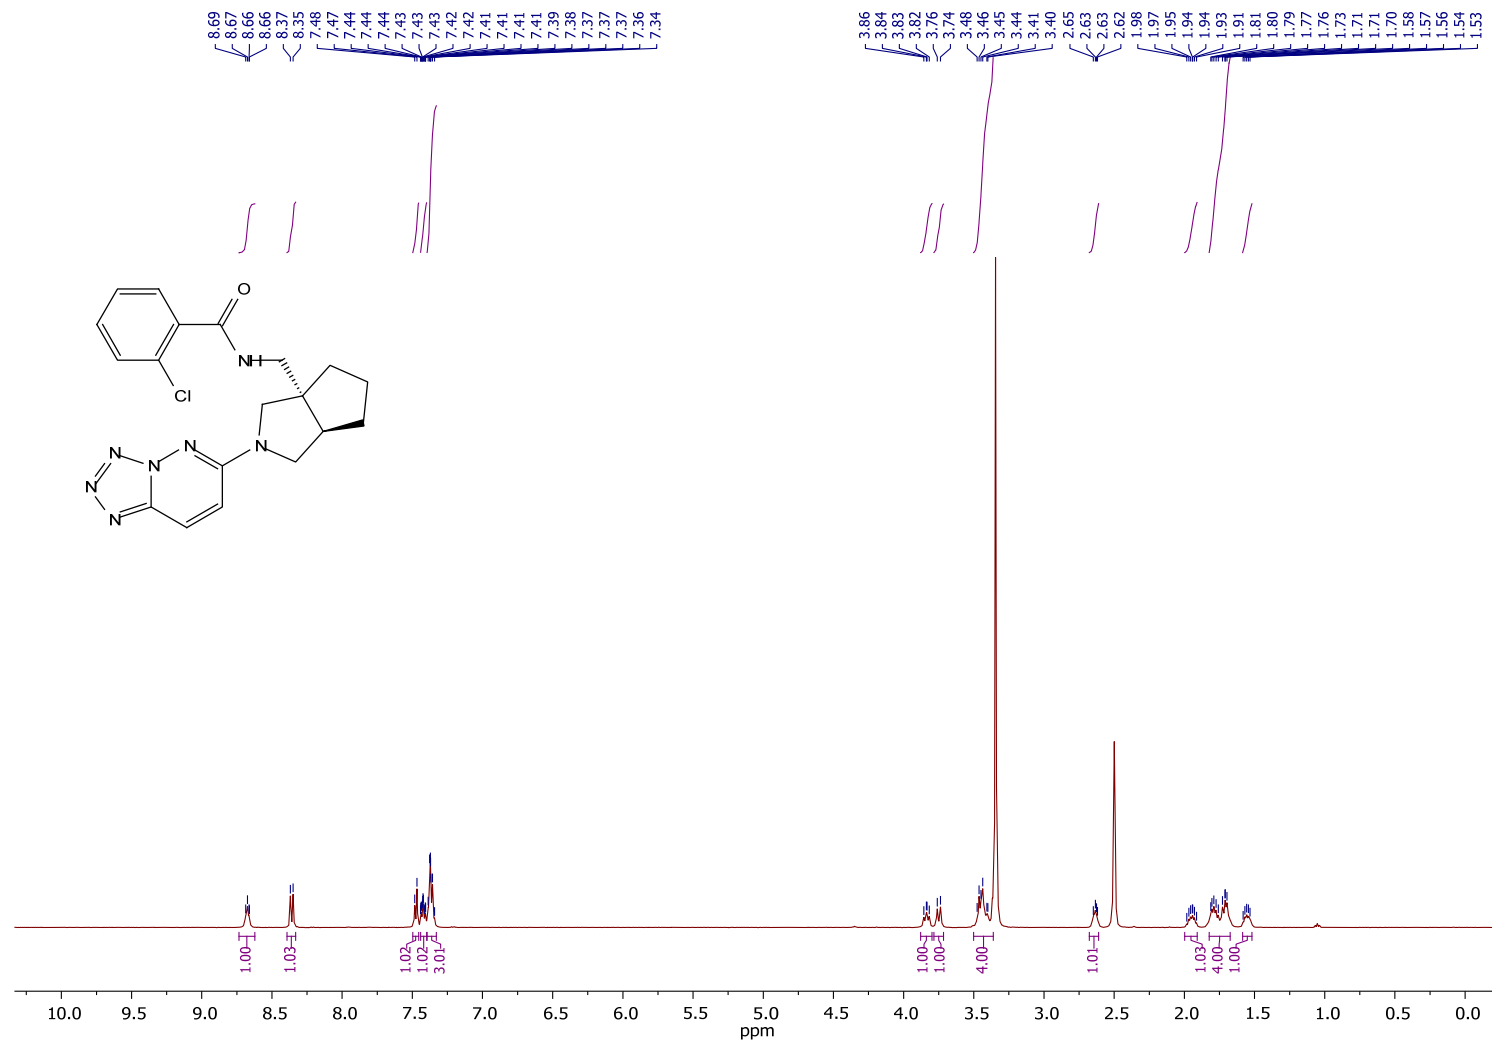

*rac*-2-Chloro-*N*-(((3*aR*,6*aS*)-2-(tetrazolo[1,5-*b*]pyridazin-6-yl)octahydrocyclopenta[*c*]pyrrol-3*a*-yl)methyl)benzamide (**14**{19,35,408}),  
<sup>1</sup>H NMR (500 MHz, DMSO-*d*<sub>6</sub>)

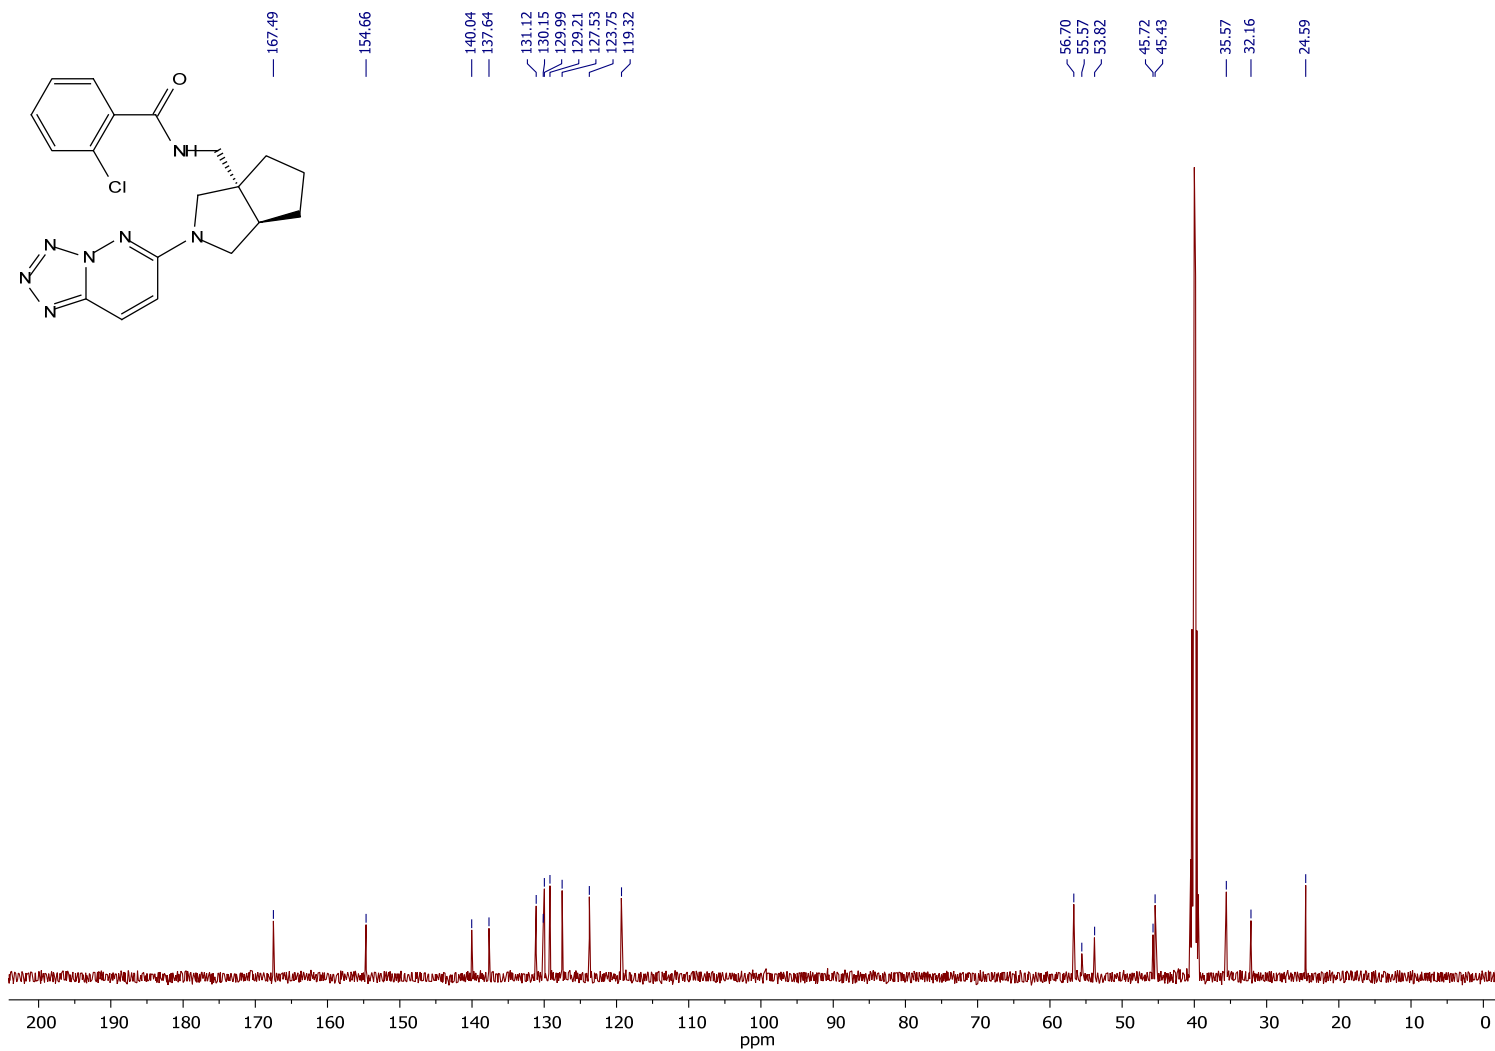

*rac*-2-Chloro-*N*-(((3*aR*,6*aS*)-2-(tetrazolo[1,5-*b*]pyridazin-6-yl)octahydrocyclopenta[*c*]pyrrol-3*a*-yl)methyl)benzamide (**14**{19,35,408}),  
<sup>13</sup>C NMR (126 MHz, DMSO-*d*<sub>6</sub>)

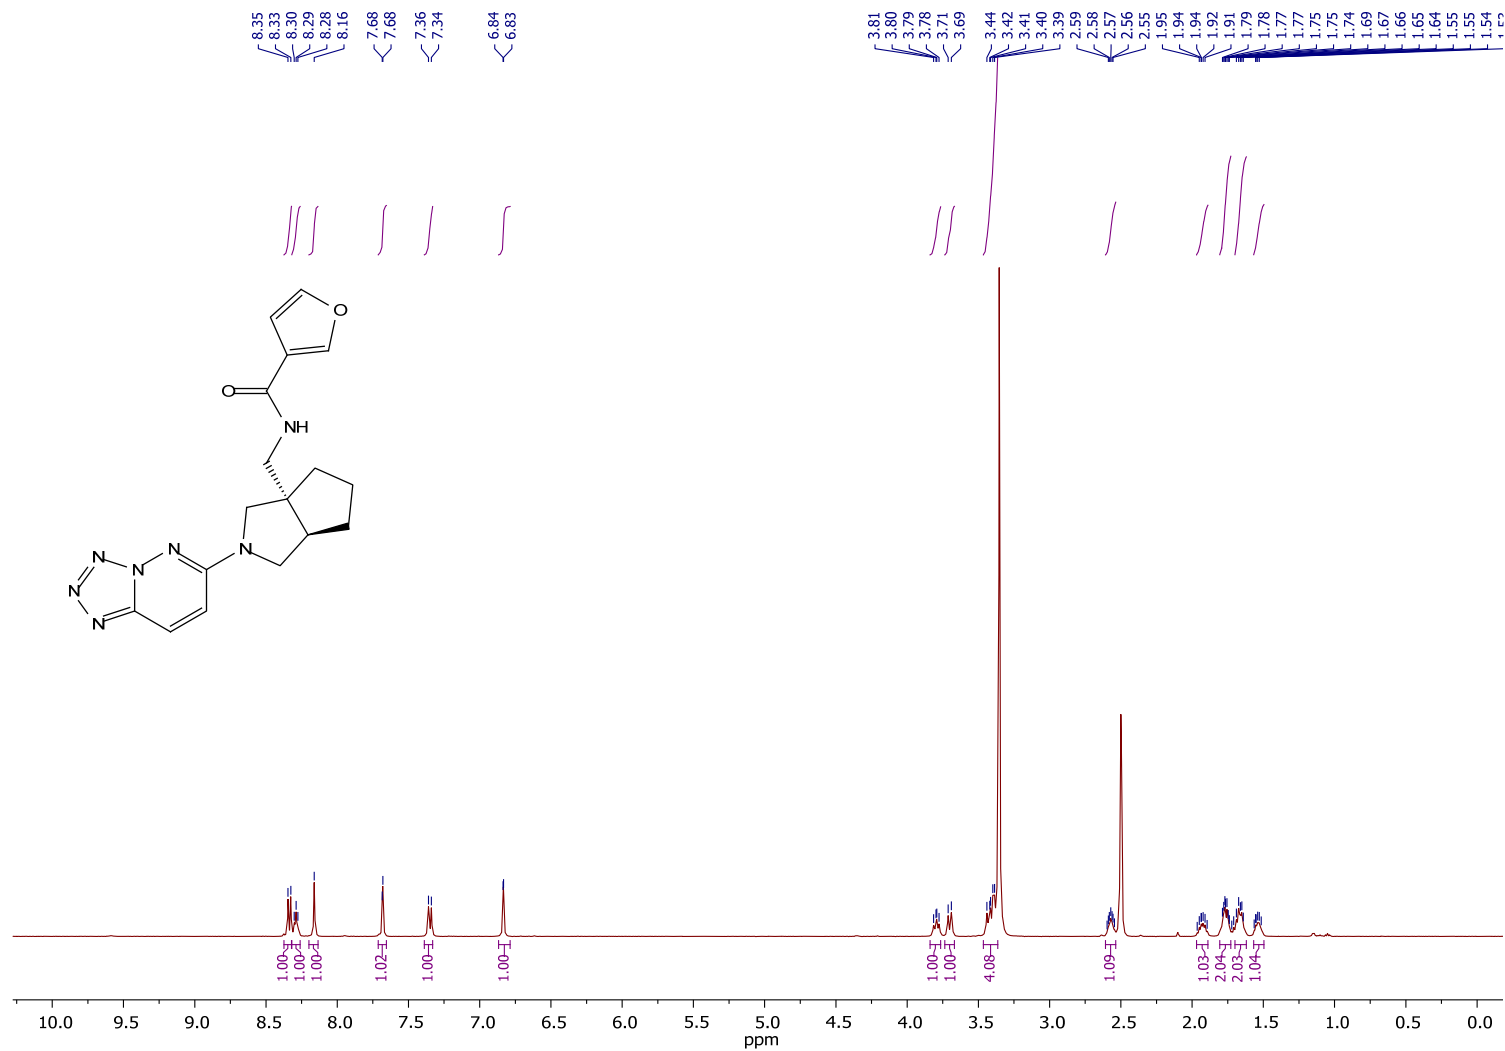

*rac*-*N*-(((3*aR*,6*aS*)-2-(tetrazolo[1,5-*b*]pyridazin-6-yl)octahydrocyclopenta[*c*]pyrrol-3*a*-yl)methyl)furan-3-carboxamide (**14**{19,35,32}),  
<sup>1</sup>H NMR (500 MHz, DMSO-*d*<sub>6</sub>)

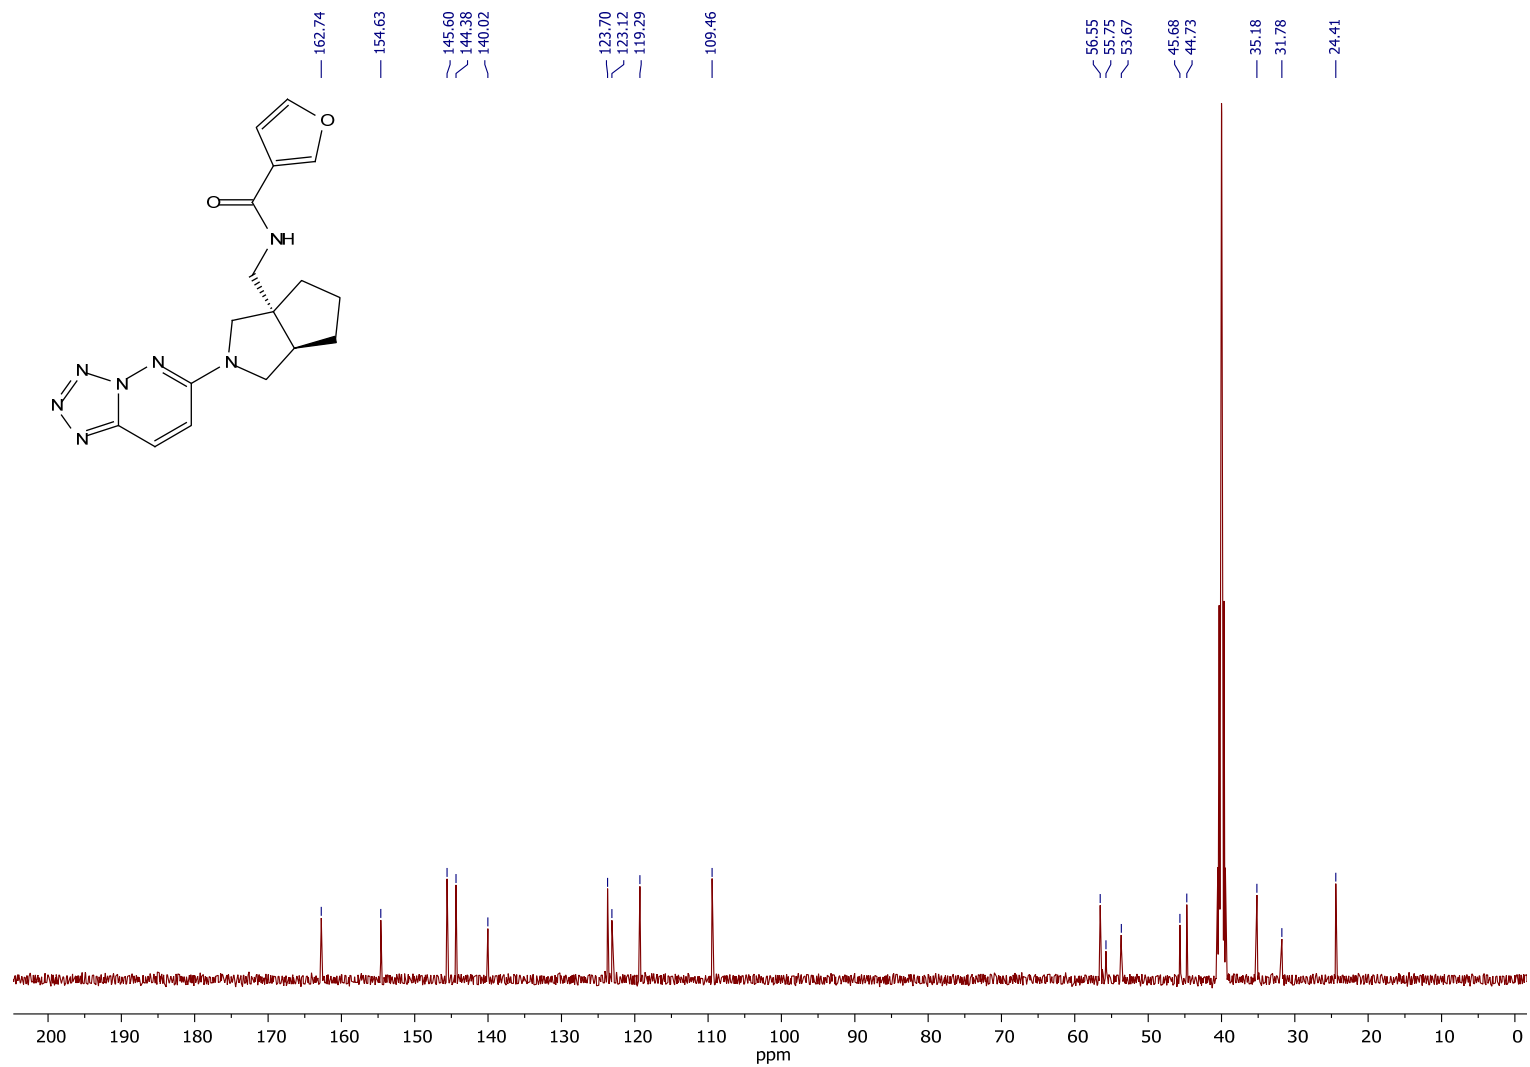

*rac*-*N*-(((3*aR*,6*aS*)-2-(tetrazolo[1,5-*b*]pyridazin-6-yl)octahydrocyclopenta[*c*]pyrrol-3*a*-yl)methyl)furan-3-carboxamide (**14**{19,35,32}),  
 $^{13}\text{C}$  NMR (126 MHz, DMSO- $d_6$ )



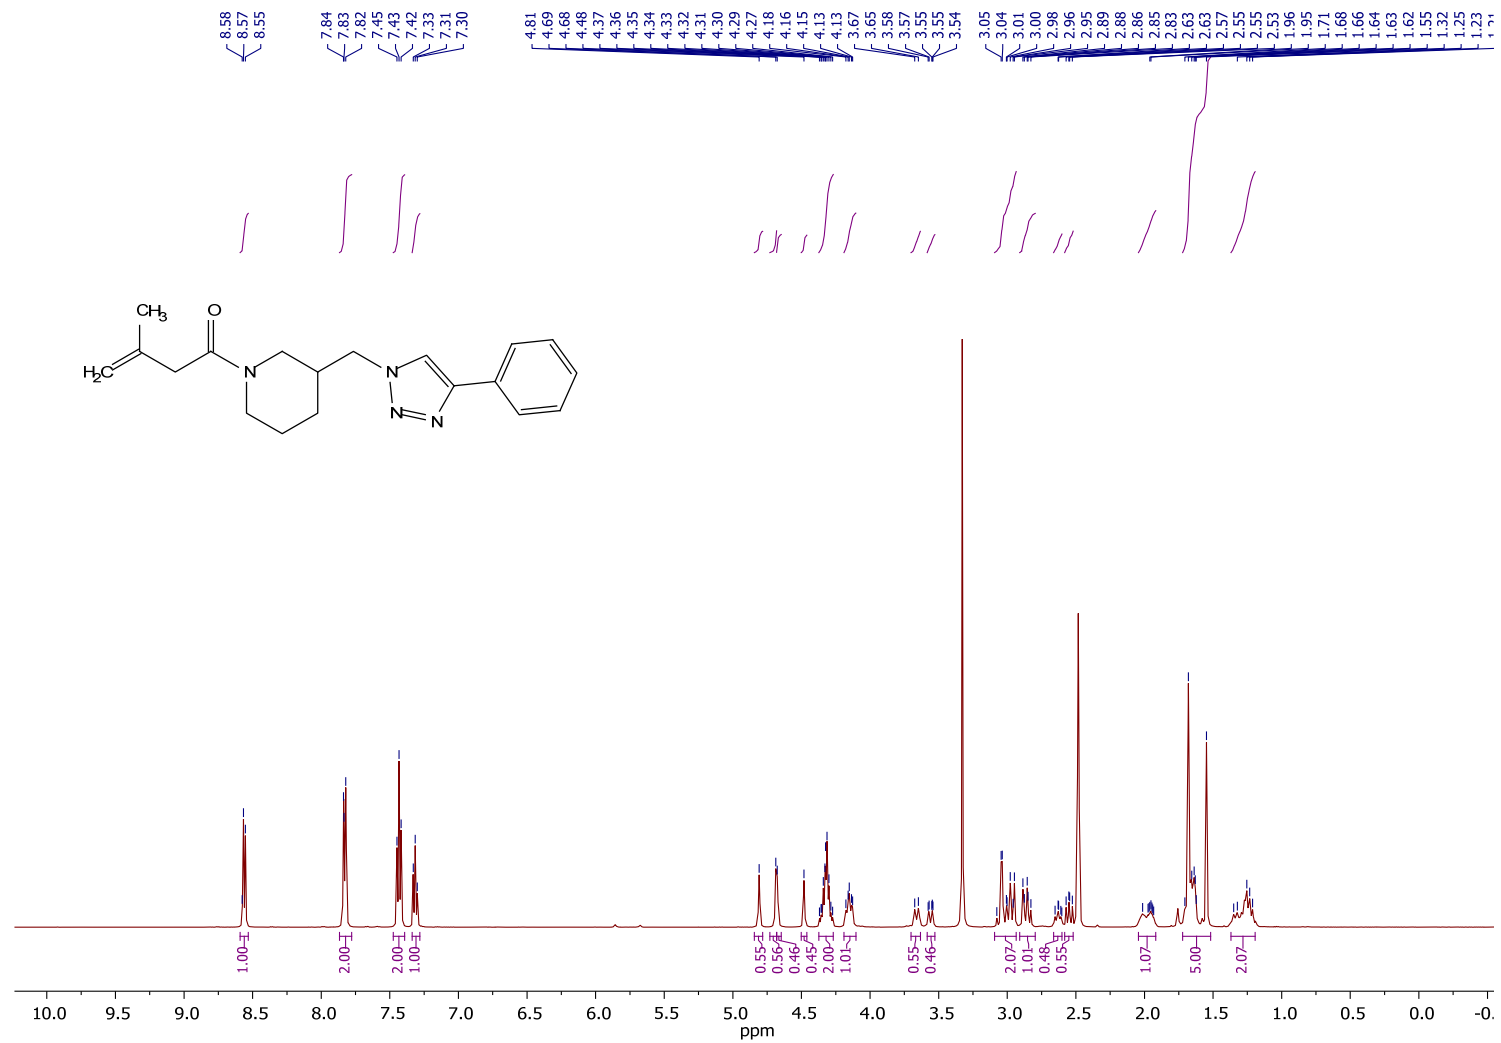

3-Methyl-1-(3-((4-phenyl-1H-1,2,3-triazol-1-yl)methyl)piperidin-1-yl)but-3-en-1-one (**15**{5,7,7}), <sup>1</sup>H NMR (500 MHz, DMSO-d<sub>6</sub>)

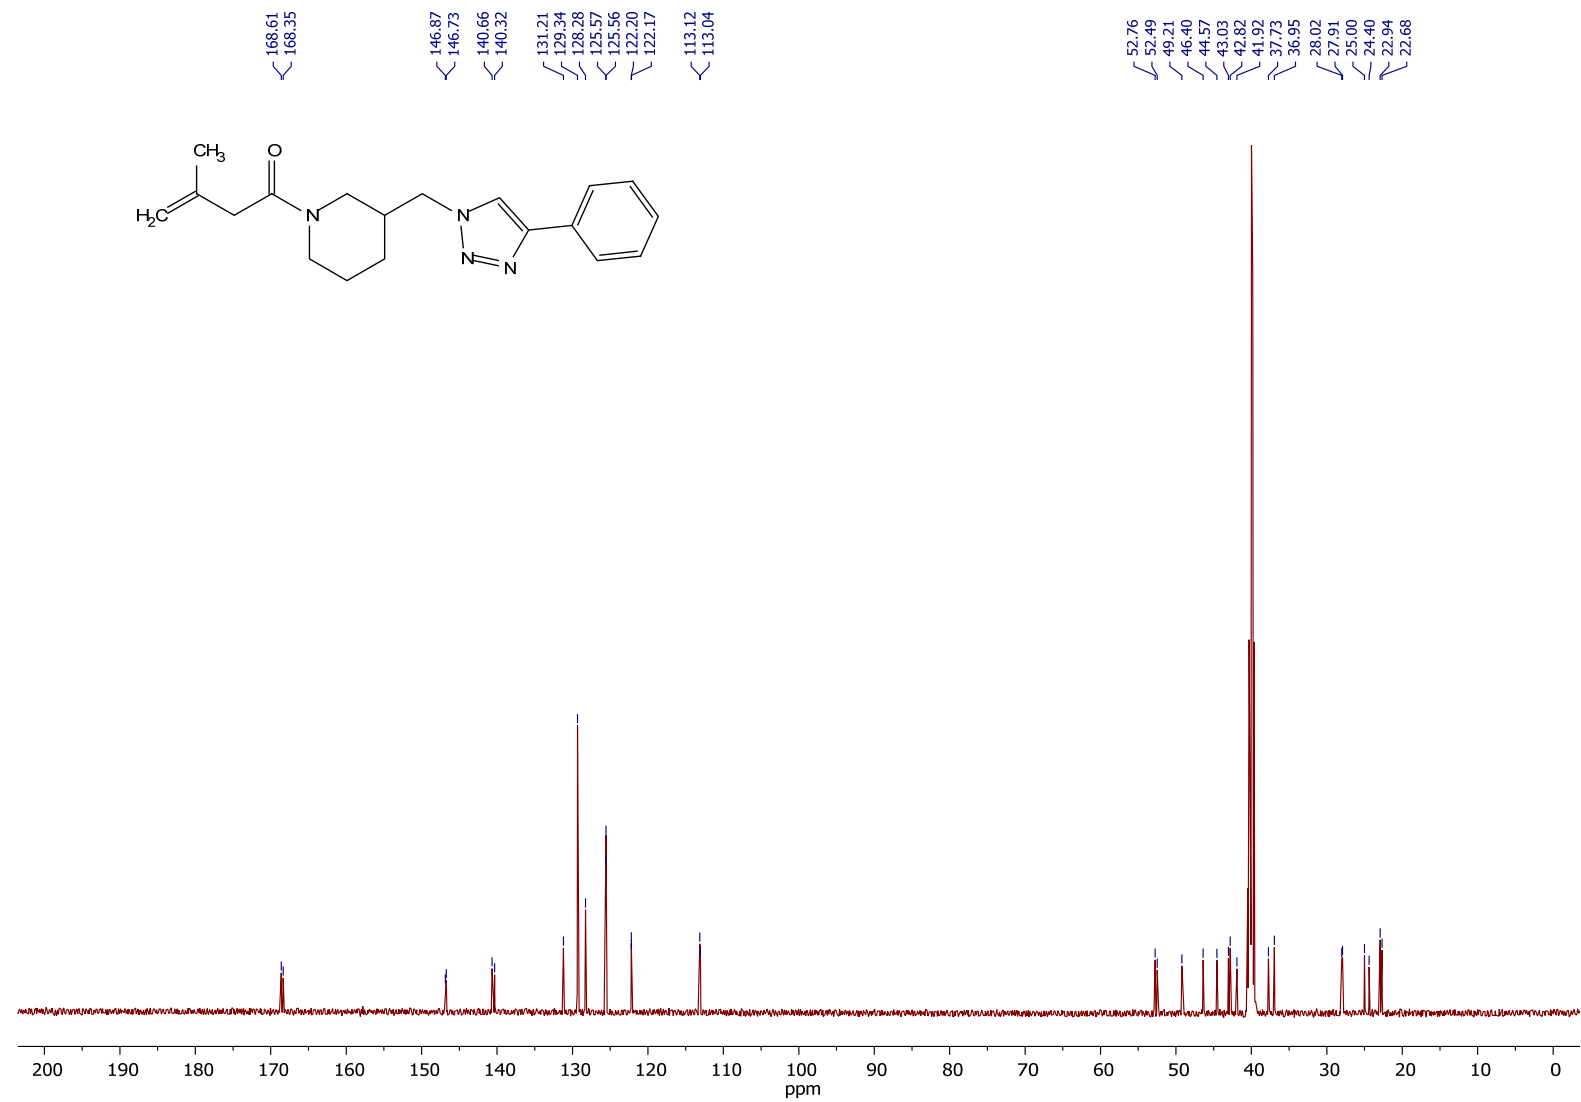

3-Methyl-1-(3-((4-phenyl-1H-1,2,3-triazol-1-yl)methyl)piperidin-1-yl)but-3-en-1-one (**15**{5,7,7}), <sup>13</sup>C NMR (126 MHz, DMSO-*d*<sub>6</sub>)

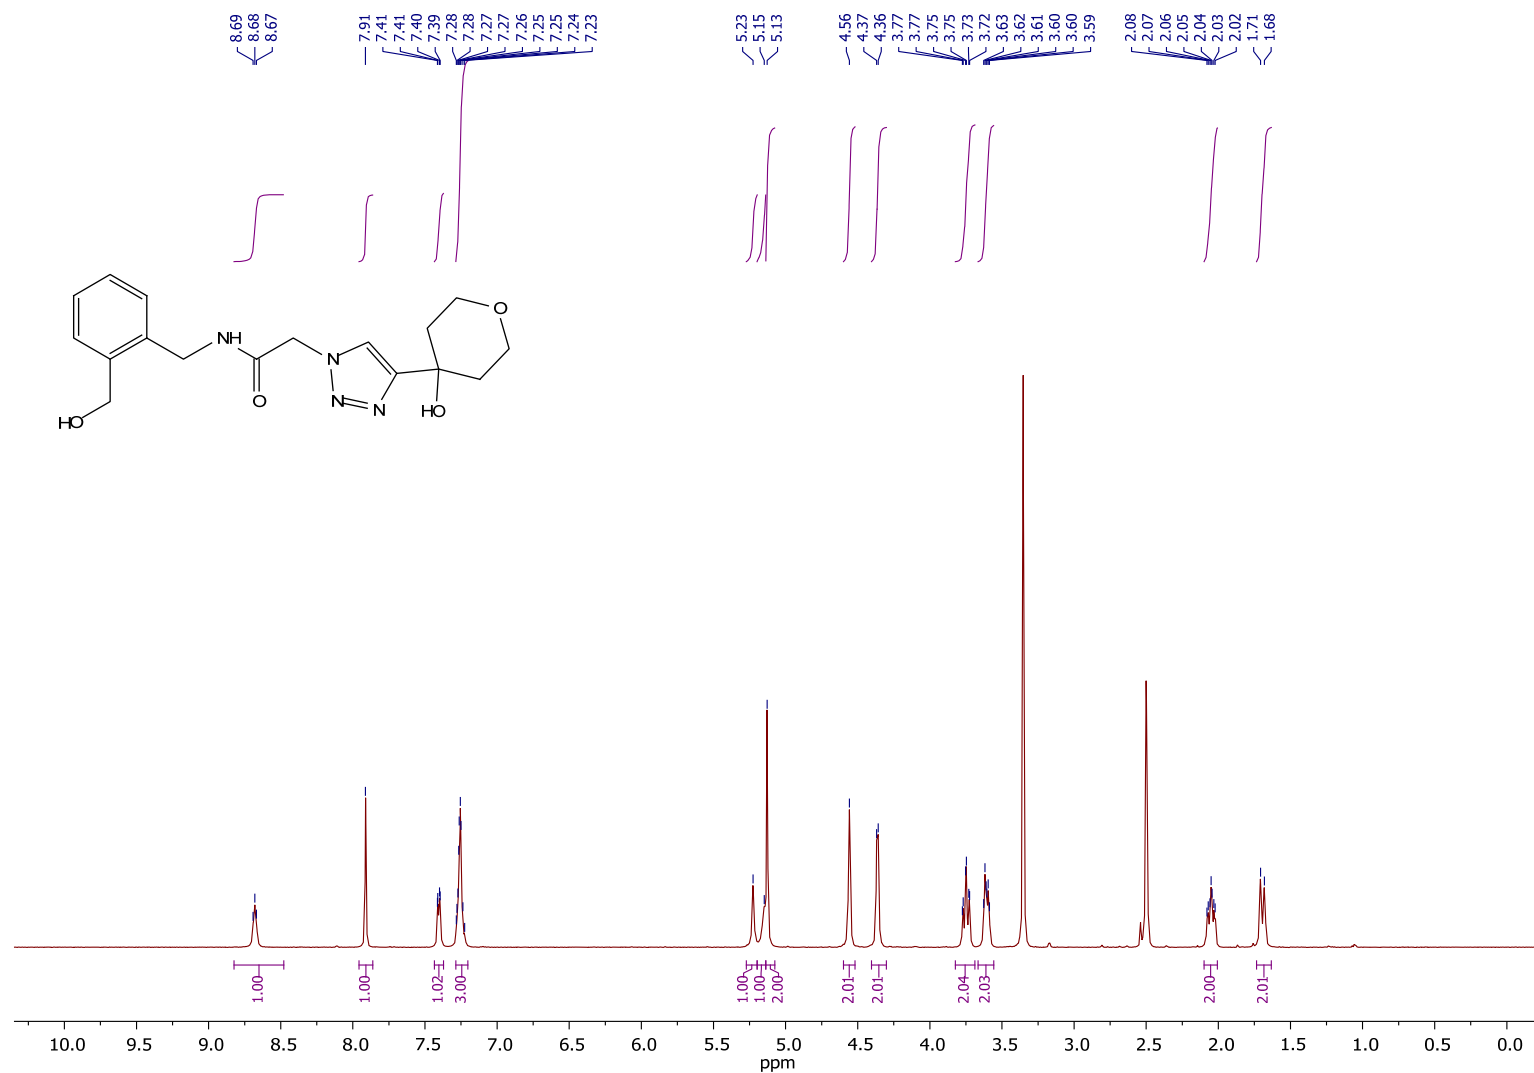

*N*-(3-Hydroxybutyl)-2-(4-(4-hydroxytetrahydro-2*H*-pyran-4-yl)-1*H*-1,2,3-triazol-1-yl)-*N*-methylacetamide (**15**{3,20,38}),  
<sup>1</sup>H NMR (500 MHz, DMSO-*d*<sub>6</sub>)

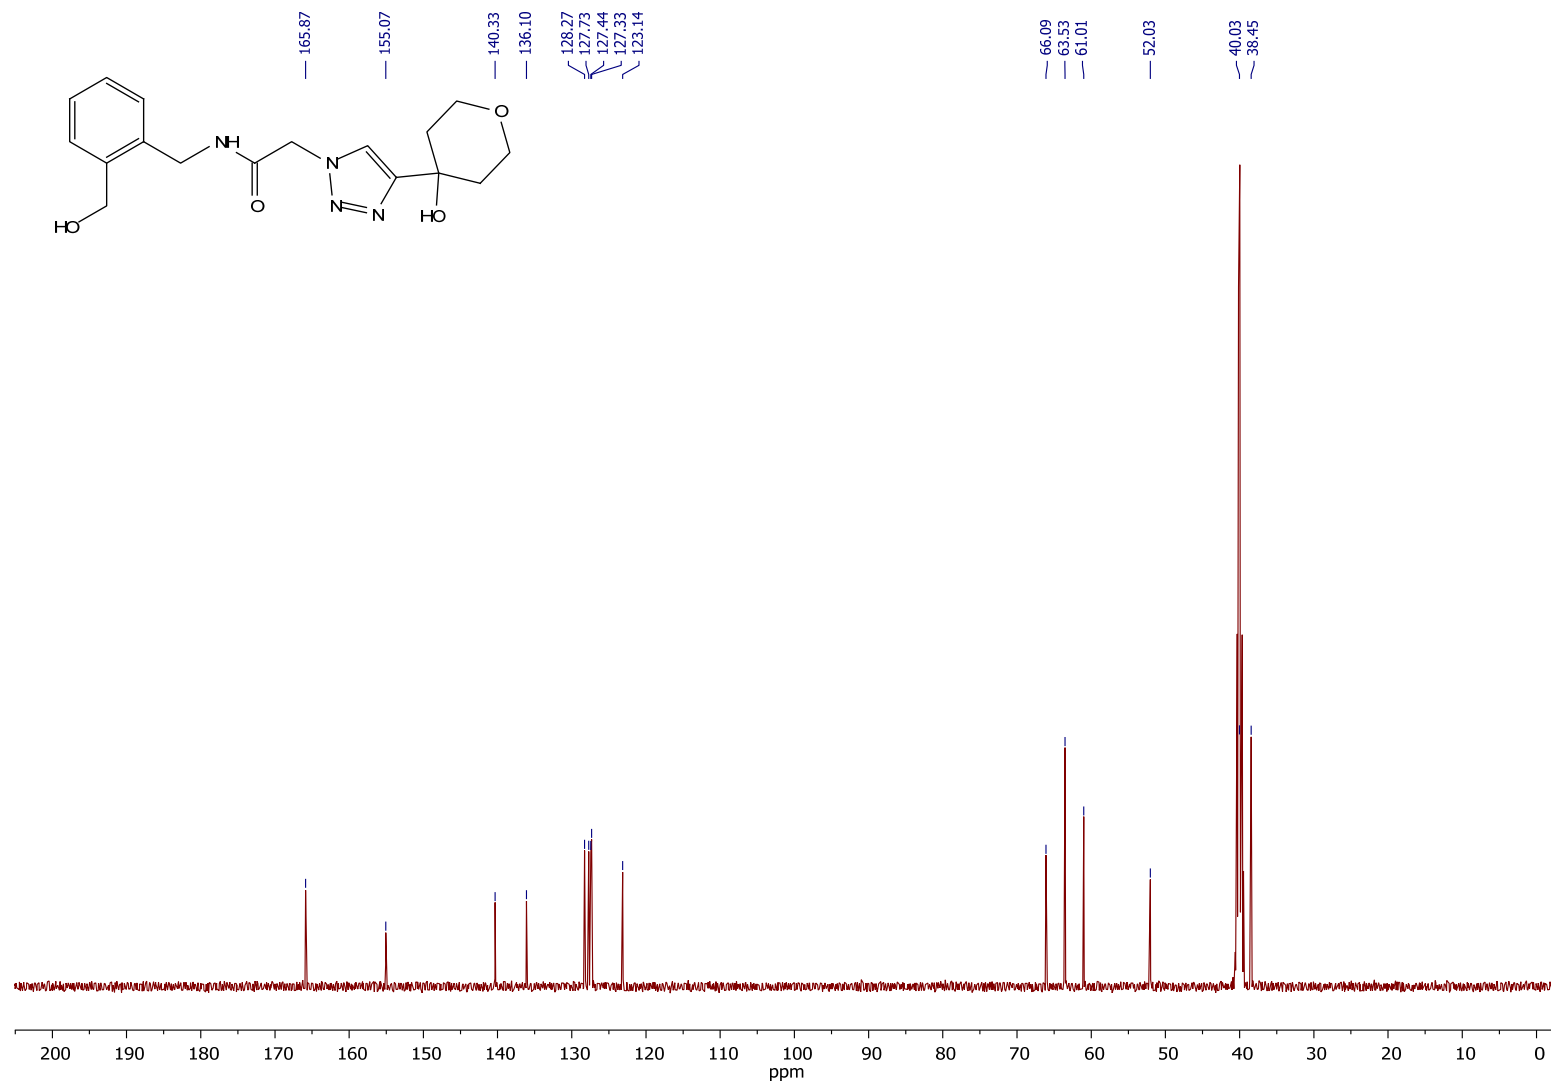

*N*-(3-Hydroxybutyl)-2-(4-(4-hydroxytetrahydro-2H-pyran-4-yl)-1H-1,2,3-triazol-1-yl)-*N*-methylacetamide (**15**{3,20,38}),  
<sup>13</sup>C NMR (126 MHz, DMSO-*d*<sub>6</sub>)

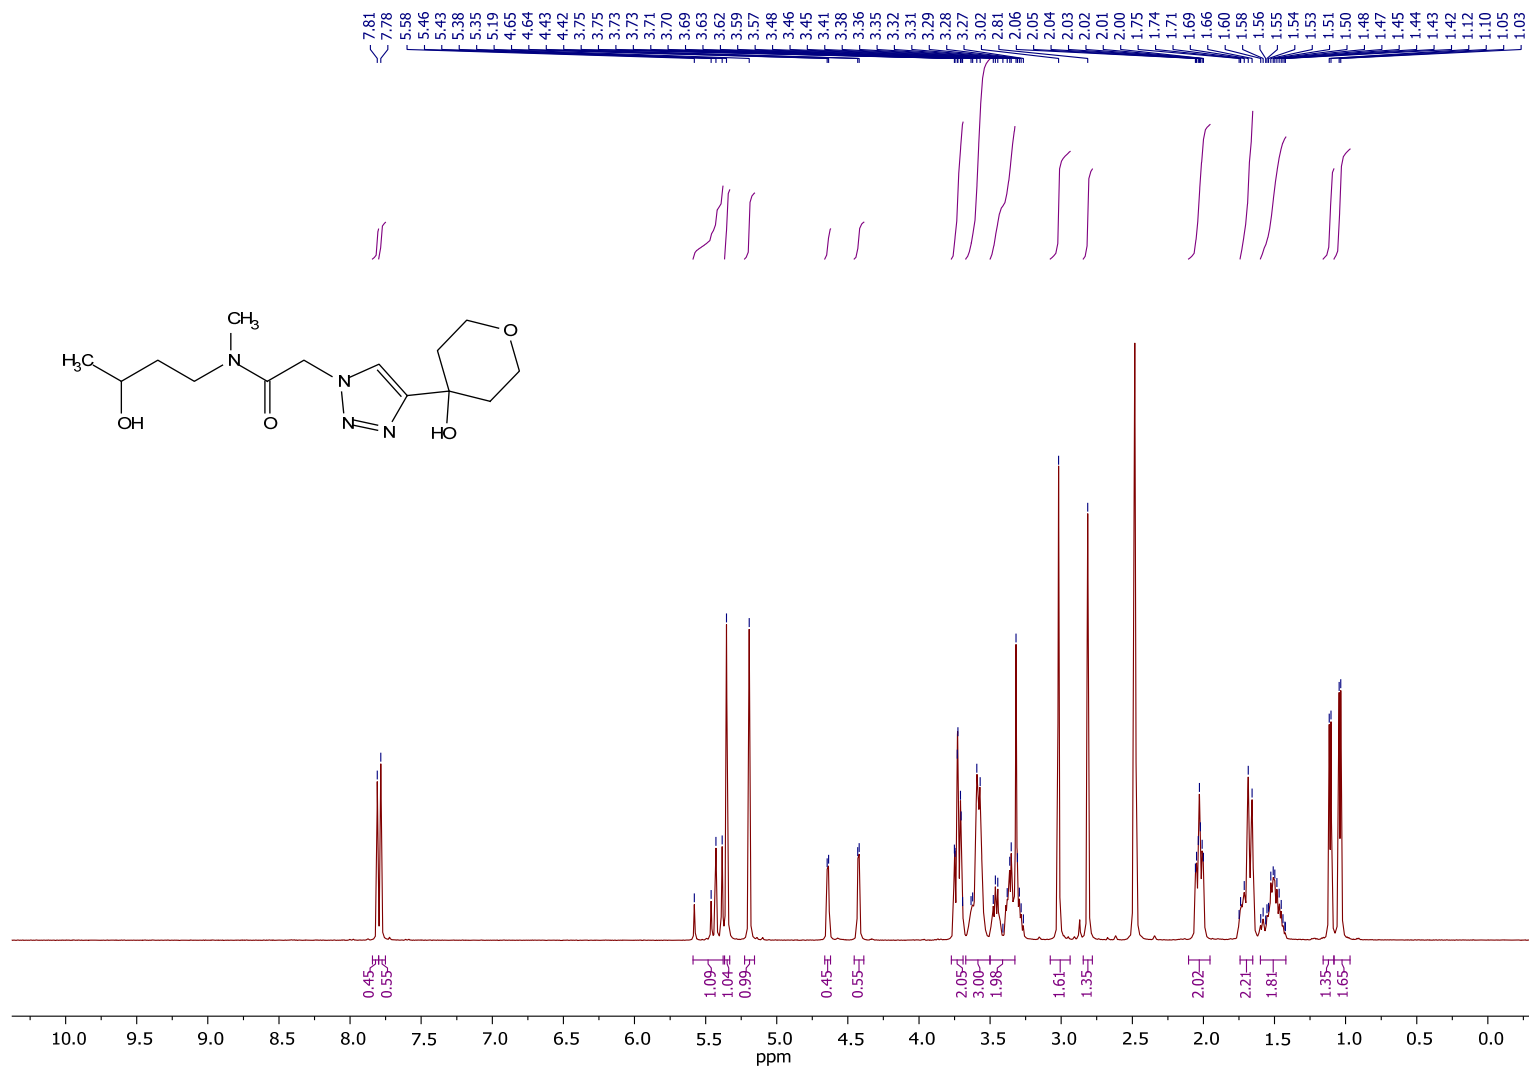

*N*-(3-Hydroxybutyl)-2-(4-(4-hydroxytetrahydro-2H-pyran-4-yl)-1H-1,2,3-triazol-1-yl)-*N*-methylacetamide (**15**{3,20,38}),  
<sup>1</sup>H NMR (500 MHz, DMSO-*d*<sub>6</sub>)

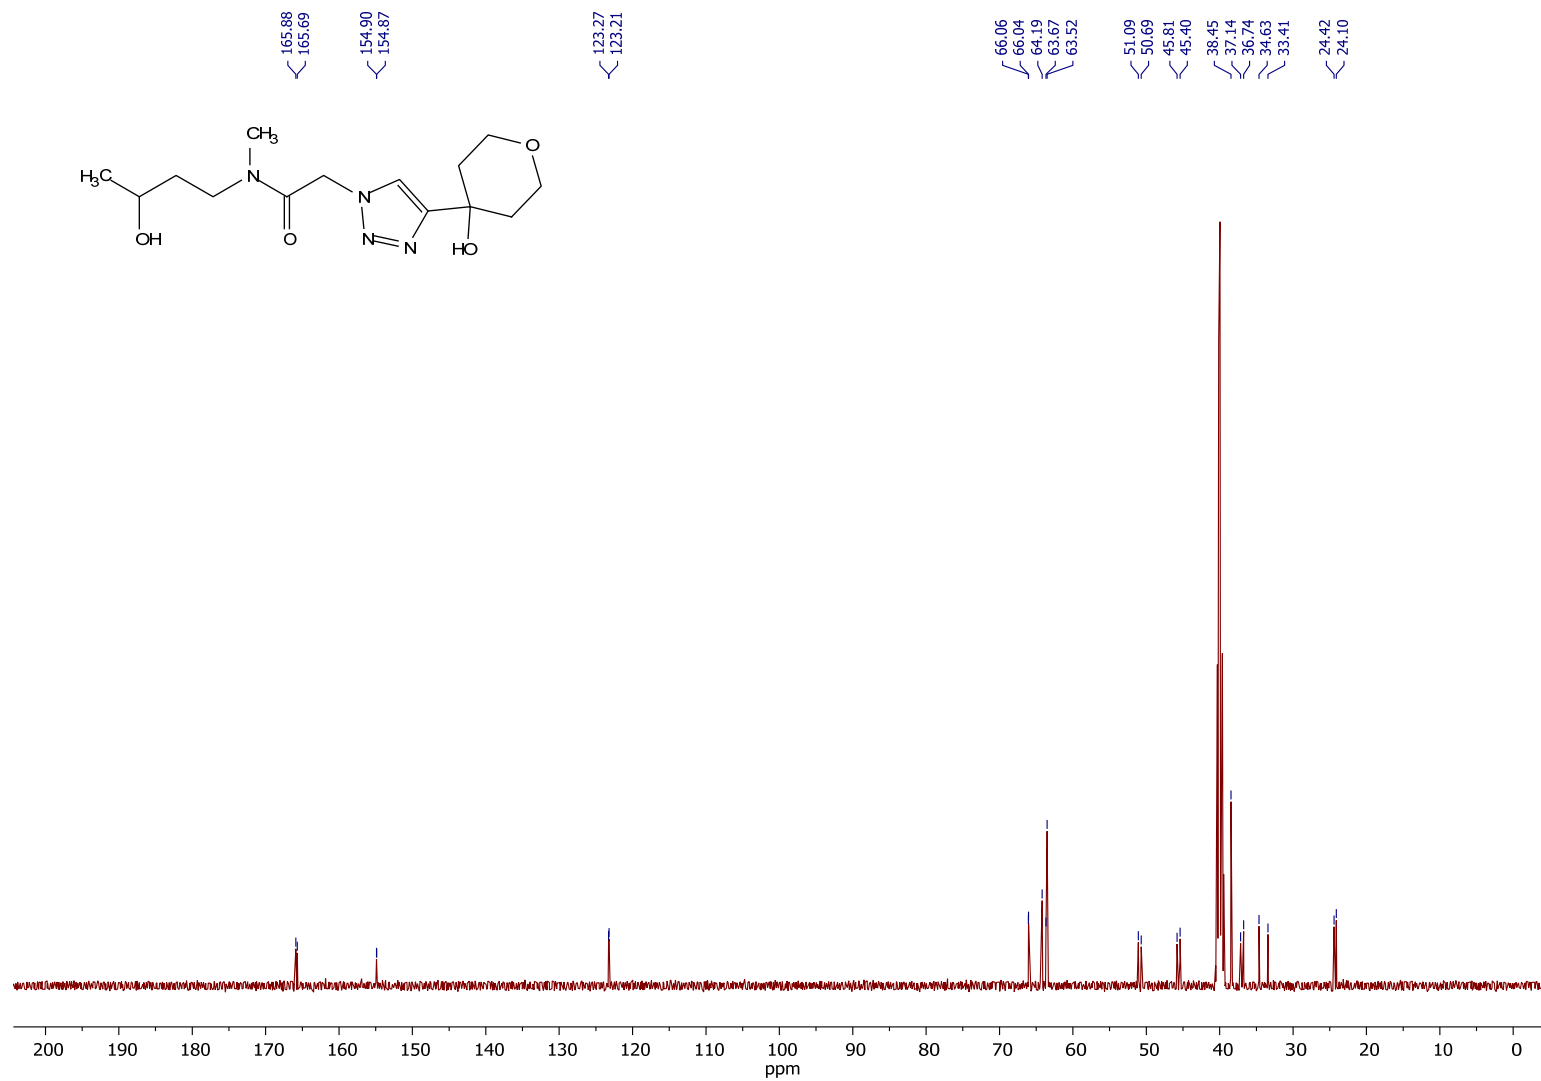

*N*-(3-Hydroxybutyl)-2-(4-(4-hydroxytetrahydro-2H-pyran-4-yl)-1H-1,2,3-triazol-1-yl)-*N*-methylacetamide (**15**{3,20,38}),  
<sup>13</sup>C NMR (126 MHz, DMSO-*d*<sub>6</sub>)

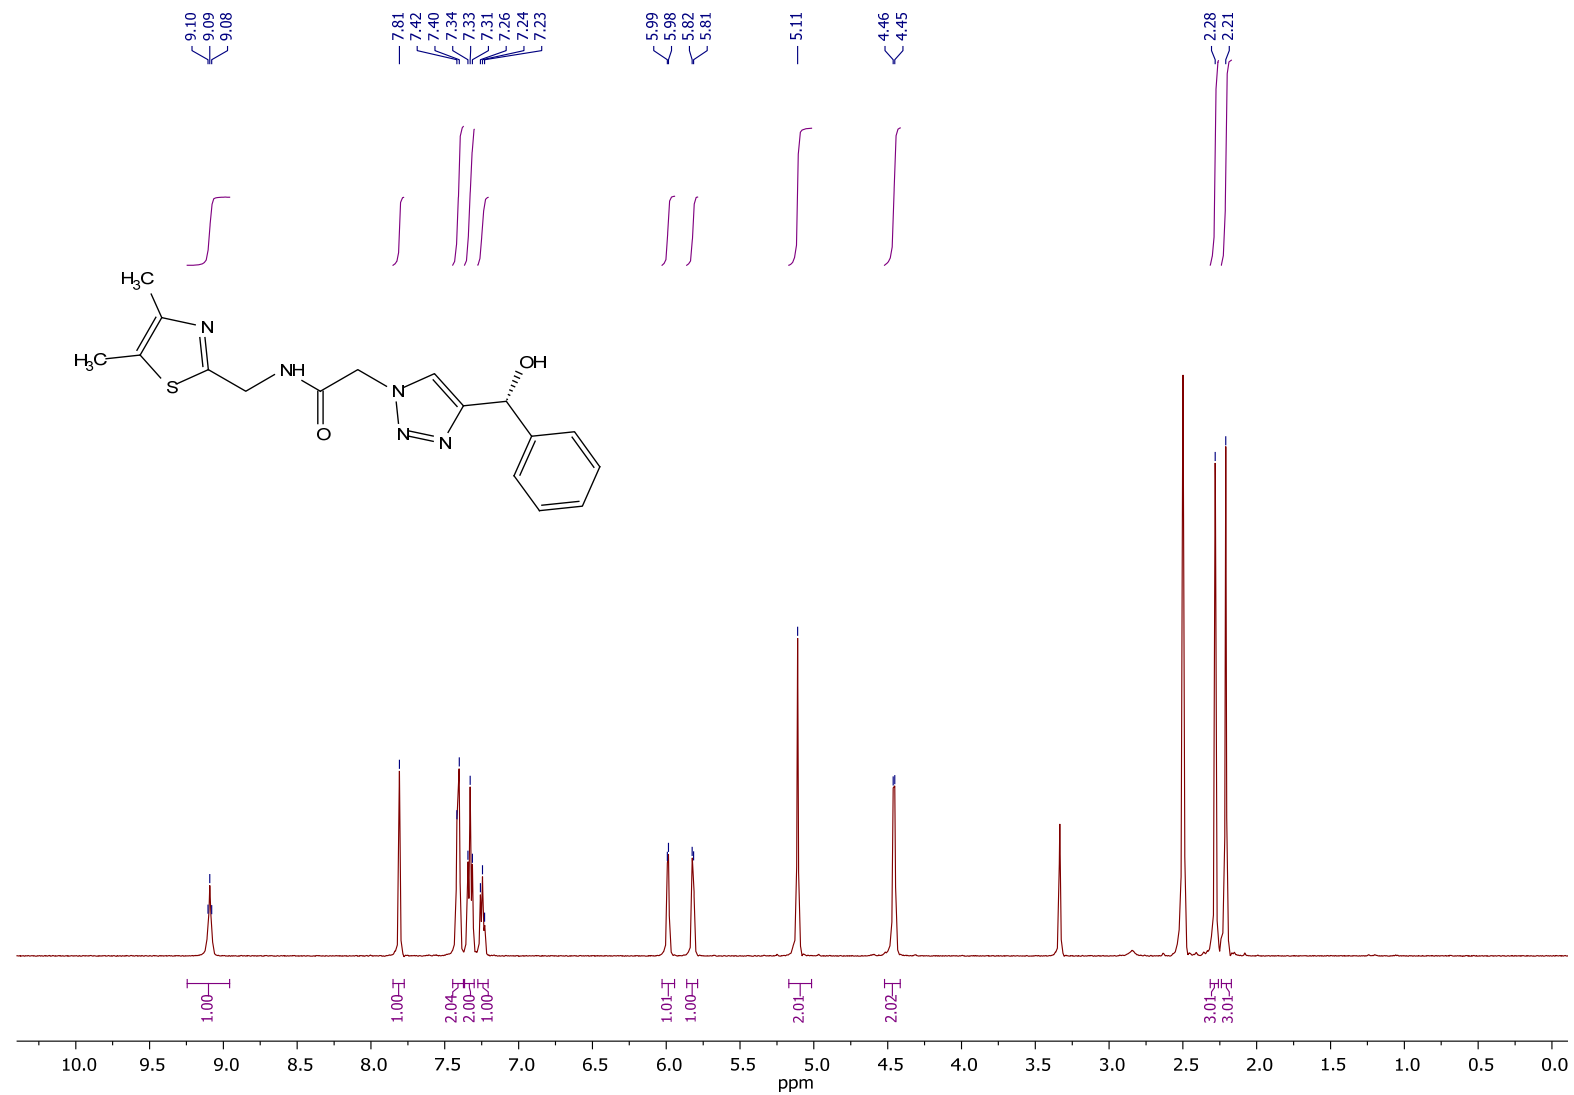

*N*-((4,5-Dimethylthiazol-2-yl)methyl)-2-(4-(hydroxy(phenyl)methyl)-1*H*-1,2,3-triazol-1-yl)acetamide (**15**{3,21,37}), <sup>1</sup>H NMR (500 MHz, DMSO-*d*<sub>6</sub>)

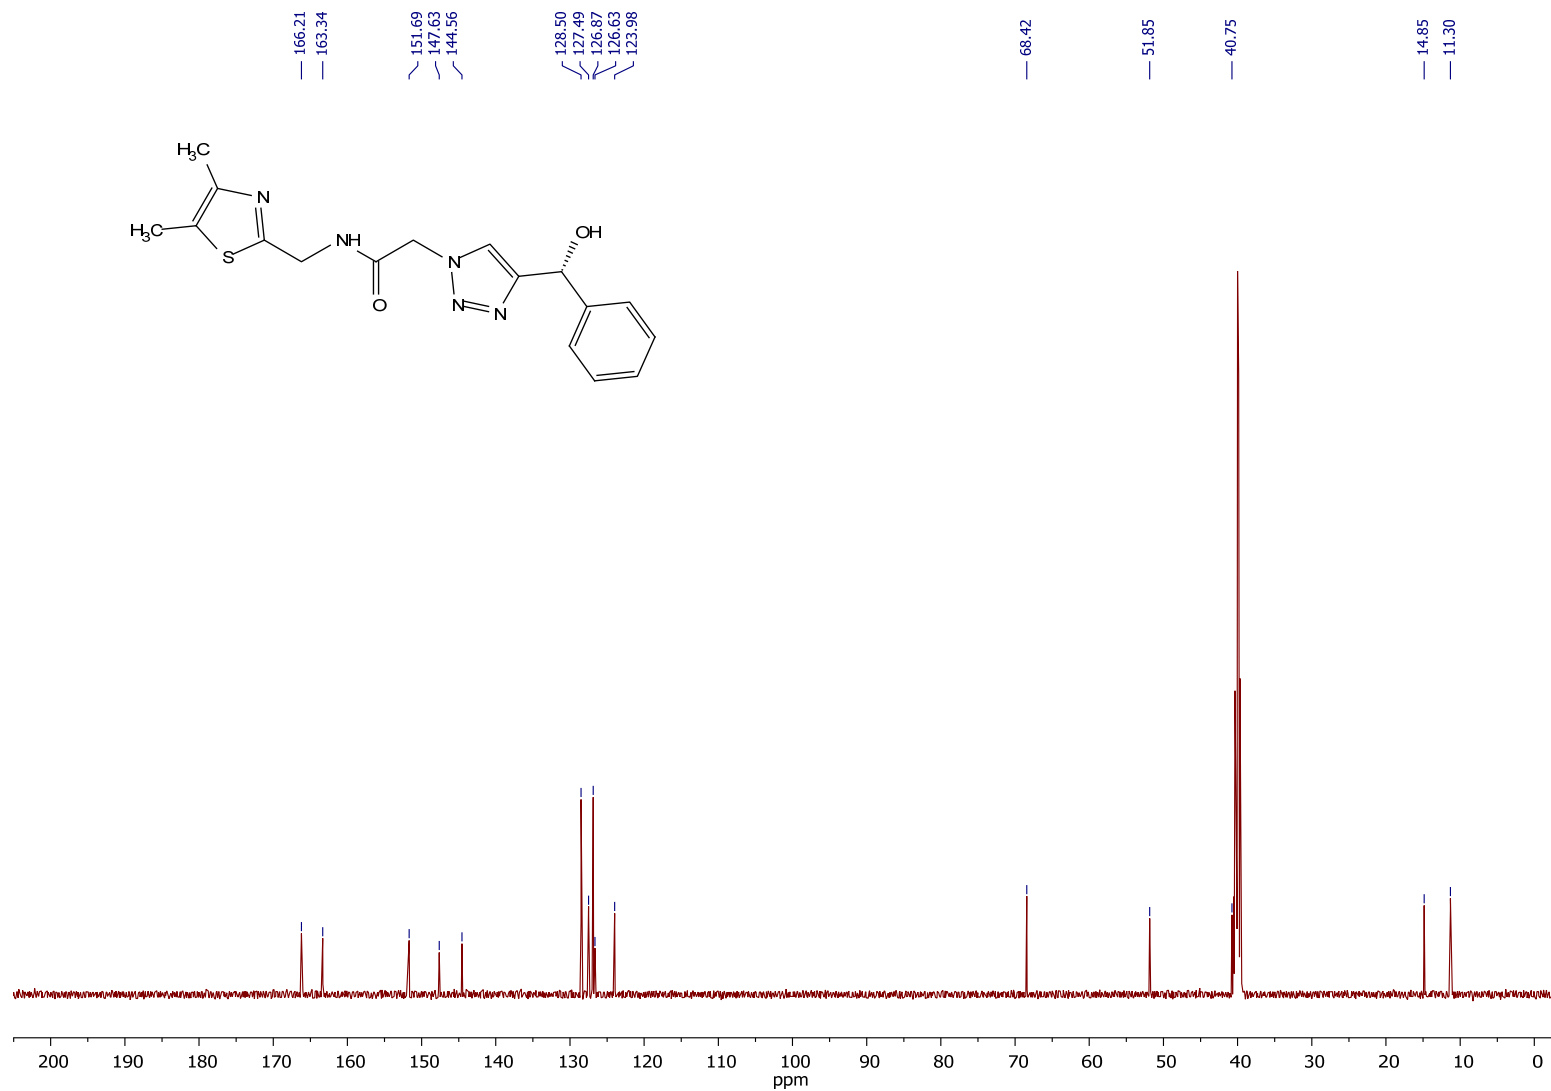

(*N*-((4,5-Dimethylthiazol-2-yl)methyl)-2-(4-(hydroxy(phenyl)methyl)-1*H*-1,2,3-triazol-1-yl)acetamide (**15** {3,21,37}),  
<sup>13</sup>C NMR (126 MHz, DMSO-*d*<sub>6</sub>)



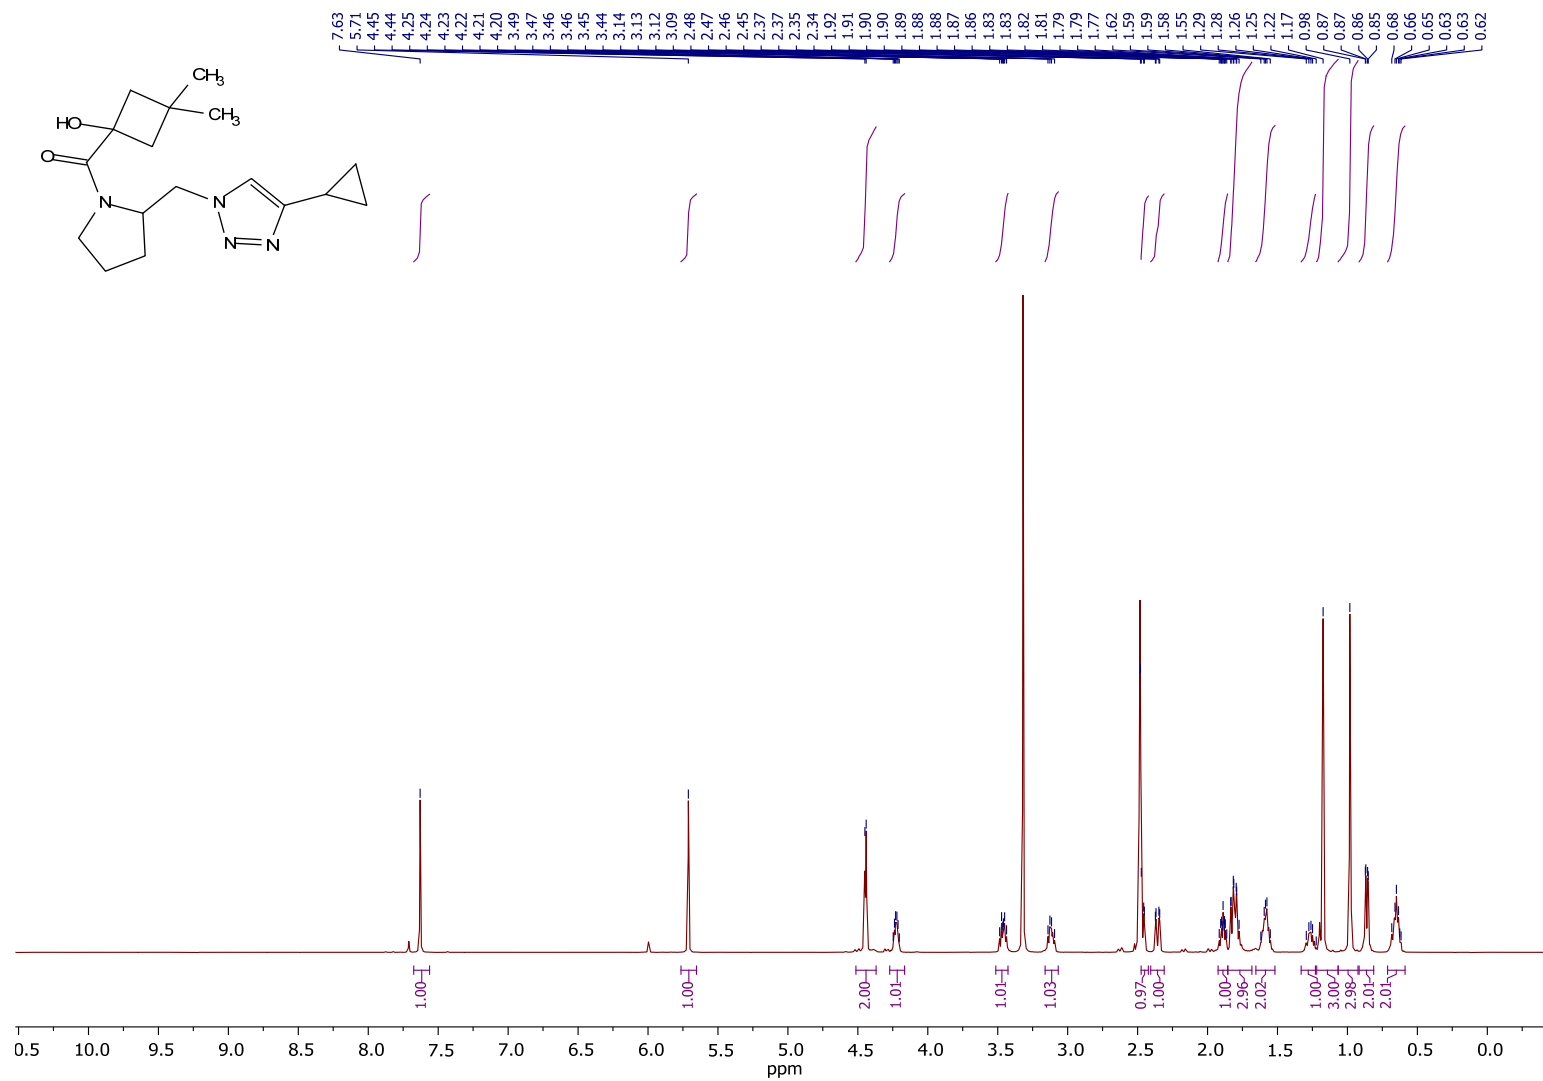

(2-((4-Cyclopropyl-1*H*-1,2,3-triazol-1-yl)methyl)pyrrolidin-1-yl)(1-hydroxy-3,3-dimethylcyclobutyl)methanone (**15**{1,6,6}),  
<sup>1</sup>H NMR (500 MHz, DMSO-*d*<sub>6</sub>)

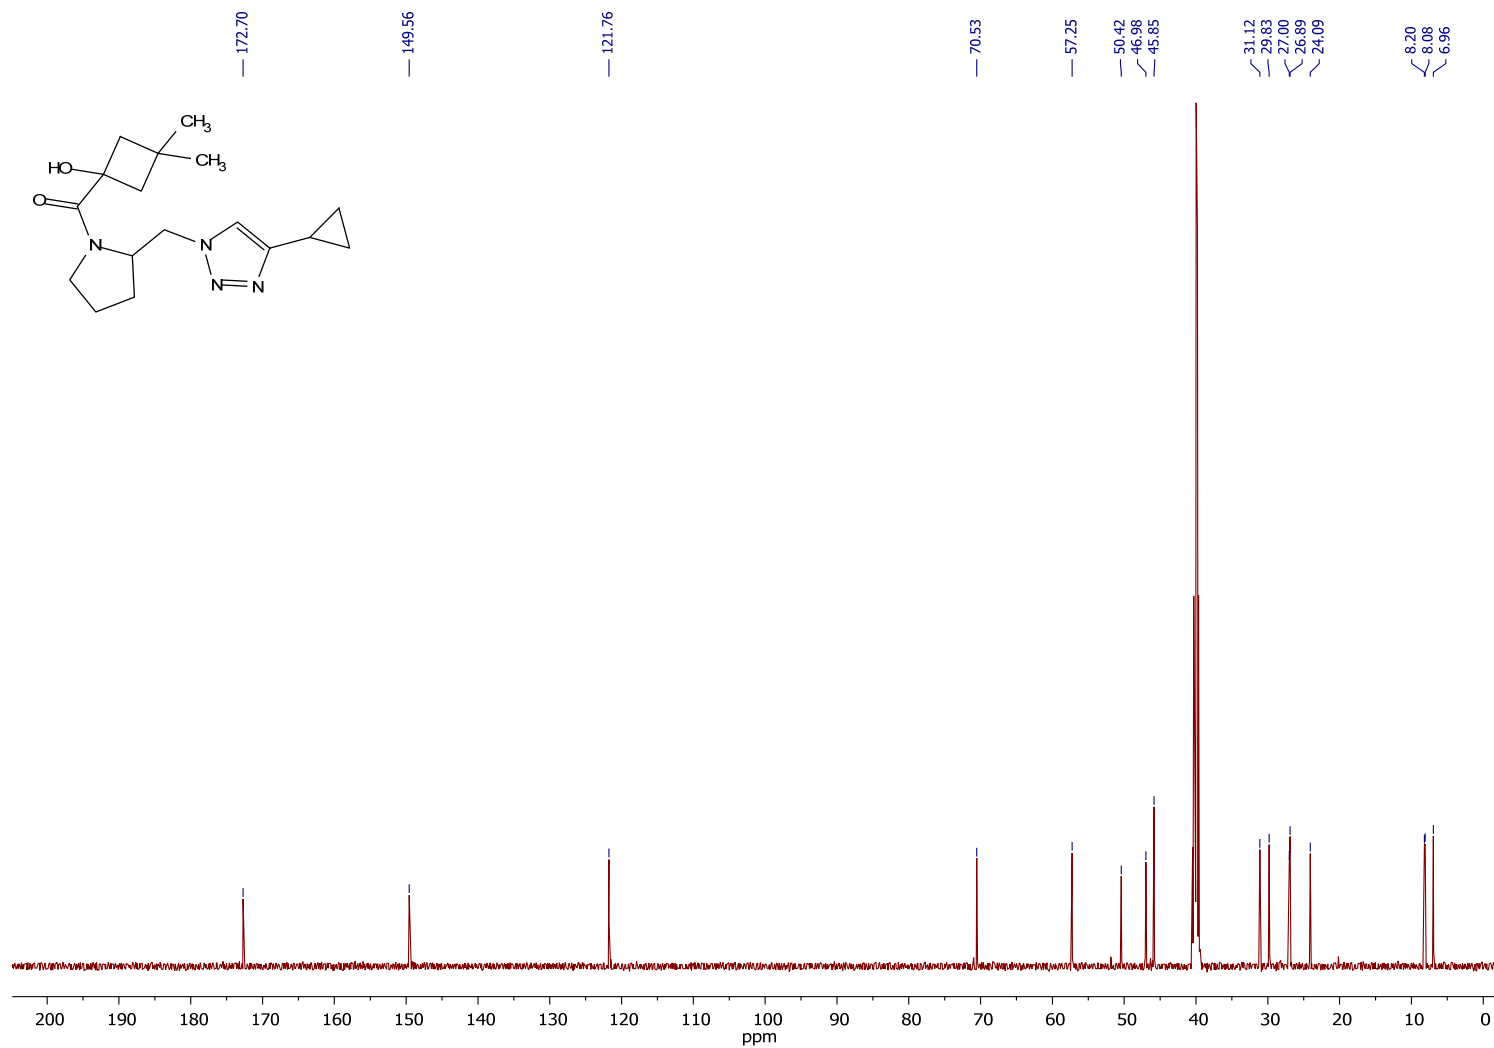

(2-((4-Cyclopropyl-1*H*-1,2,3-triazol-1-yl)methyl)pyrrolidin-1-yl)(1-hydroxy-3,3-dimethylcyclobutyl)methanone (**15**{1,6,6}),  
 $^{13}\text{C}$  NMR (126 MHz,  $\text{DMSO-}d_6$ )

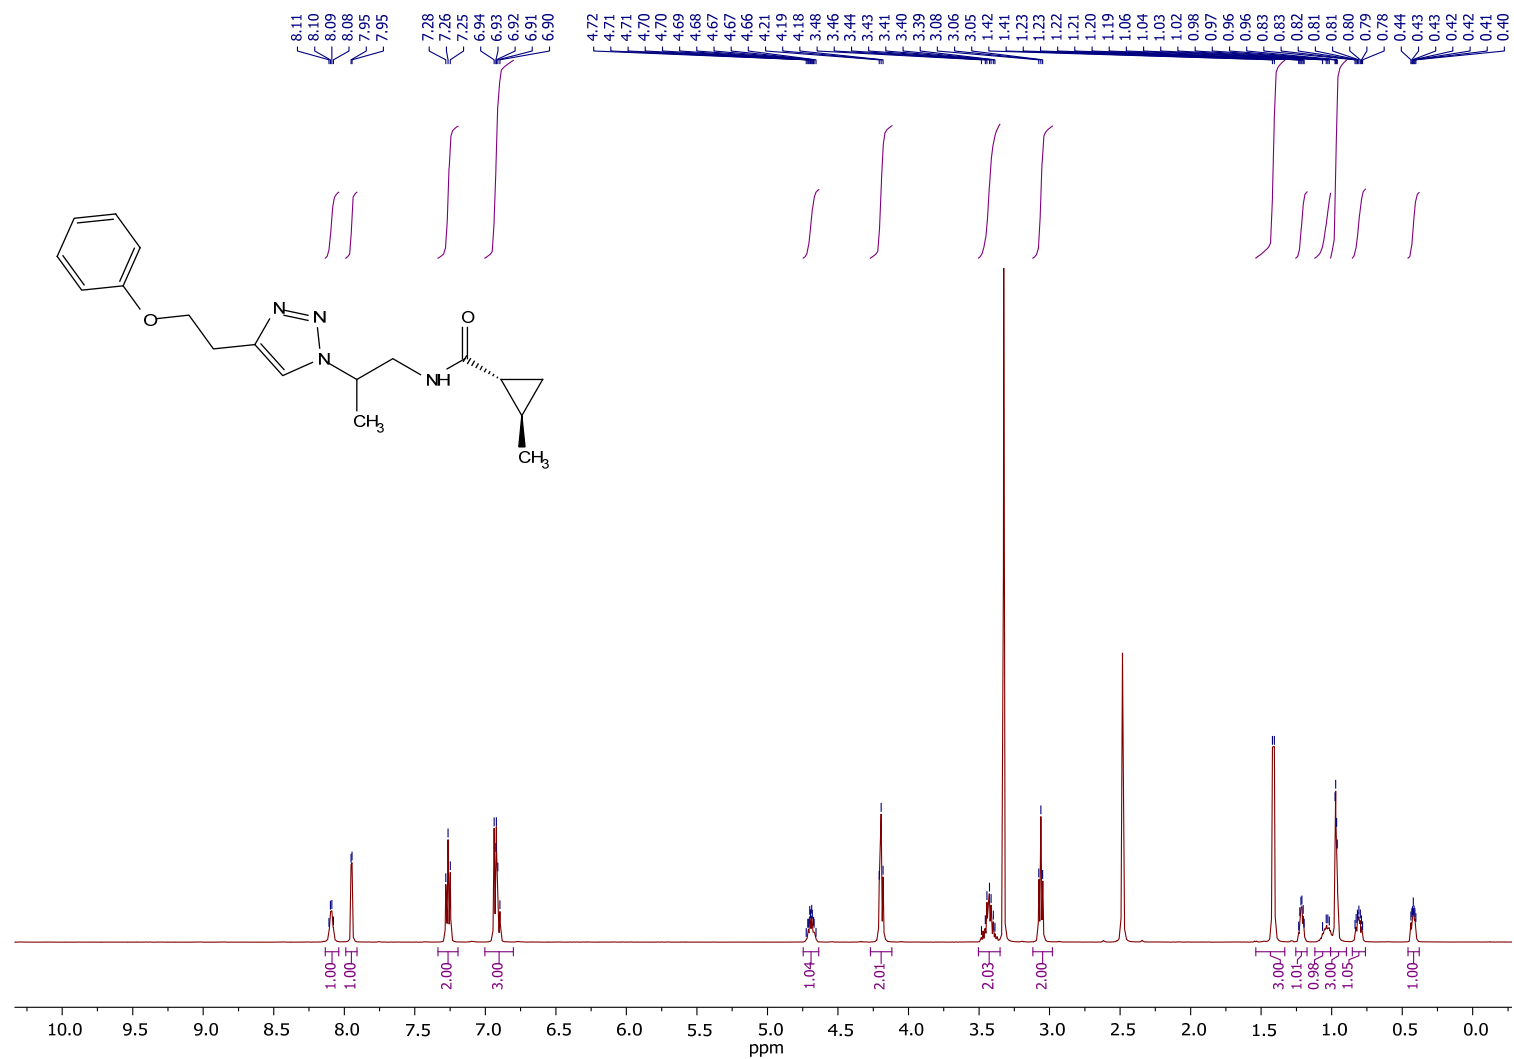

*rac*-(1*R*,2*R*)-2-Methyl-*N*-(2-(4-(2-phenoxyethyl)-1*H*-1,2,3-triazol-1-yl)propyl)cyclopropanecarboxamide (**15**{4,4,4}), <sup>1</sup>H NMR (500 MHz, DMSO-*d*<sub>6</sub>)

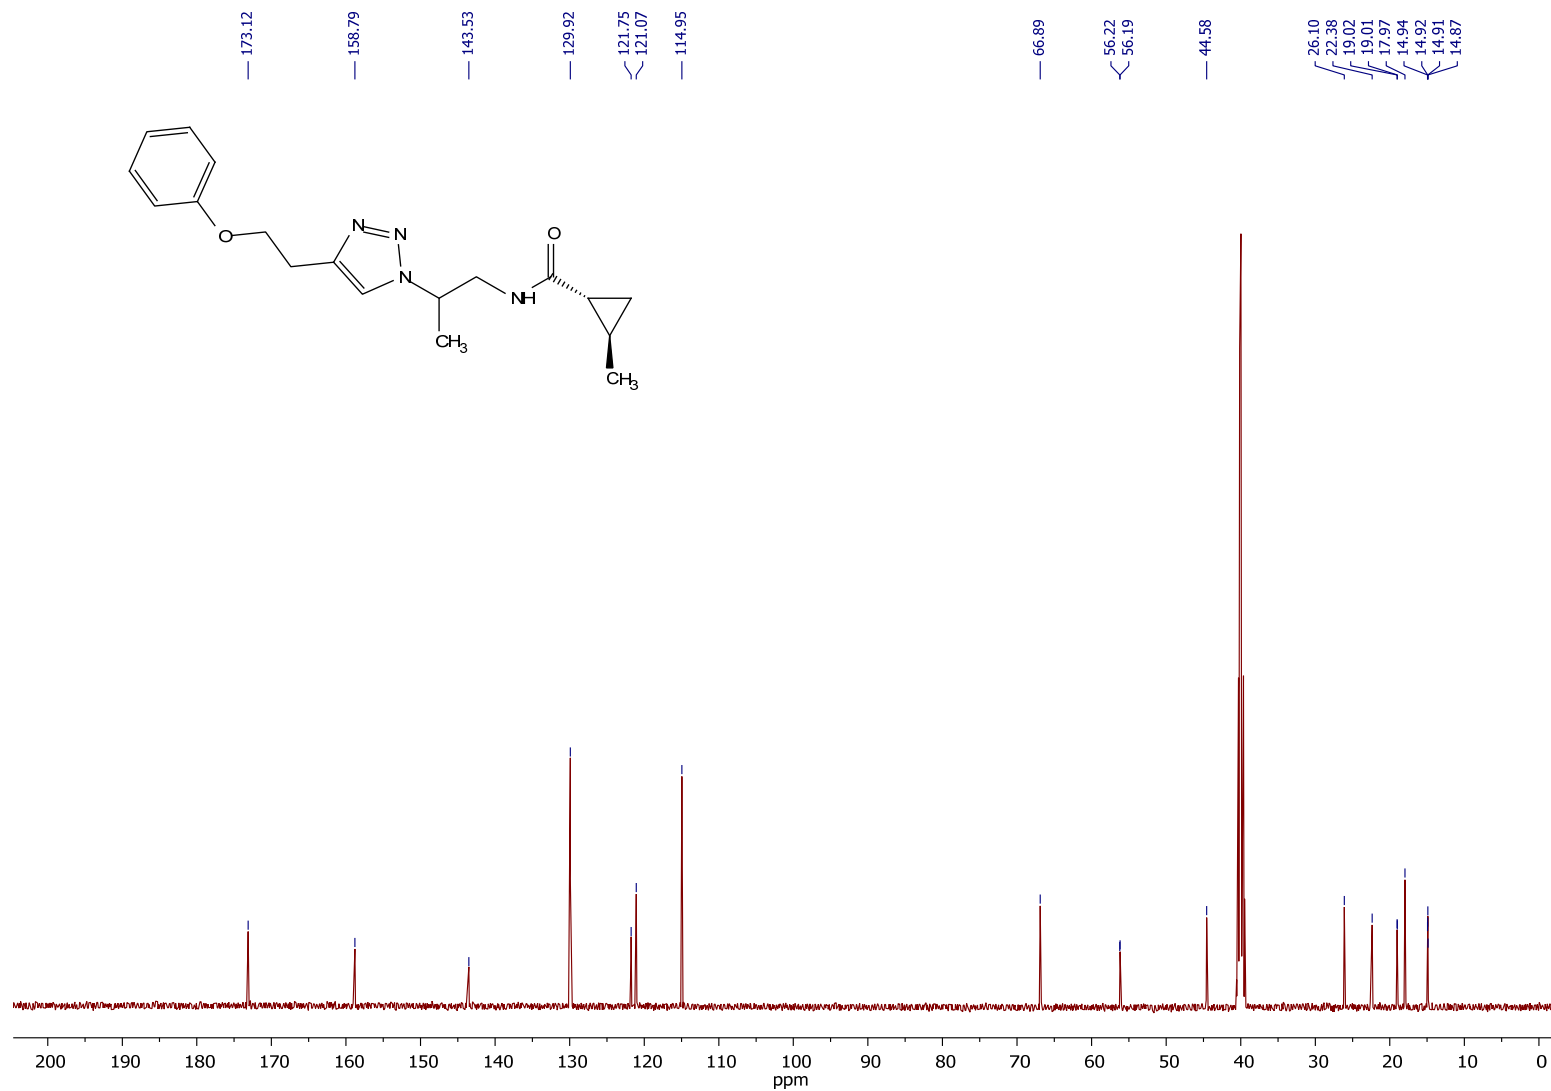

*rac*-(1*R*,2*R*)-2-Methyl-*N*-(2-(4-(2-phenoxyethyl)-1*H*-1,2,3-triazol-1-yl)propyl)cyclopropanecarboxamide (**15**{4,4,4}), <sup>13</sup>C NMR (126 MHz, DMSO-*d*<sub>6</sub>)

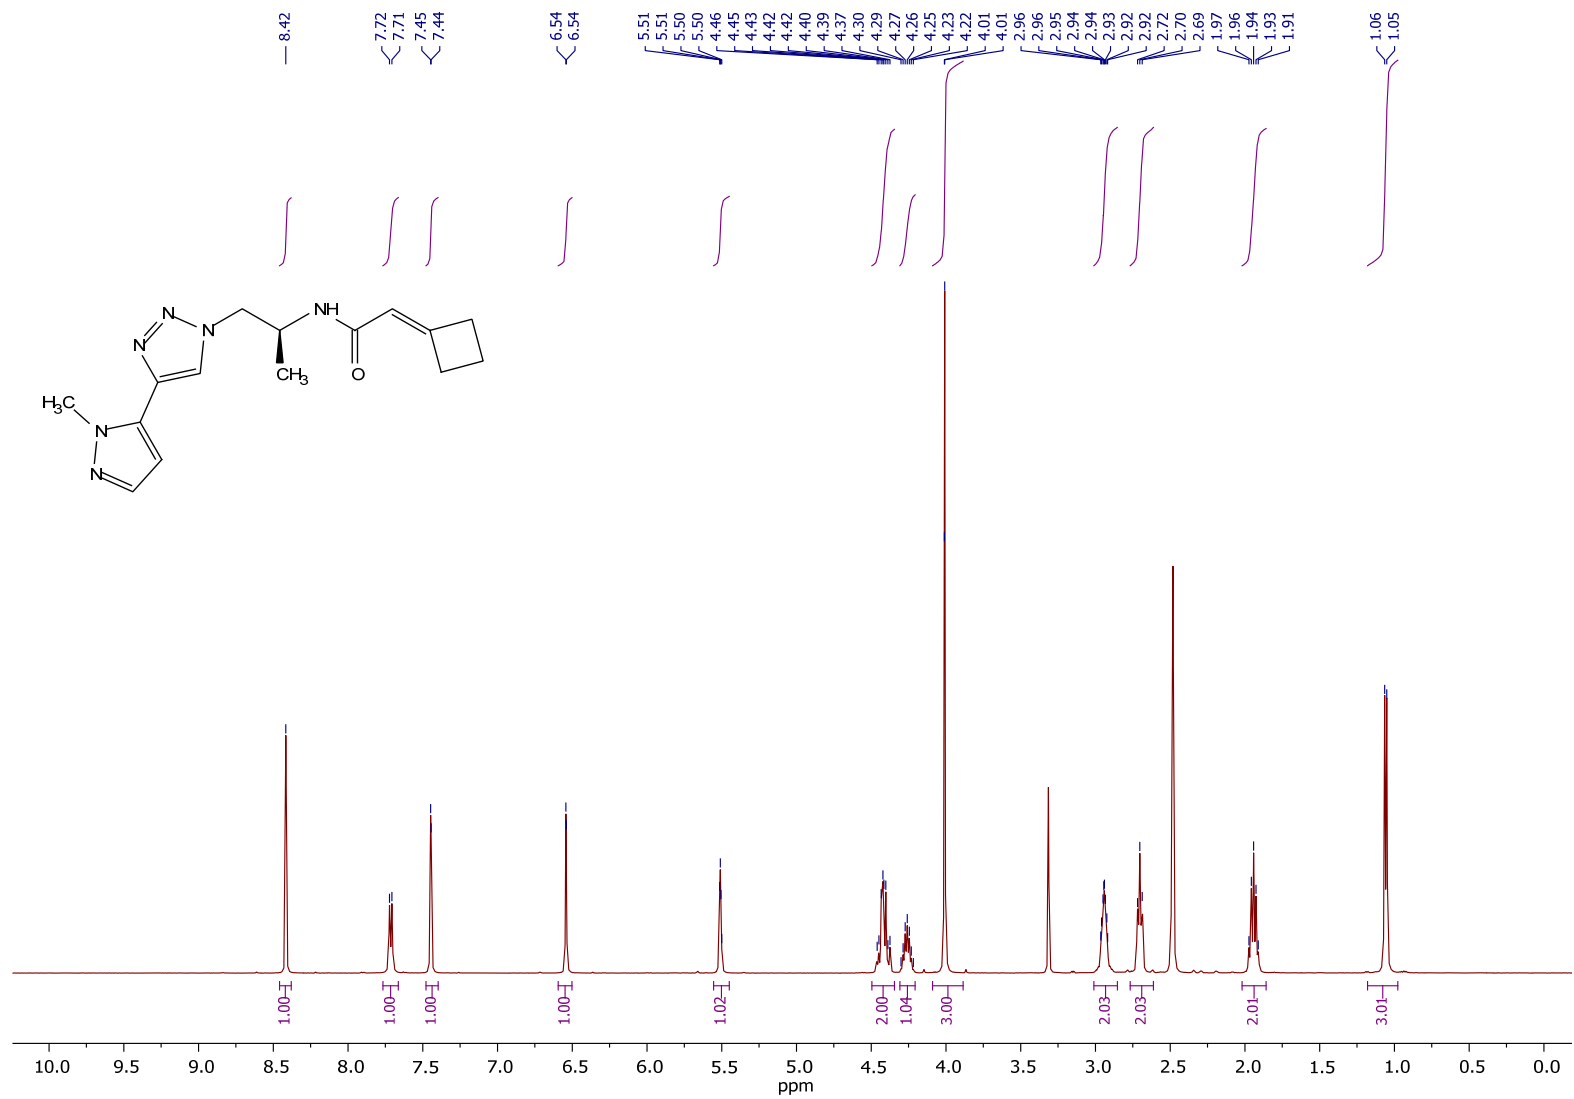

(*S*)-2-Cyclobutylidene-*N*-(1-(4-(1-methyl-1*H*-pyrazol-5-yl)-1*H*-1,2,3-triazol-1-yl)propan-2-yl)acetamide **15** {6,11,11}, <sup>1</sup>H NMR (500 MHz, DMSO-*d*<sub>6</sub>)

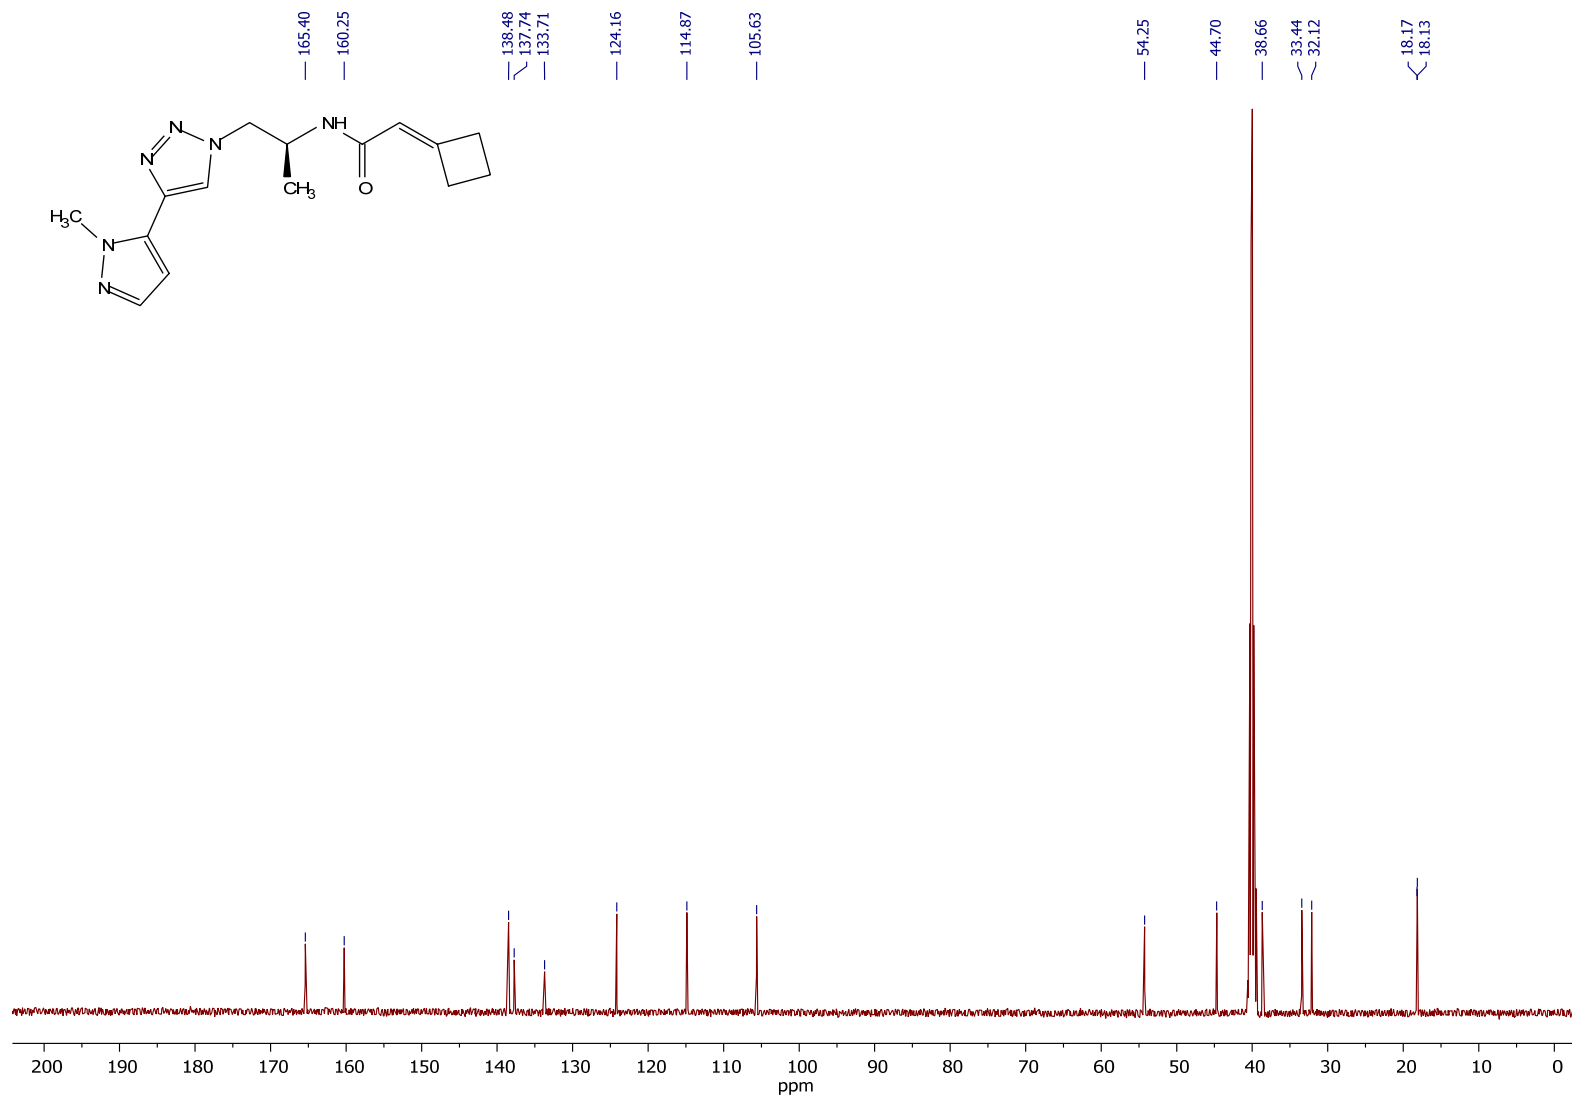

(S)-2-Cyclobutylidene-N-(1-(4-(1-methyl-1H-pyrazol-5-yl)-1H-1,2,3-triazol-1-yl)propan-2-yl)acetamide **15**{6,11,11},  
<sup>13</sup>C NMR (126 MHz, DMSO-d<sub>6</sub>)

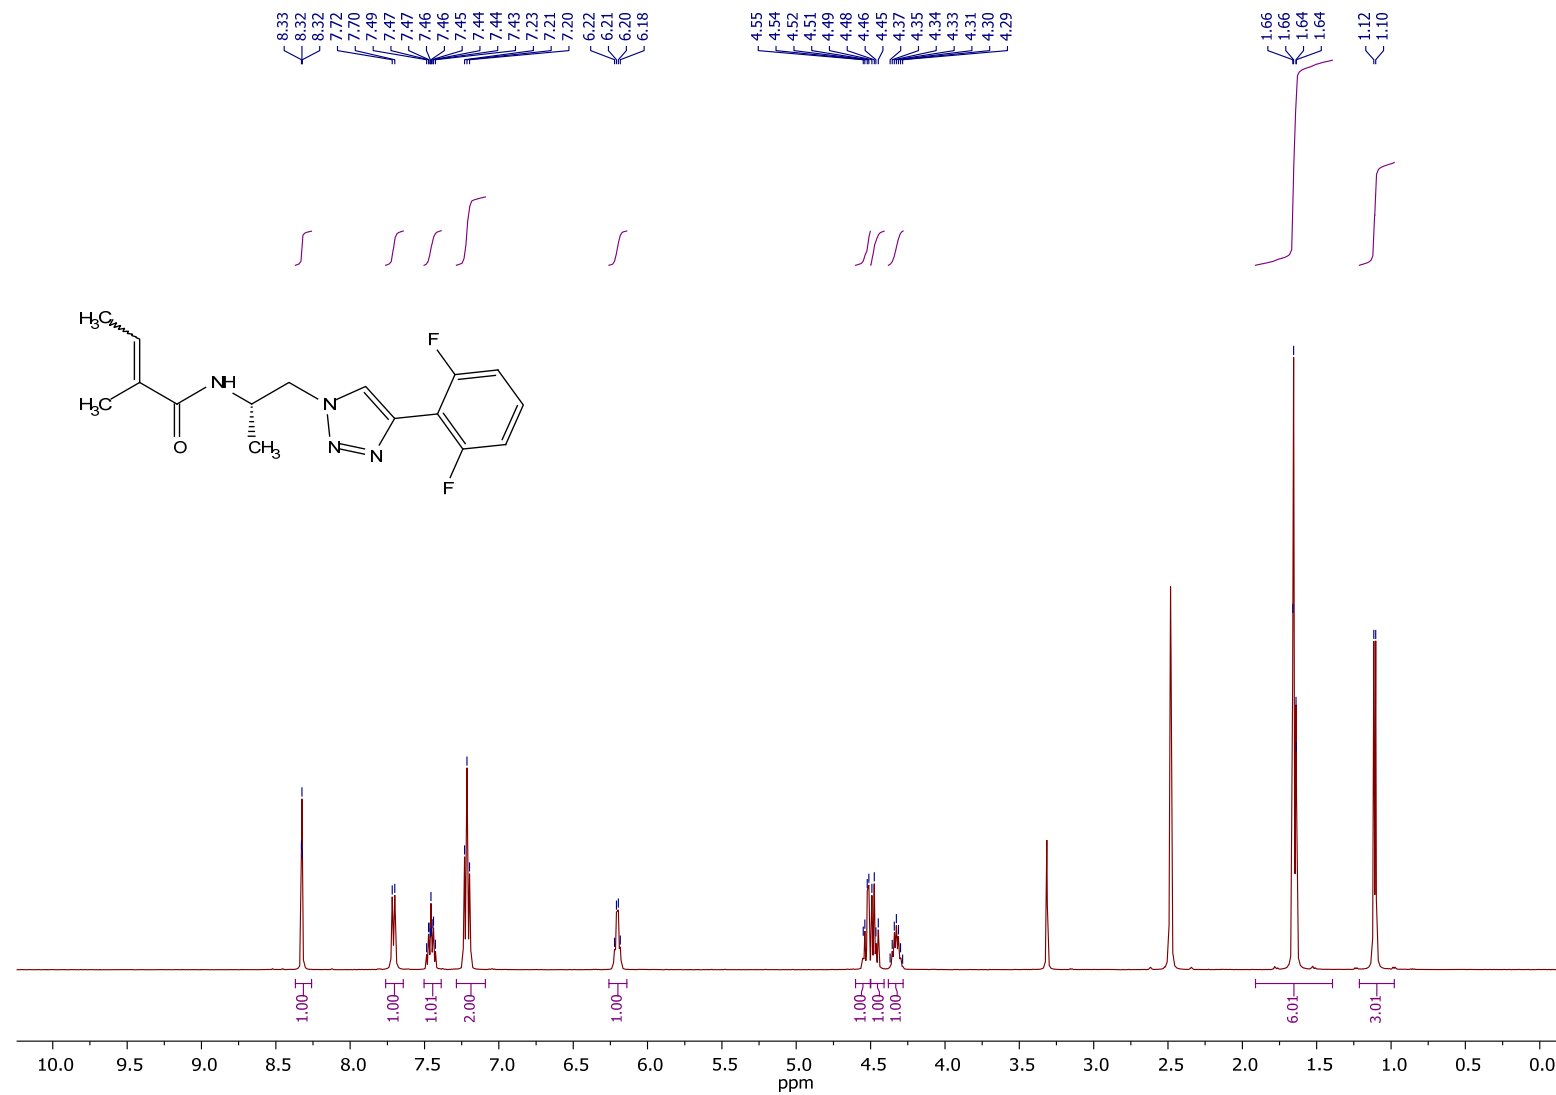

(S)-N-(1-(4-(2,6-Difluorophenyl)-1H-1,2,3-triazol-1-yl)propan-2-yl)-2-methylbut-2-enamide (**15**{6,1,8}), <sup>1</sup>H NMR (500 MHz, DMSO-*d*<sub>6</sub>)

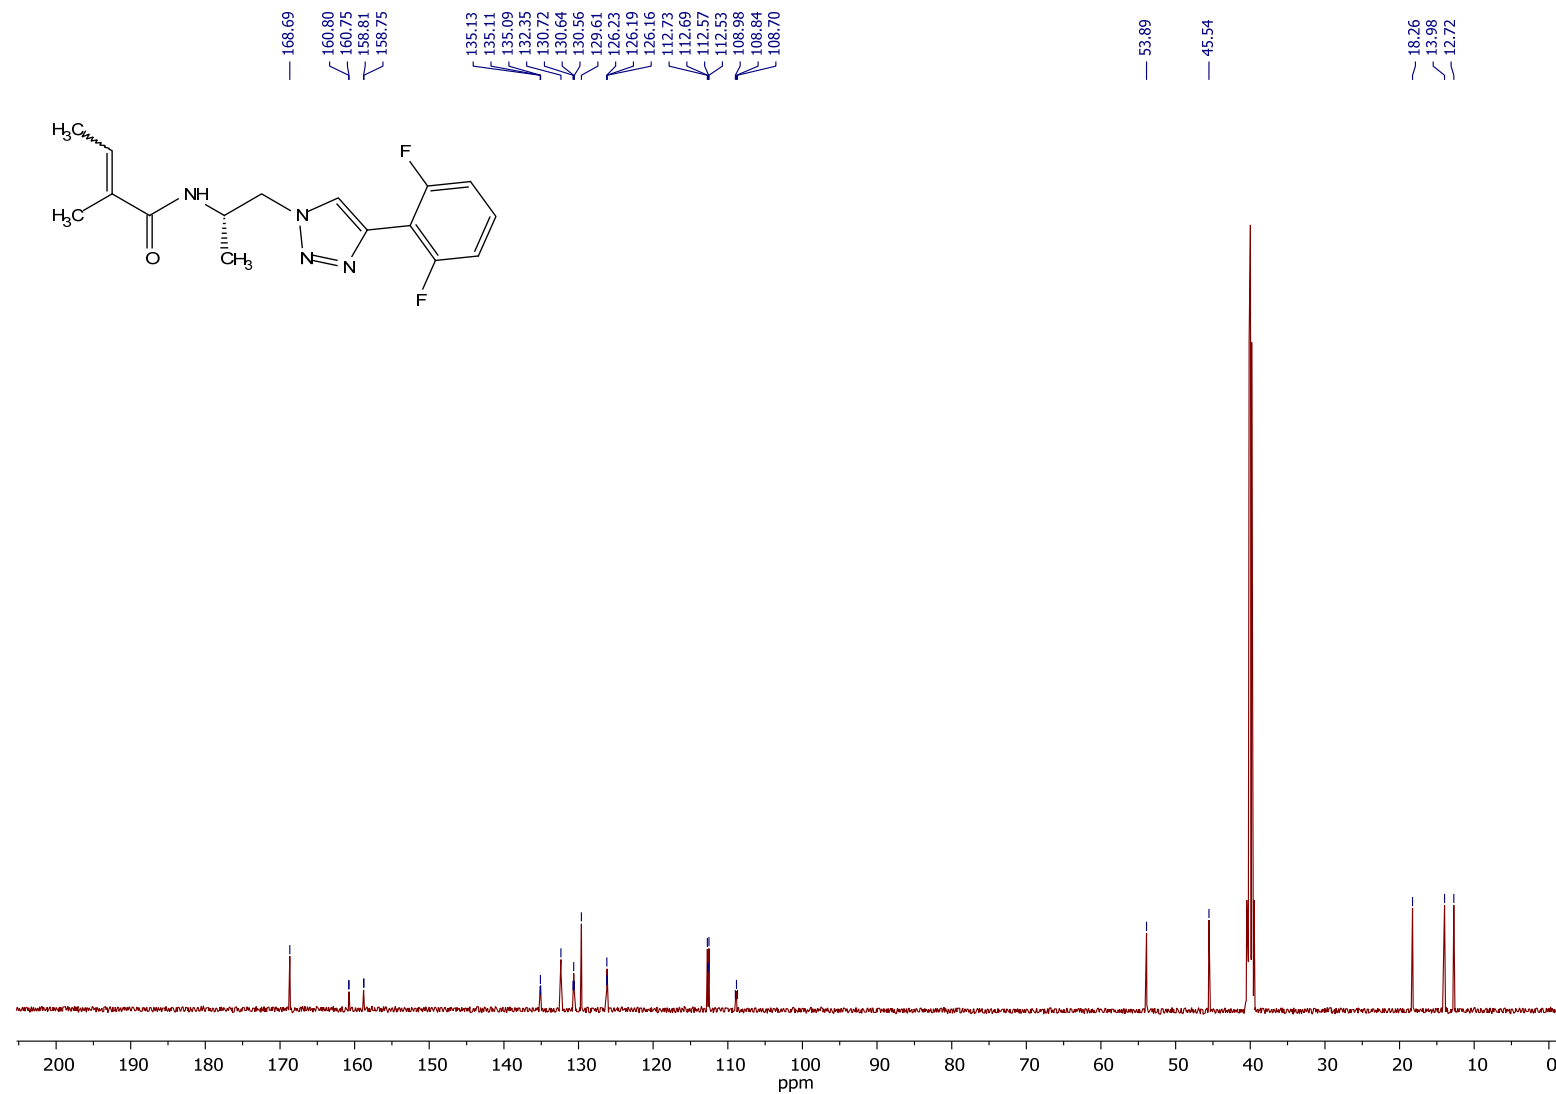

(S)-N-(1-(4-(2,6-Difluorophenyl)-1H-1,2,3-triazol-1-yl)propan-2-yl)-2-methylbut-2-enamide (**15**{6,1,8}),  $^{13}\text{C}$  NMR (126 MHz,  $\text{DMSO-}d_6$ )



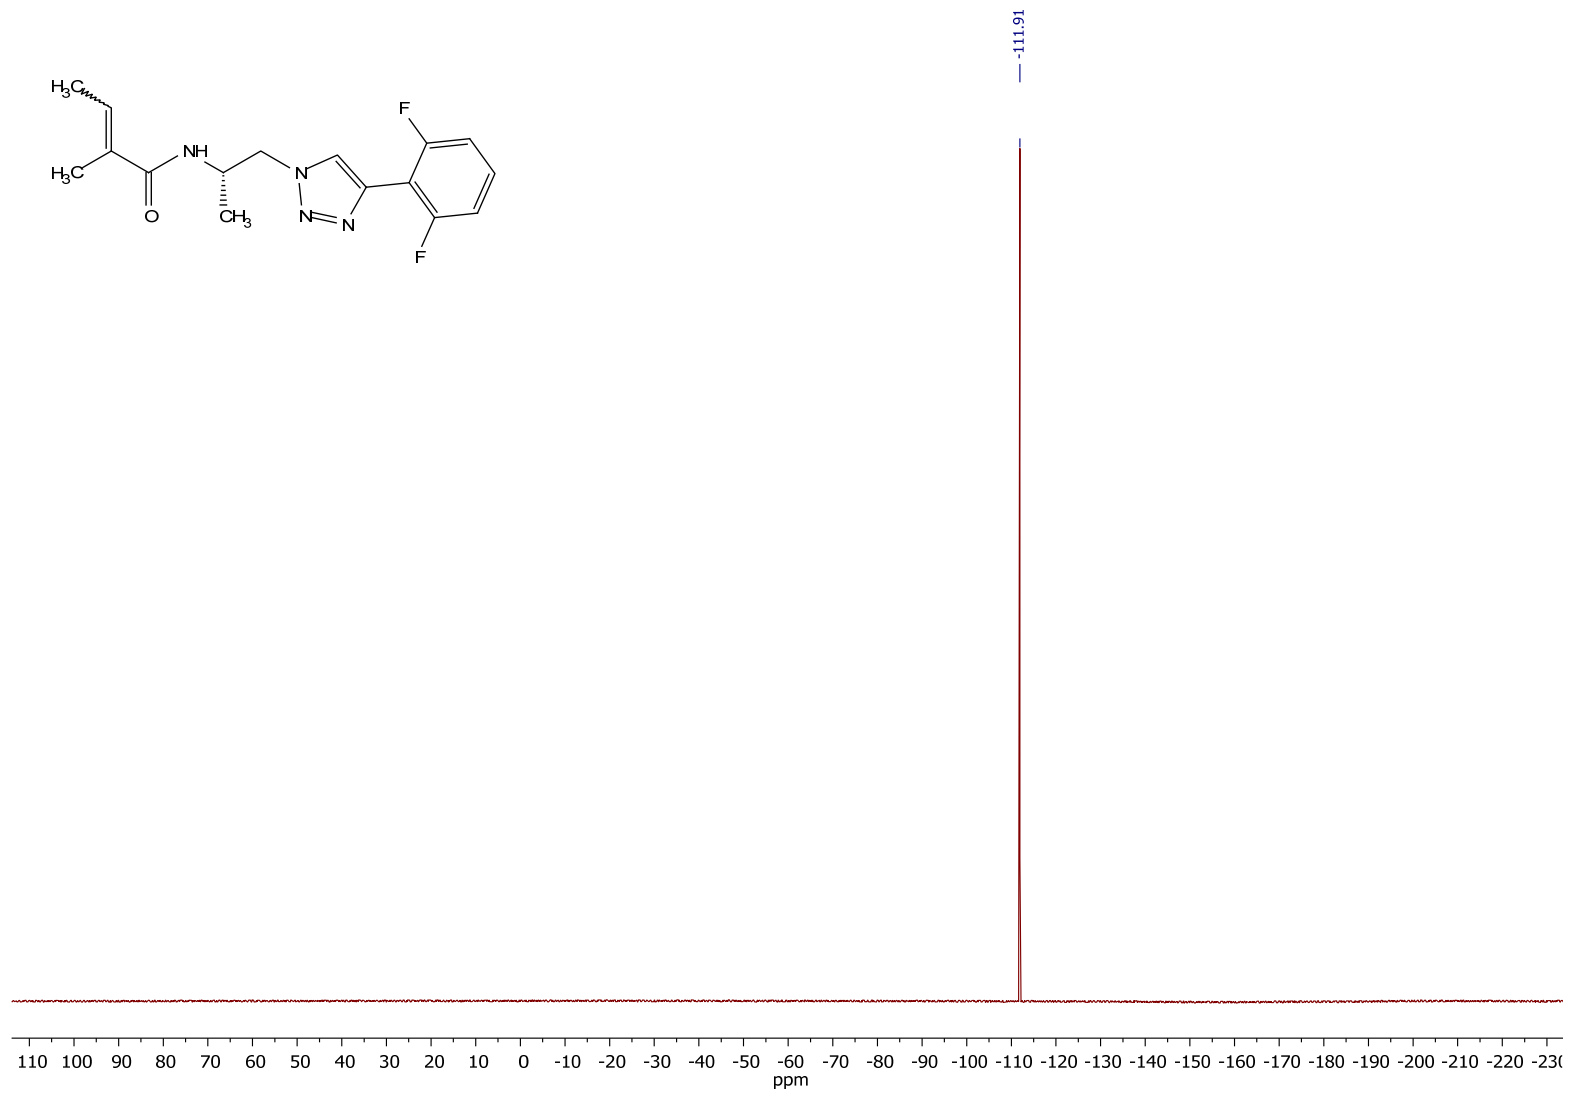

(S)-N-(1-(4-(2,6-Difluorophenyl)-1H-1,2,3-triazol-1-yl)propan-2-yl)-2-methylbut-2-enamide (**15**{6,1,8}), <sup>19</sup>F NMR (376 MHz, DMSO-*d*<sub>6</sub>)

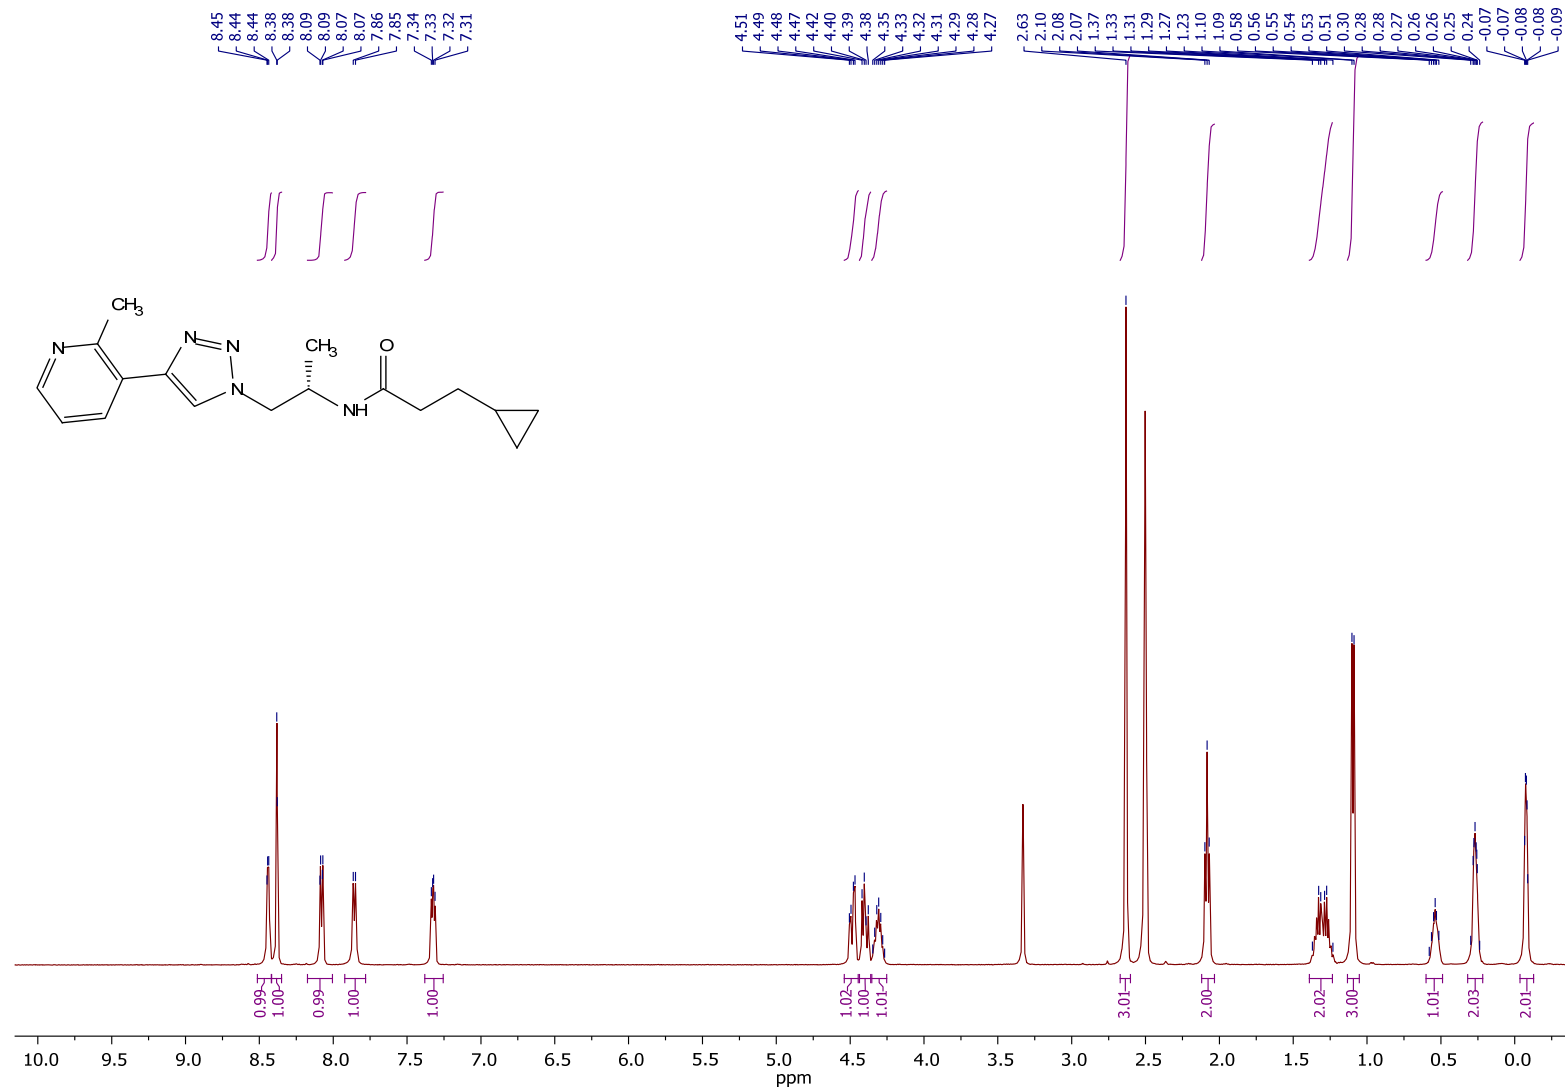

(S)-3-Cyclopropyl-N-(1-(4-(2-methylpyridin-3-yl)-1H-1,2,3-triazol-1-yl)propan-2-yl)propanamide (**15**{6,27,27}), <sup>1</sup>H NMR (500 MHz, DMSO-d<sub>6</sub>)

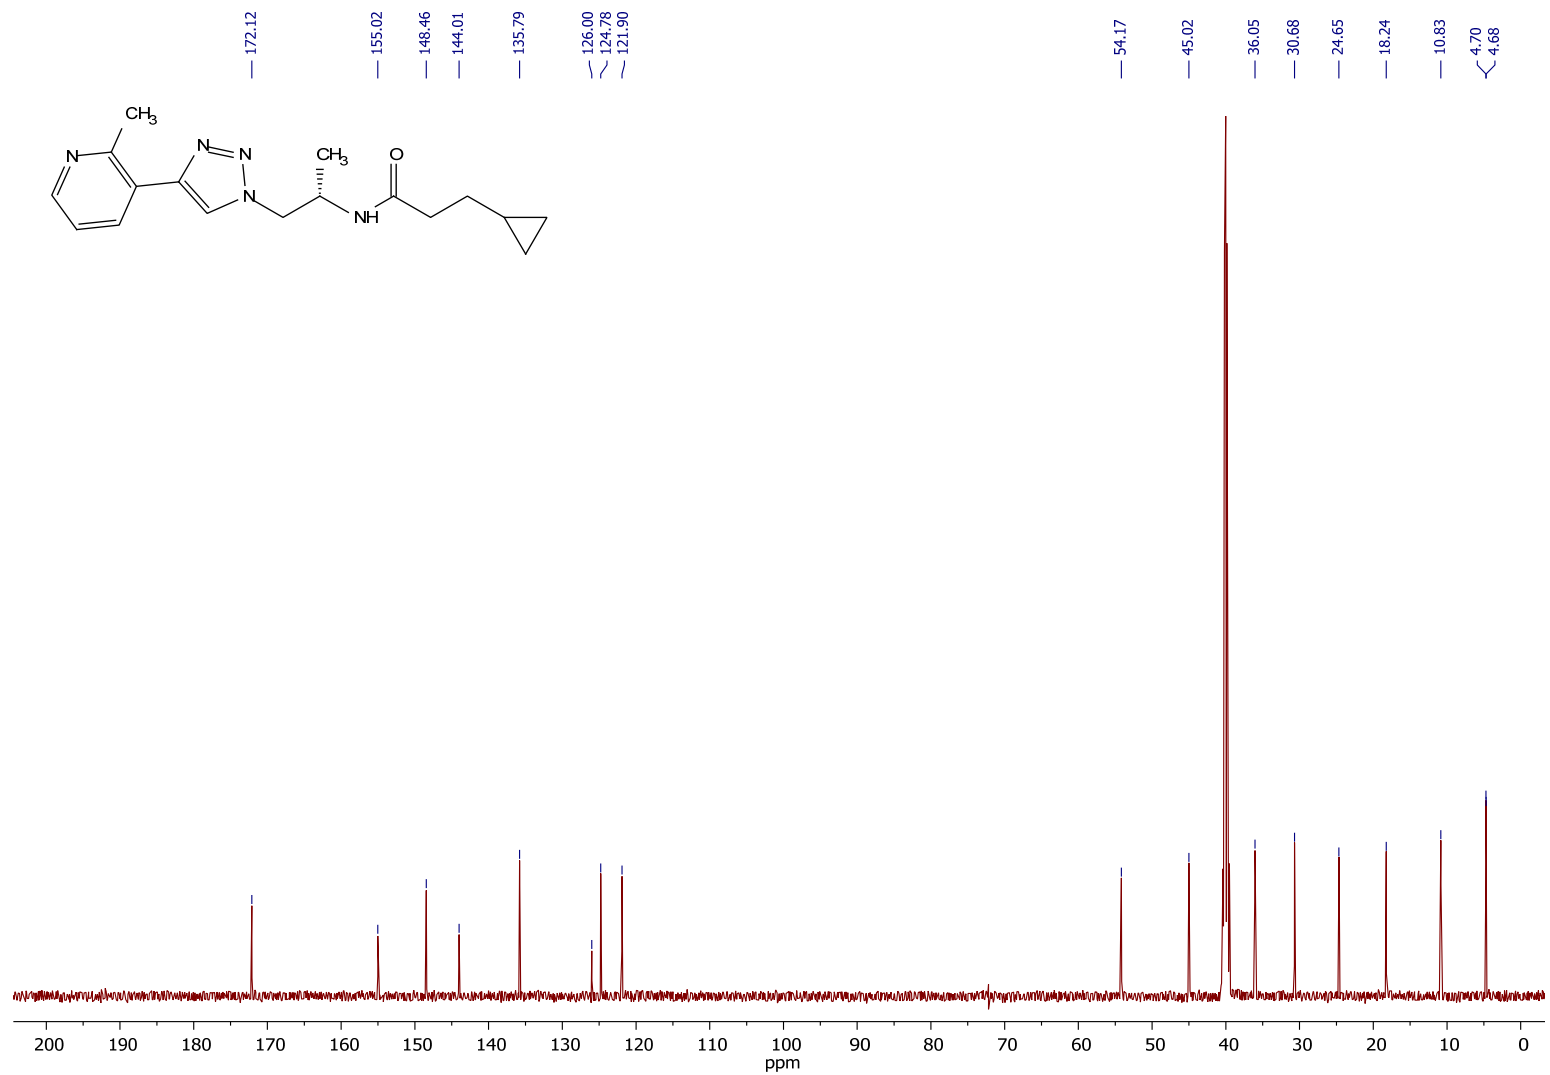

(*S*)-3-Cyclopropyl-*N*-(1-(4-(2-methylpyridin-3-yl)-1*H*-1,2,3-triazol-1-yl)propan-2-yl)propanamide (**15**{6,27,27}), <sup>13</sup>C NMR (126 MHz, DMSO-*d*<sub>6</sub>)

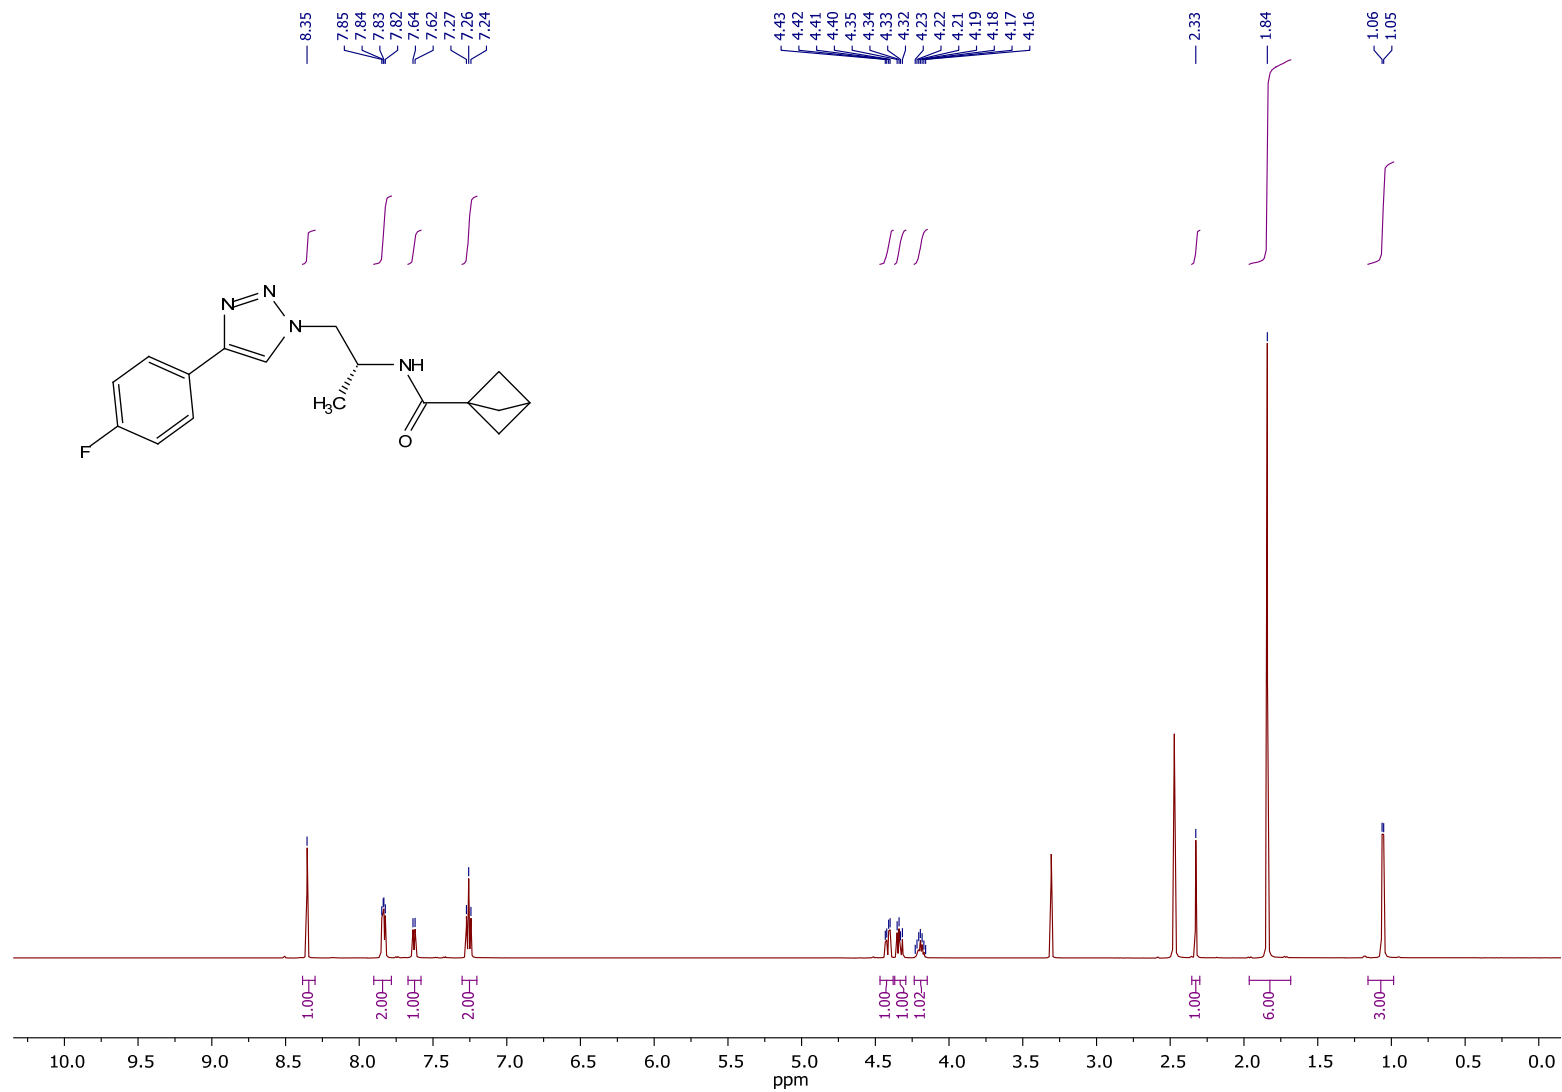

*(R)*-*N*-(1-(4-(4-Fluorophenyl)-1*H*-1,2,3-triazol-1-yl)propan-2-yl)bicyclo[1.1.1]pentane-1-carboxamide (**15**{2,2,2}), <sup>1</sup>H NMR (600 MHz, DMSO-*d*<sub>6</sub>)

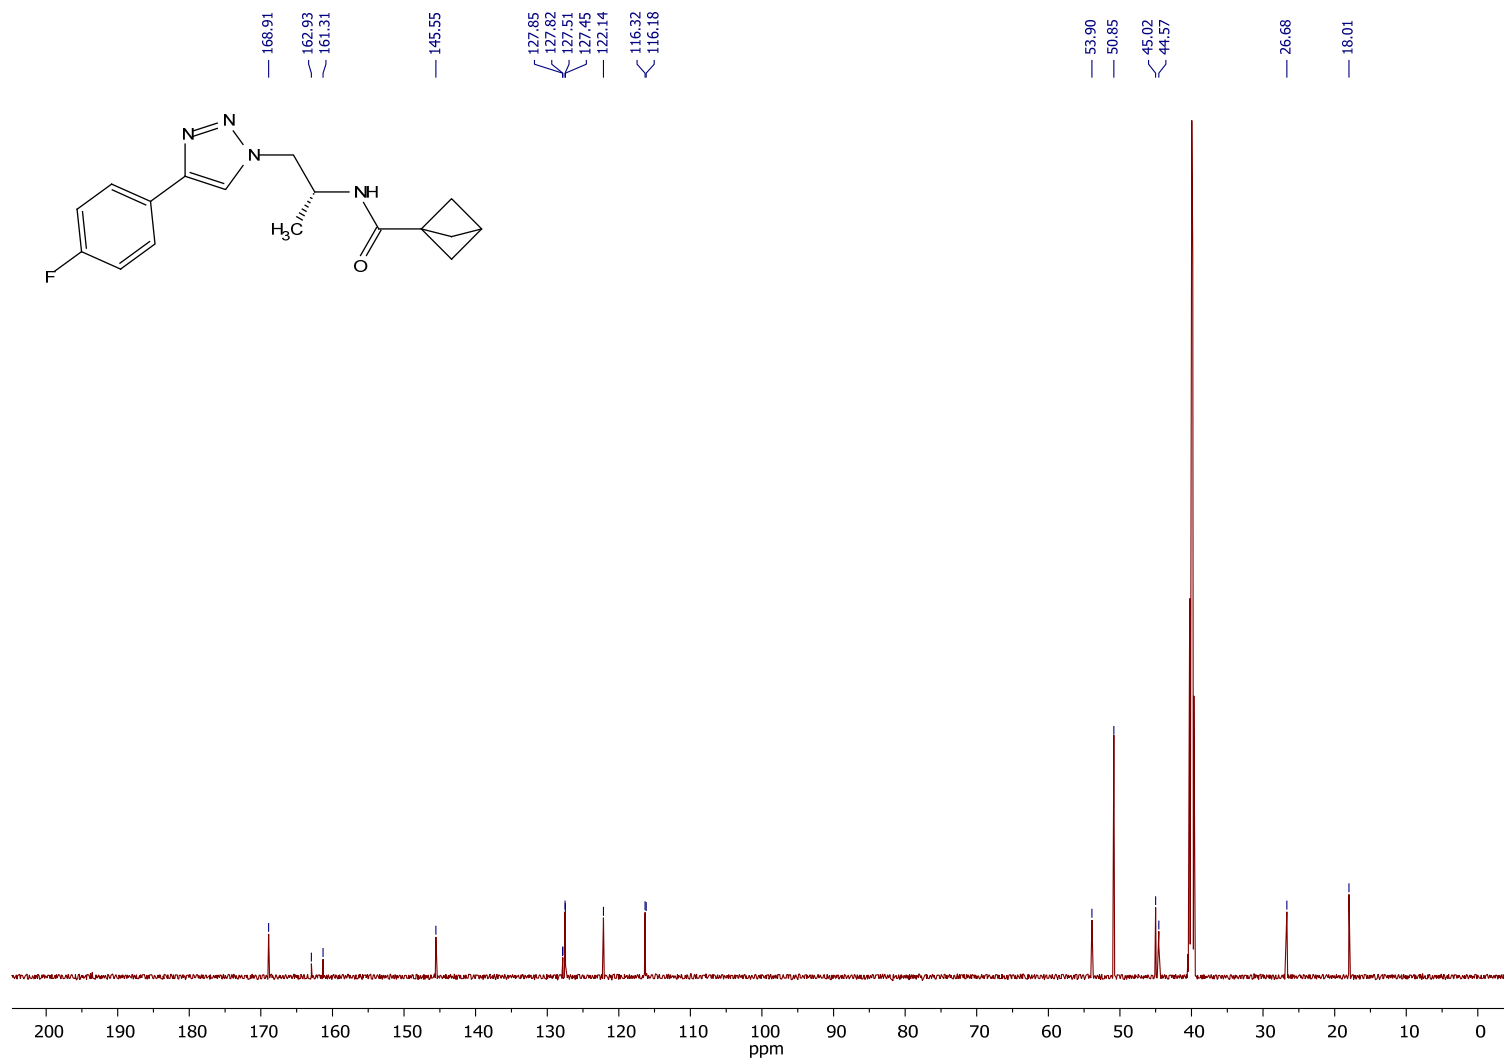

*(R)*-*N*-(1-(4-(4-Fluorophenyl)-1*H*-1,2,3-triazol-1-yl)propan-2-yl)bicyclo[1.1.1]pentane-1-carboxamide (**15**{2,2,2}), <sup>13</sup>C NMR (151 MHz, DMSO-*d*<sub>6</sub>)

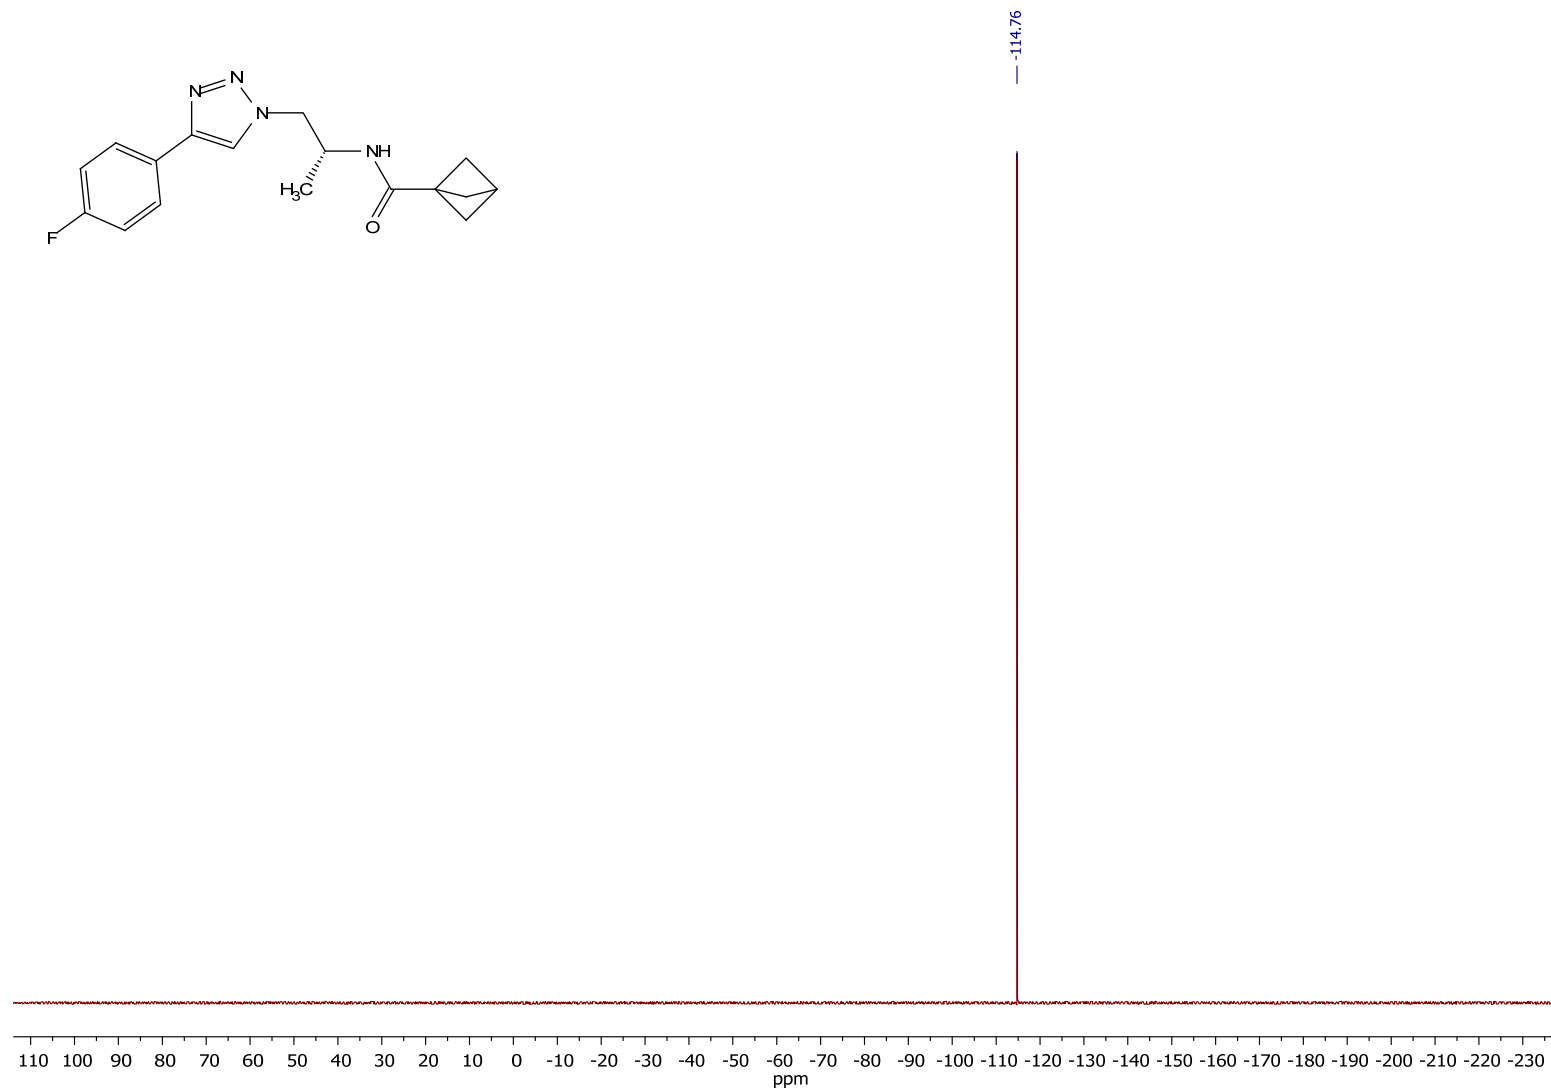

**(R)-N-(1-(4-(4-Fluorophenyl)-1H-1,2,3-triazol-1-yl)propan-2-yl)bicyclo[1.1.1]pentane-1-carboxamide (15{2,2,2}),  $^{19}\text{F}$  NMR (376 MHz, DMSO)**

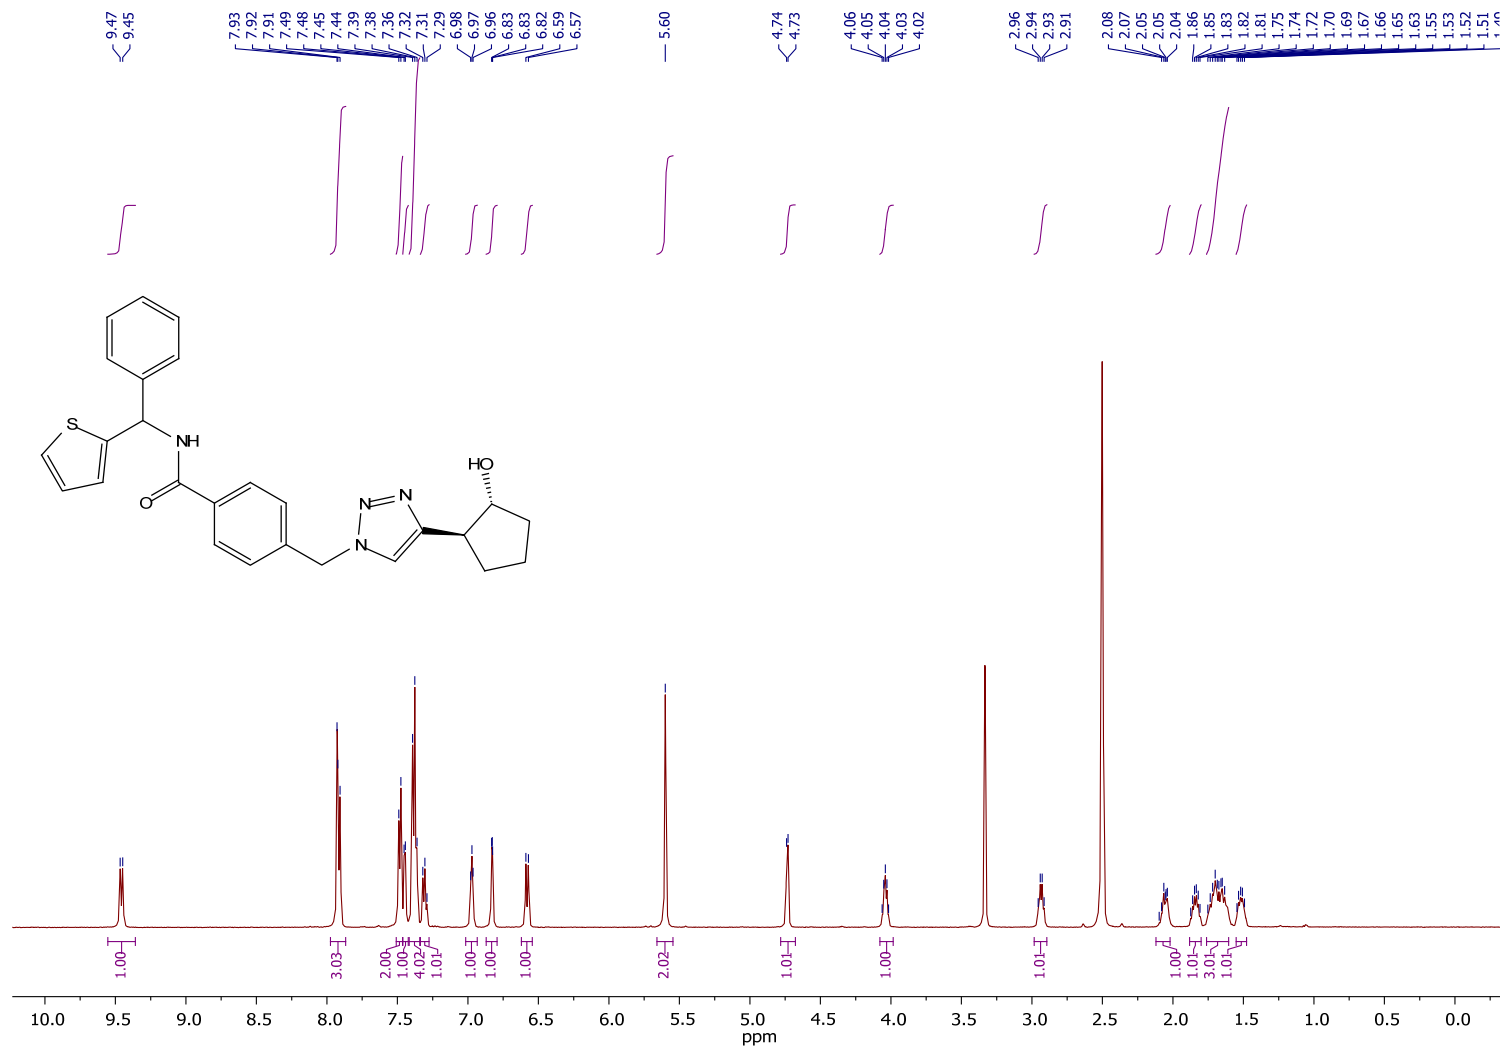

*rac*-4-((4-((1*R*,2*S*)-2-Hydroxycyclopentyl)-1*H*-1,2,3-triazol-1-yl)methyl)-*N*-(phenyl(thiophen-2-yl)methyl)benzamide (**15**{1,2,17}),  
<sup>1</sup>H NMR (500 MHz, DMSO-*d*<sub>6</sub>)

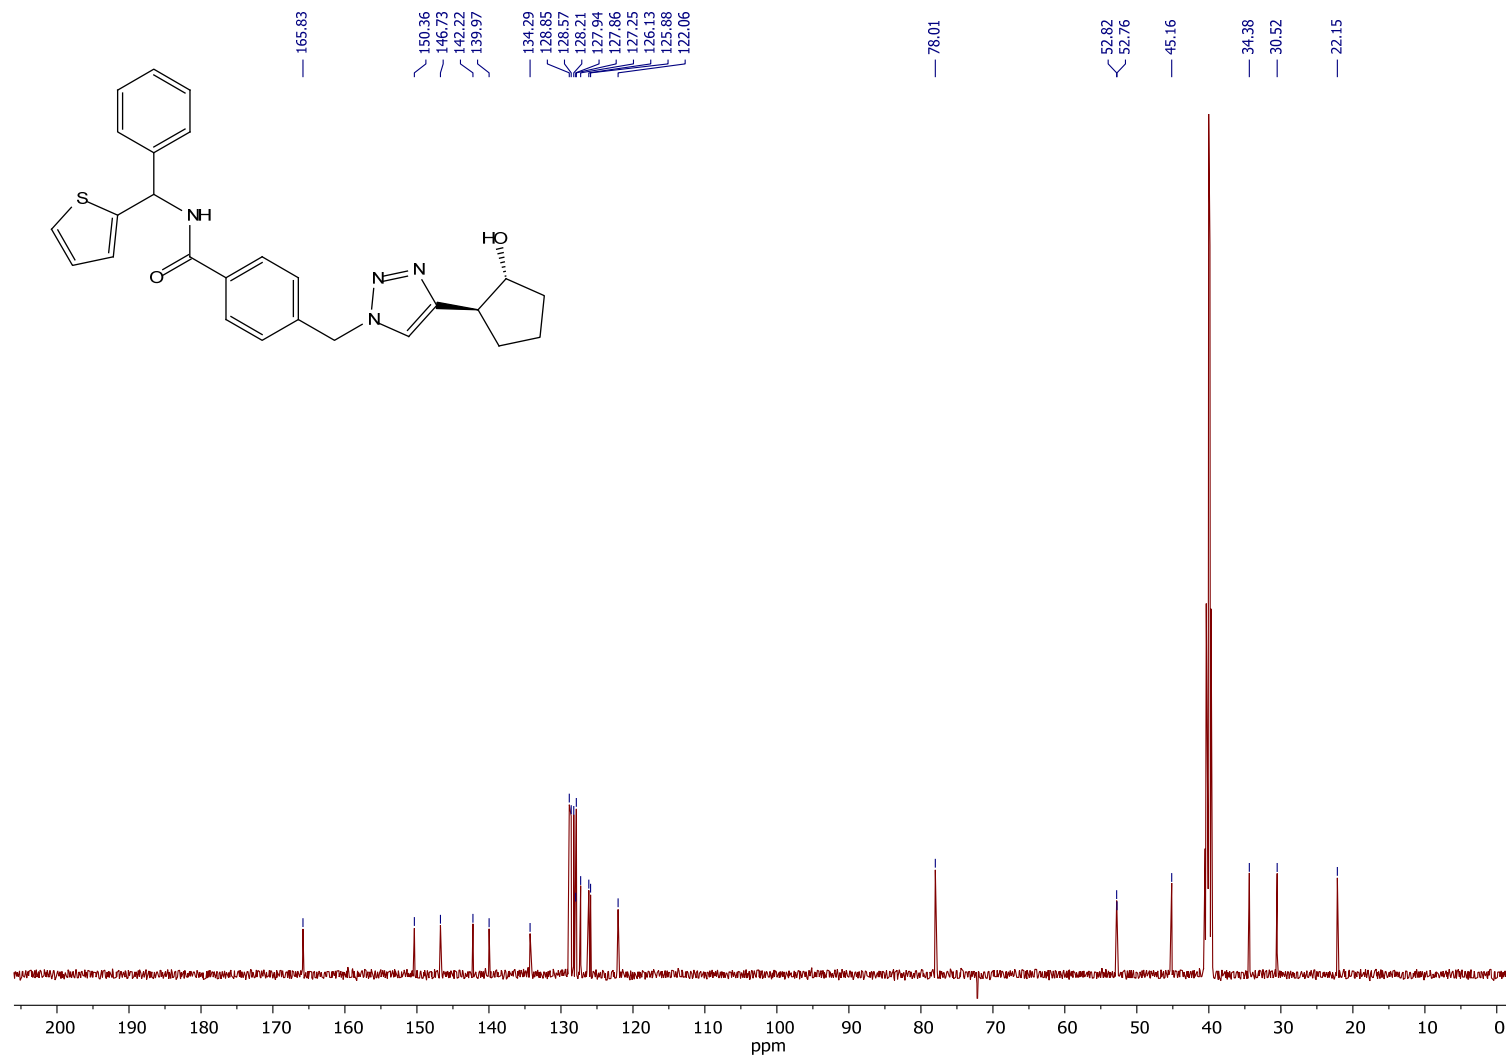

*rac*-4-((4-((1*R*,2*S*)-2-Hydroxycyclopentyl)-1*H*-1,2,3-triazol-1-yl)methyl)-*N*-(phenyl(thiophen-2-yl)methyl)benzamide (**15**<sub>{1,2,17}</sub>),  
<sup>13</sup>C NMR (126 MHz, DMSO-*d*<sub>6</sub>)



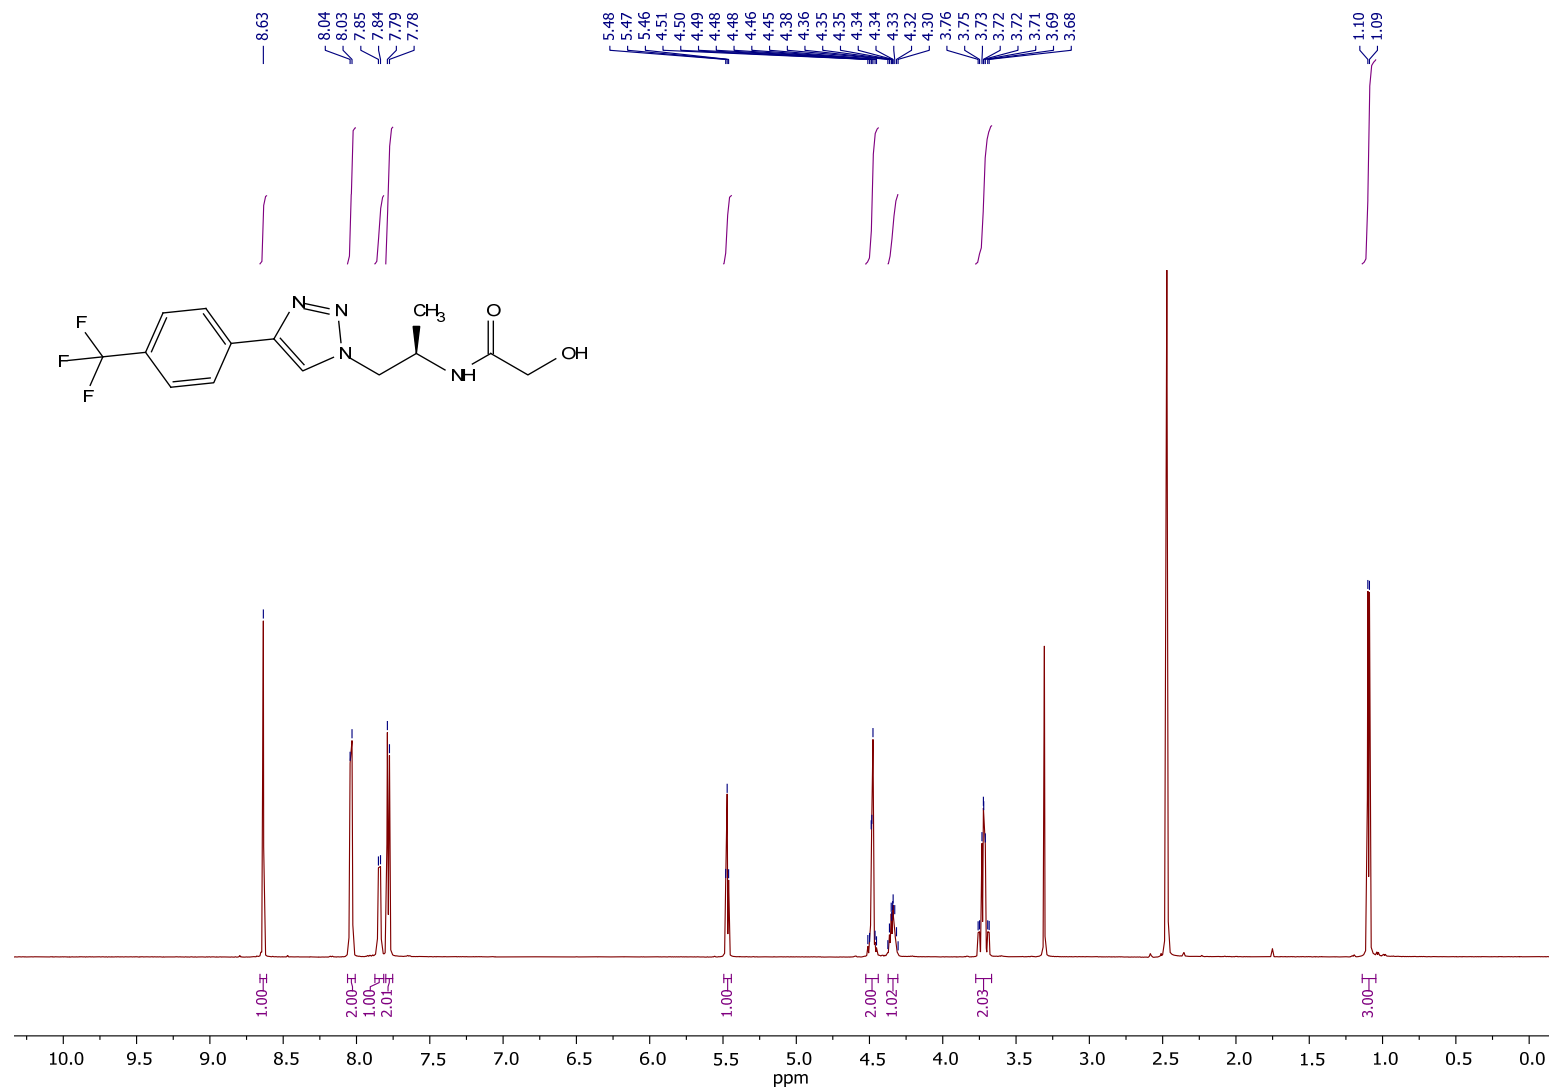

(*R*)-2-Hydroxy-*N*-(1-(4-(4-(trifluoromethyl)phenyl)-1*H*-1,2,3-triazol-1-yl)propan-2-yl)acetamide **15** {2,30,29}, <sup>1</sup>H NMR (600 MHz, DMSO-*d*<sub>6</sub>)

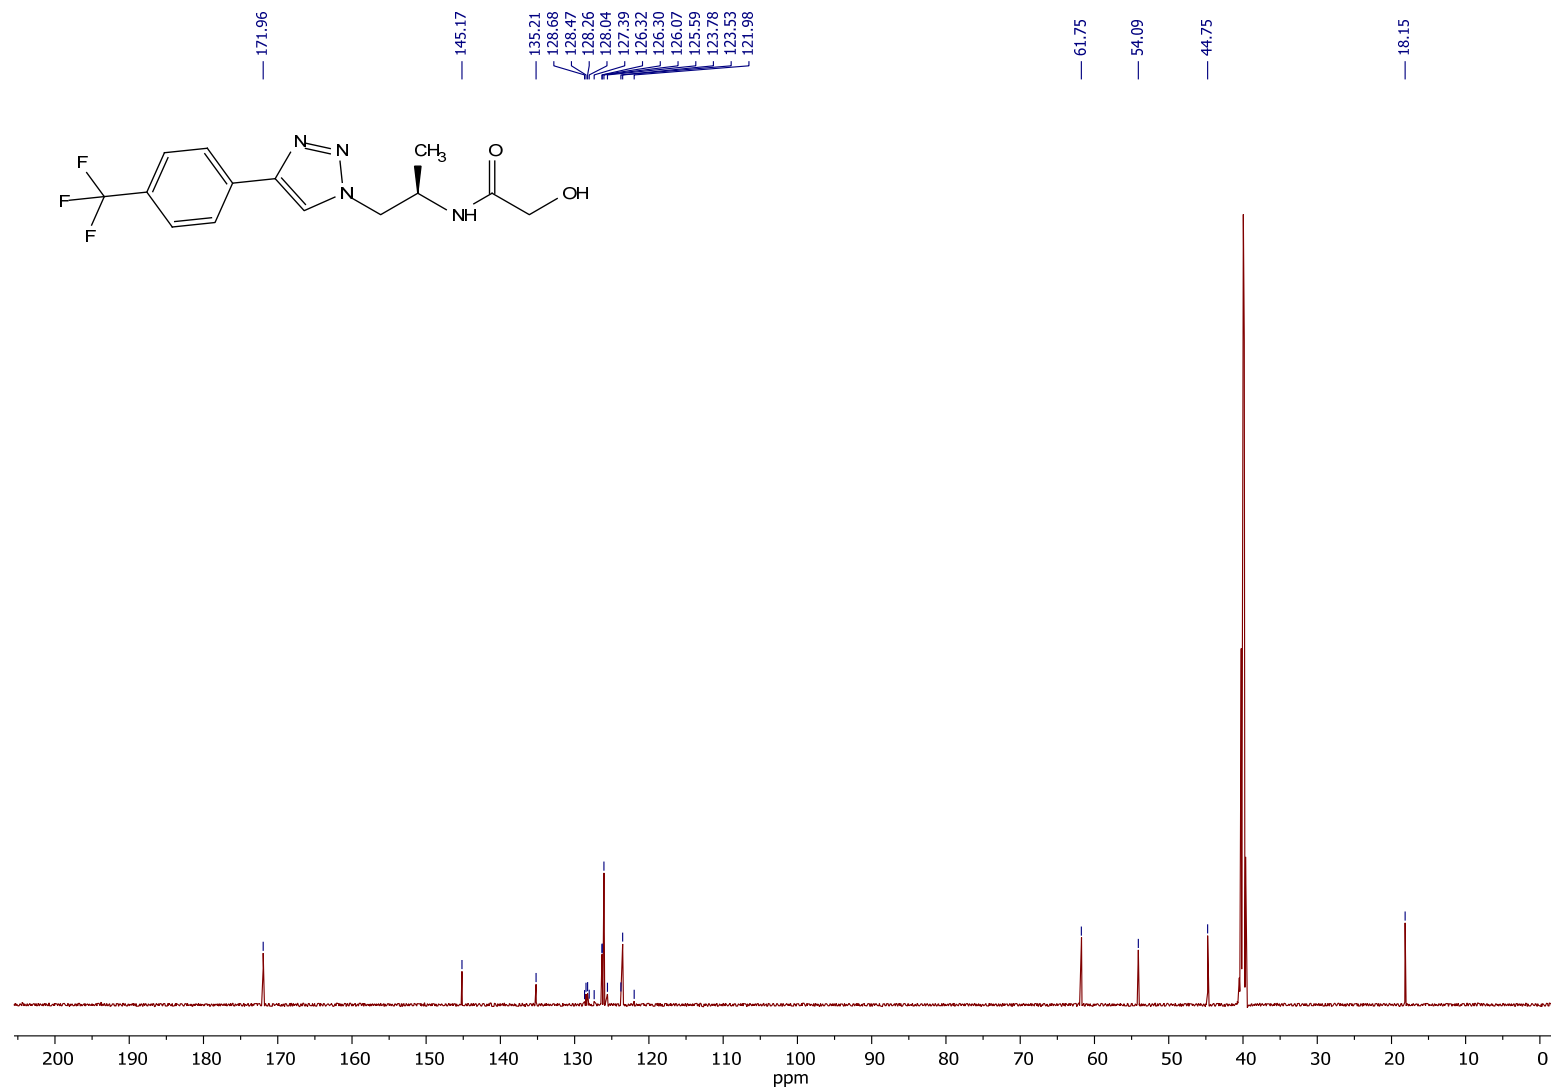

(*R*)-2-Hydroxy-*N*-(1-(4-(4-(trifluoromethyl)phenyl)-1*H*-1,2,3-triazol-1-yl)propan-2-yl)acetamide **15**{2,30,29}, <sup>13</sup>C NMR (151 MHz, DMSO-*d*<sub>6</sub>)

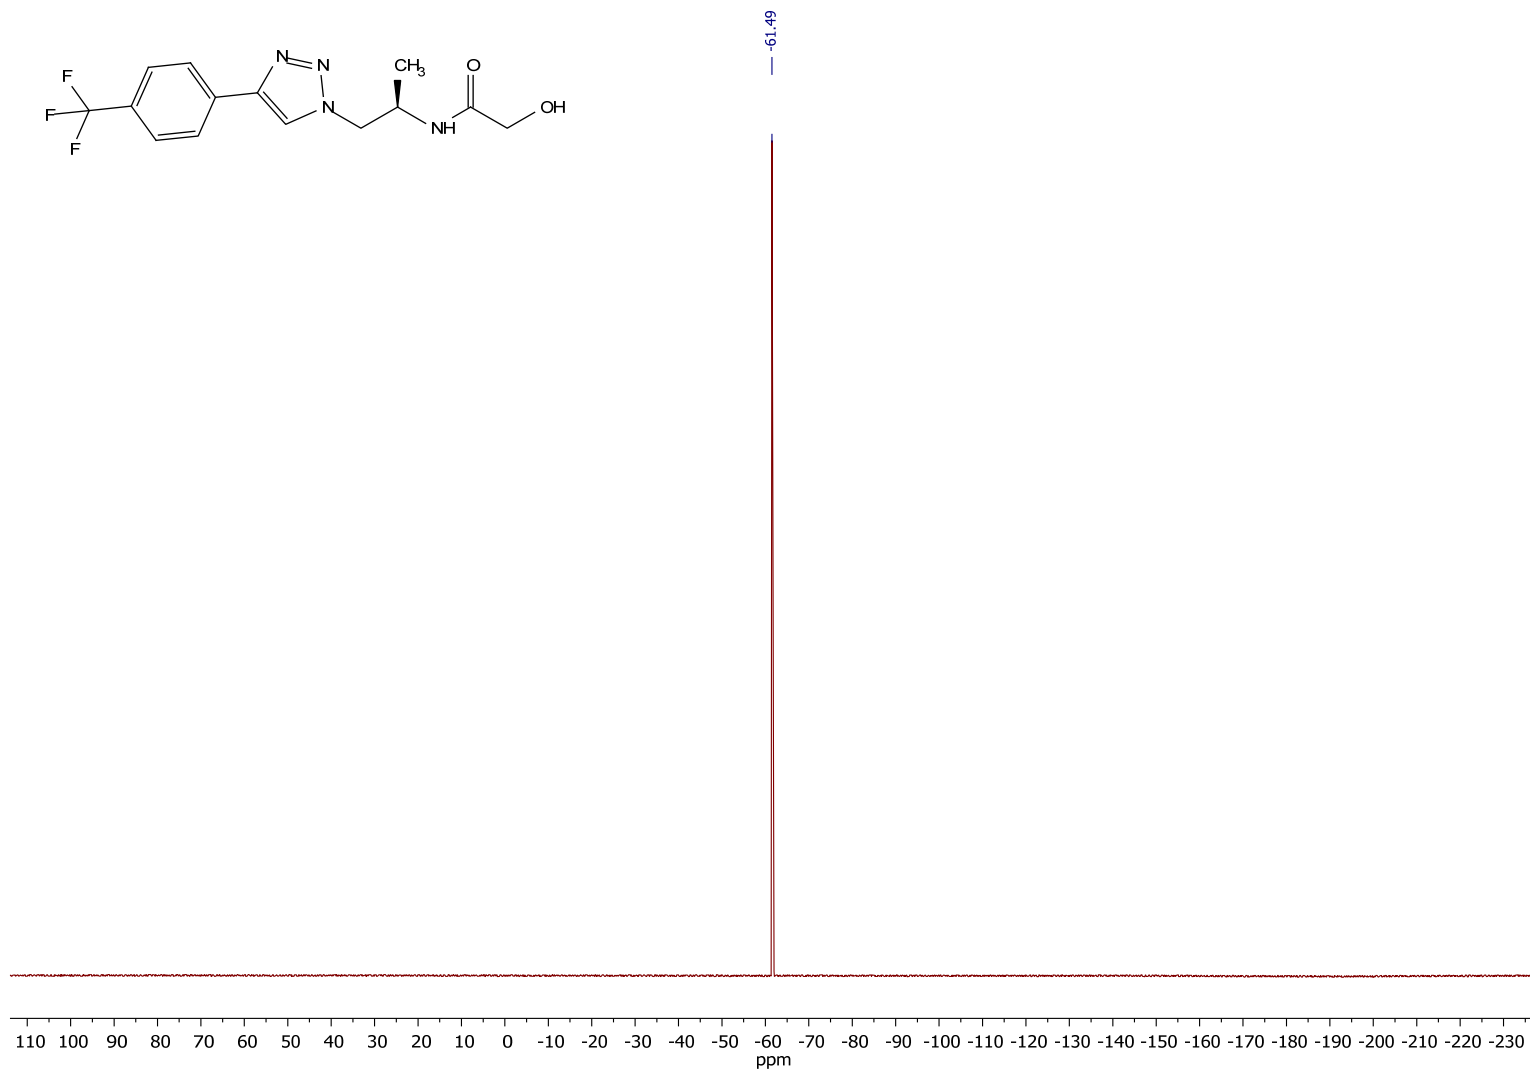

(*R*)-2-Hydroxy-*N*-(1-(4-(4-(trifluoromethyl)phenyl)-1*H*-1,2,3-triazol-1-yl)propan-2-yl)acetamide **15** {2,30,29},  $^{19}\text{F}$  NMR (376 MHz,  $\text{DMSO-}d_6$ )

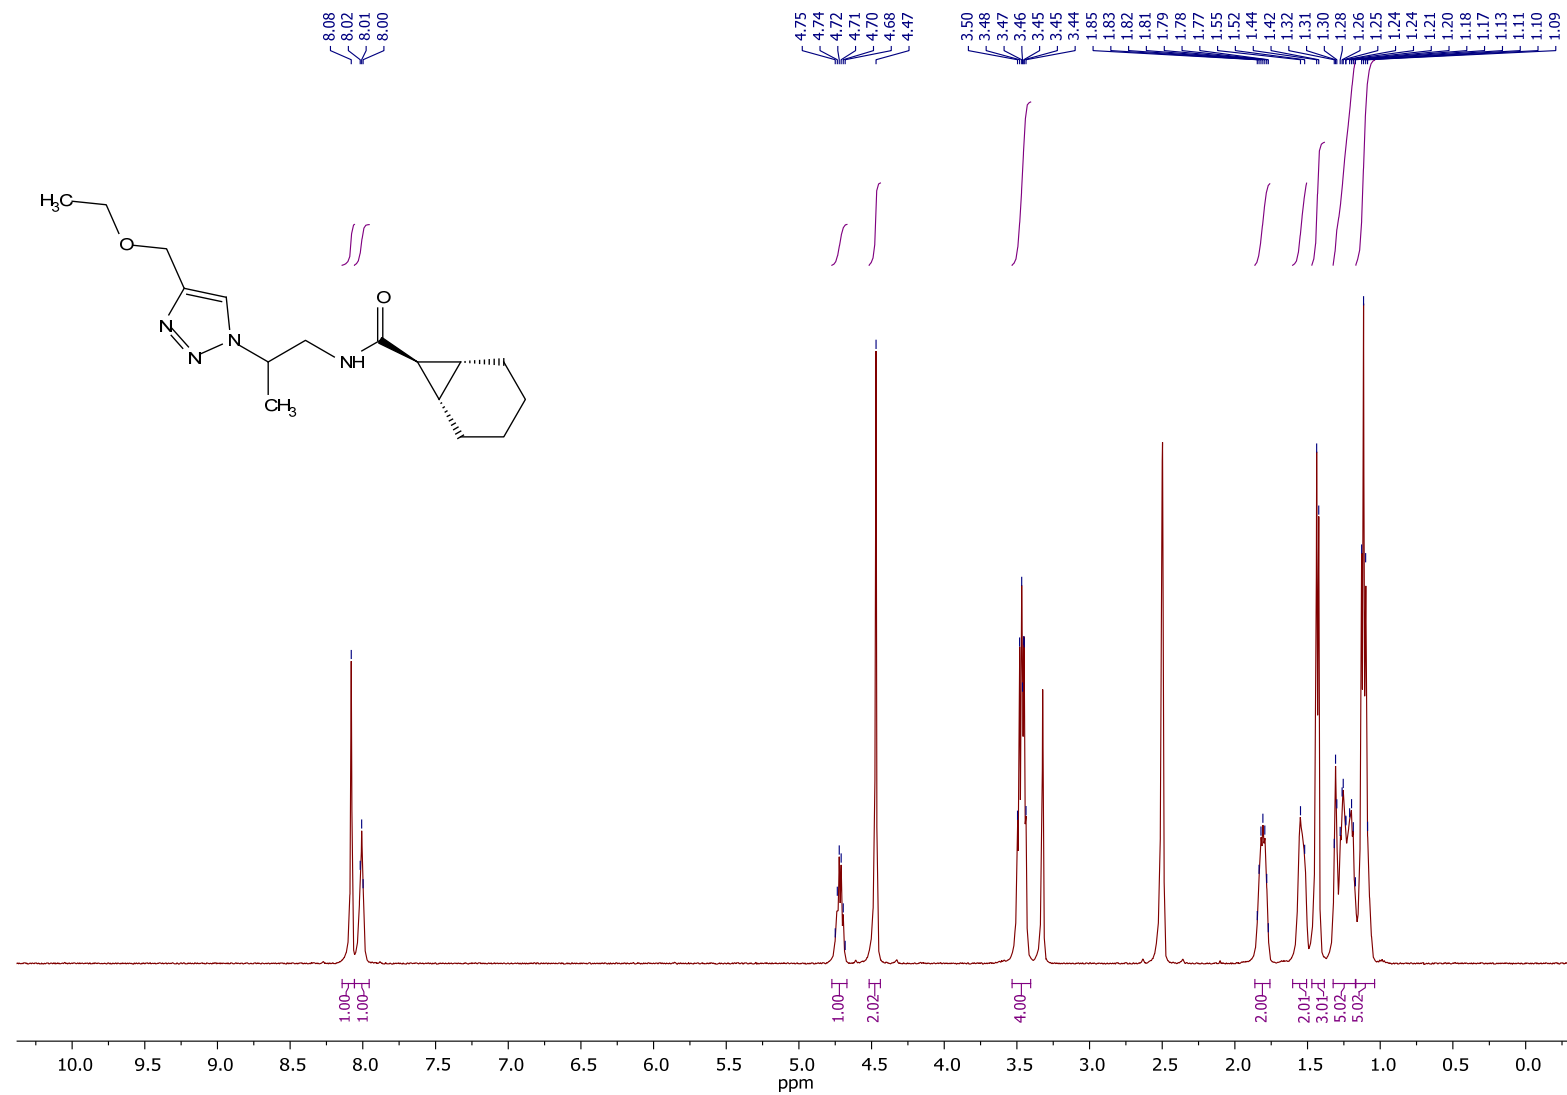

(1R,6S,7r)-N-(2-(4-(Ethoxymethyl)-1H-1,2,3-triazol-1-yl)propyl)bicyclo[4.1.0]heptane-7-carboxamide (**15**{4,15,14}), <sup>1</sup>H NMR (500 MHz, DMSO-d<sub>6</sub>)

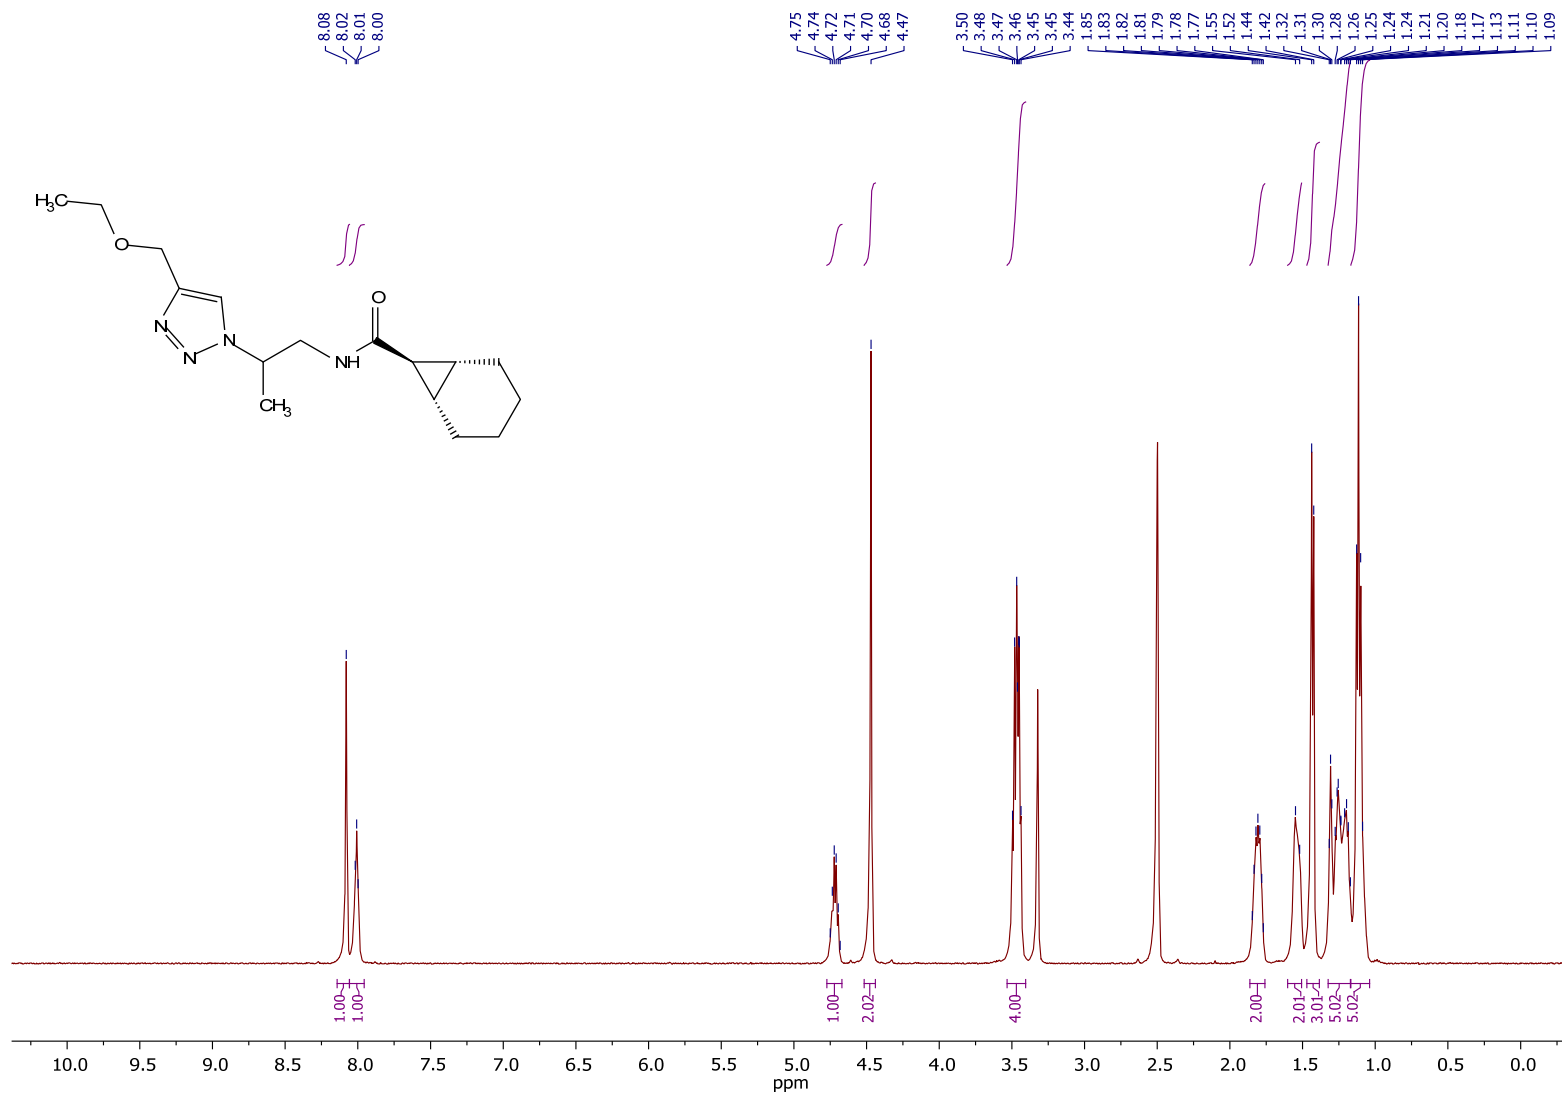

(1R,6S,7r)-N-(2-(4-(Ethoxymethyl)-1H-1,2,3-triazol-1-yl)propyl)bicyclo[4.1.0]heptane-7-carboxamide (**15**{4,15,14}),  
<sup>13</sup>C NMR (126 MHz, DMSO-*d*<sub>6</sub>)

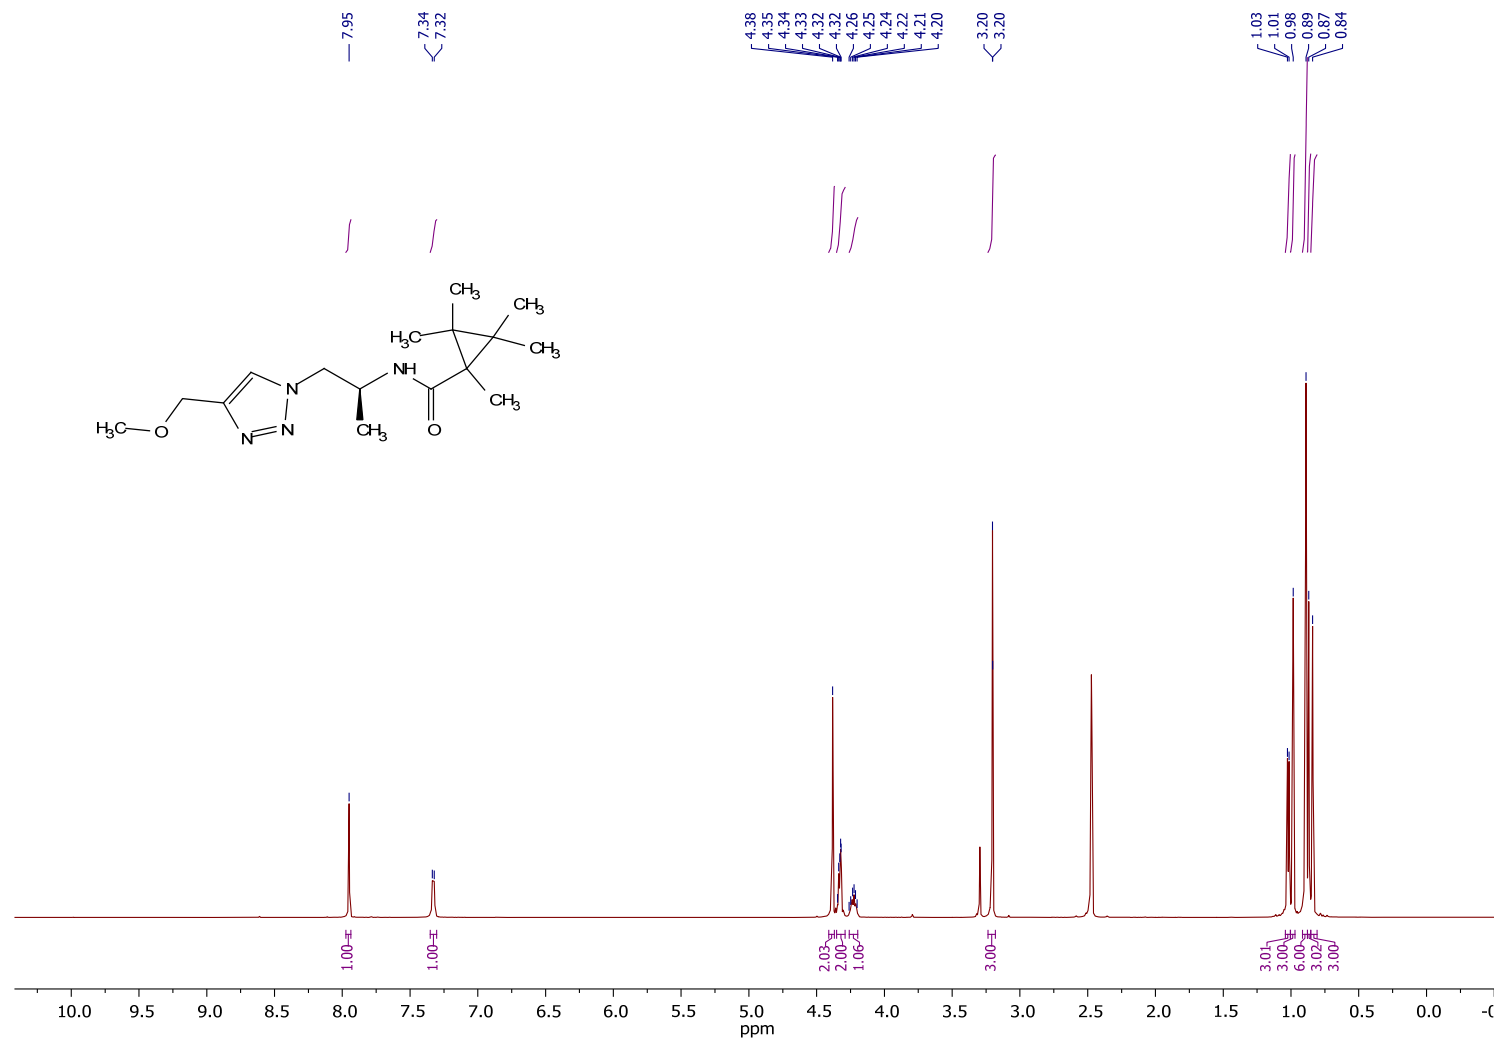

(*S*)-*N*-(1-(4-(Methoxymethyl)-1*H*-1,2,3-triazol-1-yl)propan-2-yl)-1,2,2,3,3-pentamethylcyclopropanecarboxamide (**15**{6,14,13}),  
<sup>1</sup>H NMR (600 MHz, DMSO-*d*<sub>6</sub>)

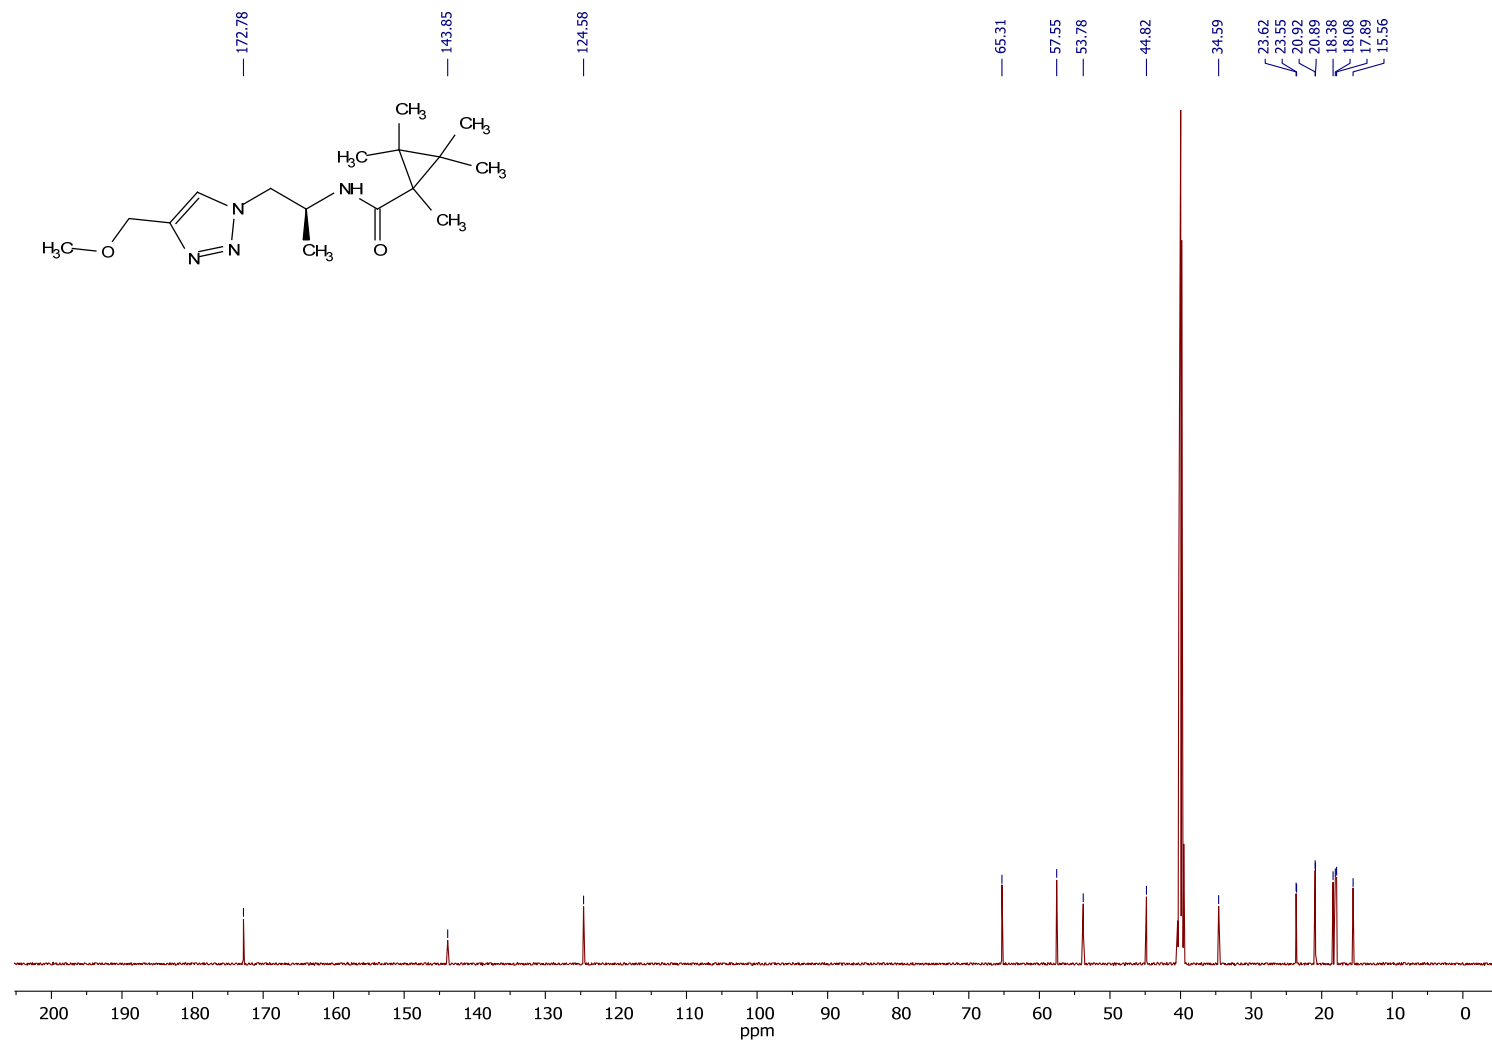

(S)-N-(1-(4-(Methoxymethyl)-1H-1,2,3-triazol-1-yl)propan-2-yl)-1,2,2,3,3-pentamethylcyclopropanecarboxamide (**15**{6,14,13}),  
<sup>13</sup>C NMR (151 MHz, DMSO-*d*<sub>6</sub>)

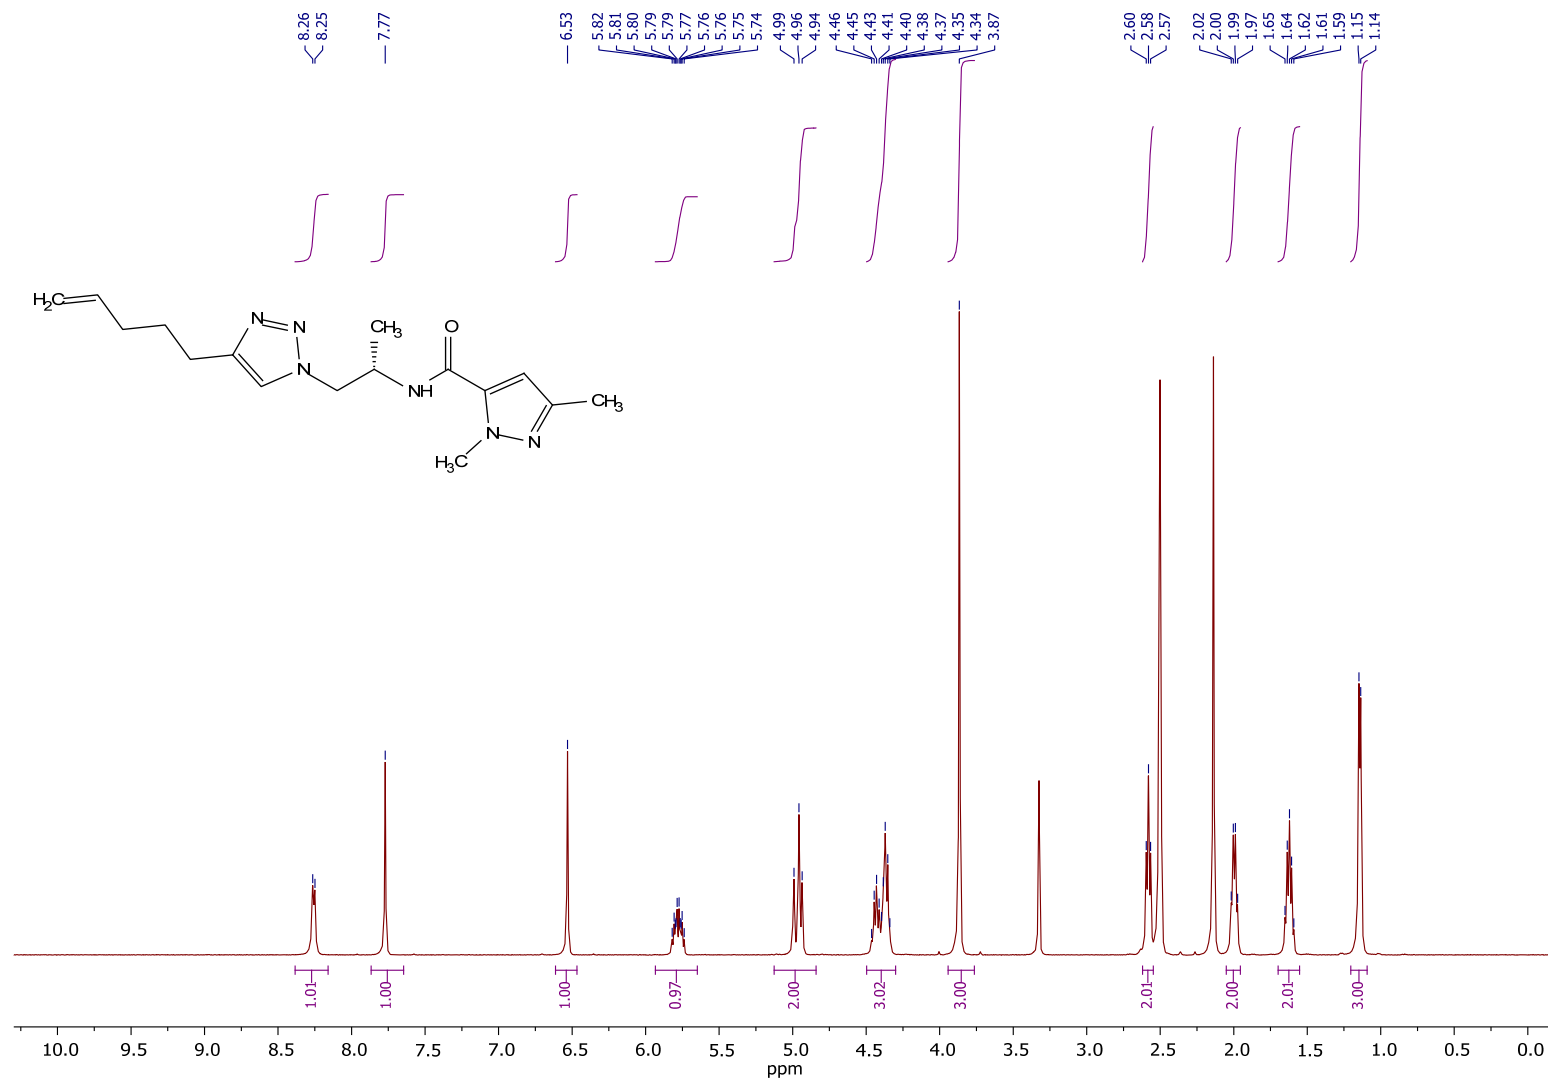

(*S*)-1,3-Dimethyl-*N*-(1-(4-(pent-4-en-1-yl)-1*H*-1,2,3-triazol-1-yl)propan-2-yl)-1*H*-pyrazole-5-carboxamide **15** {6,9,9},  
<sup>1</sup>H NMR (500 MHz, DMSO-*d*<sub>6</sub>)



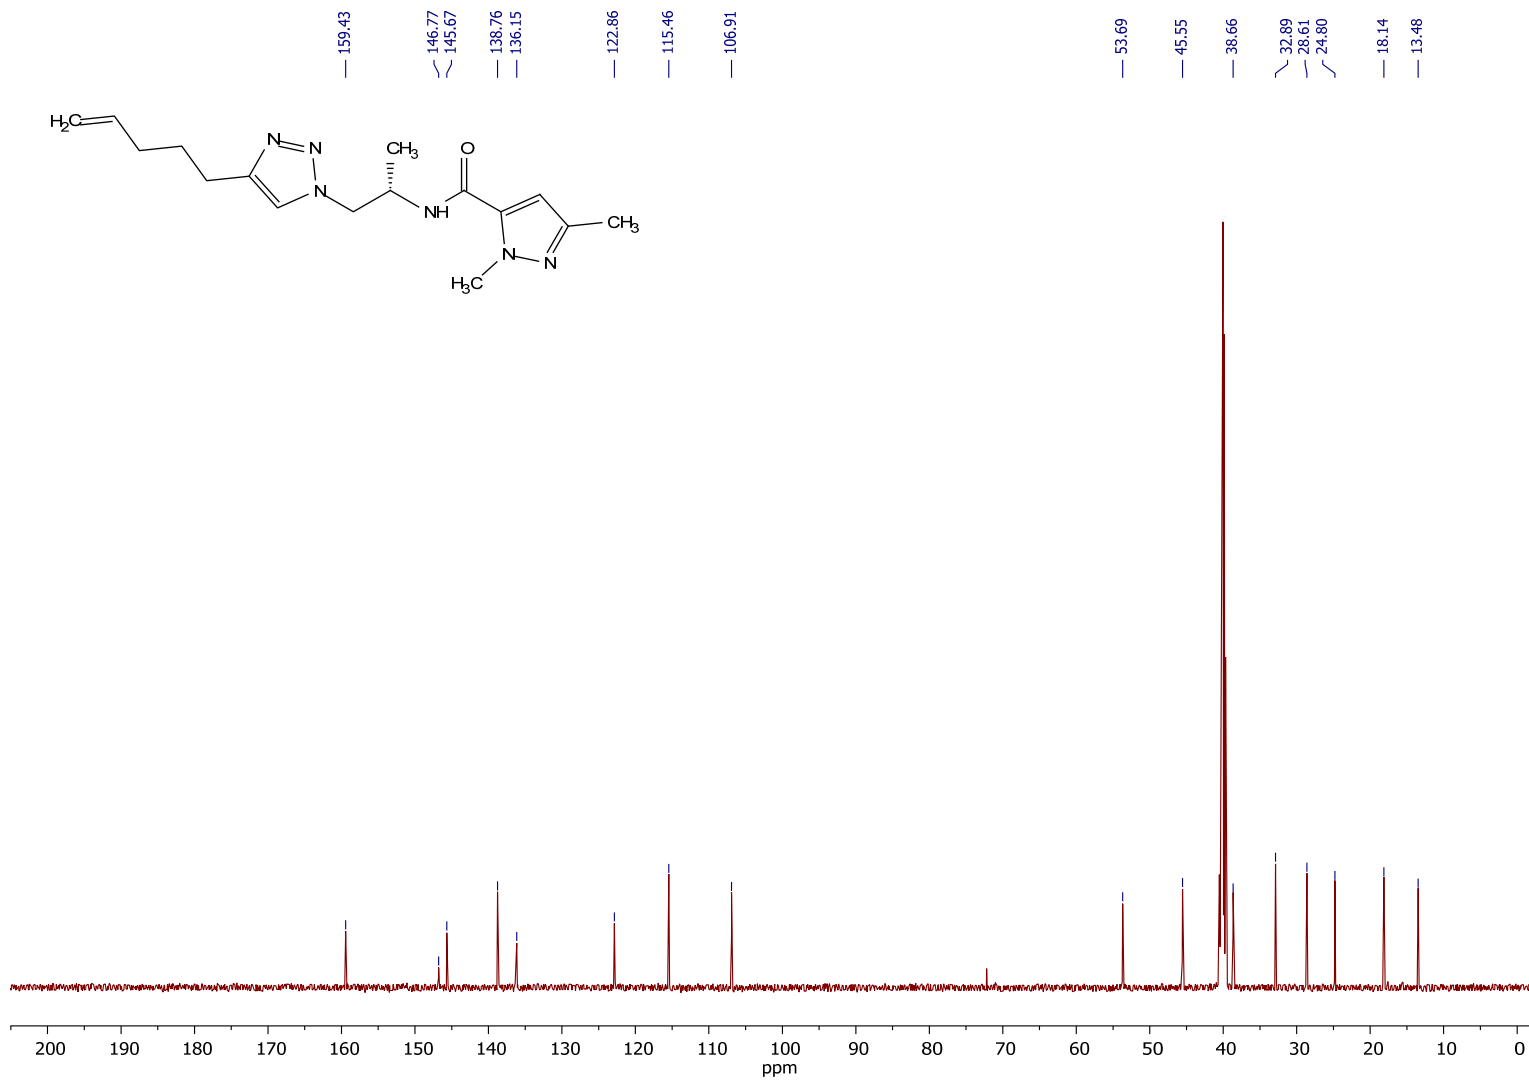

*(S)*-1,3-Dimethyl-*N*-(1-(4-(pent-4-en-1-yl)-1*H*-1,2,3-triazol-1-yl)propan-2-yl)-1*H*-pyrazole-5-carboxamide **15**{6,9,9},  
<sup>13</sup>C NMR (126 MHz, DMSO-*d*<sub>6</sub>)

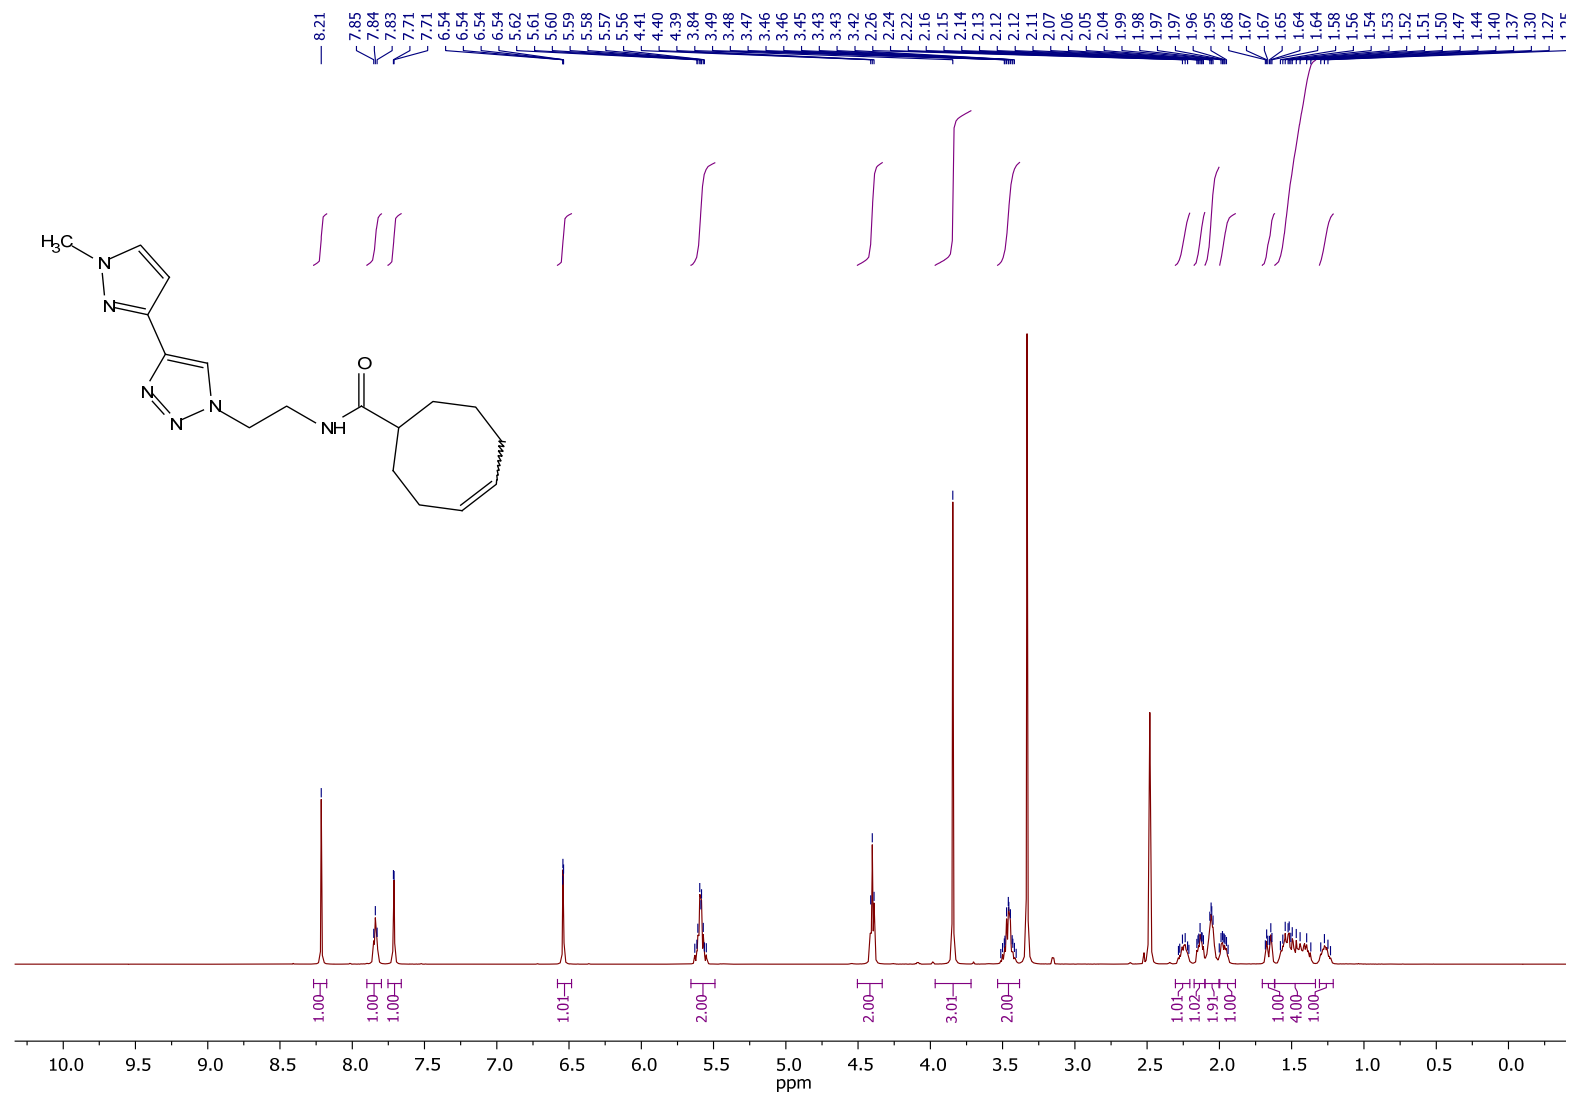

*N*-(2-(4-(1-Methyl-1*H*-pyrazol-3-yl)-1*H*-1,2,3-triazol-1-yl)ethyl)cyclooct-4-enecarboxamide **15**{3,3,3}, <sup>1</sup>H NMR (500 MHz, DMSO-d<sub>6</sub>)

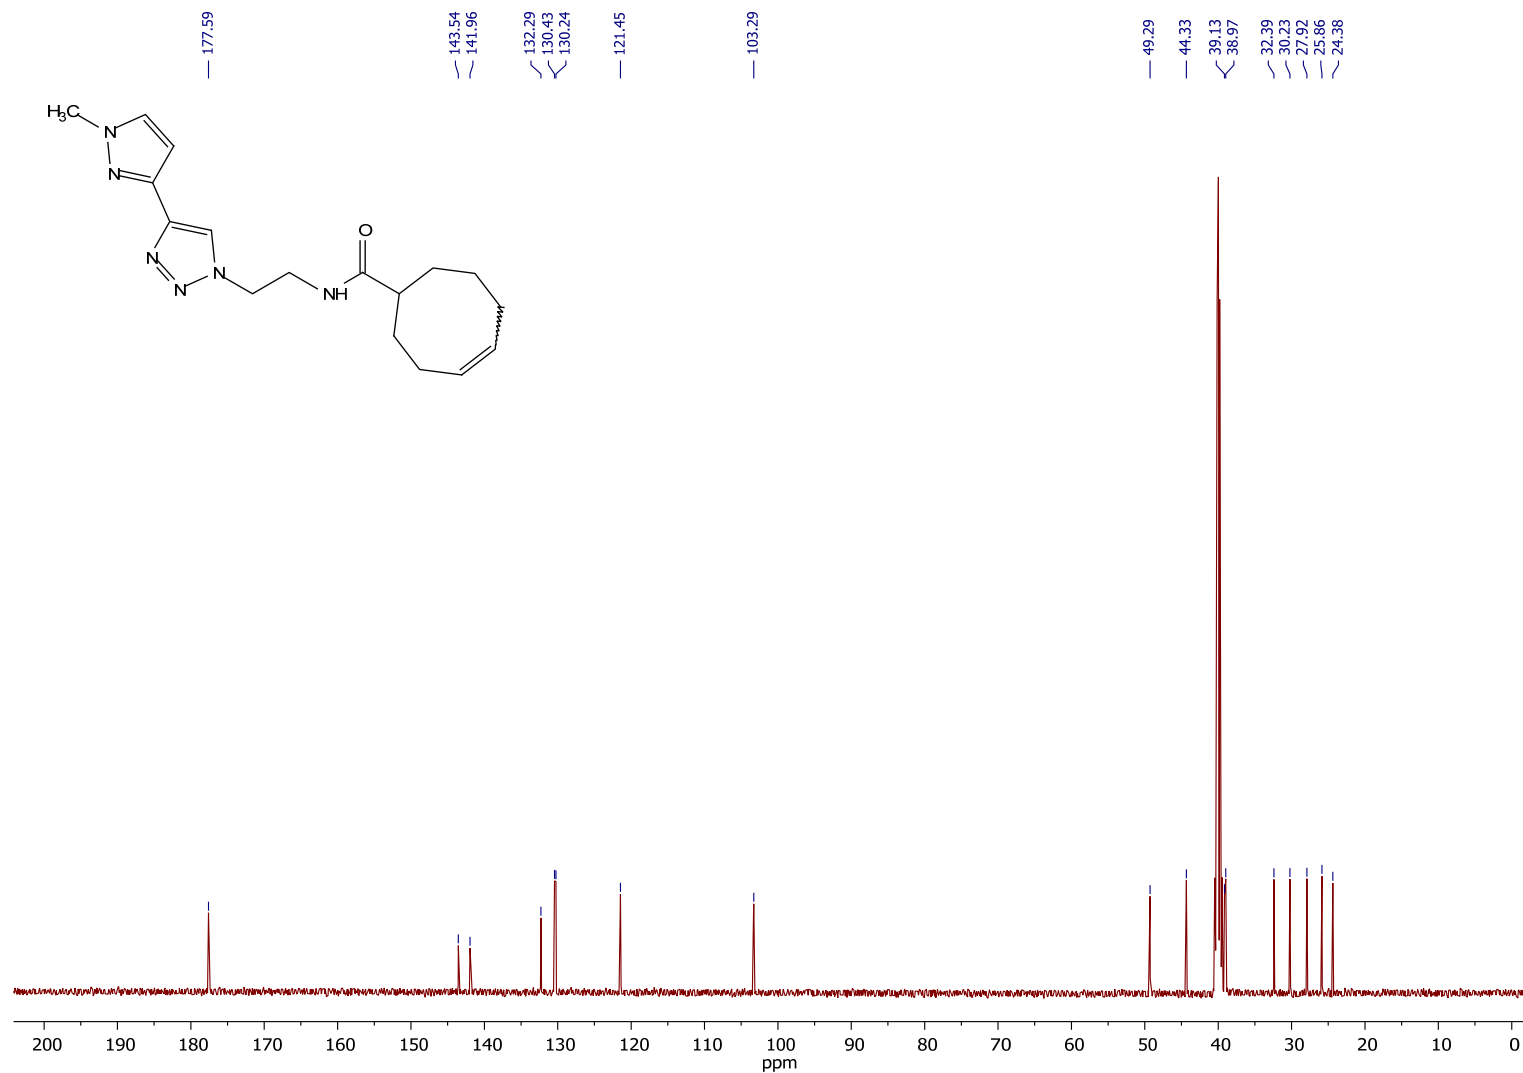

*N*-(2-(4-(1-Methyl-1*H*-pyrazol-3-yl)-1*H*-1,2,3-triazol-1-yl)ethyl)cyclooct-4-enecarboxamide **15**{3,3,3}, <sup>13</sup>C NMR (126 MHz, DMSO-*d*<sub>6</sub>)

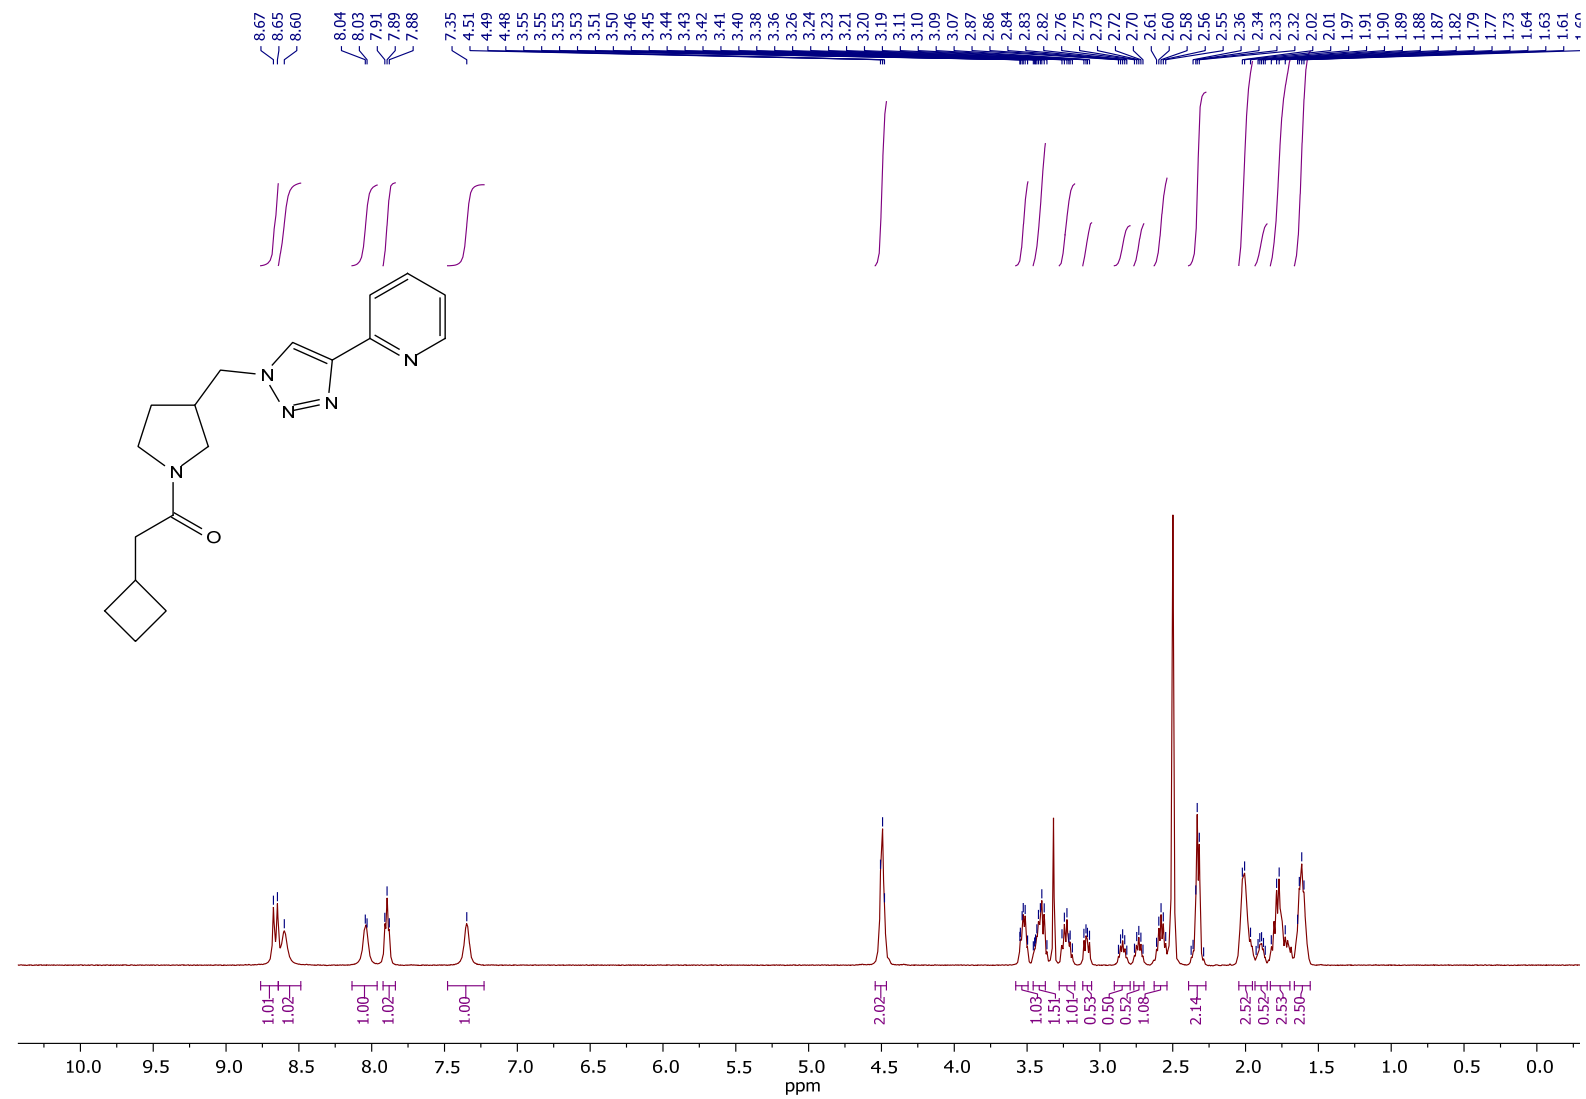

2-Cyclobutyl-1-(3-((4-(pyridin-2-yl)-1H-1,2,3-triazol-1-yl)methyl)pyrrolidin-1-yl)ethanone (**15** {8,10,10}), <sup>1</sup>H NMR (500 MHz, DMSO-*d*<sub>6</sub>)

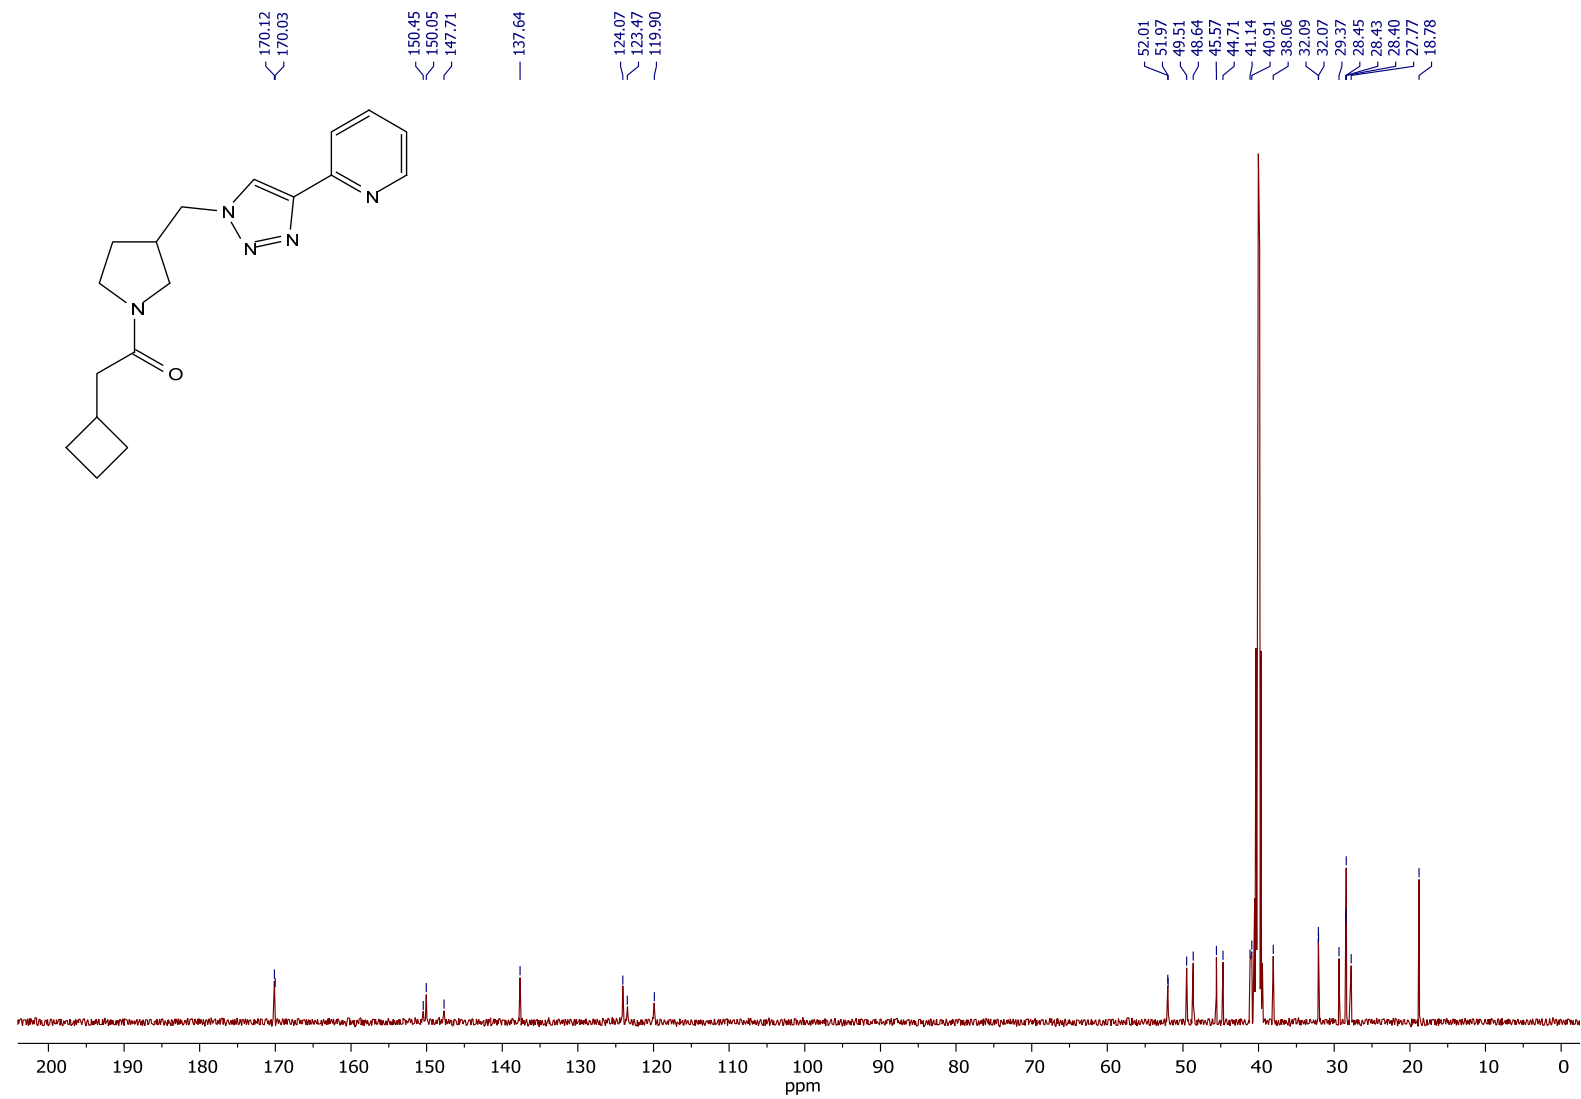

2-Cyclobutyl-1-(3-((4-(pyridin-2-yl)-1H-1,2,3-triazol-1-yl)methyl)pyrrolidin-1-yl)ethanone (**15**{8,10,10}), <sup>13</sup>C NMR (126 MHz, DMSO-*d*<sub>6</sub>)
